# Supplementary material
Source: ML conference proceedings conference paper supplement (https://openreview.net/forum?id=Cug26Y0RlT)
Supplement: supplementary_material [file beachdata1.xlsx]

## Sheet: 无海堤
序号	有无海堤	有无干滩	沙滩代码	沙滩名称	地理位置			剖面号	剖面方位角(º)	剖面长度(m)	测点号	地理坐标		与起点距离x(m)	平均海平面y(m)	潮间带坡度	平均粒径	粒度系数(φ)				对应潮汐点位序号	年平均大潮潮差(m)	年平均潮差(m)	主波向数据					相对潮差RTR	无量纲沉降速率Ω	高潮泥沙沉降速度ωs(cm/s)	破波波高Hb(m)	深水波波高Hd(m)	年平均周期(s)
					省	市	区(县)					经度(º)	纬度(º)					平均粒径(Mz)	分选系数(δ)	偏态(Sk)	峰态(Kg)				主波向	主波向度数	频率	平均波高(m）	周期(s)
2	无	有	3501280092	平潭县六秀下澳沙滩	福建省	福州市	平潭县	3501280092P01	29	146.78	3501280092P01-022	119.739	25.6371	0	2.682	0.0563673	0.704172	0.506	1.246	0.086	0.938	147	5.60574	4.55496	ENE	65	0.433182	1.149	5.043	4.58055	2.50048	10.9513	1.22381	1.11659	4.46916
											3501280092P01-023	119.739	25.6371	3.16	2.433
											3501280092P01-024	119.739	25.6371	6.68	2.172
											3501280092P01-025	119.739	25.6371	10.16	1.911
											3501280092P01-026	119.739	25.6372	13.34	1.664
											3501280092P01-027	119.739	25.6372	16.63	1.42
											3501280092P01-028	119.739	25.6372	19.96	1.182
											3501280092P01-029	119.739	25.6372	23.12	0.986
											3501280092P01-030	119.739	25.6373	26.97	0.728
											3501280092P01-031	119.739	25.6373	30.48	0.515
											3501280092P01-032	119.739	25.6373	35.09	0.327
											3501280092P01-033	119.739	25.6374	40.36	0.059
											3501280092P01-034	119.739	25.6374	44.93	-0.104
											3501280092P01-035	119.739	25.6374	49.02	-0.22
											3501280092P01-036	119.739	25.6375	53.2	-0.313
											3501280092P01-037	119.739	25.6375	56.94	-0.487
											3501280092P01-038	119.739	25.6375	60.54	-0.689
											3501280092P01-039	119.739	25.6376	63.12	-0.853
											3501280092P01-040	119.739	25.6376	65.24	-1.01
											3501280092P01-041	119.739	25.6376	67.18	-1.198
											3501280092P01-042	119.739	25.6376	69.34	-1.36
											3501280092P01-043	119.739	25.6376	71.21	-1.5
											3501280092P01-044	119.739	25.6376	73.36	-1.656
											3501280092P01-045	119.739	25.6377	75.82	-1.76
											3501280092P01-046	119.739	25.6377	78.39	-1.874
											3501280092P01-047	119.739	25.6377	81.34	-2.021
											3501280092P01-048	119.739	25.6377	85.09	-2.176
											3501280092P01-049	119.739	25.6378	88.42	-2.302
3	无	有	3501280102	平潭县桃澳底澳沙滩	福建省	福州市	平潭县	3501280102P01	15	167.21	3501280102P01-021	119.743	25.63	0	2.732	0.0307698	1.07421	-0.103275	1.01766	-0.221046	0.901966	147	5.60574	4.55496	ENE	65	0.433182	1.149	5.043	4.58055	1.67275	16.3704	1.22381	1.11659	4.46916
											3501280102P01-022	119.743	25.63	2.01	2.482
											3501280102P01-023	119.743	25.63	3.98	2.212
											3501280102P01-024	119.743	25.63	6	1.963
											3501280102P01-025	119.743	25.6301	8.08	1.705
											3501280102P01-026	119.743	25.6301	9.97	1.508
											3501280102P01-027	119.743	25.6301	11.22	1.37
											3501280102P01-028	119.744	25.6301	13	1.181
											3501280102P01-029	119.744	25.6301	14.29	1.01
											3501280102P01-030	119.744	25.6301	15.89	0.876
											3501280102P01-031	119.744	25.6301	18.02	0.729
											3501280102P01-032	119.744	25.6302	21.55	0.628
											3501280102P01-033	119.744	25.6302	26.87	0.515
											3501280102P01-034	119.744	25.6303	34.07	0.34
											3501280102P01-035	119.744	25.6303	40.81	0.241
											3501280102P01-036	119.744	25.6304	49.07	0.114
											3501280102P01-037	119.744	25.6305	56.02	-0.003
											3501280102P01-038	119.744	25.6306	64.85	-0.139
											3501280102P01-039	119.744	25.6306	72.51	-0.257
											3501280102P01-040	119.744	25.6307	80.2	-0.401
											3501280102P01-041	119.744	25.6308	88.28	-0.594
											3501280102P01-042	119.744	25.6308	93.89	-0.711
											3501280102P01-043	119.744	25.6309	100.02	-0.834
											3501280102P01-044	119.744	25.6309	105.58	-0.968
											3501280102P01-045	119.744	25.631	111.72	-1.096
											3501280102P01-046	119.744	25.631	116.85	-1.207
											3501280102P01-047	119.744	25.6311	123.78	-1.357
											3501280102P01-048	119.744	25.6312	134.84	-1.417
4	无	有	3501280112	平潭县小湾底澳沙滩	福建省	福州市	平潭县	3501280112P01	258	66.3	3501280112P01-011	119.748	25.6378	0	2.582	0.0987407	1.56886	-0.64972	1.39832	0.225539	0.580496	147	5.60574	4.55496	ENE	65	0.433182	1.149	5.043	4.58055	1.2089	22.6516	1.22381	1.11659	4.46916
											3501280112P01-012	119.748	25.6378	2.05	2.306
											3501280112P01-013	119.748	25.6378	4.15	1.996
											3501280112P01-014	119.748	25.6378	6.08	1.734
											3501280112P01-015	119.748	25.6378	8.46	1.438
											3501280112P01-016	119.748	25.6378	10.96	1.14
											3501280112P01-017	119.748	25.6378	13.52	0.852
											3501280112P01-018	119.748	25.6378	16.42	0.553
											3501280112P01-019	119.748	25.6378	19.1	0.341
											3501280112P01-020	119.748	25.6378	21.8	0.041
											3501280112P01-021	119.748	25.6377	24.25	-0.154
											3501280112P01-022	119.748	25.6377	26.9	-0.392
											3501280112P01-023	119.748	25.6377	28.96	-0.537
											3501280112P01-024	119.748	25.6377	31.3	-0.708
											3501280112P01-025	119.748	25.6377	33.71	-0.89
											3501280112P01-026	119.748	25.6377	36.48	-1.096
											3501280112P01-027	119.748	25.6377	39.12	-1.357
											3501280112P01-028	119.748	25.6377	40.5	-1.417
6	无	有	3501280142	平潭县丰田下澳沙滩	福建省	福州市	平潭县	3501280142P01	348	146.53	3501280142P01-027	119.769	25.6593	0	2.774	0.0770202	0.316295	1.66066	0.931171	-0.48798	1.60097	147	5.60574	4.55496	ENE	65	0.433182	1.149	5.043	4.58055	6.18487	4.42751	1.22381	1.11659	4.46916
											3501280142P01-028	119.769	25.6593	3.35	2.479
											3501280142P01-029	119.769	25.6593	6.2	2.22
											3501280142P01-030	119.769	25.6594	9.22	1.939
											3501280142P01-031	119.769	25.6594	12.24	1.665
											3501280142P01-032	119.769	25.6594	14.79	1.394
											3501280142P01-033	119.769	25.6594	17.73	1.141
											3501280142P01-034	119.769	25.6595	19.85	0.974
											3501280142P01-035	119.769	25.6595	23.06	0.711
											3501280142P01-036	119.769	25.6595	26.65	0.435
											3501280142P01-037	119.769	25.6596	29.93	0.156
											3501280142P01-038	119.769	25.6596	32.99	-0.073
											3501280142P01-039	119.769	25.6596	36.4	-0.357
											3501280142P01-040	119.769	25.6596	39.53	-0.611
											3501280142P01-041	119.769	25.6597	42.99	-0.856
											3501280142P01-042	119.768	25.6597	46.79	-1.126
											3501280142P01-043	119.768	25.6597	50.3	-1.395
											3501280142P01-044	119.768	25.6598	54.33	-1.69
											3501280142P01-045	119.768	25.6598	58.13	-1.945
											3501280142P01-046	119.768	25.6598	60.56	-2.112
											3501280142P01-047	119.768	25.6599	64.26	-2.328
											3501280142P01-048	119.768	25.6599	67.6	-2.538
											3501280142P01-049	119.768	25.6599	71.28	-2.716
7	无	有	3501280152	平潭县甲澳沙滩	福建省	福州市	平潭县	3501280152P01	315	133.6	3501280152P43-015	119.776	25.6635	0	2.694	0.0505046	0.389537	1.36017	0.549685	-0.0049508	0.944617	147	5.60574	4.55496	ENE	65	0.433182	1.149	5.043	4.58055	4.78517	5.72259	1.22381	1.11659	4.46916
											3501280152P43-016	119.776	25.6635	2.19	2.484
											3501280152P43-017	119.776	25.6635	4.42	2.29
											3501280152P43-018	119.776	25.6635	6.77	2.042
											3501280152P43-019	119.776	25.6636	9.7	1.794
											3501280152P43-020	119.776	25.6636	12.53	1.581
											3501280152P43-021	119.776	25.6636	15.56	1.343
											3501280152P43-022	119.776	25.6636	18.65	1.097
											3501280152P43-023	119.776	25.6636	21.79	0.912
											3501280152P43-024	119.776	25.6637	25.55	0.687
											3501280152P43-025	119.776	25.6637	30.72	0.443
											3501280152P43-026	119.776	25.6637	35.21	0.239
											3501280152P43-027	119.776	25.6637	39.68	0.005
											3501280152P43-028	119.776	25.6638	43.53	-0.177
											3501280152P43-029	119.776	25.6638	47.93	-0.354
											3501280152P43-030	119.776	25.6638	53.27	-0.593
											3501280152P43-031	119.776	25.6639	57.43	-0.726
											3501280152P43-032	119.776	25.6639	61.14	-0.898
											3501280152P43-033	119.776	25.6639	65.41	-1.077
											3501280152P43-034	119.776	25.6639	70.52	-1.296
											3501280152P43-035	119.775	25.664	75.13	-1.491
											3501280152P43-036	119.775	25.664	80.52	-1.685
											3501280152P43-037	119.775	25.664	86.61	-1.933
											3501280152P43-038	119.775	25.6641	92.42	-2.156
											3501280152P43-039	119.775	25.6641	96.66	-2.32
											3501280152P43-040	119.775	25.6641	101.74	-2.508
											3501280152P43-041	119.775	25.6642	107.02	-2.711
9	无	无	3501280172	平潭县南澳碗澳沙滩	福建省	福州市	平潭县	3501280172P01	145	63.15	3501280172P01-010	119.778	25.6519	0	2.731	0.0873664	0.334097	1.58166	0.822248	-0.126355	1.00879	151	5.58227	4.52	NE	50	0.36589	1.641	4.689	3.92577	6.40509	4.74401	1.42196	1.31632	4.67968
											3501280172P01-011	119.778	25.6519	1.69	2.547
											3501280172P01-012	119.778	25.6519	3.62	2.351
											3501280172P01-013	119.778	25.6518	5.65	2.123
											3501280172P01-014	119.778	25.6518	7.6	1.841
											3501280172P01-015	119.778	25.6518	9.86	1.602
											3501280172P01-016	119.779	25.6518	13.69	1.063
											3501280172P01-017	119.779	25.6518	17.16	0.854
											3501280172P01-018	119.779	25.6517	20.57	0.513
											3501280172P01-019	119.779	25.6517	24.52	0.029
											3501280172P01-020	119.779	25.6517	29.06	-0.465
											3501280172P01-021	119.779	25.6516	35.21	-0.824
											3501280172P01-022	119.779	25.6516	42.35	-1.277
											3501280172P01-023	119.779	25.6515	47.73	-1.439
10	无	有	3501280182	平潭县长江澳沙滩	福建省	福州市	平潭县	3501280182P40	58	339.74	3501280182P40-055	119.775	25.6225	0	2.722	0.0176351	0.26739	1.90298	0.91922	-0.508857	1.75063	151	5.58227	4.52	NE	50	0.36589	1.641	4.689	3.92577	8.54481	3.55605	1.42196	1.31632	4.67968
											3501280182P40-056	119.775	25.6225	4.9	2.628
											3501280182P40-057	119.776	25.6225	9.76	2.536
											3501280182P40-058	119.776	25.6226	15.06	2.427
											3501280182P40-059	119.776	25.6226	19.97	2.289
											3501280182P40-060	119.776	25.6226	24.75	2.175
											3501280182P40-061	119.776	25.6226	29.63	2.057
											3501280182P40-062	119.776	25.6227	34.68	1.928
											3501280182P40-063	119.776	25.6227	39.81	1.896
											3501280182P40-064	119.776	25.6227	44.86	1.775
											3501280182P40-065	119.776	25.6227	50.15	1.679
											3501280182P40-066	119.776	25.6228	55.65	1.584
											3501280182P40-067	119.776	25.6228	61.14	1.494
											3501280182P40-068	119.776	25.6228	66.55	1.416
											3501280182P40-069	119.776	25.6228	71.7	1.341
											3501280182P40-070	119.776	25.6229	78.25	1.239
											3501280182P40-071	119.776	25.6229	84	1.054
											3501280182P40-072	119.776	25.6229	89.63	1.028
											3501280182P40-073	119.776	25.6229	95.39	0.936
											3501280182P40-074	119.776	25.623	101.03	0.841
											3501280182P40-075	119.776	25.623	106.65	0.734
											3501280182P40-076	119.776	25.623	111.8	0.662
											3501280182P40-077	119.776	25.623	117.06	0.568
											3501280182P40-078	119.776	25.6231	122.56	0.465
											3501280182P40-079	119.777	25.6231	128.02	0.342
											3501280182P40-080	119.777	25.6231	133.72	0.257
											3501280182P40-081	119.777	25.6232	139.3	0.157
											3501280182P40-082	119.777	25.6232	144.86	0.059
											3501280182P40-083	119.777	25.6232	150.54	-0.03
											3501280182P40-084	119.777	25.6232	155.86	-0.108
											3501280182P40-085	119.777	25.6233	161.36	-0.212
											3501280182P40-086	119.777	25.6233	166.57	-0.289
											3501280182P40-087	119.777	25.6233	172.06	-0.383
											3501280182P40-088	119.777	25.6233	177.52	-0.49
											3501280182P40-089	119.777	25.6234	182.49	-0.555
											3501280182P40-090	119.777	25.6234	188.03	-0.643
											3501280182P40-091	119.777	25.6234	193.15	-0.726
											3501280182P40-092	119.777	25.6234	198.68	-0.829
											3501280182P40-093	119.777	25.6235	203.77	-0.933
											3501280182P40-094	119.777	25.6235	209.27	-1.015
											3501280182P40-095	119.777	25.6235	214.68	-1.099
											3501280182P40-096	119.777	25.6235	219.78	-1.204
											3501280182P40-097	119.777	25.6236	224.95	-1.283
											3501280182P40-098	119.777	25.6236	230.11	-1.368
											3501280182P40-099	119.777	25.6236	233.82	-1.435
											3501280182P40-100	119.777	25.6236	236.82	-1.506
											3501280182P40-101	119.777	25.6236	241.21	-1.534
											3501280182P40-102	119.778	25.6237	245.59	-1.605
											3501280182P40-103	119.778	25.6237	250.41	-1.694
11	无	有	3501280212	平潭县流水澳沙滩	福建省	福州市	平潭县	3501280212P37	18	175.35	3501280212P37-027	119.848	25.5659	0	2.738	0.0310566	0.220925	2.17837	0.693438	-0.355498	2.26216	152	5.54991	4.48337	NE	50	0.406814	1.916	4.992	3.47035	12.1454	2.73263	1.59924	1.50243	4.81859
											3501280212P37-028	119.848	25.5659	5.13	2.614
											3501280212P37-029	119.848	25.566	10.72	2.454
											3501280212P37-030	119.848	25.566	16.03	2.334
											3501280212P37-031	119.848	25.5661	21.38	2.233
											3501280212P37-032	119.848	25.5661	26.61	2.107
											3501280212P37-033	119.848	25.5662	33.46	1.935
											3501280212P37-034	119.848	25.5663	41.03	1.717
											3501280212P37-035	119.848	25.5663	47.66	1.561
											3501280212P37-036	119.848	25.5664	55.18	1.369
											3501280212P37-037	119.848	25.5664	62.67	1.174
											3501280212P37-038	119.848	25.5665	70.07	0.925
											3501280212P37-039	119.848	25.5666	76.79	0.772
											3501280212P37-040	119.848	25.5666	85.51	0.505
											3501280212P37-041	119.848	25.5667	93.16	0.235
											3501280212P37-042	119.848	25.5668	100.45	-0.041
											3501280212P37-043	119.848	25.5668	107.21	-0.339
											3501280212P37-044	119.848	25.5669	113.26	-0.502
											3501280212P37-045	119.848	25.5669	119.1	-0.653
											3501280212P37-046	119.848	25.567	123.85	-0.876
											3501280212P37-047	119.848	25.567	129.28	-1.277
12	无	有	3501280222	平潭县南澳底澳沙滩	福建省	福州市	平潭县	3501280222P34	91	100.24	3501280222P34-029	119.86	25.5465	0	2.723	0.054696	0.176175	2.50492	0.376193	-0.177879	0.910661	153	5.54701	4.48526	ENE	63	0.454488	1.621	5.316	3.82042	15.3547	1.95949	1.45194	1.3305	4.82572
											3501280222P34-030	119.861	25.5465	2.83	2.54
											3501280222P34-031	119.861	25.5465	5.48	2.337
											3501280222P34-032	119.861	25.5465	8.25	2.133
											3501280222P34-033	119.861	25.5465	10.94	1.943
											3501280222P34-034	119.861	25.5465	14	1.726
											3501280222P34-035	119.861	25.5465	17.09	1.507
											3501280222P34-036	119.861	25.5465	19.95	1.313
											3501280222P34-037	119.861	25.5465	22.38	1.145
											3501280222P34-038	119.861	25.5465	24.83	0.991
											3501280222P34-039	119.861	25.5465	27.78	0.817
											3501280222P34-040	119.861	25.5465	30.38	0.687
											3501280222P34-041	119.861	25.5465	33.48	0.548
											3501280222P34-042	119.861	25.5465	36.35	0.419
											3501280222P34-043	119.861	25.5465	39.62	0.261
											3501280222P34-044	119.861	25.5465	42.2	0.147
											3501280222P34-045	119.861	25.5465	45.44	-0.035
											3501280222P34-046	119.861	25.5465	48.79	-0.157
											3501280222P34-047	119.861	25.5464	53.47	-0.324
											3501280222P34-048	119.861	25.5464	58.56	-0.48
13	无	有	3501280332	平潭县埠头角澳沙滩	福建省	福州市	平潭县	3501280332P20	184	111.9	3501280332P20-014	119.827	25.4722	0	2.692	0.0653838	0.258639	1.95099	0.820317	-0.387075	0.957278	154	5.53581	4.48362	ENE	69	0.564181	1.312	4.69	4.15947	8.39915	3.40023	1.33089	1.21434	4.66016
											3501280332P20-015	119.827	25.4722	2.36	2.402
											3501280332P20-016	119.827	25.4722	4.54	2.161
											3501280332P20-017	119.827	25.4721	6.97	1.935
											3501280332P20-018	119.827	25.4721	9.13	1.756
											3501280332P20-019	119.827	25.4721	11.61	1.587
											3501280332P20-020	119.827	25.4721	14.28	1.405
											3501280332P20-021	119.827	25.472	17.16	1.208
											3501280332P20-022	119.827	25.472	19.29	1.067
											3501280332P20-023	119.827	25.472	22.38	0.886
											3501280332P20-024	119.827	25.472	26.77	0.695
											3501280332P20-025	119.827	25.4719	30.75	0.47
											3501280332P20-026	119.827	25.4719	34.68	0.32
											3501280332P20-027	119.827	25.4719	37.65	0.185
											3501280332P20-028	119.827	25.4718	41.2	0.036
											3501280332P20-029	119.827	25.4718	45.13	-0.325
											3501280332P20-030	119.827	25.4718	49.11	-0.519
14	无	有	3501280362	平潭县敧澳仔澳沙滩	福建省	福州市	平潭县	3501280362P16	141	126.29	3501280362P16-017	119.779	25.4486	0	2.691	0.0535483	0.250855	1.99507	0.643557	-0.399035	1.34259	155	5.5355	4.48692	ENE	69	0.516718	1.358	4.653	3.88312	9.1526	3.26199	1.42553	1.30725	4.77472
											3501280362P16-018	119.779	25.4486	2.22	2.489
											3501280362P16-019	119.779	25.4485	4.7	2.331
											3501280362P16-020	119.779	25.4485	7.72	2.16
											3501280362P16-021	119.779	25.4485	10.83	1.994
											3501280362P16-022	119.779	25.4485	14.38	1.775
											3501280362P16-023	119.779	25.4485	17.79	1.606
											3501280362P16-024	119.779	25.4484	21.02	1.401
											3501280362P16-025	119.779	25.4484	24.31	1.237
											3501280362P16-026	119.779	25.4484	27.55	1.076
											3501280362P16-027	119.779	25.4484	27.54	1.055
											3501280362P16-028	119.779	25.4484	30.51	0.92
											3501280362P16-029	119.779	25.4483	34.45	0.724
											3501280362P16-030	119.779	25.4483	38.2	0.511
											3501280362P16-031	119.779	25.4483	42.66	0.31
											3501280362P16-032	119.779	25.4482	46.71	0.105
											3501280362P16-033	119.779	25.4482	51.62	-0.135
											3501280362P16-034	119.779	25.4482	55.54	-0.325
											3501280362P16-035	119.779	25.4482	59.94	-0.548
											3501280362P16-036	119.779	25.4481	64.36	-0.791
											3501280362P16-037	119.78	25.4481	68.24	-0.991
											3501280362P16-038	119.78	25.4481	72.66	-1.248
											3501280362P16-039	119.78	25.448	75.67	-1.361
15	无	有	3501280372	平潭县北澳沙滩	福建省	福州市	平潭县	3501280372P15	133	144.2	3501280372P15-020	119.771	25.4453	0	2.706	0.0372189	0.38288	1.38504	0.823402	-0.0337953	0.71138	155	5.5355	4.48692	ENE	69	0.516718	1.358	4.653	3.88312	5.32578	5.60588	1.42553	1.30725	4.77472
											3501280372P15-021	119.771	25.4453	5.94	2.437
											3501280372P15-022	119.771	25.4453	10.93	2.229
											3501280372P15-023	119.771	25.4452	16.85	2.015
											3501280372P15-024	119.771	25.4452	22.41	1.792
											3501280372P15-025	119.771	25.4452	28.61	1.544
											3501280372P15-026	119.771	25.4451	34.2	1.31
											3501280372P15-027	119.771	25.4451	40.56	1.062
											3501280372P15-028	119.771	25.4451	43.63	0.943
											3501280372P15-029	119.772	25.445	48.48	0.774
											3501280372P15-030	119.772	25.445	53.35	0.625
											3501280372P15-031	119.772	25.445	58.65	0.418
											3501280372P15-032	119.772	25.4449	64.95	0.244
											3501280372P15-033	119.772	25.4449	70.52	0.1
											3501280372P15-034	119.772	25.4449	76.93	-0.086
											3501280372P15-035	119.772	25.4448	82.1	-0.282
											3501280372P15-036	119.772	25.4448	87.2	-0.451
											3501280372P15-037	119.772	25.4448	91.36	-0.608
											3501280372P15-038	119.772	25.4448	93.97	-0.712
											3501280372P15-039	119.772	25.4447	99.17	-0.985
16	无	有	3501280382	平潭县崎沙澳沙滩	福建省	福州市	平潭县	3501280382P14	145	104.23	3501280382P14-018	119.766	25.443	0	2.533	0.0493264	0.249848	2.00088	0.584728	-0.428005	1.47961	155	5.5355	4.48692	ENE	69	0.516718	1.358	4.653	3.88312	9.20307	3.2441	1.42553	1.30725	4.77472
											3501280382P14-019	119.766	25.443	3.03	2.283
											3501280382P14-020	119.766	25.4429	6.3	2.082
											3501280382P14-021	119.766	25.4429	9.57	1.876
											3501280382P14-022	119.766	25.4429	12.53	1.712
											3501280382P14-023	119.766	25.4429	13.12	1.647
											3501280382P14-024	119.766	25.4429	16.41	1.51
											3501280382P14-025	119.766	25.4428	19.37	1.353
											3501280382P14-026	119.766	25.4428	24.76	1.117
											3501280382P14-027	119.766	25.4428	28.43	0.941
											3501280382P14-028	119.766	25.4427	32.57	0.814
											3501280382P14-029	119.766	25.4427	36.3	0.665
											3501280382P14-030	119.766	25.4427	40.22	0.506
											3501280382P14-031	119.766	25.4426	45.87	0.242
											3501280382P14-032	119.766	25.4426	50.39	0.052
											3501280382P14-033	119.766	25.4426	53.72	-0.104
											3501280382P14-034	119.766	25.4426	57.42	-0.281
											3501280382P14-035	119.766	25.4425	63.84	-0.616
18	无	有	3501280412	平潭县远垱澳沙滩	福建省	福州市	平潭县	3501280412P12	96	315.13	3501280412P12-021	119.752	25.4278	0	2.742	0.0177135	0.284992	1.81101	0.867382	-0.580788	1.63084	155	5.5355	4.48692	ENE	69	0.516718	1.358	4.653	3.88312	7.71525	3.8697	1.42553	1.30725	4.77472
											3501280412P12-022	119.752	25.4278	8.36	2.666
											3501280412P12-023	119.752	25.4278	15.83	2.585
											3501280412P12-024	119.752	25.4278	24.82	2.472
											3501280412P12-025	119.752	25.4278	32.93	2.363
											3501280412P12-026	119.752	25.4277	42.16	2.26
											3501280412P12-027	119.752	25.4277	50.34	2.144
											3501280412P12-028	119.752	25.4277	58.58	2.024
											3501280412P12-029	119.752	25.4277	68.05	1.912
											3501280412P12-030	119.752	25.4277	78.34	1.767
											3501280412P12-031	119.753	25.4277	86.81	1.662
											3501280412P12-032	119.753	25.4277	95.33	1.513
											3501280412P12-033	119.753	25.4277	103.12	1.377
											3501280412P12-034	119.753	25.4277	110.99	1.246
											3501280412P12-035	119.753	25.4277	119.79	1.067
											3501280412P12-036	119.753	25.4277	128.09	0.903
											3501280412P12-037	119.753	25.4277	135.54	0.714
											3501280412P12-038	119.753	25.4277	142.82	0.542
											3501280412P12-039	119.753	25.4276	150.01	0.373
											3501280412P12-040	119.753	25.4276	157.35	0.214
											3501280412P12-041	119.753	25.4276	163.88	0.045
											3501280412P12-042	119.753	25.4276	170.45	-0.136
											3501280412P12-043	119.753	25.4276	175.99	-0.239
											3501280412P12-044	119.754	25.4276	186.64	-0.473
											3501280412P12-045	119.754	25.4276	199.17	-0.786
19	无	有	3501280412	平潭县远垱澳沙滩	福建省	福州市	平潭县	3501280412P11	74	243.73	3501280412P11-014	119.753	25.4214	0	2.699	0.0189382	0.239135	2.0641	0.736973	-0.372028	1.43917	155	5.5355	4.48692	ENE	69	0.516718	1.358	4.653	3.88312	9.77615	3.05393	1.42553	1.30725	4.77472
											3501280412P11-015	119.753	25.4215	9.77	2.572
											3501280412P11-016	119.753	25.4215	20.26	2.452
											3501280412P11-017	119.753	25.4215	29.81	2.308
											3501280412P11-018	119.753	25.4215	39.51	2.171
											3501280412P11-019	119.753	25.4216	47.66	2.036
											3501280412P11-020	119.753	25.4216	57.14	1.886
											3501280412P11-021	119.753	25.4216	66.52	1.739
											3501280412P11-022	119.753	25.4216	76.08	1.56
											3501280412P11-023	119.753	25.4216	86.23	1.352
											3501280412P11-024	119.754	25.4217	96.49	1.127
											3501280412P11-025	119.754	25.4217	104.53	0.971
											3501280412P11-026	119.754	25.4217	111.59	0.828
											3501280412P11-027	119.754	25.4217	120.45	0.644
											3501280412P11-028	119.754	25.4218	129.36	0.433
											3501280412P11-029	119.754	25.4218	137.87	0.255
											3501280412P11-030	119.754	25.4218	146.58	0.068
											3501280412P11-031	119.754	25.4218	155.04	-0.116
											3501280412P11-032	119.754	25.4218	162.7	-0.263
											3501280412P11-033	119.754	25.4218	164.96	-0.316
											3501280412P11-034	119.754	25.4219	171.01	-0.647
											3501280412P11-035	119.754	25.4219	184.6	-0.797
20	无	有	3501280422	平潭县鸟仔磹沙滩	福建省	福州市	平潭县	3501280422P01	19	174.162	3501280422P01-015	119.757	25.4166	-0.004	2.685	0.026781	0.182522	2.45385	0.394289	-0.0715219	1.01749	155	5.5355	4.48692	ENE	69	0.516718	1.358	4.653	3.88312	14.4445	2.06692	1.42553	1.30725	4.77472
											3501280422P01-016	119.757	25.4166	2.953	2.462
											3501280422P01-017	119.757	25.4166	6.239	2.261
											3501280422P01-018	119.757	25.4167	9.269	2.047
											3501280422P01-019	119.757	25.4167	12.986	1.875
											3501280422P01-020	119.757	25.4167	17.772	1.774
											3501280422P01-021	119.757	25.4168	22.452	1.649
											3501280422P01-022	119.757	25.4168	25.815	1.591
											3501280422P01-023	119.757	25.4169	31.72	1.429
											3501280422P01-024	119.757	25.4169	38.691	1.266
											3501280422P01-025	119.757	25.417	50.378	1.017
											3501280422P01-026	119.757	25.4171	61.971	0.805
											3501280422P01-027	119.757	25.4172	71.557	0.621
											3501280422P01-028	119.757	25.4173	85.624	0.5
											3501280422P01-029	119.757	25.4174	93.235	0.304
											3501280422P01-030	119.757	25.4174	100.278	0.073
											3501280422P01-031	119.757	25.4175	107.211	-0.191
											3501280422P01-032	119.758	25.4176	115.86	-0.397
											3501280422P01-033	119.758	25.4176	123.964	-0.615
											3501280422P01-034	119.758	25.4177	135.558	-0.929
											3501280422P01-035	119.758	25.4178	142.452	-1.13
23	无	有	3501280472	平潭县东垄澳沙滩	福建省	福州市	平潭县	3501280472P10	205	142.61	3501280472P10-025	119.76	25.4013	0	2.761	0.0434099	0.220257	2.18274	0.962131	-0.529203	2.34006	156	5.53322	4.49213	ENE	64	0.510811	1.663	5.024	3.75744	11.6693	2.72084	1.4726	1.38134	4.63807
											3501280472P10-026	119.76	25.4013	1.6	2.578
											3501280472P10-027	119.76	25.4012	3.45	2.391
											3501280472P10-028	119.76	25.4012	5.19	2.24
											3501280472P10-029	119.76	25.4012	7.18	2.069
											3501280472P10-030	119.76	25.4012	9.58	1.878
											3501280472P10-031	119.76	25.4012	9.62	1.87
											3501280472P10-032	119.76	25.4012	11.54	1.729
											3501280472P10-033	119.76	25.4012	13.61	1.599
											3501280472P10-034	119.76	25.4011	16.07	1.46
											3501280472P10-035	119.76	25.4011	18.61	1.337
											3501280472P10-036	119.76	25.4011	21.76	1.2
											3501280472P10-037	119.76	25.4011	24.46	1.073
											3501280472P10-038	119.76	25.401	27.38	0.985
											3501280472P10-039	119.76	25.401	32.28	0.88
											3501280472P10-040	119.76	25.401	38.04	0.75
											3501280472P10-041	119.76	25.4009	42.76	0.616
											3501280472P10-042	119.76	25.4009	47.78	0.494
											3501280472P10-043	119.76	25.4009	48.52	0.473
											3501280472P10-044	119.76	25.4008	52.87	0.354
											3501280472P10-045	119.76	25.4008	57.89	0.248
25	无	有	3501280592	平潭县钟门下澳沙滩	福建省	福州市	平潭县	3501280592P01	296	66.33	3501280592P01-018	119.723	25.6314	0	2.68	0.106073	1.62366	-0.699246	0.832211	-0.00246706	0.92426	147	5.60574	4.55496	ENE	65	0.433182	1.149	5.043	4.58055	1.17559	23.2934	1.22381	1.11659	4.46916
											3501280592P01-019	119.723	25.6314	1.42	2.524
											3501280592P01-020	119.723	25.6315	2.8	2.384
											3501280592P01-021	119.723	25.6315	4.14	2.244
											3501280592P01-022	119.723	25.6315	5.56	2.146
											3501280592P01-023	119.723	25.6315	6.99	2.004
											3501280592P01-024	119.723	25.6315	8.54	1.825
											3501280592P01-025	119.723	25.6315	10.07	1.651
											3501280592P01-026	119.723	25.6315	10.06	1.606
											3501280592P01-027	119.723	25.6315	11.19	1.537
											3501280592P01-028	119.723	25.6315	12.35	1.42
											3501280592P01-029	119.723	25.6315	13.89	1.271
											3501280592P01-030	119.723	25.6315	15.4	1.123
											3501280592P01-031	119.723	25.6315	17.19	0.931
											3501280592P01-032	119.723	25.6315	18.53	0.797
											3501280592P01-033	119.723	25.6315	19.93	0.631
											3501280592P01-034	119.723	25.6315	21.59	0.5
											3501280592P01-035	119.723	25.6315	23.2	0.362
											3501280592P01-036	119.723	25.6315	24.74	0.189
											3501280592P01-037	119.723	25.6315	26.32	0.072
											3501280592P01-038	119.723	25.6316	27.97	-0.126
											3501280592P01-039	119.723	25.6316	29.55	-0.265
											3501280592P01-040	119.723	25.6316	31.09	-0.42
											3501280592P01-041	119.723	25.6316	32.6	-0.587
											3501280592P01-042	119.723	25.6316	34.28	-0.766
											3501280592P01-043	119.723	25.6316	36.04	-0.934
											3501280592P01-044	119.723	25.6316	37.76	-1.136
											3501280592P01-045	119.723	25.6316	39.59	-1.322
											3501280592P01-046	119.723	25.6316	42.03	-1.611
											3501280592P01-047	119.723	25.6316	43.84	-1.885
											3501280592P01-048	119.723	25.6316	45.61	-2.158
27	无	有	3501280632	平潭县东庠岛南模澳沙滩	福建省	福州市	平潭县	3501280652P01	176	110.42	3501280652P01-023	119.888	25.5896	0	2.735	0.0562059	0.212567	2.23401	0.391563	-0.113815	1.78825	152	5.54991	4.48337	NE	50	0.406814	1.916	4.992	3.47035	12.8315	2.58652	1.59924	1.50243	4.81859
											3501280652P01-024	119.888	25.5896	2.99	2.515
											3501280652P01-025	119.888	25.5895	5.78	2.295
											3501280652P01-026	119.888	25.5895	8.82	2.097
											3501280652P01-027	119.888	25.5895	12.02	1.901
											3501280652P01-028	119.888	25.5895	15.92	1.717
											3501280652P01-029	119.889	25.5894	19.11	1.551
											3501280652P01-030	119.889	25.5894	22.75	1.346
											3501280652P01-031	119.889	25.5894	25.65	1.191
											3501280652P01-032	119.889	25.5893	29.07	1.015
											3501280652P01-033	119.889	25.5893	33.19	0.799
											3501280652P01-034	119.889	25.5893	37.55	0.548
											3501280652P01-035	119.889	25.5892	40.84	0.362
											3501280652P01-036	119.889	25.5892	44.73	0.136
											3501280652P01-037	119.889	25.5892	48.13	-0.006
											3501280652P01-038	119.889	25.5891	51.04	-0.178
											3501280652P01-039	119.889	25.5891	54.98	-0.354
											3501280652P01-040	119.889	25.5891	59.46	-0.607
28	无	有	3501280712	平潭县塘屿中楼后澳沙滩	福建省	福州市	平潭县	3501280712P01	99	98.97	3501280712P01-018	119.693	25.333	0	2.709	0.0478281	0.280766	1.83256	0.940944	-0.66214	2.28657	156	5.53322	4.49213	ENE	64	0.510811	1.663	5.024	3.75744	8.36781	3.79435	1.4726	1.38134	4.63807
											3501280712P01-019	119.693	25.333	2.85	2.492
											3501280712P01-020	119.693	25.333	5.69	2.277
											3501280712P01-021	119.693	25.333	9.96	2.03
											3501280712P01-022	119.693	25.333	14.96	1.862
											3501280712P01-023	119.694	25.333	21.83	1.687
											3501280712P01-024	119.694	25.333	30.97	1.421
											3501280712P01-025	119.694	25.333	38.84	1.24
											3501280712P01-026	119.694	25.333	47.65	1.018
											3501280712P01-027	119.694	25.333	52.5	0.948
											3501280712P01-028	119.694	25.333	61.29	0.192
											3501280712P01-029	119.694	25.333	64.92	-0.396
29	无	有	3501280762	平潭县塘屿东猫尾沙滩	福建省	福州市	平潭县	3501280762P01	129	89.09	3501280762P01-019	119.69	25.3137	0	2.707	0.118128	1.73529	-0.795177	0.930861	0.19934	0.817074	158	5.55361	4.51268	ENE	68	0.509756	1.427	4.763	3.94928	1.21484	24.5718	1.40623	1.29385	4.71088
											3501280762P01-020	119.69	25.3137	2.19	2.428
											3501280762P01-021	119.69	25.3137	4.83	2.137
											3501280762P01-022	119.69	25.3137	7.04	1.823
											3501280762P01-023	119.69	25.3137	8.76	1.533
											3501280762P01-024	119.69	25.3137	10.93	1.278
											3501280762P01-025	119.69	25.3136	13	0.986
											3501280762P01-026	119.69	25.3136	15.22	0.732
											3501280762P01-027	119.69	25.3136	17.71	0.441
											3501280762P01-028	119.69	25.3136	19.86	0.231
											3501280762P01-029	119.69	25.3136	21.98	-0.008
											3501280762P01-030	119.69	25.3136	23.85	-0.214
											3501280762P01-031	119.69	25.3136	26.14	-0.454
											3501280762P01-032	119.69	25.3136	27.58	-0.584
											3501280762P01-033	119.69	25.3136	29.09	-0.685
											3501280762P01-034	119.69	25.3136	30.56	-0.903
30	无	有	3501810081	福清市东岐岬角沙滩	福建省	福州市	福清市	3501810051P01	26	145.2	3501810051P01-017	119.594	25.5902	0	2.799	0.0476196	0.939225	0.0904578	1.36678	0.253708	0.702783	148	5.60923	4.56875	NE	40	0.480013	0.501	3.701	9.77446	1.22862	14.4768	0.573866	0.509936	3.22642
											3501810051P01-018	119.594	25.5902	3.42	2.638
											3501810051P01-019	119.594	25.5902	6.21	2.391
											3501810051P01-020	119.594	25.5902	8.54	2.302
											3501810051P01-021	119.594	25.5903	10.96	2.183
											3501810051P01-022	119.594	25.5903	13.27	2.064
											3501810051P01-023	119.594	25.5903	16.34	1.868
											3501810051P01-024	119.594	25.5903	19.09	1.712
											3501810051P01-025	119.594	25.5904	23.11	1.477
											3501810051P01-026	119.594	25.5904	27.19	1.222
											3501810051P01-027	119.594	25.5904	31.25	1.045
											3501810051P01-028	119.594	25.5905	36.52	0.784
											3501810051P01-029	119.594	25.5905	41.94	0.502
											3501810051P01-030	119.594	25.5905	46.52	0.35
											3501810051P01-031	119.594	25.5906	52.36	0.098
											3501810051P01-032	119.594	25.5906	57.1	-0.087
											3501810051P01-033	119.594	25.5907	66.15	-0.465
											3501810051P01-034	119.594	25.5907	72.1	-0.718
											3501810051P01-035	119.594	25.5908	81.08	-1.062
31	无	有	3501810061	福清市门头澳沙滩	福建省	福州市	福清市	3501810071P01	22	88.55	3501810071P01-013	119.577	25.5834	0	2.616	0.0577945	1.33454	-0.416346	1.02498	0.0198991	0.894025	148	5.60923	4.56875	NE	40	0.480013	0.501	3.701	9.77446	0.898613	19.7932	0.573866	0.509936	3.22642
											3501810071P01-014	119.577	25.5834	1.71	2.444
											3501810071P01-015	119.577	25.5834	4.26	2.188
											3501810071P01-016	119.577	25.5834	6.44	1.961
											3501810071P01-017	119.577	25.5835	9.1	1.672
											3501810071P01-018	119.577	25.5835	11.29	1.498
											3501810071P01-019	119.577	25.5835	14.19	1.25
											3501810071P01-020	119.577	25.5835	17.77	1.065
											3501810071P01-021	119.577	25.5836	21.15	0.848
											3501810071P01-022	119.577	25.5836	24.27	0.654
											3501810071P01-023	119.577	25.5836	27.53	0.48
											3501810071P01-024	119.577	25.5837	32.18	0.213
											3501810071P01-025	119.577	25.5837	37.62	-0.149
											3501810071P01-026	119.577	25.5838	44.66	-0.538
											3501810071P01-027	119.577	25.5839	55.61	-1.011
											3501810071P01-028	119.577	25.5839	66.61	-1.38
											3501810071P01-029	119.577	25.584	73	-1.603
32	无	有	3501810101	福清市北楼村沙滩	福建省	福州市	福清市	3501810101P01	57	250.89	3501810101P01-009	119.606	25.5624	-0.004	2.628	0.0170254	0.47839	1.06374	1.62216	0.213646	1.27782	149	5.60573	4.56017	NNE	21	0.398481	0.583	2.569	11.8553	2.57188	7.25967	0.472847	0.451843	2.53251
											3501810101P01-010	119.606	25.5624	1.464	2.437
											3501810101P01-011	119.606	25.5624	3.145	2.244
											3501810101P01-012	119.606	25.5624	5.383	1.995
											3501810101P01-013	119.606	25.5624	8.449	1.71
											3501810101P01-014	119.606	25.5624	7.483	1.771
											3501810101P01-015	119.606	25.5624	10.19	1.57
											3501810101P01-016	119.606	25.5625	14.563	1.292
											3501810101P01-017	119.606	25.5625	19.834	1.067
											3501810101P01-018	119.606	25.5625	25.39	0.851
											3501810101P01-019	119.606	25.5625	29.178	0.685
											3501810101P01-020	119.606	25.5625	33.957	0.476
											3501810101P01-021	119.606	25.5626	44.877	0.09
											3501810101P01-022	119.606	25.5626	46.674	0.081
											3501810101P01-023	119.606	25.5627	63.606	-0.153
											3501810101P01-024	119.607	25.5628	79.664	-0.218
											3501810101P01-025	119.607	25.5628	85.332	-0.213
											3501810101P01-026	119.607	25.563	125.407	-0.42
											3501810101P01-027	119.607	25.5631	154.806	-0.64
											3501810101P01-028	119.607	25.5632	169.535	-0.7
											3501810101P01-029	119.607	25.5633	191.327	-0.883
											3501810101P01-030	119.608	25.5635	231.36	-1.311
34	无	有	3501810171	福清市牛山沙滩	福建省	福州市	福清市	3501810161P01	93	52.303	3501810161P01-008	119.651	25.402	0	2.508	0.104967	1.28086	-0.357117	0.93653	-0.0774765	0.785472	150	5.58365	4.53694	ENE	68	0.1946	0.715	3.028	9.36958	0.996708	19.111	0.595935	0.54286	3.12858
											3501810161P01-009	119.651	25.402	2.9	2.133
											3501810161P01-010	119.651	25.402	5.59	1.835
											3501810161P01-011	119.651	25.402	8.48	1.514
											3501810161P01-012	119.651	25.402	10.96	1.161
											3501810161P01-013	119.651	25.402	13.99	0.765
											3501810161P01-014	119.651	25.402	17.42	0.394
											3501810161P01-015	119.651	25.402	20.9	0.016
											3501810161P01-016	119.651	25.402	24.05	-0.309
											3501810161P01-017	119.651	25.402	27.38	-0.603
											3501810161P01-018	119.651	25.402	30.93	-0.827
											3501810161P01-019	119.651	25.402	33.98	-1.104
											3501810161P01-020	119.651	25.402	36.01	-1.273
											3501810161P01-021	119.651	25.402	36.61	-1.356
											3501810161P01-022	119.651	25.402	37.65	-1.444
36	无	有	3501810211	福清市小峰东村沙滩	福建省	福州市	福清市	3501810201P01	180	118.32	3501810201P01-018	119.622	25.3437	0	2.656	0.095514	0.672616	0.572144	1.25728	-0.139286	1.33268	159	5.58313	4.54655	ENE	67	0.408712	1.066	3.55	6.0323	2.39541	10.454	0.925539	0.865943	3.69601
											3501810201P01-019	119.622	25.3437	1.67	2.423
											3501810201P01-020	119.622	25.3436	3.05	2.224
											3501810201P01-021	119.622	25.3436	4.57	1.996
											3501810201P01-022	119.622	25.3436	6.06	1.797
											3501810201P01-023	119.622	25.3436	7.43	1.572
											3501810201P01-024	119.622	25.3436	9.02	1.37
											3501810201P01-025	119.622	25.3436	10.55	1.155
											3501810201P01-026	119.622	25.3436	12.13	0.916
											3501810201P01-027	119.622	25.3435	13.95	0.666
											3501810201P01-028	119.622	25.3435	15.64	0.433
											3501810201P01-029	119.622	25.3435	17.43	0.191
											3501810201P01-030	119.622	25.3435	19.31	-0.062
											3501810201P01-031	119.622	25.3435	21.06	-0.295
											3501810201P01-032	119.622	25.3435	22.98	-0.517
											3501810201P01-033	119.622	25.3434	24.83	-0.754
											3501810201P01-034	119.622	25.3434	27.5	-0.913
											3501810201P01-035	119.622	25.3434	29.72	-1.147
											3501810201P01-036	119.622	25.3434	32.22	-1.408
											3501810201P01-037	119.622	25.3434	35.05	-1.737
											3501810201P01-038	119.622	25.3433	36.98	-1.907
											3501810201P01-039	119.622	25.3433	41.6	-2.261
											3501810201P01-040	119.622	25.3432	48.55	-2.317
											3501810201P01-041	119.622	25.3432	53.5	-2.454
40	无	有	3501810331	福清市西岐岬角沙滩	福建省	福州市	福清市	3501810321P01	231	95.08	3501810321P01-011	119.485	25.3672	0	2.57	0.0662437	1.3719	-0.456176	1.28533	-0.454176	0.520991	160	5.60927	4.57409	NE	46	0.272334	0.762	2.792	8.88639	1.03593	20.2622	0.63122	0.594985	3.00723
											3501810321P01-012	119.485	25.3672	2.18	2.358
											3501810321P01-013	119.485	25.3672	6.49	2.037
											3501810321P01-014	119.485	25.3672	8.8	1.853
											3501810321P01-015	119.485	25.367	29.59	0.201
											3501810321P01-016	119.485	25.367	29.7	0.149
											3501810321P01-017	119.485	25.367	30.99	0.031
											3501810321P01-018	119.485	25.367	32.48	-0.084
											3501810321P01-019	119.485	25.367	33.19	-0.16
											3501810321P01-020	119.485	25.367	34.69	-0.312
											3501810321P01-021	119.485	25.367	36.47	-0.511
											3501810321P01-022	119.484	25.3669	52.79	-1.386
											3501810321P01-023	119.484	25.3669	58.63	-1.529
											3501810321P01-024	119.484	25.3668	63.84	-1.659
43	无	有	3503050051	莆田市汀港村沙滩	福建省	莆田市	秀屿区	3503050051P01	35	213.94	3503050051P01-022	119.306	25.3	0	2.604	0.0249608	1.11294	-0.154382	0.788715	-0.37471	0.984532	162	5.61117	4.58124	NE	44	0.317793	0.611	2.585	12.9369	0.951293	16.8984	0.433734	0.392971	2.69813
											3503050051P01-023	119.306	25.3	2.31	2.325
											3503050051P01-024	119.306	25.3	4.44	2.108
											3503050051P01-025	119.306	25.3	6.42	1.935
											3503050051P01-026	119.306	25.3	9.09	1.695
											3503050051P01-027	119.306	25.3001	11.94	1.485
											3503050051P01-028	119.306	25.3001	15.87	1.291
											3503050051P01-029	119.306	25.3001	20.51	1.107
											3503050051P01-030	119.306	25.3002	25.57	1.02
											3503050051P01-031	119.306	25.3002	31.77	0.89
											3503050051P01-032	119.307	25.3003	39.4	0.699
											3503050051P01-033	119.307	25.3003	48.14	0.478
											3503050051P01-034	119.307	25.3004	57.33	0.168
											3503050051P01-035	119.307	25.3005	66.2	-0.013
											3503050051P01-036	119.307	25.3005	76.17	-0.166
											3503050051P01-037	119.307	25.3006	83.15	-0.278
											3503050051P01-038	119.307	25.3006	91.91	-0.397
											3503050051P01-039	119.307	25.3007	99.57	-0.55
											3503050051P01-040	119.307	25.3008	107.42	-0.724
											3503050051P01-041	119.307	25.3008	115.26	-0.901
											3503050051P01-042	119.307	25.3009	124.95	-1.092
											3503050051P01-043	119.307	25.301	134.94	-1.236
											3503050051P01-044	119.307	25.301	145.22	-1.363
											3503050051P01-045	119.307	25.3011	154.83	-1.453
											3503050051P01-046	119.307	25.3012	165.94	-1.538
49	无	有	3503050192	莆田市南日岛东户村沙滩	福建省	莆田市	秀屿区	3503050212P01	219	135.53	3503050212P01-022	119.518	25.1711	0	2.804	0.0604062	0.255952	1.96606	1.13495	-0.504753	2.16318	166	5.59877	4.56325	ENE	68	0.263052	0.899	3.395	6.22769	7.13886	3.35251	0.899012	0.828297	3.75636
											3503050212P01-023	119.518	25.1711	1.66	2.588
											3503050212P01-024	119.518	25.1711	3.14	2.41
											3503050212P01-025	119.518	25.171	5.13	2.21
											3503050212P01-026	119.518	25.171	7.6	2.07
											3503050212P01-027	119.518	25.171	10.71	1.911
											3503050212P01-028	119.518	25.171	12.47	1.802
											3503050212P01-029	119.518	25.171	15.34	1.644
											3503050212P01-030	119.518	25.171	18.7	1.473
											3503050212P01-031	119.518	25.1709	23.21	1.216
											3503050212P01-032	119.518	25.1709	27.38	0.989
											3503050212P01-033	119.518	25.1709	31.24	0.796
											3503050212P01-034	119.518	25.1708	34.62	0.637
											3503050212P01-035	119.518	25.1708	38.65	0.42
											3503050212P01-036	119.518	25.1708	41.85	0.276
52	无	有	3503050311	莆田市尖山脚村沙滩	福建省	莆田市	秀屿区	3503050311P01	154	126.05	3503050311P01-014	119.31	25.2418	0	2.711	0.0556451	0.351825	1.50707	0.828827	-0.0732624	0.798606	165	5.6136	4.57581	NE	48	0.326864	0.705	2.918	7.69681	4.24404	5.05821	0.729341	0.670577	3.39746
											3503050311P01-015	119.31	25.2418	1.25	2.511
											3503050311P01-016	119.31	25.2418	2.6	2.319
											3503050311P01-017	119.31	25.2417	3.96	2.102
											3503050311P01-018	119.31	25.2417	5.28	1.888
											3503050311P01-019	119.31	25.2417	6.58	1.695
											3503050311P01-020	119.31	25.2417	7.89	1.538
											3503050311P01-021	119.31	25.2417	9.45	1.379
											3503050311P01-022	119.31	25.2417	11.33	1.193
											3503050311P01-023	119.31	25.2417	12.86	1.057
											3503050311P01-024	119.31	25.2416	15.25	0.928
											3503050311P01-025	119.31	25.2416	18.69	0.769
											3503050311P01-026	119.31	25.2416	21.58	0.602
											3503050311P01-027	119.31	25.2416	27.15	0.31
											3503050311P01-028	119.31	25.2415	31.49	0.104
											3503050311P01-029	119.31	25.2415	36.83	-0.171
											3503050311P01-030	119.31	25.2414	41.93	-0.388
											3503050311P01-031	119.31	25.2414	47.3	-0.629
											3503050311P01-032	119.31	25.2414	51.38	-0.764
											3503050311P01-033	119.31	25.2413	55.86	-0.928
											3503050311P01-034	119.31	25.2413	60.31	-1.091
											3503050311P01-035	119.31	25.2413	64.48	-1.236
											3503050311P01-036	119.31	25.2412	68.62	-1.39
											3503050311P01-037	119.31	25.2412	72.19	-1.537
											3503050311P01-038	119.31	25.2412	74.58	-1.604
											3503050311P01-039	119.31	25.2411	79.91	-1.795
											3503050311P01-040	119.311	25.2411	83.17	-1.917
53	无	有	3503050321	莆田市卓东村沙滩	福建省	莆田市	秀屿区	3503050321P01	108	231.66	3503050321P01-026	119.289	25.2251	0.004	2.809	0.030479	0.408481	1.29166	1.00531	-0.129059	1.00872	165	5.6136	4.57581	NE	48	0.326864	0.705	2.918	7.69681	3.54606	6.05383	0.729341	0.670577	3.39746
											3503050321P01-027	119.289	25.2251	3.274	2.333
											3503050321P01-028	119.289	25.2251	6.264	1.954
											3503050321P01-029	119.289	25.2251	9.154	1.631
											3503050321P01-030	119.289	25.2251	12.744	1.237
											3503050321P01-031	119.289	25.2251	15.294	1.148
											3503050321P01-032	119.289	25.2251	22.394	1.07
											3503050321P01-033	119.289	25.2251	28.584	0.936
											3503050321P01-034	119.289	25.225	36.644	0.79
											3503050321P01-035	119.289	25.225	44.914	0.607
											3503050321P01-036	119.289	25.225	53.074	0.431
											3503050321P01-037	119.289	25.225	61.554	0.269
											3503050321P01-038	119.289	25.225	65.974	0.173
											3503050321P01-039	119.289	25.2249	76.944	-0.08
											3503050321P01-040	119.289	25.2249	86.634	-0.357
											3503050321P01-041	119.289	25.2249	94.394	-0.605
											3503050321P01-042	119.289	25.2249	102.964	-0.846
											3503050321P01-043	119.29	25.2248	117.214	-1.215
											3503050321P01-044	119.29	25.2248	128.564	-1.451
											3503050321P01-045	119.29	25.2247	144.654	-1.765
											3503050321P01-046	119.29	25.2247	164.124	-2.23
											3503050321P01-047	119.29	25.2247	173.824	-2.496
											3503050321P01-048	119.29	25.2247	176.384	-2.567
64	无	有	3505210161	惠安县崇武海滨森林公园沙滩	福建省	泉州市	惠安县	3505210161P02	83	224.6	3505210161P02-022	118.907	24.9218	0	2.633	0.021472	0.310866	1.68563	0.59617	-0.215746	0.980161	173	5.47241	4.44759	E	85	0.446366	1.25	5.023	5.12909	5.41383	4.33083	1.06694	0.93219	4.55054
											3505210161P02-023	118.907	24.9218	1.88	2.356
											3505210161P02-024	118.907	24.9218	6.99	2.169
											3505210161P02-025	118.907	24.9218	13.77	2.031
											3505210161P02-026	118.908	24.9218	26.18	1.848
											3505210161P02-027	118.908	24.9218	37.45	1.612
											3505210161P02-028	118.908	24.9218	47.31	1.467
											3505210161P02-029	118.908	24.9218	57.93	1.429
											3505210161P02-030	118.908	24.9218	71.99	1.248
											3505210161P02-031	118.908	24.9218	89.81	0.955
											3505210161P02-032	118.908	24.9219	111.32	0.461
											3505210161P02-033	118.909	24.9219	130.97	-0.009
											3505210161P02-034	118.909	24.9219	151.91	-0.556
											3505210161P02-035	118.909	24.9219	167.68	-0.942
											3505210161P02-036	118.909	24.9219	187.64	-1.396
65	无	有	3505210171	惠安县溪底村沙滩	福建省	泉州市	惠安县	3505210171P01	61	446.24	3505210171P01-016	118.921	24.9064	0	2.585	0.0126715	0.160656	2.63796	0.701553	-0.410646	2.8667	173	5.47241	4.44759	E	85	0.446366	1.25	5.023	5.12909	13.797	1.69939	1.06694	0.93219	4.55054
											3505210171P01-017	118.921	24.9064	13.61	2.348
											3505210171P01-018	118.921	24.9065	27.97	2.158
											3505210171P01-019	118.922	24.9066	53.33	1.816
											3505210171P01-020	118.922	24.9067	82.55	1.416
											3505210171P01-021	118.922	24.9068	107.41	1.05
											3505210171P01-022	118.922	24.9069	133.43	0.691
											3505210171P01-023	118.922	24.9071	163.22	0.288
											3505210171P01-024	118.923	24.9072	196.2	-0.116
											3505210171P01-025	118.923	24.9073	223.89	-0.524
											3505210171P01-026	118.923	24.9075	254.29	-0.907
											3505210171P01-027	118.923	24.9076	277.61	-1.223
											3505210171P01-028	118.924	24.9077	305.85	-1.516
											3505210171P01-029	118.924	24.9078	337.96	-1.75
											3505210171P01-030	118.924	24.908	366.43	-2.021
											3505210171P01-031	118.924	24.908	383.67	-2.165
											3505210171P01-032	118.924	24.908	384.49	-2.243
											3505210171P01-033	118.924	24.9081	391.51	-2.376
66	无	有	3505210181	惠安县峰上村沙滩	福建省	泉州市	惠安县	3505210181P01	42	409.26	3505210181P01-014	118.926	24.9008	0	2.744	0.0127532	0.785975	0.347444	1.38056	-0.304933	0.772526	173	5.47241	4.44759	E	85	0.446366	1.25	5.023	5.12909	1.91982	12.2128	1.06694	0.93219	4.55054
											3505210181P01-015	118.926	24.9008	2.4	2.546
											3505210181P01-016	118.926	24.9008	3.98	2.373
											3505210181P01-017	118.926	24.9008	8.29	2.126
											3505210181P01-018	118.926	24.9009	23.43	1.849
											3505210181P01-019	118.926	24.9011	51.62	1.365
											3505210181P01-020	118.926	24.9013	76.91	0.901
											3505210181P01-021	118.927	24.9015	101.93	0.567
											3505210181P01-022	118.927	24.9017	140.66	0.086
											3505210181P01-023	118.927	24.902	178	-0.289
											3505210181P01-024	118.927	24.9025	248.83	-1.018
											3505210181P01-025	118.928	24.9027	283.92	-1.334
											3505210181P01-026	118.928	24.9031	343.14	-1.798
											3505210181P01-027	118.928	24.9032	360.85	-1.858
72	无	有	3505210261	惠安县崇武古城沙滩	福建省	泉州市	惠安县	3505210261P01	155	93.06	3505210261P01-019	118.931	24.8761	0	2.652	0.0779172	0.98927	0.0155638	0.444145	-0.110871	1.04234	174	5.37108	4.36204	E	91	0.552051	0.785	4.572	5.8903	1.29516	15.1887	0.911853	0.758977	4.63533
											3505210261P01-020	118.931	24.8761	1.54	2.404
											3505210261P01-021	118.931	24.8761	2.43	2.189
											3505210261P01-022	118.931	24.8761	3.72	2.013
											3505210261P01-023	118.931	24.8761	4.95	1.841
											3505210261P01-024	118.931	24.876	6.35	1.595
											3505210261P01-025	118.931	24.876	7.9	1.376
											3505210261P01-026	118.931	24.876	9.71	1.101
											3505210261P01-027	118.931	24.876	11.69	0.832
											3505210261P01-028	118.931	24.876	13.42	0.527
											3505210261P01-029	118.931	24.876	14.82	0.34
											3505210261P01-030	118.931	24.876	16.27	0.173
											3505210261P01-031	118.931	24.876	17.68	-0.028
											3505210261P01-032	118.931	24.8759	19.33	-0.229
											3505210261P01-033	118.931	24.8759	20.85	-0.413
											3505210261P01-034	118.931	24.8759	23.85	-0.774
											3505210261P01-035	118.931	24.8757	53.92	-2.243
											3505210261P01-036	118.931	24.8756	64.53	-2.376
80	无	有	3505210341	惠安县玉霞村沙滩	福建省	泉州市	惠安县	3505210341P01	153	181.54	3505210341P01-014	118.783	24.8609	0	2.542	0.0237591	0.562128	0.831029	0.815055	-0.189396	1.25029	175	5.29862	4.30395	E	96	0.347748	5.196	4.228	6.23418	2.00096	8.66558	0.84993	0.675955	4.90171
											3505210341P01-015	118.783	24.8609	1.55	2.373
											3505210341P01-016	118.783	24.8609	3.65	2.172
											3505210341P01-017	118.783	24.8609	5.78	1.984
											3505210341P01-018	118.783	24.8609	8.38	1.815
											3505210341P01-019	118.783	24.8609	11.1	1.665
											3505210341P01-020	118.783	24.8609	12.12	1.602
											3505210341P01-021	118.783	24.8608	15.55	1.398
											3505210341P01-022	118.783	24.8608	18.94	1.229
											3505210341P01-023	118.783	24.8608	22.8	1.06
											3505210341P01-024	118.783	24.8607	27.02	0.897
											3505210341P01-025	118.783	24.8607	31.77	0.752
											3505210341P01-026	118.783	24.8607	36.65	0.593
											3505210341P01-027	118.783	24.8606	44.05	0.363
											3505210341P01-028	118.784	24.8605	51.52	0.14
											3505210341P01-029	118.784	24.8605	60.24	-0.12
											3505210341P01-030	118.784	24.8604	70.7	-0.351
											3505210341P01-031	118.784	24.8602	87.22	-0.56
											3505210341P01-032	118.784	24.8601	103.04	-0.643
											3505210341P01-033	118.784	24.8599	133.36	-0.996
											3505210341P01-034	118.784	24.8597	152.91	-1.091
90	无	有	3505820011	晋江市深沪湾沙滩	福建省	泉州市	晋江市	3505820011P02	105	199.94	3505820011P02-018	118.645	24.6623	0	2.424	0.0166087	0.513705	0.960988	0.592114	-0.234867	0.933155	177	5.13989	4.17062	E	85	0.47611	1.307	5.508	4.6288	2.85575	7.8577	1.11041	0.939688	4.94846
											3505820011P02-019	118.645	24.6623	2.19	2.123
											3505820011P02-020	118.645	24.6623	4.48	1.813
											3505820011P02-021	118.645	24.6623	6.99	1.562
											3505820011P02-022	118.645	24.6623	9.32	1.288
											3505820011P02-023	118.645	24.6623	11.81	1.05
											3505820011P02-024	118.645	24.6623	14.15	0.855
											3505820011P02-025	118.645	24.6622	22.07	0.972
											3505820011P02-026	118.645	24.6622	44.55	0.77
											3505820011P02-027	118.646	24.6621	74.76	0.612
											3505820011P02-028	118.646	24.6621	101.63	0.345
											3505820011P02-029	118.646	24.662	125.95	0.093
											3505820011P02-030	118.646	24.6619	149.44	-0.058
95	无	有	3505820091	晋江市月亮湾沙滩	福建省	泉州市	晋江市	3505820091P01	228	80.6	3505820091P01-013	118.571	24.5145	0	2.402	0.0609562	0.509491	0.97287	0.323835	0.143467	0.753154	179	4.90966	3.99112	E	88	0.583483	0.976	5.003	5.04372	2.62015	7.78668	0.973421	0.81176	4.77114
											3505820091P01-014	118.571	24.5145	1.95	2.207
											3505820091P01-015	118.571	24.5145	4.12	2.006
											3505820091P01-016	118.571	24.5145	5.9	1.87
											3505820091P01-017	118.571	24.5144	7.96	1.745
											3505820091P01-018	118.571	24.5144	10.3	1.541
											3505820091P01-019	118.571	24.5144	12.22	1.374
											3505820091P01-020	118.571	24.5144	14.67	1.261
											3505820091P01-021	118.571	24.5144	16.76	1.102
											3505820091P01-022	118.571	24.5144	19.68	0.913
											3505820091P01-023	118.571	24.5144	22.36	0.791
											3505820091P01-024	118.571	24.5143	25.29	0.641
											3505820091P01-025	118.571	24.5143	28.33	0.491
											3505820091P01-026	118.571	24.5143	33.05	0.237
											3505820091P01-027	118.571	24.5143	37.69	-0.026
											3505820091P01-028	118.571	24.5142	42.28	-0.289
											3505820091P01-029	118.571	24.5142	47.06	-0.514
											3505820091P01-030	118.57	24.5142	51.34	-0.779
											3505820091P01-031	118.57	24.5142	54.86	-0.972
											3505820091P01-032	118.57	24.5141	57.73	-1.117

## Sheet: Sheet1
反射型	低潮阶地/裂流型
过渡型	低潮阶地型
耗散型	低潮沙坝/裂流型
	无沙坝耗散型
	完全耗散型
