# Supplementary material
Source: ML conference proceedings conference paper supplement (https://openreview.net/forum?id=Cug26Y0RlT)
Supplement: supplementary_material [file beachdata2.xlsx]

## Sheet: 无海堤
序号	有无海堤	有无干滩	沙滩代码	沙滩名称	地理位置			剖面号	剖面方位角(º)	剖面长度(m)	测点号	地理坐标		与起点距离x(m)	平均海平面y(m)	海滩坡度m	平均粒径(mm)	粒度系数(φ)				对应潮汐点位序号	年平均大潮潮差(m)	年平均潮差(m)	主波向数据					相对潮差RTR	无量纲沉降速率Ω	高潮泥沙沉降速度(ωs)	破波波高Hb(m)	深水波波高Hd(m)	年平均周期(s)
					省	市	区(县)					经度(º)	纬度(º)					平均粒径(Mz)	分选系数(δ)	偏态(Sk)	峰态(Kg)				主波向度数（°）	主波向	频率	平均波高(m）	周期(s)
9	无	有	1302090012	唐山市龙岛沙滩	河北省	唐山市	曹妃甸区	1302090012P01	184	142.02	1302090012P01-006	118.736	39.0212	30.6155	0.865	0.0128573	0.106653	3.229	0.07518	0.2005	1.128	27	1.74431	1.3687	66	ENE	0.228457	0.973219	3.95214	2.42041	25.5333	0.867903	0.720667	0.675231	3.25205
											1302090012P01-007	118.736	39.0212	33.7947	0.668
											1302090012P01-008	118.736	39.0211	39.5395	0.515
											1302090012P01-009	118.736	39.0211	47.0599	0.431
											1302090012P01-010	118.736	39.021	55.4703	0.445
											1302090012P01-011	118.736	39.0209	64.674	0.22
											1302090012P01-012	118.736	39.0208	72.3511	0.021
											1302090012P01-013	118.736	39.0208	79.0849	-0.22
											1302090012P01-014	118.736	39.0207	83.3608	-0.568
											1302090012P01-015	118.736	39.0207	91.4562	-0.667
											1302090012P01-016	118.736	39.0206	95.3291	-0.33
											1302090012P01-017	118.736	39.0205	106.114	-0.215
											1302090012P01-018	118.736	39.0204	118.653	-0.441
											1302090012P01-019	118.736	39.0203	128.978	-0.561
											1302090012P01-020	118.736	39.0203	135.37	-0.785
											1302090012P01-021	118.736	39.0202	139.261	-0.892
											1302090012P01-022	118.736	39.0202	142.02	-0.961
9	无	有	1302090012	唐山市龙岛沙滩	河北省	唐山市	曹妃甸区	1302090012P02	129	55.44	1302090012P02-009	118.725	39.016	31.2414	1.007	0.0276346	0.151249	2.725	0.06554	0.1553	1.064	27	1.74431	1.3687	66	ENE	0.228457	0.973219	3.95214	2.42041	14.3261	1.54686	0.720667	0.675231	3.25205
											1302090012P02-010	118.725	39.0159	36.8225	0.735
											1302090012P02-011	118.725	39.0159	39.8439	0.586
											1302090012P02-012	118.725	39.0159	45.5345	0.249
											1302090012P02-013	118.725	39.0158	49.5942	-0.057
											1302090012P02-014	118.725	39.0158	51.8056	-0.285
											1302090012P02-015	118.725	39.0158	53.7415	-0.438
											1302090012P02-016	118.725	39.0158	55.4378	-0.525
10	无	有	3710030041	威海南辛庄沙滩	山东省	威海市	文登区	3710030041P01	178	44	3710030041P01-011	122.086	36.9211	0	1.098	0.0474127	0.870551	0.2	-0.35	2.39	-0.47	54	2.26018	1.74598	156	SSE	0.230566	0.683808	5.14808	3.08847	1.3969	13.4776	0.731812	0.629581	3.88705
											3710030041P01-012	122.086	36.9211	1.076	1.05
											3710030041P01-013	122.086	36.921	3.4451	0.758
											3710030041P01-014	122.086	36.921	4.8082	0.635
											3710030041P01-015	122.086	36.921	7.628	0.243
											3710030041P01-016	122.086	36.921	10.3957	-0.151
											3710030041P01-017	122.086	36.921	11.0655	-0.19
											3710030041P01-018	122.086	36.9209	13.4998	-0.241
											3710030041P01-019	122.086	36.9209	18.5282	-0.298
											3710030041P01-020	122.086	36.9209	22.5184	-0.245
											3710030041P01-021	122.086	36.9208	27.2386	-0.347
											3710030041P01-022	122.086	36.9208	30.224	-0.335
12	无	有	3706870061	烟台远牛沙滩	山东省	烟台市	海阳市	3706870061P01	102	82.6126	3706870061P01-018	121.36	36.7186	0	1.47	0.0548651	0.343885	1.54	1.52	0.4	2.08	57	2.71988	2.14128	157	SSE	0.213901	0.669714	4.32415	4.12189	3.63593	4.91767	0.659863	0.567728	3.69044
											3706870061P01-019	121.36	36.7186	2.8641	1.255
											3706870061P01-020	121.36	36.7185	7.314	0.87
											3706870061P01-021	121.36	36.7185	9.2831	0.668
											3706870061P01-022	121.36	36.7185	11.3345	0.506
											3706870061P01-023	121.36	36.7185	13.8336	0.34
											3706870061P01-024	121.36	36.7185	16.9931	0.132
											3706870061P01-025	121.36	36.7184	20.2705	-0.071
											3706870061P01-026	121.36	36.7184	23.7033	-0.433
											3706870061P01-027	121.36	36.7184	26.3349	-0.477
											3706870061P01-028	121.36	36.7184	29.1554	-0.489
											3706870061P01-029	121.36	36.7184	31.5242	-0.508
											3706870061P01-030	121.36	36.7183	34.7539	-0.554
											3706870061P01-031	121.36	36.7183	37.1821	-0.57
3	无	有	3309030202	舟山市普陀山岛千步沙沙滩	浙江省	舟山市	普陀区	3309030202P01	110.9	30.866	3309030202P01-029	122.39	29.9999	0	2.018	0.0589646	0.167241	2.58	0.44	-0.2	1.38	119	4.07784	3.01842	159	SSE	0.139015	1.2053	4.48429	3.16348	14.1948	1.80976	1.28903	1.12444	5.01783
											3309030202P01-030	122.39	29.9999	3.34623	1.719
											3309030202P01-031	122.39	29.9999	7.08173	1.409
											3309030202P01-032	122.39	29.9999	10.389	1.17
											3309030202P01-033	122.39	29.9999	13.9336	0.994
											3309030202P01-034	122.39	29.9999	17.1596	0.843
											3309030202P01-035	122.39	29.9999	19.598	0.725
											3309030202P01-036	122.391	29.9999	22.9744	0.572
											3309030202P01-037	122.391	29.9999	25.9409	0.432
											3309030202P01-038	122.391	29.9998	28.2405	0.338
											3309030202P01-039	122.391	29.9998	30.866	0.198
9	无	有	3509210151	霞浦县闾峡港沙滩	福建省	宁德市	霞浦县	3509210151P02	60	156.103	3509210151P02-019	120.10531835	26.64318976	0	2.414	0.0363899	0.570382	0.81	1.36	0.13	0.79	135	5.29622	4.22364	73	ENE	0.323278	1.05656	4.33407	4.89806	2.5581	8.80164	1.08129	0.922698	4.80242
											3509210151P02-020	120.10533588	26.64319886	2.01621	2.161
											3509210151P02-021	120.10534998	26.64320607	3.63125	2.015
											3509210151P02-022	120.10537766	26.64322064	6.82515	1.819
											3509210151P02-023	120.10541474	26.64323979	11.0829	1.446
											3509210151P02-024	120.10544242	26.64325386	14.2488	1.094
											3509210151P02-025	120.10551122	26.64328989	22.1775	0.751
											3509210151P02-026	120.10555611	26.64331287	27.3215	0.561
											3509210151P02-027	120.10563350	26.64335301	36.2182	0.14
											3509210151P02-028	120.10569928	26.64338700	43.7735	-0.152
											3509210151P02-029	120.10577685	26.64342710	52.6829	-0.427
											3509210151P02-030	120.10588514	26.64348361	65.1515	-0.763
											3509210151P02-031	120.10597082	26.64352753	74.9726	-0.994
											3509210151P02-032	120.10606392	26.64357598	85.6844	-1.226
											3509210151P02-033	120.10616210	26.64362681	96.9654	-1.445
											3509210151P02-034	120.10619772	26.64364495	101.042	-1.535
											3509210151P02-035	120.10624574	26.64366999	106.571	-1.655
											3509210151P02-036	120.10633474	26.64371596	116.791	-1.836
1	无	有	3501280182	平潭县长江澳沙滩	福建省	福州市	平潭县	3501280182P40	58	339.74	3501280182P40-054	119.775	25.6225	0	2.834	0.0176351	0.451316	1.14779	0.960301	-0.185229	0.657211	151	5.58227	4.52	50	NE	0.36589	1.641	4.689	3.92577	4.47122	6.79585	1.42196	1.31632	4.67968
											3501280182P40-055	119.775	25.6225	5.21	2.722
											3501280182P40-056	119.775	25.6225	10.11	2.628
											3501280182P40-057	119.776	25.6225	14.97	2.536
											3501280182P40-058	119.776	25.6226	20.27	2.427
											3501280182P40-059	119.776	25.6226	25.18	2.289
											3501280182P40-060	119.776	25.6226	29.96	2.175
											3501280182P40-061	119.776	25.6226	34.84	2.057
											3501280182P40-062	119.776	25.6227	39.89	1.928
											3501280182P40-063	119.776	25.6227	45.02	1.896
											3501280182P40-064	119.776	25.6227	50.07	1.775
											3501280182P40-065	119.776	25.6227	55.36	1.679
											3501280182P40-066	119.776	25.6228	60.86	1.584
											3501280182P40-067	119.776	25.6228	66.35	1.494
											3501280182P40-068	119.776	25.6228	71.76	1.416
											3501280182P40-069	119.776	25.6228	76.91	1.341
											3501280182P40-070	119.776	25.6229	83.46	1.239
											3501280182P40-071	119.776	25.6229	89.21	1.054
											3501280182P40-072	119.776	25.6229	94.84	1.028
											3501280182P40-073	119.776	25.6229	100.6	0.936
											3501280182P40-074	119.776	25.623	106.24	0.841
											3501280182P40-075	119.776	25.623	111.86	0.734
											3501280182P40-076	119.776	25.623	117.01	0.662
											3501280182P40-077	119.776	25.623	122.27	0.568
											3501280182P40-078	119.776	25.6231	127.77	0.465
											3501280182P40-079	119.777	25.6231	133.23	0.342
											3501280182P40-080	119.777	25.6231	138.93	0.257
											3501280182P40-081	119.777	25.6232	144.51	0.157
											3501280182P40-082	119.777	25.6232	150.07	0.059
											3501280182P40-083	119.777	25.6232	155.75	-0.03
											3501280182P40-084	119.777	25.6232	161.07	-0.108
											3501280182P40-085	119.777	25.6233	166.57	-0.212
											3501280182P40-086	119.777	25.6233	171.78	-0.289
											3501280182P40-087	119.777	25.6233	177.27	-0.383
											3501280182P40-088	119.777	25.6233	182.73	-0.49
											3501280182P40-089	119.777	25.6234	187.7	-0.555
											3501280182P40-090	119.777	25.6234	193.24	-0.643
											3501280182P40-091	119.777	25.6234	198.36	-0.726
											3501280182P40-092	119.777	25.6234	203.89	-0.829
											3501280182P40-093	119.777	25.6235	208.98	-0.933
											3501280182P40-094	119.777	25.6235	214.48	-1.015
											3501280182P40-095	119.777	25.6235	219.89	-1.099
											3501280182P40-096	119.777	25.6235	224.99	-1.204
											3501280182P40-097	119.777	25.6236	230.16	-1.283
											3501280182P40-098	119.777	25.6236	235.32	-1.368
											3501280182P40-099	119.777	25.6236	239.03	-1.435
											3501280182P40-100	119.777	25.6236	242.03	-1.506
											3501280182P40-101	119.777	25.6236	246.42	-1.534
											3501280182P40-102	119.778	25.6237	250.8	-1.605
											3501280182P40-103	119.778	25.6237	255.62	-1.694
3	无	有	3501280482	平潭县山岐澳沙滩	福建省	福州市	平潭县	3501280482P08	211	60.46	3501280482P08-011	119.74	25.4158	0	2.931	0.106275	0.357555	1.48376	0.742303	-0.411668	1.37052	150	5.58365	4.53694	68	ENE	0.1946	0.715	3.028	9.36958	3.69176	5.15963	0.595935	0.54286	3.12858
											3501280482P08-012	119.74	25.4158	2.23	2.677
											3501280482P08-013	119.74	25.4158	4.58	2.411
											3501280482P08-014	119.74	25.4158	6.89	2.128
											3501280482P08-015	119.74	25.4158	9.33	1.852
											3501280482P08-016	119.74	25.4157	11.52	1.611
											3501280482P08-017	119.74	25.4157	13.59	1.364
											3501280482P08-018	119.74	25.4157	15.84	1.107
											3501280482P08-019	119.74	25.4157	18.25	0.855
											3501280482P08-020	119.74	25.4157	20.84	0.592
											3501280482P08-021	119.74	25.4157	23.07	0.372
											3501280482P08-022	119.739	25.4156	25.5	0.144
											3501280482P08-023	119.739	25.4156	28.04	-0.124
											3501280482P08-024	119.739	25.4156	30.37	-0.362
											3501280482P08-025	119.739	25.4156	32.46	-0.566
											3501280482P08-026	119.739	25.4156	34.14	-0.687
											3501280482P08-027	119.739	25.4156	35.35	-0.807
											3501280482P08-028	119.739	25.4156	35.38	-0.846
7	无	有	3503050582	莆田市湄洲岛九宝澜黄金沙滩	福建省	莆田市	秀屿区	3503050582P04	228	46.26	3503050582P04-015	119.108	25.045	0	2.932	0.109971	0.215536	2.214	0.534	-0.228	1.896	170	5.53841	4.50402	88	E	0.515452	0.957	4.443	5.96056	3.14859	6.85428	0.929177	0.806261	4.30546
											3503050582P04-016	119.108	25.045	1.23	2.716
											3503050582P04-017	119.108	25.045	2.4	2.575
											3503050582P04-018	119.108	25.045	3.55	2.414
											3503050582P04-019	119.108	25.045	4.78	2.229
											3503050582P04-020	119.108	25.045	6.18	2.044
											3503050582P04-021	119.108	25.045	7.71	1.845
											3503050582P04-022	119.108	25.0449	9.17	1.681
											3503050582P04-023	119.108	25.0449	10.52	1.536
											3503050582P04-024	119.108	25.0449	12.02	1.371
											3503050582P04-025	119.108	25.0449	13.64	1.157
											3503050582P04-026	119.108	25.0449	15.13	1.018
											3503050582P04-027	119.108	25.0449	17.53	0.758
											3503050582P04-028	119.108	25.0449	19.94	0.533
											3503050582P04-029	119.108	25.0449	22.62	0.255
											3503050582P04-030	119.108	25.0448	25.04	0.031
											3503050582P04-031	119.108	25.0448	28.71	-0.306
8	无	有	3505210161	惠安县崇武海滨森林公园沙滩	福建省	泉州市	惠安县	3505210161P02	83	224.6	3505210161P02-021	118.907	24.9218	0	2.875	0.021472	0.194341	2.36333	0.446554	0.00802383	1.5301	173	5.47241	4.44759	85	E	0.446366	1.25	5.023	5.12909	10.3292	2.26992	1.06694	0.93219	4.55054
											3505210161P02-022	118.907	24.9218	1.78	2.633
											3505210161P02-023	118.907	24.9218	3.66	2.356
											3505210161P02-024	118.907	24.9218	8.77	2.169
											3505210161P02-025	118.907	24.9218	15.55	2.031
											3505210161P02-026	118.908	24.9218	27.96	1.848
											3505210161P02-027	118.908	24.9218	39.23	1.612
											3505210161P02-028	118.908	24.9218	49.09	1.467
											3505210161P02-029	118.908	24.9218	59.71	1.429
											3505210161P02-030	118.908	24.9218	73.77	1.248
											3505210161P02-031	118.908	24.9218	91.59	0.955
											3505210161P02-032	118.908	24.9219	113.1	0.461
											3505210161P02-033	118.909	24.9219	132.75	-0.009
											3505210161P02-034	118.909	24.9219	153.69	-0.556
											3505210161P02-035	118.909	24.9219	169.46	-0.942
											3505210161P02-036	118.909	24.9219	189.42	-1.396
10	无	有	3505820011	晋江市深沪湾沙滩	福建省	泉州市	晋江市	3505820011P02	105	199.94	3505820011P02-017	118.645	24.6623	0	2.631	0.0166087	0.569558	0.812085	1.0908	-0.377688	1.01439	177	5.13989	4.17062	85	E	0.47611	1.307	5.508	4.6288	2.55341	8.78807	1.11041	0.939688	4.94846
											3505820011P02-018	118.645	24.6623	1.45	2.424
											3505820011P02-019	118.645	24.6623	3.64	2.123
											3505820011P02-020	118.645	24.6623	5.93	1.813
											3505820011P02-021	118.645	24.6623	8.44	1.562
											3505820011P02-022	118.645	24.6623	10.77	1.288
											3505820011P02-023	118.645	24.6623	13.26	1.05
											3505820011P02-024	118.645	24.6623	15.6	0.855
											3505820011P02-025	118.645	24.6622	23.52	0.972
											3505820011P02-026	118.645	24.6622	46	0.77
											3505820011P02-027	118.646	24.6621	76.21	0.612
											3505820011P02-028	118.646	24.6621	103.08	0.345
											3505820011P02-029	118.646	24.662	127.4	0.093
											3505820011P02-030	118.646	24.6619	150.89	-0.058
11	无	有	3505820081	晋江市金沙湾沙滩	福建省	泉州市	晋江市	3505820081P03	119	143.99	3505820081P03-018	118.574	24.5211	0	2.814	0.0386671	0.366253	1.44909	0.996446	-0.378804	0.769464	178	5.03758	4.09205	72	ENE	0.593714	1.461	5.216	3.73637	5.12275	5.31312	1.34826	1.19707	4.95359
											3505820081P03-019	118.574	24.5211	2.67	2.481
											3505820081P03-020	118.574	24.5211	5.09	2.153
											3505820081P03-021	118.574	24.5211	7.49	1.828
											3505820081P03-022	118.574	24.5211	8.35	1.78
											3505820081P03-023	118.574	24.5211	9.63	1.741
											3505820081P03-024	118.574	24.5211	19.03	1.753
											3505820081P03-025	118.575	24.521	27.13	1.58
											3505820081P03-026	118.575	24.521	29.16	1.66
											3505820081P03-027	118.575	24.521	34.14	1.687
											3505820081P03-028	118.575	24.5209	43.69	1.439
											3505820081P03-029	118.575	24.5209	52.69	1.173
											3505820081P03-030	118.575	24.5209	60.39	0.912
											3505820081P03-031	118.575	24.5208	69.18	0.558
											3505820081P03-032	118.575	24.5208	79.41	0.107
											3505820081P03-033	118.575	24.5207	91.42	-0.549
											3505820081P03-034	118.575	24.5207	98.49	-1.129
											3505820081P03-035	118.575	24.5207	100.65	-1.258
											3505820081P03-036	118.575	24.5207	106.35	-1.528
12	无	有	3506040101	漳州市隆教湾沙滩	福建省	漳州市	龙海区	3506040101P03	141	48.75	3506040101P03-018	118.068	24.251	0	2.646	0.119887	0.257952	1.95482	0.489653	-0.470968	1.10627	184	4.32319	3.55828	84	E	0.452484	1.354	5.586	3.65106	6.86821	3.38803	1.18409	1.00415	5.08855
											3506040101P03-019	118.068	24.251	3.29	2.15
											3506040101P03-020	118.068	24.251	5.7	1.803
											3506040101P03-021	118.068	24.2509	8.71	1.445
											3506040101P03-022	118.068	24.2509	10.3	1.274
											3506040101P03-023	118.068	24.2509	12.45	1.027
											3506040101P03-024	118.068	24.2509	15.66	0.667
13	无	有	3506230061	漳浦县前湖湾沙滩	福建省	漳州市	漳浦县	3506230061P02	94	138.82	3506230061P02-021	117.897	24.0849	-9.9476e-14	2.09	0.0149922	0.285071	1.81061	0.649941	-0.429938	1.26813	185	4.14878	3.4482	87	E	0.49731	1.144	5.309	3.4729	5.70661	3.87112	1.19462	0.984899	5.40771
											3506230061P02-022	117.897	24.0849	4.568	1.983
											3506230061P02-023	117.898	24.0849	15.328	1.877
											3506230061P02-024	117.898	24.0849	32.018	1.641
											3506230061P02-025	117.898	24.0849	48.429	1.419
											3506230061P02-026	117.898	24.0849	64.703	1.144
											3506230061P02-027	117.898	24.0849	72.652	1.005
											3506230061P02-028	117.898	24.0849	85.41	0.771
14	无	有	3506230151	漳浦县浮头湾沙滩	福建省	漳州市	漳浦县	3506230131P02	132	158.08	3506230131P02-031	117.653	23.9177	0	1.748	0.0199473	0.326046	1.61685	0.888261	-0.534536	1.24587	188	3.4003	2.8555	75	ENE	0.461977	1.409	5.1	2.67377	5.57429	4.60093	1.27172	1.11218	4.95858
											3506230131P02-032	117.653	23.9177	9.36	1.568
											3506230131P02-033	117.653	23.9176	18.59	1.355
											3506230131P02-034	117.653	23.9176	28.73	1.123
											3506230131P02-035	117.653	23.9175	38.25	0.905
											3506230131P02-036	117.653	23.9175	48.36	0.736
											3506230131P02-037	117.653	23.9174	51.5	0.656
											3506230131P02-038	117.653	23.9174	65	0.368
											3506230131P02-039	117.653	23.9173	73.93	0.28
2	无	有	4405150011	汕头市培隆沙滩	广东省	汕头市	澄海区	4405150011P01	108	100.55	4405150011P01-031	116.88	23.4636	0	0.89	0.0536504	0.269807	1.89	0.91	-0.28	1.06	196	1.75256	1.43532	90	E	0.259572	0.467	3.341	3.24189	3.67701	3.59911	0.540599	0.420595	4.08493
											4405150011P01-032	116.88	23.4636	3.25	0.731
											4405150011P01-033	116.88	23.4636	5.86	0.606
											4405150011P01-034	116.88	23.4636	7.45	0.527
											4405150011P01-035	116.88	23.4636	8.26	0.443
											4405150011P01-036	116.88	23.4636	9.04	0.405
3	无	有	4405140011	汕头市海门湾沙滩	广东省	汕头市	潮南区	4405140011P03	142	100.196	4405140011P03-029	116.575	23.1796	0.004	0.69	0.049122	0.314253	1.67	0.94	0.13	0.63	198	1.31846	1.07925	85	E	0.376964	1.225	4.912	1.01708	5.85854	4.39115	1.29632	1.13001	5.03901
											4405140011P03-030	116.575	23.1796	4.094	0.524
											4405140011P03-031	116.575	23.1796	8.038	0.364
											4405140011P03-032	116.575	23.1795	11.175	0.227
											4405140011P03-033	116.575	23.1795	12.778	0.17
											4405140011P03-034	116.575	23.1795	14.812	-0.032
											4405140011P03-035	116.575	23.1795	16.856	-0.138
3	无	有	4405140011	汕头市海门湾沙滩	广东省	汕头市	潮南区	4405140011P10	117	84.041	4405140011P10-030	116.543	23.1415	-0.004	0.665	0.0245633	0.34151	1.55	0.95	-0.43	0.74	198	1.31846	1.07925	85	E	0.376964	1.225	4.912	1.01708	5.27639	4.87563	1.29632	1.13001	5.03901
											4405140011P10-031	116.543	23.1415	3.206	0.57
											4405140011P10-032	116.543	23.1415	5.579	0.493
											4405140011P10-033	116.543	23.1415	7.258	0.434
											4405140011P10-034	116.543	23.1415	11.091	0.346
											4405140011P10-035	116.543	23.1414	14.014	0.283
											4405140011P10-036	116.543	23.1414	16.672	0.229
											4405140011P10-037	116.543	23.1414	20.203	0.144
											4405140011P10-038	116.543	23.1414	23.531	0.087
4	无	有	4452240161	惠来县靖海湾沙滩	广东省	揭阳市	惠来县	4452240161P01	138	84.39	4452240161P01-034	116.525	23.0005	0	0.7	0.100559	0.570382	0.81	0.59	0.13	0.98	199	1.30881	1.00435	86	E	0.271279	1.165	4.908	0.953664	3.03691	8.80164	1.3724	1.20218	5.13434
											4452240161P01-035	116.525	23.0005	1.09	0.594
											4452240161P01-036	116.525	23.0005	1.79	0.52
5	无	有	4452240391	惠来县龙江口沙滩	广东省	揭阳市	惠来县	4452240391P01	136	102.52	4452240391P01-033	116.254	22.9416	0	0.713	0.0283416	0.303549	1.72	0.71	0.09	0.94	200	1.32891	0.973449	85	E	0.439721	1.372	5.124	0.972335	6.28685	4.2005	1.36672	1.19122	5.17543
											4452240391P01-034	116.254	22.9416	1.55	0.609
											4452240391P01-035	116.254	22.9416	4.3	0.568
											4452240391P01-036	116.254	22.9415	8.08	0.484
7	无	有	4415210011	海丰县大湖沙滩	广东省	汕尾市	海丰县	4415210011P02	144	116.47	4415210011P02-026	115.591	22.8459	0	0.837	0.0178929	0.598739	0.74	1.44	-0.04	0.85	203	1.6245	1.17933	112	ESE	0.520515	0.782	4.697	1.65251	2.12587	9.26668	0.983051	0.803573	4.99017
											4415210011P02-027	115.591	22.8459	6.29	0.719
											4415210011P02-028	115.591	22.8458	12.64	0.631
											4415210011P02-029	115.591	22.8458	19.22	0.528
											4415210011P02-030	115.591	22.8457	24.97	0.418
											4415210011P02-031	115.591	22.8457	31.06	0.297
											4415210011P02-032	115.591	22.8457	34.93	0.212
7	无	有	4415210011	海丰县大湖沙滩	广东省	汕尾市	海丰县	4415210011P04	133	151.7	4415210011P04-017	115.571	22.8294	0	0.889	0.0163627	0.138696	2.85	0.39	0.08	1.2	203	1.6245	1.17933	112	ESE	0.520515	0.782	4.697	1.65251	14.6479	1.34489	0.983051	0.803573	4.99017
											4415210011P04-018	115.571	22.8294	8.3	0.753
											4415210011P04-019	115.572	22.8293	16.94	0.629
											4415210011P04-020	115.572	22.8293	24.59	0.507
											4415210011P04-021	115.572	22.8292	31.35	0.37
											4415210011P04-022	115.572	22.8292	40.03	0.234
8	无	有	4415020142	汕尾市施公寮岛新围后江沙滩	广东省	汕尾市	城区	4415020142P02	134	55.65	4415020142P02-022	115.58	22.7275	0	0.95	0.100399	0.692555	0.53	1.1	0.23	0.99	203	1.6245	1.17933	112	ESE	0.520515	0.782	4.697	1.65251	1.82935	10.7687	0.983051	0.803573	4.99017
											4415020142P02-023	115.58	22.7275	1.65	0.746
											4415020142P02-024	115.58	22.7275	3.37	0.581
											4415020142P02-025	115.58	22.7275	5.35	0.36
											4415020142P02-026	115.58	22.7275	7.23	0.172
											4415020142P02-027	115.58	22.7275	9.63	-0.024
											4415020142P02-028	115.58	22.7275	12.52	-0.307
8	无	有	4415020142	汕尾市施公寮岛新围后江沙滩	广东省	汕尾市	城区	4415020142P03	135	62.34	4415020142P03-024	115.574	22.7228	0	0.937	0.10163	0.231647	2.11	0.67	-0.27	1.27	203	1.6245	1.17933	112	ESE	0.520515	0.782	4.697	1.65251	6.74231	2.92181	0.983051	0.803573	4.99017
											4415020142P03-025	115.574	22.7228	2.38	0.635
											4415020142P03-026	115.574	22.7228	4.64	0.374
											4415020142P03-027	115.574	22.7228	7.2	0.147
											4415020142P03-028	115.575	22.7228	9.2	0.002
9	无	有	4415020391	汕尾市龙潭坑沙滩	广东省	汕尾市	城区	4415020391P03	185	44.11	4415020391P03-029	115.419	22.6896	0	0.952	0.085567	2.60268	-1.38	0.95	0.56	2.89	204	1.72105	1.26151	96	E	0.338572	1.217	4.94	1.3855	0.721395	33.4339	1.24219	1.0597	5.15023
											4415020391P03-030	115.419	22.6896	2.05	0.739
											4415020391P03-031	115.419	22.6895	4.85	0.513
											4415020391P03-032	115.419	22.6895	7.76	0.288
10	无	有	4415020501	汕尾市金町湾沙滩	广东省	汕尾市	城区	4415020501P04	180	53.87	4415020501P04-027	115.299	22.7941	0	1.087	0.0650494	0.334482	1.58	0.56	-0.02	1	205	1.80663	1.33295	131	SE	0.500686	0.576	5.049	2.15009	3.49886	4.75084	0.840261	0.656178	5.05495
											4415020501P04-028	115.299	22.7941	3.22	0.889
											4415020501P04-029	115.299	22.794	7.38	0.686
											4415020501P04-030	115.299	22.794	11.13	0.363
1	无	有	4407810251	台山市塘角湾沙滩	广东省	江门市	台山市	4407810251P04	90	32.5951	4407810251P04-027	112.646	21.8025	0	1.165	0.0957156	0.293209	1.77	1.23	1.75	2.64	228	2.33423	1.74823	108	ESE	0.541821	0.299	4.146	5.48166	2.97761	4.01621	0.425825	0.334294	3.56079
											4407810251P04-028	112.646	21.8025	1.15754	1.069
											4407810251P04-029	112.646	21.8025	2.3135	1.008
											4407810251P04-030	112.646	21.8025	3.36774	0.856
											4407810251P04-031	112.646	21.8025	3.39885	0.83
											4407810251P04-032	112.646	21.8025	4.45717	0.812
											4407810251P04-033	112.646	21.8025	5.46411	0.642
2	无	有	4417230121	阳江市三丫港沙滩	广东省	阳江市	阳东区	4417230121P06	158	65.6185	4417230121P06-048	112.094	21.7902	0	1.418	0.0311312	0.147624	2.76	0.98	0.88	1.65	231	2.80981	2.12095	135	SE	0.449952	0.517	4.634	3.95129	10.4574	1.48822	0.711113	0.560224	4.56929
											4417230121P06-049	112.094	21.7902	1.02446	1.358
											4417230121P06-050	112.094	21.7902	2.05046	1.289
											4417230121P06-051	112.094	21.7902	2.50963	1.315
											4417230121P06-052	112.094	21.7902	3.6339	1.317
											4417230121P06-053	112.094	21.7901	4.64527	1.274
											4417230121P06-054	112.094	21.7901	5.65348	1.242
3	无	有	4417210121	阳江市河北港沙滩	广东省	阳江市	阳西县	4417210121P05	151	40.8763	4417210121P05-028	111.576	21.5259	0	1.498	0.0610059	0.554785	0.85	1.01	1.46	2.33	234	3.01404	2.27791	110	ESE	0.445312	0.89	5.017	2.89028	2.53115	8.54273	1.04282	0.879987	4.82275
											4417210121P05-029	111.576	21.5259	1.1709	1.384
											4417210121P05-030	111.576	21.5259	2.21013	1.311
											4417210121P05-031	111.576	21.5259	3.23782	1.189
											4417210121P05-032	111.576	21.5258	4.32167	1.08
											4417210121P05-033	111.576	21.5258	5.56964	0.981
											4417210121P05-034	111.576	21.5258	6.79758	0.894
											4417210121P05-035	111.576	21.5258	7.8522	0.846
											4417210121P05-036	111.576	21.5258	8.87304	0.762
											4417210121P05-037	111.576	21.5258	9.89767	0.752
											4417210121P05-038	111.576	21.5258	10.9191	0.688
											4417210121P05-039	111.576	21.5258	12.0109	0.715
											4417210121P05-040	111.576	21.5258	13.4781	0.677
											4417210121P05-041	111.576	21.5258	14.6543	0.604
4	无	有	4417210061	阳江市面前海沙滩	广东省	阳江市	阳西县	4417210061P06	145	144.132	4417210061P06-096	111.697	21.5987	0	1.499	0.0189626	0.0915054	3.45	0.79	1.02	1.79	233	2.98093	2.24993	112	ESE	0.433815	0.849	4.91	2.9661	31.8344	0.660944	1.005	0.844342	4.77646
											4417210061P06-097	111.697	21.5987	1.21195	1.455
											4417210061P06-098	111.697	21.5987	2.23039	1.461
											4417210061P06-099	111.697	21.5987	3.44681	1.446
											4417210061P06-100	111.697	21.5987	4.48102	1.398
											4417210061P06-101	111.697	21.5987	5.50057	1.404
											4417210061P06-102	111.697	21.5987	6.74813	1.402
											4417210061P06-103	111.697	21.5987	7.75782	1.308
											4417210061P06-104	111.697	21.5987	8.79237	1.329
											4417210061P06-105	111.697	21.5987	9.8141	1.297
											4417210061P06-106	111.697	21.5986	10.9039	1.271
											4417210061P06-107	111.697	21.5986	12.1566	1.242
											4417210061P06-108	111.697	21.5986	13.179	1.228
											4417210061P06-109	111.697	21.5986	14.2206	1.208
											4417210061P06-110	111.697	21.5986	15.4147	1.205
											4417210061P06-111	111.697	21.5986	16.4146	1.196
											4417210061P06-112	111.697	21.5986	17.437	1.167
											4417210061P06-113	111.697	21.5986	18.4678	1.145
											4417210061P06-114	111.697	21.5986	19.5452	1.086
											4417210061P06-115	111.697	21.5986	20.624	1.16
											4417210061P06-116	111.697	21.5986	21.674	1.101
											4417210061P06-117	111.697	21.5986	22.7045	1.071
											4417210061P06-118	111.697	21.5986	23.7405	1.074
											4417210061P06-119	111.697	21.5985	24.7414	1.023
											4417210061P06-120	111.697	21.5985	25.7823	1.061
											4417210061P06-121	111.697	21.5985	26.8801	1.05
											4417210061P06-122	111.697	21.5985	27.8944	1.036
											4417210061P06-123	111.697	21.5985	28.9318	0.994
											4417210061P06-124	111.697	21.5985	29.9399	0.951
											4417210061P06-125	111.697	21.5985	31.1541	0.926
											4417210061P06-126	111.697	21.5985	32.5853	0.912
											4417210061P06-127	111.697	21.5985	33.3772	0.885
											4417210061P06-128	111.697	21.5985	34.532	0.877
											4417210061P06-129	111.697	21.5985	35.5389	0.863
											4417210061P06-130	111.697	21.5985	36.5817	0.85
											4417210061P06-131	111.697	21.5984	37.6155	0.798
											4417210061P06-132	111.697	21.5984	38.4772	0.777
											4417210061P06-133	111.697	21.5984	39.4461	0.751
4	无	有	4417210061	阳江市面前海沙滩	广东省	阳江市	阳西县	4417210061P09	118	89.2643	4417210061P09-049	111.671	21.5721	0	1.498	0.0230803	0.366021	1.45	0.91	1.03	1.7	233	2.98093	2.24993	112	ESE	0.433815	0.849	4.91	2.9661	3.9632	5.30903	1.005	0.844342	4.77646
											4417210061P09-050	111.671	21.572	1.07667	1.482
											4417210061P09-051	111.671	21.572	2.3323	1.421
											4417210061P09-052	111.671	21.572	3.40418	1.407
											4417210061P09-053	111.671	21.572	4.43993	1.393
											4417210061P09-054	111.671	21.572	5.44355	1.337
											4417210061P09-055	111.671	21.572	6.51942	1.363
											4417210061P09-056	111.671	21.572	7.55528	1.305
											4417210061P09-057	111.671	21.572	8.80234	1.258
											4417210061P09-058	111.671	21.572	9.83047	1.271
											4417210061P09-059	111.671	21.572	10.8544	1.212
											4417210061P09-060	111.671	21.572	11.9261	1.215
											4417210061P09-061	111.671	21.572	12.9448	1.186
											4417210061P09-062	111.671	21.572	13.9745	1.141
											4417210061P09-063	111.671	21.572	14.8215	1.116
											4417210061P09-064	111.671	21.572	15.7175	1.092
											4417210061P09-065	111.671	21.572	16.7486	1.108
											4417210061P09-066	111.671	21.572	17.7847	1.049
											4417210061P09-067	111.671	21.572	18.9436	0.989
											4417210061P09-068	111.671	21.572	20.1082	0.947
											4417210061P09-069	111.671	21.572	21.3194	0.942
											4417210061P09-070	111.672	21.572	22.5712	0.943
											4417210061P09-071	111.672	21.5719	23.6873	0.963
											4417210061P09-072	111.672	21.5719	24.8894	0.867
											4417210061P09-073	111.672	21.5719	26.0612	0.862
											4417210061P09-074	111.672	21.5719	27.1569	0.798
											4417210061P09-075	111.672	21.5719	28.2602	0.807
											4417210061P09-076	111.672	21.5719	29.3892	0.794
											4417210061P09-077	111.672	21.5719	30.5583	0.774
											4417210061P09-078	111.672	21.5719	31.5665	0.765
											4417210061P09-079	111.672	21.5719	32.6884	0.724
											4417210061P09-080	111.672	21.5719	33.7176	0.72
											4417210061P09-081	111.672	21.5719	35.5419	0.643
											4417210061P09-082	111.672	21.5719	36.6112	0.653
5	无	有	4409230011	茂名市山后沙滩	广东省	茂名市	电白区	4409230011P04	144	100.739	4409230011P04-078	111.427	21.5229	0	1.543	0.00687146	0.275476	1.86	0.84	1.2	1.84	235	3.07584	2.32696	111	ESE	0.502268	0.836	5.004	3.12566	5.47877	3.70011	0.984059	0.815788	4.85427
											4409230011P04-079	111.427	21.5229	1.11331	1.541
											4409230011P04-080	111.427	21.5229	2.1014	1.521
											4409230011P04-081	111.427	21.5229	3.21301	1.496
											4409230011P04-082	111.427	21.5229	4.33811	1.546
											4409230011P04-083	111.427	21.5229	5.44184	1.511
											4409230011P04-084	111.427	21.5229	6.61411	1.493
											4409230011P04-085	111.427	21.5229	7.69221	1.497
											4409230011P04-086	111.427	21.5228	8.80754	1.474
											4409230011P04-087	111.427	21.5228	9.9042	1.477
											4409230011P04-088	111.427	21.5228	11.0719	1.492
											4409230011P04-089	111.427	21.5228	12.2082	1.475
											4409230011P04-090	111.427	21.5228	13.2432	1.452
6	无	有	4409230021	茂名市沙尾沙滩	广东省	茂名市	电白区	4409230021P02	152	25.6124	4409230021P02-015	111.4	21.5156	0	1.582	0.0733178	0.248273	2.01	1.03	1.22	1.92	235	3.07584	2.32696	111	ESE	0.502268	0.836	5.004	3.12566	6.30324	3.21613	0.984059	0.815788	4.85427
											4409230021P02-016	111.4	21.5156	1.05632	1.475
											4409230021P02-017	111.4	21.5156	1.97124	1.422
											4409230021P02-018	111.4	21.5156	2.75162	1.35
											4409230021P02-019	111.4	21.5156	3.8124	1.211
											4409230021P02-020	111.4	21.5156	4.81674	1.14
											4409230021P02-021	111.4	21.5156	5.78048	1.057
											4409230021P02-022	111.4	21.5156	6.2699	1
											4409230021P02-023	111.4	21.5155	7.27212	0.897
											4409230021P02-024	111.4	21.5155	7.66881	0.965
											4409230021P02-025	111.4	21.5155	8.66058	0.886
											4409230021P02-026	111.4	21.5155	9.72201	0.829
											4409230021P02-027	111.4	21.5155	10.641	0.791
											4409230021P02-028	111.4	21.5155	11.6343	0.729
8	无	有	4409230101	茂名市博贺湾沙滩	广东省	茂名市	电白区	4409230101P03	168	40.9733	4409230101P03-031	111.196	21.4798	0	1.603	0.0680545	0.283221	1.82	0.9	1.37	2.07	236	3.0997	2.34687	114	ESE	0.521464	0.763	4.799	3.45691	5.01294	3.83813	0.896668	0.741212	4.66036
											4409230101P03-032	111.196	21.4798	1.13789	1.506
											4409230101P03-033	111.196	21.4797	2.23203	1.394
											4409230101P03-034	111.196	21.4797	3.07658	1.365
											4409230101P03-035	111.196	21.4797	3.65652	1.325
											4409230101P03-036	111.196	21.4797	4.73374	1.312
											4409230101P03-037	111.196	21.4797	5.7325	1.243
											4409230101P03-038	111.196	21.4797	6.72921	1.146
											4409230101P03-039	111.196	21.4797	7.48653	1.066
											4409230101P03-040	111.196	21.4797	8.50789	1.024
8	无	有	4409230101	茂名市博贺湾沙滩	广东省	茂名市	电白区	4409230101P06	168	46.0887	4409230101P06-036	111.151	21.4667	0	1.557	0.0649144	0.25	2	0.97	1.53	2.23	236	3.0997	2.34687	114	ESE	0.521464	0.763	4.799	3.45691	5.92593	3.2468	0.896668	0.741212	4.66036
											4409230101P06-037	111.151	21.4667	1.03888	1.469
											4409230101P06-038	111.151	21.4667	2.31261	1.39
											4409230101P06-039	111.151	21.4667	3.56582	1.327
											4409230101P06-040	111.151	21.4667	4.79092	1.246
9	无	有	4409230111	茂名市月牙湾沙滩	广东省	茂名市	电白区	4409230111P02	174	99.3615	4409230111P02-082	111.126	21.4675	0	1.585	0.0352847	0.171943	2.54	1.07	1.13	1.84	236	3.0997	2.34687	114	ESE	0.521464	0.763	4.799	3.45691	10.1878	1.88856	0.896668	0.741212	4.66036
											4409230111P02-083	111.126	21.4675	1.12782	1.601
											4409230111P02-084	111.126	21.4675	2.16308	1.484
											4409230111P02-085	111.126	21.4675	3.3047	1.495
											4409230111P02-086	111.126	21.4675	4.40125	1.466
											4409230111P02-087	111.127	21.4675	5.52822	1.421
											4409230111P02-088	111.127	21.4675	6.70109	1.381
											4409230111P02-089	111.127	21.4675	7.80051	1.313
											4409230111P02-090	111.127	21.4675	8.89904	1.271
12	无	有	4408830041	湛江市沙田港沙滩	广东省	湛江市	吴川市	4408830041P02	183	79.7992	4408830041P02-051	110.852	21.3919	0	1.432	0.0267779	0.176777	2.5	1.12	1.06	1.88	237	2.86295	2.1679	111	ESE	0.536547	0.818	4.709	3.12528	10.4788	1.96958	0.916061	0.780096	4.43853
											4408830041P02-052	110.852	21.3919	1.22355	1.415
											4408830041P02-053	110.852	21.3918	2.32735	1.38
											4408830041P02-054	110.852	21.3918	3.36037	1.345
											4408830041P02-055	110.852	21.3918	4.45651	1.307
											4408830041P02-056	110.852	21.3918	5.48686	1.329
											4408830041P02-057	110.852	21.3918	6.5896	1.282
											4408830041P02-058	110.852	21.3918	7.73458	1.202
											4408830041P02-059	110.852	21.3918	8.89441	1.181
											4408830041P02-060	110.852	21.3918	9.89679	1.161
											4408830041P02-061	110.852	21.3918	10.9833	1.154
											4408830041P02-062	110.852	21.3918	12.1625	1.1
											4408830041P02-063	110.852	21.3917	13.2623	1.049
											4408830041P02-064	110.852	21.3917	14.2836	1.062
											4408830041P02-065	110.852	21.3917	15.4833	0.997
											4408830041P02-066	110.852	21.3917	16.5175	0.988
											4408830041P02-067	110.852	21.3917	17.5316	0.953
											4408830041P02-068	110.852	21.3917	18.7007	0.92
											4408830041P02-069	110.852	21.3917	19.7004	0.876
											4408830041P02-070	110.852	21.3917	20.7484	0.828
											4408830041P02-071	110.852	21.3917	21.7901	0.854
											4408830041P02-072	110.852	21.3917	22.9137	0.788
											4408830041P02-073	110.852	21.3916	24.0459	0.754
											4408830041P02-074	110.852	21.3916	25.1031	0.713
											4408830041P02-075	110.852	21.3916	24.0497	0.788
1	无	有	4408250561	徐闻县东场湾沙滩	广东省	湛江市	徐闻县	4408250561P01	260	39.45	4408250561P01-027	109.935	20.2945	0	1.57	0.123752	0.219151	2.19	0.35	-0.12	1.11	247	3.02847	2.05531	251	WSW	0.218542	0.349741	3.722	8.75054	4.47789	2.70148	0.34609	0.287801	2.86097
											4408250561P01-028	109.935	20.2945	0.766988	1.453
											4408250561P01-029	109.935	20.2945	1.88033	1.304
											4408250561P01-030	109.935	20.2945	2.72518	1.191
											4408250561P01-031	109.935	20.2945	4.0349	1.03
											4408250561P01-032	109.935	20.2945	5.3833	0.838
											4408250561P01-033	109.935	20.2945	6.25992	0.777
											4408250561P01-034	109.935	20.2945	7.46654	0.646
6	无	有	4408230071	遂溪县北拉村沙滩	广东省	湛江市	遂溪县	4408230071P01	268	17.68	4408230071P01-010	109.775	21.2383	0	2.583	0.145414	0.707107	0.5	0.71	0.08	1.08	252	4.45182	3.13883	227	SW	0.278874	0.468737	3.72344	11.3794	1.33636	10.9972	0.391219	0.34776	2.66204
											4408230071P01-011	109.775	21.2383	2.2219	2.142
											4408230071P01-012	109.775	21.2383	3.39626	2.108
											4408230071P01-013	109.775	21.2383	4.27152	1.979
											4408230071P01-014	109.775	21.2383	5.42354	1.739
											4408230071P01-015	109.775	21.2383	6.24422	1.675
7	无	有	4408230151	遂溪县下山井村沙滩	广东省	湛江市	遂溪县	4408230151P02	349	42.07	4408230151P02-014	109.858	21.3557	0	1.916	0.0518226	1.34723	-0.43	1.13	-0.12	1.02	253	3.76361	2.62954	244	WSW	0.357135	0.0890113	2.62583	24.031	0.349103	19.9531	0.156615	0.120495	2.24837
											4408230151P02-015	109.858	21.3557	2.12072	1.682
											4408230151P02-016	109.858	21.3557	3.73894	1.489
											4408230151P02-017	109.858	21.3557	5.89965	1.334
											4408230151P02-018	109.858	21.3557	7.92379	1.22
											4408230151P02-019	109.858	21.3557	10.2725	1.113
											4408230151P02-020	109.858	21.3558	12.4236	1.016
											4408230151P02-021	109.858	21.3558	15.0743	0.943
											4408230151P02-022	109.858	21.3558	17.4397	0.888
											4408230151P02-023	109.858	21.3558	19.6074	0.876
											4408230151P02-024	109.858	21.3558	20.9754	0.829
8	无	有	4505210061	合浦县耙硼村沙滩	广西壮族自治区	北海市	合浦县	4505210061P02	221	547.52	4505210061P02-015	109.688	21.4952	0	2.1306	0.0030357	0.913831	0.13	0.32	-0.1	0.7	267	4.2766	3.01916	219	SW	0.223078	0.240062	3.06121	14.894	0.837751	14.1096	0.287136	0.247311	2.42918
											4505210061P02-016	109.688	21.4952	2.08329	1.8266
											4505210061P02-017	109.688	21.4952	3.60084	1.6696
											4505210061P02-018	109.688	21.4952	6.14271	1.6126
											4505210061P02-019	109.688	21.4952	9.77758	1.6076
											4505210061P02-020	109.688	21.4951	14.7697	1.5846
											4505210061P02-021	109.688	21.4951	19.416	1.5286
											4505210061P02-022	109.688	21.495	27.8031	1.4166
											4505210061P02-023	109.688	21.495	36.1737	1.4496
											4505210061P02-024	109.688	21.4949	50.1918	1.3856
											4505210061P02-025	109.688	21.4948	61.9054	1.4046
											4505210061P02-026	109.688	21.4947	69.7707	1.3496
											4505210061P02-027	109.688	21.4947	78.7359	1.3806
											4505210061P02-028	109.688	21.4946	86.4321	1.3806
											4505210061P02-029	109.687	21.4946	92.5423	1.3506
											4505210061P02-030	109.687	21.4945	99.512	1.2896
											4505210061P02-031	109.687	21.4945	109.288	1.3216
											4505210061P02-032	109.687	21.4944	117.528	1.2346
											4505210061P02-033	109.687	21.4944	124.058	1.2356
											4505210061P02-034	109.687	21.4943	130.986	1.2736
											4505210061P02-035	109.687	21.4943	138.949	1.2686
											4505210061P02-036	109.687	21.4942	147.242	1.2186
											4505210061P02-037	109.687	21.4941	158.171	1.2226
											4505210061P02-038	109.687	21.4941	169.641	1.1586
											4505210061P02-039	109.687	21.494	180.039	1.1846
											4505210061P02-040	109.687	21.4939	191.396	1.1516
											4505210061P02-041	109.687	21.4939	198.342	1.1436
											4505210061P02-042	109.687	21.4938	207.697	1.1386
											4505210061P02-043	109.687	21.4937	215.195	1.1396
											4505210061P02-044	109.687	21.4937	221.844	1.1116
											4505210061P02-045	109.687	21.4936	230.413	1.0796
											4505210061P02-046	109.687	21.4936	237.506	1.0586
											4505210061P02-047	109.687	21.4935	245.392	1.0416
											4505210061P02-048	109.686	21.4935	252.794	1.0356
											4505210061P02-049	109.686	21.4934	259.984	1.0116
											4505210061P02-050	109.686	21.4934	268.784	0.9856
											4505210061P02-051	109.686	21.4933	277.273	0.9846
											4505210061P02-052	109.686	21.4933	284.053	0.9746
											4505210061P02-053	109.686	21.4932	291.904	0.9676
											4505210061P02-054	109.686	21.4932	299.189	0.9716
											4505210061P02-055	109.686	21.4931	308.749	0.9046
											4505210061P02-056	109.686	21.493	318.271	0.8926
											4505210061P02-057	109.686	21.493	327.367	0.8866
											4505210061P02-058	109.686	21.4929	335.604	0.8686
											4505210061P02-059	109.686	21.4929	343.372	0.9036
											4505210061P02-060	109.686	21.4928	352.66	0.8546
											4505210061P02-061	109.686	21.4927	362.897	0.8396
											4505210061P02-062	109.686	21.4927	370.386	0.8186
											4505210061P02-063	109.686	21.4926	378.512	0.8156
											4505210061P02-064	109.686	21.4926	386.774	0.8026
											4505210061P02-065	109.686	21.4925	395.266	0.7886
											4505210061P02-066	109.686	21.4925	402.759	0.7636
											4505210061P02-067	109.685	21.4924	410.343	0.7526
											4505210061P02-068	109.685	21.4924	416.615	0.7426
											4505210061P02-069	109.685	21.4923	423.358	0.7886
											4505210061P02-070	109.685	21.4923	431.446	0.6856
											4505210061P02-071	109.685	21.4922	437.926	0.7136
											4505210061P02-072	109.685	21.4922	444.345	0.7156
											4505210061P02-073	109.685	21.4921	450.996	0.6676
											4505210061P02-074	109.685	21.4921	458.938	0.6686
											4505210061P02-075	109.685	21.492	465.863	0.6776
											4505210061P02-076	109.685	21.492	472.321	0.6436
											4505210061P02-077	109.685	21.4919	478.584	0.6236
											4505210061P02-078	109.685	21.4919	485.932	0.6276
											4505210061P02-079	109.685	21.4918	496.158	0.5926
											4505210061P02-080	109.685	21.4918	503.196	0.5956
											4505210061P02-081	109.685	21.4917	508.781	0.5406
											4505210061P02-082	109.685	21.4917	514.644	0.5666
											4505210061P02-083	109.685	21.4916	521.426	0.5996
											4505210061P02-084	109.685	21.4916	528.379	0.5266
9	无	无	4505120031	北海市青山头沙滩	广西壮族自治区	北海市	铁山港区	4505120031P01	172	82.65	4505120031P01-009	109.487	21.474	0	2.2974	0.0149358	2.94854	-1.56	1.12	0.29	1.1	264	4.66912	3.30108	206	SSW	0.208944	0.485439	3.45004	12.1586	0.408307	36.5512	0.384019	0.345598	2.57315
											4505120031P01-010	109.487	21.474	2.00933	2.0624
											4505120031P01-011	109.487	21.4739	4.43321	1.8174
											4505120031P01-012	109.487	21.4739	6.68402	1.6284
											4505120031P01-013	109.487	21.4739	9.40139	1.5854
											4505120031P01-014	109.487	21.4739	12.2553	1.5284
											4505120031P01-015	109.487	21.4739	14.6305	1.5304
											4505120031P01-016	109.487	21.4738	17.1307	1.4744
											4505120031P01-017	109.487	21.4738	19.8653	1.4454
											4505120031P01-018	109.487	21.4738	23.6746	1.4304
											4505120031P01-019	109.487	21.4737	27.3092	1.4024
											4505120031P01-020	109.487	21.4737	30.8259	1.4304
											4505120031P01-021	109.487	21.4737	33.1063	1.2644
											4505120031P01-022	109.487	21.4737	37.3246	1.3724
											4505120031P01-023	109.487	21.4736	39.3771	1.3944
											4505120031P01-024	109.487	21.4736	42.2848	1.3024
											4505120031P01-025	109.487	21.4736	45.7695	1.3604
											4505120031P01-026	109.487	21.4736	48.5636	1.3224
											4505120031P01-027	109.487	21.4735	51.5107	1.3484
											4505120031P01-028	109.487	21.4735	57.6762	1.3244
											4505120031P01-029	109.487	21.4734	64.2283	1.3114
											4505120031P01-030	109.487	21.4734	69.4975	1.2594
12	无	有	4505020132	北海市涠洲岛石螺口沙滩	广西壮族自治区	北海市	海城区	4505020132P01	209	109.88	4505020132P01-008	109.089	21.014	0	2.257	0.0240144	1.04247	-0.06	0.94	0	1.1	268	4.49114	3.14706	207	SSW	0.155363	0.686371	3.82774	6.52996	1.36856	15.933	0.687774	0.646737	3.15416
											4505020132P01-009	109.089	21.0139	2.13042	2.089
											4505020132P01-010	109.089	21.0139	5.04875	1.929
											4505020132P01-011	109.089	21.0139	12.1214	1.782
											4505020132P01-012	109.089	21.0138	20.6755	1.622
											4505020132P01-013	109.089	21.0137	29.9232	1.428
											4505020132P01-014	109.089	21.0136	40.5909	1.131
											4505020132P01-015	109.089	21.0136	49.4773	0.912
											4505020132P01-016	109.089	21.0135	58.7163	0.676
											4505020132P01-017	109.089	21.0134	68.4984	0.427
											4505020132P01-018	109.089	21.0134	76.2527	0.207
											4505020132P01-019	109.089	21.0133	81.5197	0.055
											4505020132P01-020	109.089	21.0132	96.9001	-0.07
1	无	有	4601050011	海口市金沙湾沙滩	海南省	海口市	秀英区	4601050011P01	104	48.53	4601050011P01-010	110.093	19.9868	0	1.262	0.0970846	0.9644	0.0522964	0.95	0.06	0.95	337	2.33327	1.61098	51	NE	0.337517	0.255282	3.0855	7.65655	0.648318	14.8365	0.304742	0.233277	3.16821
											4601050011P01-011	110.093	19.9868	2.90685	0.802
											4601050011P01-012	110.093	19.9868	6.3054	0.329
											4601050011P01-013	110.093	19.9868	9.59052	-0.105
											4601050011P01-014	110.093	19.9869	12.1457	-0.433
											4601050011P01-015	110.093	19.9869	14.6353	-0.702
											4601050011P01-016	110.093	19.9869	17.2947	-0.861
											4601050011P01-017	110.093	19.9869	20.151	-1.071
											4601050011P01-018	110.093	19.987	22.586	-1.282
											4601050011P01-019	110.093	19.987	24.6819	-1.435
											4601050011P01-020	110.093	19.987	25.8223	-1.534
											4601050011P01-021	110.093	19.987	27.8664	-1.651
											4601050011P01-022	110.093	19.987	29.667	-1.704
											4601050011P01-023	110.093	19.987	31.5086	-1.797
1	无	有	4601050011	海口市金沙湾沙滩	海南省	海口市	秀英区	4601050011P02	124	103.48	4601050011P02-011	110.119	19.9956	0	1.314	0.0390186	0.6851	0.545614	1.22	-0.22	0.98	337	2.33327	1.61098	51	NE	0.337517	0.255282	3.0855	7.65655	0.903057	10.6513	0.304742	0.233277	3.16821
											4601050011P02-012	110.118	19.9956	5.82694	0.808
											4601050011P02-013	110.118	19.9956	8.56925	0.642
											4601050011P02-014	110.118	19.9957	11.3116	0.392
											4601050011P02-015	110.118	19.9957	14.0496	0.124
											4601050011P02-016	110.118	19.9957	17.2233	-0.035
											4601050011P02-017	110.118	19.9957	19.3434	-0.144
											4601050011P02-018	110.118	19.9957	21.6151	-0.249
											4601050011P02-019	110.118	19.9957	23.5891	-0.329
											4601050011P02-020	110.118	19.9958	25.6363	-0.427
											4601050011P02-021	110.118	19.9958	27.9376	-0.538
											4601050011P02-022	110.118	19.9958	30.2819	-0.617
											4601050011P02-023	110.118	19.9958	32.8505	-0.705
											4601050011P02-024	110.118	19.9958	35.0168	-0.764
											4601050011P02-025	110.118	19.9958	37.3971	-0.841
											4601050011P02-026	110.118	19.9959	40.1297	-0.9
											4601050011P02-027	110.118	19.9959	42.8507	-0.951
											4601050011P02-028	110.118	19.9959	45.6274	-1.025
											4601050011P02-029	110.118	19.9959	48.196	-1.061
											4601050011P02-030	110.118	19.9959	50.8345	-1.104
											4601050011P02-031	110.118	19.996	53.6665	-1.151
											4601050011P02-032	110.118	19.996	56.7187	-1.171
											4601050011P02-033	110.118	19.996	59.7234	-1.202
											4601050011P02-034	110.118	19.996	62.2338	-1.249
											4601050011P02-035	110.118	19.9961	64.7029	-1.267
											4601050011P02-036	110.118	19.9961	67.4294	-1.317
2	无	有	4601080041	海口市铺前湾沙滩	海南省	海口市	美兰区	4601080041P01	60	74.82	4601080041P01-025	110.391	20.0755	0	0.968605	0.117497	0.4245	1.23616	0.49	0.04	1	282	1.84507	1.3473	47	NE	0.630735	0.502281	3.95125	3.55709	2.18662	6.33256	0.518704	0.417089	3.74598
											4601080041P01-026	110.391	20.0756	2.8614	0.583605
											4601080041P01-027	110.391	20.0756	5.54735	0.278605
											4601080041P01-028	110.391	20.0756	7.48185	0.107605
											4601080041P01-029	110.391	20.0756	9.35017	-0.083395
											4601080041P01-030	110.391	20.0756	11.6088	-0.395395
2	无	有	4601080041	海口市铺前湾沙滩	海南省	海口市	美兰区	4601080041P02	62	81.97	4601080041P02-021	110.402	20.0696	0	1.31261	0.0556286	0.4145	1.27056	0.41	-0.09	1.06	282	1.84507	1.3473	47	NE	0.630735	0.502281	3.95125	3.55709	2.24834	6.15874	0.518704	0.417089	3.74598
											4601080041P02-022	110.402	20.0697	3.25201	0.882605
											4601080041P02-023	110.402	20.0697	6.50637	0.571605
											4601080041P02-024	110.402	20.0697	8.64952	0.360605
											4601080041P02-025	110.402	20.0697	9.97811	0.186605
											4601080041P02-026	110.402	20.0697	11.9249	0.075605
											4601080041P02-027	110.402	20.0697	14.1176	0.064605
											4601080041P02-028	110.402	20.0698	17.9047	0.027605
											4601080041P02-029	110.402	20.0698	20.9298	-0.020395
											4601080041P02-030	110.402	20.0698	25.4186	-0.101395
2	无	有	4601080041	海口市铺前湾沙滩	海南省	海口市	美兰区	4601080041P03	60	64.66	4601080041P03-014	110.416	20.0615	0	1.0736	0.0244807	0.358	1.48197	0.41	0	1.06	282	1.84507	1.3473	47	NE	0.630735	0.502281	3.95125	3.55709	2.67962	5.1675	0.518704	0.417089	3.74598
											4601080041P03-015	110.416	20.0615	2.00946	0.842605
											4601080041P03-016	110.416	20.0615	3.69915	0.695605
											4601080041P03-017	110.416	20.0615	5.72819	0.610605
											4601080041P03-018	110.416	20.0615	7.95057	0.570605
											4601080041P03-019	110.416	20.0616	10.2114	0.525605
											4601080041P03-020	110.416	20.0616	11.4075	0.353605
											4601080041P03-021	110.416	20.0616	12.3093	0.577605
											4601080041P03-022	110.416	20.0616	15.1398	0.486605
											4601080041P03-023	110.416	20.0616	17.6682	0.350605
											4601080041P03-024	110.416	20.0616	18.401	0.422605
											4601080041P03-025	110.416	20.0616	20.1466	0.576605
											4601080041P03-026	110.416	20.0617	22.1578	0.516605
											4601080041P03-027	110.416	20.0617	24.2825	0.476605
											4601080041P03-028	110.416	20.0617	26.6126	0.426605
											4601080041P03-029	110.416	20.0617	27.7896	0.416605
											4601080041P03-030	110.416	20.0617	30.2687	0.332605
2	无	有	4601080041	海口市铺前湾沙滩	海南省	海口市	美兰区	4601080041P04	59	72.47	4601080041P04-026	110.452	20.0413	0	1.0126	0.0543159	0.2984	1.74468	0.45	0	1.06	282	1.84507	1.3473	47	NE	0.630735	0.502281	3.95125	3.55709	3.37009	4.10877	0.518704	0.417089	3.74598
											4601080041P04-027	110.452	20.0413	1.64052	0.893605
											4601080041P04-028	110.452	20.0413	3.24326	0.808605
											4601080041P04-029	110.452	20.0413	4.95387	0.726605
											4601080041P04-030	110.452	20.0413	6.64299	0.642605
											4601080041P04-031	110.452	20.0413	8.0727	0.567605
											4601080041P04-032	110.452	20.0413	9.00331	0.539605
											4601080041P04-033	110.452	20.0414	9.99006	0.500605
											4601080041P04-034	110.452	20.0414	10.9338	0.432605
											4601080041P04-035	110.452	20.0414	11.2636	0.406605
											4601080041P04-036	110.452	20.0414	11.9037	0.373605
											4601080041P04-037	110.452	20.0414	12.3352	0.342605
2	无	有	4601080041	海口市铺前湾沙滩	海南省	海口市	美兰区	4601080041P05	66	84.96	4601080041P05-029	110.487	20.0254	0	0.935605	0.0222948	0.3292	1.60296	0.5	0.2	1.19	282	1.84507	1.3473	47	NE	0.630735	0.502281	3.95125	3.55709	2.97337	4.65698	0.518704	0.417089	3.74598
											4601080041P05-030	110.487	20.0254	2.77241	0.838605
											4601080041P05-031	110.487	20.0254	5.79768	0.738605
											4601080041P05-032	110.487	20.0255	8.42007	0.686605
											4601080041P05-033	110.487	20.0255	11.1055	0.650605
											4601080041P05-034	110.487	20.0255	14.3261	0.608605
											4601080041P05-035	110.487	20.0255	15.923	0.580605
2	无	有	4601080041	海口市铺前湾沙滩	海南省	海口市	美兰区	4601080041P06	69	78.78	4601080041P06-027	110.488	20.0247	0	0.999605	0.0313722	0.2118	2.23923	0.48	0.07	1.11	282	1.84507	1.3473	47	NE	0.630735	0.502281	3.95125	3.55709	5.38136	2.57313	0.518704	0.417089	3.74598
											4601080041P06-028	110.488	20.0248	2.74158	0.891605
											4601080041P06-029	110.488	20.0248	5.92031	0.790605
											4601080041P06-030	110.488	20.0248	9.56261	0.699605
3	无	有	4690050061	文昌市两洋村沙滩	海南省	文昌市	铺前镇	4690050061P01	129	59.06	4690050061P01-014	110.661	20.1222	0	1.13301	0.0769462	0.3215	1.63711	0.42	-0.01	1.05	283	1.85985	1.37649	42	NE	0.489294	0.440718	3.59176	3.59858	3.19137	4.52015	0.516828	0.424559	3.58274
											4690050061P01-015	110.661	20.1222	2.21506	0.885005
											4690050061P01-016	110.661	20.1222	4.38079	0.645005
											4690050061P01-017	110.66	20.1222	6.61982	0.459005
											4690050061P01-018	110.66	20.1222	8.38502	0.366005
											4690050061P01-019	110.66	20.1223	10.8851	0.177005
											4690050061P01-020	110.66	20.1223	13.4231	-0.006995
											4690050061P01-021	110.66	20.1223	15.9674	-0.194995
											4690050061P01-022	110.66	20.1223	18.2056	-0.335995
											4690050061P01-023	110.66	20.1223	20.1711	-0.458995
											4690050061P01-024	110.66	20.1223	21.9705	-0.591995
											4690050061P01-025	110.66	20.1224	23.1314	-0.725995
											4690050061P01-026	110.66	20.1224	23.6424	-0.751995
											4690050061P01-027	110.66	20.1224	24.8355	-0.777995
3	无	有	4690050061	文昌市两洋村沙滩	海南省	文昌市	铺前镇	4690050061P02	174	32.31	4690050061P02-011	110.676	20.1407	0	1.073	0.0986677	0.229	2.12658	0.41	-0.07	1.04	283	1.85985	1.37649	42	NE	0.489294	0.440718	3.59176	3.59858	5.01738	2.87511	0.516828	0.424559	3.58274
											4690050061P02-012	110.676	20.1407	2.49876	0.815005
											4690050061P02-013	110.676	20.1407	5.19055	0.519005
											4690050061P02-014	110.676	20.1407	7.60836	0.296005
											4690050061P02-015	110.676	20.1407	10.2917	0.075005
											4690050061P02-016	110.676	20.1407	12.814	-0.166995
											4690050061P02-017	110.676	20.1407	14.7465	-0.381995
4	无	有	4690050201	文昌市加丁港沙滩	海南省	文昌市	翁田镇	4690050201P02	94	97.33	4690050201P02-039	110.798	20.0081	0	1.072	0.0331144	0.2362	2.08192	0.45	-0.02	1.01	284	2.08432	1.57635	90	E	0.525472	1.13802	5.33902	1.86622	7.78651	3.00215	1.11687	0.963278	4.77778
											4690050201P02-040	110.798	20.0081	1.48387	1.032
											4690050201P02-041	110.798	20.0081	2.98452	0.992
											4690050201P02-042	110.798	20.0082	4.13717	0.935
5	无	有	4690050291	文昌市七洲洋南沙滩	海南省	文昌市	翁田镇、昌洒镇、龙楼镇	4690050291P01	8	107.47	4690050291P01-033	110.972	19.901	0	1.156	0.041155	0.2698	1.89004	0.47	-0.14	0.98	286	1.89252	1.40766	87	E	0.303976	1.35181	5.64847	1.22727	8.20378	3.59899	1.54206	1.37891	5.22283
											4690050291P01-034	110.972	19.901	1.89669	0.848005
											4690050291P01-035	110.972	19.901	5.01003	0.954005
											4690050291P01-036	110.972	19.901	7.86588	0.813005
											4690050291P01-037	110.972	19.901	8.53007	0.768005
											4690050291P01-038	110.972	19.901	10.8127	0.702005
											4690050291P01-039	110.972	19.901	10.6982	0.692005
											4690050291P01-040	110.972	19.901	12.4487	0.632005
											4690050291P01-041	110.972	19.901	15.3585	0.496005
											4690050291P01-042	110.973	19.901	18.3453	0.401005
5	无	有	4690050291	文昌市七洲洋南沙滩	海南省	文昌市	翁田镇、昌洒镇、龙楼镇	4690050291P02	185	96.23	4690050291P02-027	110.997	19.8151	0	0.991005	0.0400192	0.2732	1.87197	0.48	-0.14	0.95	286	1.89252	1.40766	87	E	0.303976	1.35181	5.64847	1.22727	8.068	3.65956	1.54206	1.37891	5.22283
											4690050291P02-028	110.997	19.8151	2.76776	0.754005
											4690050291P02-029	110.997	19.8151	5.15044	0.673005
											4690050291P02-030	110.997	19.8151	7.94618	0.673005
5	无	有	4690050291	文昌市七洲洋南沙滩	海南省	文昌市	翁田镇、昌洒镇、龙楼镇	4690050291P03	1	73.19	4690050291P03-031	110.999	19.7742	0	0.986005	0.0708035	0.2132	2.22972	0.63	-0.28	1.03	286	1.89252	1.40766	87	E	0.303976	1.35181	5.64847	1.22727	11.3665	2.59757	1.54206	1.37891	5.22283
											4690050291P03-032	110.999	19.7742	1.08635	0.923005
											4690050291P03-033	110.999	19.7742	2.12096	0.793005
											4690050291P03-034	110.999	19.7742	2.76981	0.818005
											4690050291P03-035	110.999	19.7742	2.65524	0.798005
6	无	有	4690050401	文昌市大陆湾沙滩	海南省	文昌市	龙楼镇、东郊镇	4690050401P01	146	51.3	4690050401P01-016	110.975	19.6312	0	0.861005	0.0461852	0.1929	2.37407	0.59	-0.15	0.94	287	1.61062	1.18805	89	E	0.475583	1.51906	5.80729	1.1006	12.2274	2.24516	1.46341	1.27843	5.3307
											4690050401P01-017	110.975	19.6312	1.14926	0.756005
											4690050401P01-018	110.975	19.6312	2.60394	0.562005
											4690050401P01-019	110.975	19.6312	4.67071	0.496005
											4690050401P01-020	110.975	19.6312	6.02349	0.366005
											4690050401P01-021	110.975	19.6312	9.72358	0.400005
											4690050401P01-022	110.975	19.6312	12.2983	0.293005
6	无	有	4690050401	文昌市大陆湾沙滩	海南省	文昌市	龙楼镇、东郊镇	4690050401P02	145	42.42	4690050401P02-017	110.909	19.574	0	0.971005	0.0527524	0.4432	1.17397	0.94	-0.07	0.86	287	1.61062	1.18805	89	E	0.475583	1.51906	5.80729	1.1006	4.12436	6.65617	1.46341	1.27843	5.3307
											4690050401P02-018	110.909	19.574	2.38646	0.772005
											4690050401P02-019	110.909	19.574	3.9524	0.668005
											4690050401P02-020	110.909	19.574	5.59305	0.645005
											4690050401P02-021	110.909	19.574	6.7485	0.615005
9	无	有	4690060031	万宁市正门海沙滩	海南省	万宁市	龙滚镇	4690060031P03	272	53.94	4690060031P03-023	110.533	19.0221	0	0.930605	0.173492	0.6491	0.623487	0.7	-0.03	1.08	293	1.31957	0.977626	86	E	0.430545	1.36594	6.25407	0.97161	2.47358	10.0797	1.35813	1.15201	5.44714
											4690060031P03-024	110.533	19.0221	1.41203	0.638605
											4690060031P03-025	110.533	19.0221	1.81565	0.615605
10	无	有	4690060091	万宁市乌场港西沙滩	海南省	万宁市	万城镇	4690060091P01	269	130.4	4690060091P01-036	110.474	18.7739	0	0.733605	0.0183873	0.172	2.53952	0.36	-0.01	1.04	295	1.44224	1.05795	86	E	0.443941	1.3844	6.22943	1.06448	13.044	1.88952	1.35488	1.14332	5.49717
											4690060091P01-037	110.474	18.7739	4.13842	0.673605
											4690060091P01-038	110.474	18.7739	6.78884	0.586605
											4690060091P01-039	110.474	18.7738	9.00464	0.553605
											4690060091P01-040	110.474	18.7738	11.561	0.449605
											4690060091P01-041	110.474	18.7738	12.5843	0.490605
											4690060091P01-042	110.474	18.7738	13.7051	0.481605
10	无	有	4690060091	万宁市乌场港西沙滩	海南省	万宁市	万城镇	4690060091P02	325	45.47	4690060091P02-019	110.461	18.7642	0	0.745605	0.0411357	0.2649	1.91648	0.48	-0.23	1.26	295	1.44224	1.05795	86	E	0.443941	1.3844	6.22943	1.06448	7.0185	3.51169	1.35488	1.14332	5.49717
											4690060091P02-020	110.461	18.7642	1.61757	0.642605
											4690060091P02-021	110.461	18.7641	3.56008	0.572605
											4690060091P02-022	110.461	18.7641	5.40947	0.537605
											4690060091P02-023	110.461	18.7641	8.10543	0.400605
											4690060091P02-024	110.461	18.7641	9.38358	0.359605
10	无	有	4690060091	万宁市乌场港西沙滩	海南省	万宁市	万城镇	4690060091P03	330	45.54	4690060091P03-023	110.458	18.7588	0	0.875605	0.172426	0.4131	1.27544	0.66	-0.05	0.91	295	1.44224	1.05795	86	E	0.443941	1.3844	6.22943	1.06448	4.01785	6.13433	1.35488	1.14332	5.49717
											4690060091P03-024	110.458	18.7588	1.74924	0.599605
											4690060091P03-025	110.458	18.7588	2.97704	0.484605
											4690060091P03-026	110.458	18.7588	3.60666	0.251605
											4690060091P03-027	110.458	18.7588	3.89152	0.204605
10	无	有	4690060091	万宁市乌场港西沙滩	海南省	万宁市	万城镇	4690060091P04	338	46.32	4690060091P04-021	110.453	18.7468	0	0.752605	0.175008	0.58	0.785875	0.48	0	1.19	295	1.44224	1.05795	86	E	0.443941	1.3844	6.22943	1.06448	2.7507	8.9602	1.35488	1.14332	5.49717
											4690060091P04-022	110.453	18.7468	1.32462	0.587605
											4690060091P04-023	110.453	18.7468	2.24901	0.415605
											4690060091P04-024	110.453	18.7468	3.01823	0.236605
											4690060091P04-025	110.453	18.7468	3.55413	0.130605
12	无	有	4690280201	陵水黎族自治县陵水湾东沙滩	海南省	陵水黎族自治县	新村镇、英州镇	4690280201P01	255	56.83	4690280201P01-007	109.947	18.4147	0	0.794505	0.0459724	0.2645	1.91866	0.43	-0.13	0.96	301	1.39033	1.0155	113	ESE	0.485181	0.672974	5.77622	1.57137	4.64333	3.50457	0.884794	0.67488	5.43723
											4690280201P01-008	109.947	18.4147	1.4428	0.601505
											4690280201P01-009	109.947	18.4147	4.216	0.358505
											4690280201P01-010	109.947	18.4147	7.15253	0.070505
											4690280201P01-011	109.947	18.4147	9.84235	-0.129495
											4690280201P01-012	109.947	18.4146	11.656	-0.241495
											4690280201P01-013	109.947	18.4146	15.1293	-0.397495
											4690280201P01-014	109.947	18.4146	17.6248	-0.479495
											4690280201P01-015	109.947	18.4146	20.2662	-0.614495
											4690280201P01-016	109.947	18.4146	22.6388	-0.712495
											4690280201P01-017	109.947	18.4145	25.6149	-0.833495
											4690280201P01-018	109.947	18.4145	27.8946	-0.934495
											4690280201P01-019	109.947	18.4145	30.221	-0.983495
											4690280201P01-020	109.947	18.4145	33.0978	-1.00949
											4690280201P01-021	109.947	18.4144	34.6357	-0.968495
											4690280201P01-022	109.947	18.4144	36.41	-1.01749
											4690280201P01-023	109.947	18.4144	38.9621	-1.0705
											4690280201P01-024	109.947	18.4144	42.6309	-1.16549
											4690280201P01-025	109.947	18.4144	45.3316	-1.2895
12	无	有	4690280201	陵水黎族自治县陵水湾东沙滩	海南省	陵水黎族自治县	新村镇、英州镇	4690280201P02	275	136.16	4690280201P02-021	109.913	18.4156	0	0.788505	0.039219	0.1901	2.39517	0.38	-0.13	1.07	301	1.39033	1.0155	113	ESE	0.485181	0.672974	5.77622	1.57137	7.40664	2.19707	0.884794	0.67488	5.43723
											4690280201P02-022	109.913	18.4156	3.45714	0.403505
											4690280201P02-023	109.913	18.4155	6.84866	0.197505
											4690280201P02-024	109.913	18.4155	11.4872	-0.166495
											4690280201P02-025	109.913	18.4154	15.798	-0.423495
											4690280201P02-026	109.913	18.4154	19.581	-0.614495
											4690280201P02-027	109.913	18.4154	23.2481	-0.664495
											4690280201P02-028	109.913	18.4153	28.0019	-0.801495
											4690280201P02-029	109.913	18.4153	30.1064	-0.873495
											4690280201P02-030	109.913	18.4153	34.0262	-1.0065
											4690280201P02-031	109.913	18.4152	37.6797	-1.13449
											4690280201P02-032	109.913	18.4152	38.9357	-1.2365
											4690280201P02-033	109.913	18.4152	39.7373	-1.1685
											4690280201P02-034	109.913	18.4152	40.884	-1.18949
											4690280201P02-035	109.913	18.4152	41.3497	-1.2815
											4690280201P02-036	109.913	18.4152	41.9222	-1.21049
											4690280201P02-037	109.913	18.4152	42.8225	-1.33849
											4690280201P02-038	109.913	18.4152	43.8501	-1.2445
											4690280201P02-039	109.913	18.4152	45.1332	-1.2495
											4690280201P02-040	109.913	18.4152	46.4616	-1.20549
											4690280201P02-041	109.913	18.4152	48.2712	-1.2285
											4690280201P02-042	109.913	18.4151	50.4676	-1.25849
											4690280201P02-043	109.913	18.4151	52.4992	-1.29449
											4690280201P02-044	109.913	18.4151	54.8953	-1.34449
											4690280201P02-045	109.913	18.4151	55.7127	-1.39649
12	无	有	4690280201	陵水黎族自治县陵水湾东沙滩	海南省	陵水黎族自治县	新村镇、英州镇	4690280201P03	287	141.55	4690280201P03-021	109.898	18.4123	0	0.809505	0.0407678	0.4567	1.13068	0.72	0.08	0.9	301	1.39033	1.0155	113	ESE	0.485181	0.672974	5.77622	1.57137	2.36232	6.88851	0.884794	0.67488	5.43723
											4690280201P03-022	109.898	18.4123	3.63578	0.456505
											4690280201P03-023	109.898	18.4123	5.40176	0.290505
											4690280201P03-024	109.898	18.4122	8.83013	0.090505
											4690280201P03-025	109.898	18.4122	13.4729	-0.138495
											4690280201P03-026	109.898	18.4122	17.5597	-0.328495
											4690280201P03-027	109.898	18.4121	20.2655	-0.458495
											4690280201P03-028	109.898	18.4121	23.4925	-0.624495
											4690280201P03-029	109.898	18.4121	26.5837	-0.747495
											4690280201P03-030	109.898	18.4121	29.4409	-0.911495
											4690280201P03-031	109.898	18.412	32.154	-1.0275
											4690280201P03-032	109.898	18.412	33.0542	-1.08649
											4690280201P03-033	109.898	18.412	33.84	-1.1645
											4690280201P03-034	109.898	18.412	36.4197	-1.2295
											4690280201P03-035	109.898	18.412	39.0425	-1.2485
											4690280201P03-036	109.898	18.412	40.2541	-1.20549
											4690280201P03-037	109.898	18.412	42.3043	-1.1715
											4690280201P03-038	109.898	18.4119	45.1778	-1.16949
											4690280201P03-039	109.898	18.4119	49.4568	-1.17849
											4690280201P03-040	109.898	18.4119	53.3569	-1.2855
											4690280201P03-041	109.898	18.4118	56.5243	-1.3865
											4690280201P03-042	109.898	18.4118	58.6285	-1.49249
											4690280201P03-043	109.898	18.4118	60.5007	-1.63349
											4690280201P03-044	109.898	18.4118	61.699	-1.58549
											4690280201P03-045	109.898	18.4118	62.5264	-1.66749
											4690280201P03-046	109.898	18.4118	63.5551	-1.7815
12	无	有	4690280201	陵水黎族自治县陵水湾东沙滩	海南省	陵水黎族自治县	新村镇、英州镇	4690280201P04	295	144.48	4690280201P04-016	109.882	18.4061	0	0.864505	0.0354865	0.2555	1.9686	0.44	-0.06	0.96	301	1.39033	1.0155	113	ESE	0.485181	0.672974	5.77622	1.57137	4.86559	3.34448	0.884794	0.67488	5.43723
											4690280201P04-017	109.882	18.4061	3.26205	0.577505
											4690280201P04-018	109.882	18.4061	5.29191	0.381505
											4690280201P04-019	109.882	18.4061	8.69828	0.124505
											4690280201P04-020	109.882	18.406	11.9862	-0.260495
											4690280201P04-021	109.882	18.406	14.7477	-0.494495
											4690280201P04-022	109.882	18.406	17.5357	-0.606495
											4690280201P04-023	109.882	18.406	19.1217	-0.692495
											4690280201P04-024	109.882	18.406	20.8693	-0.754495
											4690280201P04-025	109.882	18.4059	23.6191	-0.887495
											4690280201P04-026	109.882	18.4059	26.9866	-1.1315
											4690280201P04-027	109.882	18.4059	29.7519	-1.29449
											4690280201P04-028	109.882	18.4059	31.7199	-1.4625
											4690280201P04-029	109.882	18.4059	32.6107	-1.63749
											4690280201P04-030	109.882	18.4059	34.8028	-1.73549
											4690280201P04-031	109.882	18.4058	36.3934	-1.86449
											4690280201P04-032	109.882	18.4058	39.7072	-1.98049
											4690280201P04-033	109.882	18.4058	42.6049	-2.02949
											4690280201P04-034	109.882	18.4058	45.7427	-2.06549
											4690280201P04-035	109.882	18.4057	49.3129	-2.10749
											4690280201P04-036	109.882	18.4057	50.9406	-2.14549
											4690280201P04-037	109.882	18.4057	59.7791	-2.18749
											4690280201P04-038	109.882	18.4057	60.7317	-2.2775
											4690280201P04-039	109.882	18.4056	66.2307	-2.06649
											4690280201P04-040	109.882	18.4056	67.6797	-1.72849
											4690280201P04-041	109.882	18.4056	68.3245	-1.80449
											4690280201P04-042	109.882	18.4056	70.4129	-1.6405
											4690280201P04-043	109.882	18.4056	71.0693	-1.65749
14	无	有	4602040111	三亚市红塘湾东沙滩	海南省	三亚市	天涯区	4602040111P01	257	41.77	4602040111P01-019	109.334	18.303	0	0.835005	0.05778	0.3044	1.71596	0.41	-0.1	0.94	309	1.48867	1.08901	157	SSE	0.381078	0.486749	5.35857	2.31947	3.20395	4.21566	0.641814	0.483277	4.75179
											4602040111P01-020	109.334	18.303	2.14293	0.690005
											4602040111P01-021	109.334	18.303	3.96371	0.541005
											4602040111P01-022	109.334	18.303	5.66099	0.409005
											4602040111P01-023	109.334	18.303	7.08254	0.337005
											4602040111P01-024	109.334	18.303	8.73774	0.286005
											4602040111P01-025	109.334	18.3029	10.2762	0.245005
											4602040111P01-026	109.334	18.3029	12.7233	0.133005
											4602040111P01-027	109.334	18.3029	14.3739	-0.068995
											4602040111P01-028	109.334	18.3029	16.2214	-0.155995
											4602040111P01-029	109.334	18.3029	18.3628	-0.225995
14	无	有	4602040111	三亚市红塘湾东沙滩	海南省	三亚市	天涯区	4602040111P02	271	24.1	4602040111P02-013	109.31	18.3061	0	0.825005	0.128806	0.4149	1.26916	0.48	-0.03	1.04	309	1.48867	1.08901	157	SSE	0.381078	0.486749	5.35857	2.31947	2.19063	6.16571	0.641814	0.483277	4.75179
											4602040111P02-014	109.31	18.3061	2.03093	0.713005
											4602040111P02-015	109.31	18.3061	4.60898	0.422005
											4602040111P02-016	109.31	18.3061	6.63725	0.092005
											4602040111P02-017	109.31	18.3061	8.26823	-0.239995
16	无	有	4690270041	乐东黎族自治县龙腾湾沙滩	海南省	乐东黎族自治县	利国镇，黄流镇，莺歌海镇	4690270041P01	248	43.5	4690270041P01-021	108.813	18.4735	0	0.898005	0.127461	0.4855	1.04246	0.96	-0.02	0.97	314	1.60638	1.20308	158	SSE	0.424217	0.495831	3.92159	2.37601	2.13939	7.38056	0.676083	0.543316	4.28175
											4690270041P01-022	108.813	18.4735	3.23698	0.559005
											4690270041P01-023	108.813	18.4735	5.45792	0.182005
											4690270041P01-024	108.813	18.4735	6.21367	0.106005
16	无	有	4690270041	乐东黎族自治县龙腾湾沙滩	海南省	乐东黎族自治县	利国镇，黄流镇，莺歌海镇	4690270041P02	260	48.38	4690270041P02-017	108.78	18.4855	0	0.902005	0.0694723	0.6217	0.68571	0.71	0.27	1.01	314	1.60638	1.20308	158	SSE	0.424217	0.495831	3.92159	2.37601	1.63806	9.63939	0.676083	0.543316	4.28175
											4690270041P02-018	108.78	18.4855	1.89781	0.755005
											4690270041P02-019	108.78	18.4855	3.94563	0.619005
											4690270041P02-020	108.78	18.4854	6.21187	0.383005
											4690270041P02-021	108.78	18.4854	8.2264	0.034005
											4690270041P02-022	108.78	18.4854	9.3466	5e-06
											4690270041P02-023	108.78	18.4854	11.0461	-0.014995
											4690270041P02-024	108.78	18.4854	12.7533	0.016005
16	无	有	4690270041	乐东黎族自治县龙腾湾沙滩	海南省	乐东黎族自治县	利国镇，黄流镇，莺歌海镇	4690270041P04	269	39.26	4690270041P04-017	108.715	18.4944	0	0.855005	0.115758	0.7964	0.328435	0.58	0.14	1.07	314	1.60638	1.20308	158	SSE	0.424217	0.495831	3.92159	2.37601	1.27633	12.3713	0.676083	0.543316	4.28175
											4690270041P04-018	108.715	18.4944	1.60693	0.697005
											4690270041P04-019	108.715	18.4944	4.07723	0.476005
											4690270041P04-020	108.715	18.4944	5.70995	0.210005
											4690270041P04-021	108.715	18.4943	7.89095	-0.107995
											4690270041P04-022	108.715	18.4943	9.97117	-0.309995
											4690270041P04-023	108.715	18.4943	11.2736	-0.449995
17	无	有	4690270081	乐东黎族自治县龙沐湾沙滩	海南省	乐东黎族自治县	佛罗镇，尖峰镇	4690270081P01	336	31.55	4690270081P01-011	108.687	18.585	0	1.05001	0.139654	0.4174	1.2605	1.33	-0.41	0.62	316	2.03923	1.45957	181	S	0.174138	0.42272	2.87486	3.57315	2.72873	6.20928	0.570708	0.495648	3.36831
											4690270081P01-012	108.687	18.585	1.48003	0.750005
											4690270081P01-013	108.687	18.585	2.9266	0.496005
											4690270081P01-014	108.687	18.5851	4.63648	0.250005
											4690270081P01-015	108.687	18.5851	6.17804	-0.012995
											4690270081P01-016	108.687	18.5851	7.98514	-0.224995
											4690270081P01-017	108.687	18.5851	8.97614	-0.361995
											4690270081P01-018	108.687	18.5851	10.5636	-0.543995
											4690270081P01-019	108.687	18.5851	12.0288	-0.699995
											4690270081P01-020	108.687	18.5851	13.1398	-0.882995
											4690270081P01-021	108.687	18.5851	14.3076	-0.966995
											4690270081P01-022	108.687	18.5851	15.3235	-1.09
17	无	有	4690270081	乐东黎族自治县龙沐湾沙滩	海南省	乐东黎族自治县	佛罗镇，尖峰镇	4690270081P02	344	44.87	4690270081P02-015	108.696	18.6042	0	1.085	0.139331	0.6156	0.699935	0.96	-0.01	0.76	316	2.03923	1.45957	181	S	0.174138	0.42272	2.87486	3.57315	1.77594	9.54057	0.570708	0.495648	3.36831
											4690270081P02-016	108.696	18.6042	2.02435	0.826005
											4690270081P02-017	108.696	18.6042	3.72805	0.607005
											4690270081P02-018	108.696	18.6042	5.58233	0.376005
											4690270081P02-019	108.696	18.6042	7.1126	0.169005
											4690270081P02-020	108.696	18.6042	8.62476	-0.044995
											4690270081P02-021	108.696	18.6042	9.39551	-0.162995
											4690270081P02-022	108.696	18.6042	10.8653	-0.397995
											4690270081P02-023	108.696	18.6042	11.8352	-0.479995
											4690270081P02-024	108.696	18.6042	13.3712	-0.638995
											4690270081P02-025	108.696	18.6042	14.4542	-0.851995
											4690270081P02-026	108.696	18.6042	15.3304	-1.05099
17	无	有	4690270081	乐东黎族自治县龙沐湾沙滩	海南省	乐东黎族自治县	佛罗镇，尖峰镇	4690270081P03	188	88.63	4690270081P03-022	108.701	18.6294	0	1.02201	0.149546	0.5493	0.864334	0.83	0.03	0.87	316	2.03923	1.45957	181	S	0.174138	0.42272	2.87486	3.57315	2.00504	8.45042	0.570708	0.495648	3.36831
											4690270081P03-023	108.701	18.6294	1.69773	0.810005
											4690270081P03-024	108.701	18.6294	3.78237	0.498005
											4690270081P03-025	108.701	18.6294	5.68302	0.230005
											4690270081P03-026	108.701	18.6294	6.80152	0.041005
											4690270081P03-027	108.701	18.6294	8.85169	-0.300995
											4690270081P03-028	108.701	18.6294	10.6947	-0.496995
											4690270081P03-029	108.701	18.6294	11.8796	-0.736995
											4690270081P03-030	108.701	18.6294	12.9199	-0.892995
											4690270081P03-031	108.7	18.6294	13.935	-1.1
											4690270081P03-032	108.7	18.6294	14.758	-1.185
17	无	有	4690270081	乐东黎族自治县龙沐湾沙滩	海南省	乐东黎族自治县	佛罗镇，尖峰镇	4690270081P04	185	56.45	4690270081P04-017	108.703	18.6674	0	1.13501	0.118555	0.447	1.16165	0.61	0.01	1.18	316	2.03923	1.45957	181	S	0.174138	0.42272	2.87486	3.57315	2.52076	6.72157	0.570708	0.495648	3.36831
											4690270081P04-018	108.703	18.6674	2.77277	0.960005
											4690270081P04-019	108.703	18.6674	4.91296	0.738005
											4690270081P04-020	108.703	18.6674	6.67443	0.575005
											4690270081P04-021	108.703	18.6674	8.69138	0.318005
											4690270081P04-022	108.703	18.6674	10.2185	0.158005
											4690270081P04-023	108.703	18.6674	12.4615	-0.177995
											4690270081P04-024	108.703	18.6674	14.2394	-0.443995
											4690270081P04-025	108.703	18.6674	15.6142	-0.662995
											4690270081P04-026	108.703	18.6674	16.474	-0.783995
											4690270081P04-027	108.703	18.6674	17.4552	-0.910995
											4690270081P04-028	108.703	18.6674	18.3391	-1.05899
											4690270081P04-029	108.703	18.6674	19.6956	-1.19999
18	无	有	4690070031	东方市感恩河口北沙滩	海南省	东方市	感城镇，新龙镇	4690070031P01	146	29..28	4690070031P01-009	108.64	18.8754	0	1.326	0.133788	0.9797	0.0295881	0.47	-0.13	1.06	317	2.50436	1.73423	356	N	0.245755	0.734566	3.47321	4.19723	1.21296	15.0537	0.596669	0.531995	3.26771
											4690070031P01-010	108.64	18.8754	1.42437	1.16101
											4690070031P01-011	108.64	18.8754	2.91045	0.980005
											4690070031P01-012	108.64	18.8755	4.31543	0.874005
											4690070031P01-013	108.64	18.8755	5.72525	0.707005
											4690070031P01-014	108.64	18.8755	6.93249	0.606005
											4690070031P01-015	108.64	18.8755	8.34694	0.452005
											4690070031P01-016	108.64	18.8755	9.61924	0.188005
											4690070031P01-017	108.64	18.8755	11.2535	-0.038995
											4690070031P01-018	108.64	18.8755	12.616	-0.315995
											4690070031P01-019	108.64	18.8755	13.9468	-0.558995
											4690070031P01-020	108.64	18.8755	15.4499	-0.685995
											4690070031P01-021	108.64	18.8755	16.8197	-0.875995
											4690070031P01-022	108.64	18.8755	18.4098	-1.13699
18	无	有	4690070031	东方市感恩河口北沙滩	海南省	东方市	感城镇，新龙镇	4690070031P02	167	44.95	4690070031P02-016	108.652	18.8959	0	1.28301	0.136772	0.5051	0.985359	0.65	0.22	1.04	317	2.50436	1.73423	356	N	0.245755	0.734566	3.47321	4.19723	2.36747	7.71266	0.596669	0.531995	3.26771
											4690070031P02-017	108.652	18.8959	1.86817	1.124
											4690070031P02-018	108.652	18.8959	3.66717	1.03801
											4690070031P02-019	108.652	18.8959	5.20729	0.844005
											4690070031P02-020	108.652	18.8959	6.12291	0.651005
											4690070031P02-021	108.652	18.8959	7.24664	0.447005
											4690070031P02-022	108.652	18.8959	8.37922	0.257005
											4690070031P02-023	108.652	18.8959	9.67159	0.081005
											4690070031P02-024	108.652	18.8959	10.8718	-0.112995
											4690070031P02-025	108.652	18.8959	11.2727	-0.169995
											4690070031P02-026	108.652	18.8959	12.3824	-0.315995
											4690070031P02-027	108.652	18.8959	13.409	-0.513995
											4690070031P02-028	108.652	18.8959	14.5329	-0.692995
											4690070031P02-029	108.652	18.8959	16.1098	-0.867995
											4690070031P02-030	108.652	18.8959	17.277	-1.08
20	无	有	4690260071	昌江黎族自治县双塘湾沙滩	海南省	昌江黎族自治县	海尾镇	4690260071P01	130	118.93	4690260071P01-028	108.817	19.4382	0	1.805	0.0881816	0.5385	0.892982	0.64	0.01	1	321	3.21727	2.1867	23	NNE	0.243856	0.42489	2.94947	5.45021	2.23022	8.26914	0.590302	0.530363	3.20085
											4690260071P01-029	108.817	19.4382	3.78751	1.407
											4690260071P01-030	108.817	19.4382	4.74347	1.33
											4690260071P01-031	108.817	19.4382	6.91739	1.108
											4690260071P01-032	108.817	19.4382	8.81472	0.943005
											4690260071P01-033	108.817	19.4382	10.6645	0.810005
											4690260071P01-034	108.817	19.4382	11.7773	0.696005
											4690260071P01-035	108.817	19.4382	13.0935	0.598005
											4690260071P01-036	108.817	19.4383	14.8293	0.506005
											4690260071P01-037	108.817	19.4383	15.9444	0.399005
20	无	有	4690260071	昌江黎族自治县双塘湾沙滩	海南省	昌江黎族自治县	海尾镇	4690260071P02	126	43.24	4690260071P02-021	108.87	19.4581	0	1.73801	0.1006	0.517	0.951764	0.38	0.09	1.12	322	3.32257	2.26355	243	WSW	0.254193	0.377712	3.11198	6.15007	2.15563	7.91324	0.540249	0.477279	3.16713
											4690260071P02-022	108.87	19.4581	0.812748	1.63901
											4690260071P02-023	108.87	19.4581	1.53368	1.53201
											4690260071P02-024	108.87	19.4581	2.49262	1.43701
											4690260071P02-025	108.87	19.4581	3.56129	1.31201
											4690260071P02-026	108.87	19.4581	4.91069	1.157
											4690260071P02-027	108.87	19.4581	6.41152	1.09301
23	无	有	4690240121	临高县龙波湾沙滩	海南省	临高县	博厚镇	4690240121P01	42	51.99	4690240121P01-016	109.753	19.9704	0	1.755	0.0486021	1.7364	-0.796099	1.01	0.06	0.83	333	3.12595	2.11846	67	ENE	0.430229	0.215218	3.00281	9.04227	0.44928	24.5843	0.345705	0.274776	3.1299
											4690240121P01-017	109.753	19.9705	2.4804	1.41101
											4690240121P01-018	109.753	19.9705	3.46248	1.27801
											4690240121P01-019	109.753	19.9705	5.98371	1.07601
											4690240121P01-020	109.753	19.9705	8.05426	1.045
											4690240121P01-021	109.754	19.9705	10.9341	0.999005
											4690240121P01-022	109.754	19.9705	14.5652	0.901005
											4690240121P01-023	109.754	19.9705	16.9429	0.789005
											4690240121P01-024	109.754	19.9705	19.2153	0.727005
											4690240121P01-025	109.754	19.9705	20.7655	0.697005
											4690240121P01-026	109.754	19.9706	23.183	0.628005
											4690240121P01-027	109.754	19.9706	25.2664	0.527005
23	无	有	4690240121	临高县龙波湾沙滩	海南省	临高县	博厚镇	4690240121P02	94	98.29	4690240121P02-028	109.779	19.9649	0	1.806	0.0305287	0.7578	0.400111	0.61	0.17	1.19	333	3.12595	2.11846	67	ENE	0.430229	0.215218	3.00281	9.04227	0.937378	11.7831	0.345705	0.274776	3.1299
											4690240121P02-029	109.779	19.9649	1.27955	1.503
											4690240121P02-030	109.779	19.9649	3.72162	1.38501
											4690240121P02-031	109.779	19.965	6.31175	1.362
											4690240121P02-032	109.779	19.965	9.29681	1.372
											4690240121P02-033	109.779	19.965	12.0329	1.354
											4690240121P02-034	109.779	19.9651	15.8023	1.27001
											4690240121P02-035	109.779	19.9651	19.4192	1.2
											4690240121P02-036	109.779	19.9651	23.1043	1.128
											4690240121P02-037	109.779	19.9652	27.1002	1.05401
											4690240121P02-038	109.779	19.9652	31.582	0.955005
											4690240121P02-039	109.779	19.9652	35.3489	0.794005
											4690240121P02-040	109.779	19.9652	36.9861	0.713005
											4690240121P02-041	109.779	19.9652	37.5056	0.661005
