# Supplementary material
Source: ML conference proceedings conference paper supplement (https://openreview.net/forum?id=Cug26Y0RlT)
Supplement: supplementary_material [file beachdata3.xlsx]

## Sheet: 反射型
序号	类型	有无海堤	有无干滩	沙滩编码	沙滩代码	沙滩名称	地理位置			剖面号	剖面方位角(º)	剖面长度(m)	测点号	地理坐标		投影坐标		平均海平面y(m)	与起点距离x(m)		海滩坡度m	平均粒径（mm）	粒度系数(φ)				对应潮汐点位序号	年平均大潮潮差(m)	年平均潮差(m)	主波向数据					相对潮差RTR	无量纲沉降速率Ω	高潮泥沙沉降速度ωs(cm/s)	破波波高Hb(m)	深水波波高Hd(m)	年平均周期(s)
							省	市	区(县)					经度(º)	纬度(º)	X(m)	Y(m)						平均粒径(Mz)	分选系数(δ)	偏态(Sk)	峰态(Kg)				主波向度数（°）	主波向	频率	平均波高(m)	周期(s)
3	反射型	无	有	FJ121	3501280032	福州市屿头岛万叟沙澳沙滩	福建省	福州市	平潭县	3501280032P01	75	49.09	3501280032P01-014	119.605	25.6662	2.83991e+06	460392	2.881	0	2.80462	0.0961971	2.05068	-1.0361	0.842815	0.00505124	0.786874	148	5.60923	4.56875	40	NE	0.48	0.5	3.7	9.77446	0.635344	27.995	0.573866	0.509936	3.22642
													3501280032P01-015	119.606	25.6662	2.83991e+06	460393	2.765	0.78
													3501280032P01-016	119.606	25.6662	2.83991e+06	460394	2.643	1.9
													3501280032P01-017	119.606	25.6662	2.83991e+06	460395	2.462	3.24
													3501280032P01-018	119.606	25.6662	2.83991e+06	460397	2.291	4.52
													3501280032P01-019	119.606	25.6662	2.83991e+06	460398	2.153	5.79
													3501280032P01-020	119.606	25.6662	2.83991e+06	460399	1.993	7.21
													3501280032P01-021	119.606	25.6662	2.83991e+06	460401	1.828	8.91
													3501280032P01-022	119.606	25.6662	2.83991e+06	460402	1.681	10.24
													3501280032P01-023	119.606	25.6662	2.83991e+06	460403	1.581	11.58
													3501280032P01-024	119.606	25.6662	2.83991e+06	460405	1.418	13.08
													3501280032P01-025	119.606	25.6662	2.83991e+06	460406	1.293	14.47
													3501280032P01-026	119.606	25.6662	2.83991e+06	460408	1.201	15.8
													3501280032P01-027	119.606	25.6662	2.83991e+06	460409	1.073	17.2
													3501280032P01-028	119.606	25.6662	2.83991e+06	460410	1.021	18.29
													3501280032P01-029	119.606	25.6662	2.83991e+06	460411	0.898	19.74
													3501280032P01-030	119.606	25.6662	2.83991e+06	460413	0.759	21.1
													3501280032P01-031	119.606	25.6662	2.83991e+06	460414	0.653	22.6
													3501280032P01-032	119.606	25.6662	2.83991e+06	460416	0.53	24.06
													3501280032P01-033	119.606	25.6662	2.83991e+06	460417	0.393	25.53
													3501280032P01-034	119.606	25.6662	2.83991e+06	460418	0.261	26.89
													3501280032P01-035	119.606	25.6662	2.83992e+06	460420	0.056	29.13
													3501280032P01-036	119.606	25.6662	2.83992e+06	460422	-0.144	31.02
9	反射型	无	有	FJ129	3501280112	福州市桃澳底澳沙滩	福建省	福州市	平潭县	3501280112P01	258	66.3	3501280112P01-010	119.748	25.6378	2.83673e+06	474704	2.872	0	2.80287	0.0987407	1.56886	-0.64972	1.39832	0.225539	0.580496	147	5.60574	4.55496	65	ENE	0.433182	1.149	5.043	4.58055	1.2089	22.6516	1.22381	1.11659	4.46916
													3501280112P01-011	119.748	25.6378	2.83673e+06	474702	2.582	2.18
													3501280112P01-012	119.748	25.6378	2.83673e+06	474700	2.306	4.23
													3501280112P01-013	119.748	25.6378	2.83673e+06	474698	1.996	6.33
													3501280112P01-014	119.748	25.6378	2.83673e+06	474696	1.734	8.26
													3501280112P01-015	119.748	25.6378	2.83673e+06	474694	1.438	10.64
													3501280112P01-016	119.748	25.6378	2.83673e+06	474692	1.14	13.14
													3501280112P01-017	119.748	25.6378	2.83673e+06	474689	0.852	15.7
													3501280112P01-018	119.748	25.6378	2.83673e+06	474686	0.553	18.6
													3501280112P01-019	119.748	25.6378	2.83673e+06	474684	0.341	21.28
													3501280112P01-020	119.748	25.6378	2.83673e+06	474681	0.041	23.98
													3501280112P01-021	119.748	25.6377	2.83673e+06	474679	-0.154	26.43
													3501280112P01-022	119.748	25.6377	2.83673e+06	474676	-0.392	29.08
													3501280112P01-023	119.748	25.6377	2.83673e+06	474674	-0.537	31.14
													3501280112P01-024	119.748	25.6377	2.83673e+06	474672	-0.708	33.48
													3501280112P01-025	119.748	25.6377	2.83672e+06	474669	-0.89	35.89
													3501280112P01-026	119.748	25.6377	2.83672e+06	474667	-1.096	38.66
													3501280112P01-027	119.748	25.6377	2.83672e+06	474664	-1.357	41.3
													3501280112P01-028	119.748	25.6377	2.83672e+06	474663	-1.417	42.68
15	反射型	无	无	FJ135	3501280172	福州市岱峰村沙滩	福建省	福州市	平潭县	3501280172P01	145	63.15	3501280172P01-009	119.778	25.6519	2.83829e+06	477752	2.924	0	2.79113	0.0873664	0.334097	1.58166	0.822248	-0.126355	1.00879	151	5.58227	4.52	50	NE	0.36589	1.641	4.689	3.92577	6.40509	4.74401	1.42196	1.31632	4.67968
													3501280172P01-010	119.778	25.6519	2.83829e+06	477753	2.731	1.66
													3501280172P01-011	119.778	25.6519	2.83829e+06	477754	2.547	3.35
													3501280172P01-012	119.778	25.6519	2.83828e+06	477755	2.351	5.28
													3501280172P01-013	119.778	25.6518	2.83828e+06	477756	2.123	7.31
													3501280172P01-014	119.778	25.6518	2.83828e+06	477757	1.841	9.26
													3501280172P01-015	119.778	25.6518	2.83828e+06	477758	1.602	11.52
													3501280172P01-016	119.779	25.6518	2.83828e+06	477760	1.063	15.35
													3501280172P01-017	119.779	25.6518	2.83827e+06	477762	0.854	18.82
													3501280172P01-018	119.779	25.6517	2.83827e+06	477764	0.513	22.23
													3501280172P01-019	119.779	25.6517	2.83827e+06	477767	0.029	26.18
													3501280172P01-020	119.779	25.6517	2.83826e+06	477769	-0.465	30.72
													3501280172P01-021	119.779	25.6516	2.83826e+06	477773	-0.824	36.87
													3501280172P01-022	119.779	25.6516	2.83825e+06	477777	-1.277	44.01
													3501280172P01-023	119.779	25.6515	2.83825e+06	477780	-1.439	49.39
44	反射型	无	有	FJ161	3501280462	福州市风球山沙滩	福建省	福州市	平潭县	3501280462P01	174	86.07	3501280462P01-020	119.769	25.4031	2.81072e+06	476715	2.772	0	2.76775	0.0995259	1.79193	-0.841516	0.829427	-0.0353687	0.863195	155	5.5355	4.48692	69	ENE	0.516718	1.358	4.653	3.88312	1.18447	25.2061	1.42553	1.30725	4.77472
													3501280462P01-021	119.769	25.4031	2.81072e+06	476715	2.598	1.54
													3501280462P01-022	119.769	25.403	2.81072e+06	476716	2.43	2.97
													3501280462P01-023	119.769	25.403	2.81072e+06	476716	2.246	4.7
													3501280462P01-024	119.769	25.403	2.81072e+06	476716	2.08	6.19
													3501280462P01-025	119.769	25.403	2.81072e+06	476716	1.977	7.14
													3501280462P01-026	119.769	25.403	2.81072e+06	476716	1.813	8.59
													3501280462P01-027	119.769	25.403	2.81071e+06	476716	1.64	10.11
													3501280462P01-028	119.769	25.403	2.81071e+06	476716	1.446	11.52
													3501280462P01-029	119.769	25.403	2.81071e+06	476717	1.306	12.63
													3501280462P01-030	119.769	25.4029	2.81071e+06	476717	1.143	13.96
													3501280462P01-031	119.769	25.4029	2.81071e+06	476717	0.957	15.45
													3501280462P01-032	119.769	25.4029	2.81071e+06	476717	0.847	16.78
													3501280462P01-033	119.769	25.4029	2.81071e+06	476717	0.701	18.11
													3501280462P01-034	119.769	25.4029	2.81071e+06	476717	0.547	19.58
													3501280462P01-035	119.769	25.4029	2.8107e+06	476717	0.398	21.08
													3501280462P01-036	119.769	25.4029	2.8107e+06	476718	0.277	22.28
													3501280462P01-037	119.769	25.4029	2.8107e+06	476718	0.064	24.1
													3501280462P01-038	119.769	25.4028	2.8107e+06	476718	-0.2	26.98
													3501280462P01-039	119.769	25.4028	2.81069e+06	476718	-0.447	30.36
													3501280462P01-040	119.769	25.4028	2.81069e+06	476719	-0.647	33.34
													3501280462P01-041	119.769	25.4027	2.81069e+06	476719	-0.797	35.86
46	反射型	无	有	FJ163	3501280482	福州市山岐澳沙滩	福建省	福州市	平潭县	3501280482P08	211	60.46	3501280482P08-011	119.74	25.4158	2.81214e+06	473804	2.931	0	2.79183	0.106275	0.357555	1.48376	0.742303	-0.411668	1.37052	150	5.58365	4.53694	68	ENE	0.1946	0.715	3.028	9.36958	3.69176	5.15963	0.595935	0.54286	3.12858
													3501280482P08-012	119.74	25.4158	2.81214e+06	473803	2.677	2.23
													3501280482P08-013	119.74	25.4158	2.81214e+06	473802	2.411	4.58
													3501280482P08-014	119.74	25.4158	2.81214e+06	473801	2.128	6.89
													3501280482P08-015	119.74	25.4158	2.81214e+06	473799	1.852	9.33
													3501280482P08-016	119.74	25.4157	2.81213e+06	473798	1.611	11.52
													3501280482P08-017	119.74	25.4157	2.81213e+06	473797	1.364	13.59
													3501280482P08-018	119.74	25.4157	2.81213e+06	473796	1.107	15.84
													3501280482P08-019	119.74	25.4157	2.81213e+06	473795	0.855	18.25
													3501280482P08-020	119.74	25.4157	2.81213e+06	473793	0.592	20.84
													3501280482P08-021	119.74	25.4157	2.81212e+06	473792	0.372	23.07
													3501280482P08-022	119.739	25.4156	2.81212e+06	473791	0.144	25.5
													3501280482P08-023	119.739	25.4156	2.81212e+06	473790	-0.124	28.04
													3501280482P08-024	119.739	25.4156	2.81212e+06	473788	-0.362	30.37
													3501280482P08-025	119.739	25.4156	2.81212e+06	473787	-0.566	32.46
													3501280482P08-026	119.739	25.4156	2.81211e+06	473786	-0.687	34.14
													3501280482P08-027	119.739	25.4156	2.81211e+06	473786	-0.807	35.35
													3501280482P08-028	119.739	25.4156	2.81211e+06	473786	-0.846	35.38
47	反射型	无	有	FJ163-1	3501280492	福州市坪礁沙滩	福建省	福州市	平潭县	3501280492P06	173	69.47	3501280492P06-016	119.717	25.4232	2.81297e+06	471499	2.811	0	2.79183	0.110012	0.23586	2.084	0.500116	-0.24828	1.27474	150	5.58365	4.53694	68	ENE	0.1946	0.715	3.028	9.36958	6.35752	2.99615	0.595935	0.54286	3.12858
													3501280492P06-017	119.717	25.4232	2.81296e+06	471499	2.613	2.35
													3501280492P06-018	119.717	25.4232	2.81296e+06	471500	2.321	5.09
													3501280492P06-019	119.717	25.4231	2.81296e+06	471500	2.071	7.37
													3501280492P06-020	119.717	25.4231	2.81296e+06	471500	1.809	9.83
													3501280492P06-021	119.717	25.4231	2.81295e+06	471501	1.58	12.09
													3501280492P06-022	119.717	25.4231	2.81295e+06	471501	1.334	14.26
													3501280492P06-023	119.717	25.4231	2.81295e+06	471501	1.093	16.69
													3501280492P06-024	119.717	25.423	2.81295e+06	471501	0.88	19.25
													3501280492P06-025	119.717	25.423	2.81294e+06	471502	0.607	21.93
													3501280492P06-026	119.717	25.423	2.81294e+06	471502	0.355	24.37
													3501280492P06-027	119.717	25.423	2.81294e+06	471502	0.106	26.73
													3501280492P06-028	119.717	25.4229	2.81294e+06	471502	-0.209	29.16
													3501280492P06-029	119.717	25.4229	2.81294e+06	471503	-0.375	30.6
													3501280492P06-030	119.717	25.4229	2.81293e+06	471503	-0.643	32.47
													3501280492P06-031	119.717	25.4229	2.81293e+06	471503	-0.914	34.41
56	反射型	无	有	FJ174	3501280592	福州市钟门村沙滩	福建省	福州市	平潭县	3501280592P01	296	66.33	3501280592P01-017	119.723	25.6314	2.83603e+06	472217	2.841	0	2.80287	0.106073	1.62366	-0.699246	0.832211	-0.00246706	0.92426	147	5.60574	4.55496	65	ENE	0.433182	1.149	5.043	4.58055	1.17559	23.2934	1.22381	1.11659	4.46916
													3501280592P01-018	119.723	25.6314	2.83603e+06	472216	2.68	1.33
													3501280592P01-019	119.723	25.6314	2.83603e+06	472215	2.524	2.75
													3501280592P01-020	119.723	25.6315	2.83603e+06	472214	2.384	4.13
													3501280592P01-021	119.723	25.6315	2.83603e+06	472212	2.244	5.47
													3501280592P01-022	119.723	25.6315	2.83604e+06	472211	2.146	6.89
													3501280592P01-023	119.723	25.6315	2.83604e+06	472210	2.004	8.32
													3501280592P01-024	119.723	25.6315	2.83604e+06	472208	1.825	9.87
													3501280592P01-025	119.723	25.6315	2.83604e+06	472207	1.651	11.4
													3501280592P01-026	119.723	25.6315	2.83604e+06	472207	1.606	11.39
													3501280592P01-027	119.723	25.6315	2.83604e+06	472206	1.537	12.52
													3501280592P01-028	119.723	25.6315	2.83604e+06	472205	1.42	13.68
													3501280592P01-029	119.723	25.6315	2.83604e+06	472204	1.271	15.22
													3501280592P01-030	119.723	25.6315	2.83604e+06	472202	1.123	16.73
													3501280592P01-031	119.723	25.6315	2.83604e+06	472201	0.931	18.52
													3501280592P01-032	119.723	25.6315	2.83604e+06	472200	0.797	19.86
													3501280592P01-033	119.723	25.6315	2.83604e+06	472198	0.631	21.26
													3501280592P01-034	119.723	25.6315	2.83604e+06	472197	0.5	22.92
													3501280592P01-035	119.723	25.6315	2.83604e+06	472195	0.362	24.53
													3501280592P01-036	119.723	25.6315	2.83604e+06	472194	0.189	26.07
													3501280592P01-037	119.723	25.6315	2.83604e+06	472193	0.072	27.65
													3501280592P01-038	119.723	25.6316	2.83605e+06	472191	-0.126	29.3
													3501280592P01-039	119.723	25.6316	2.83605e+06	472190	-0.265	30.88
													3501280592P01-040	119.723	25.6316	2.83605e+06	472188	-0.42	32.42
													3501280592P01-041	119.723	25.6316	2.83605e+06	472187	-0.587	33.93
													3501280592P01-042	119.723	25.6316	2.83605e+06	472185	-0.766	35.61
													3501280592P01-043	119.723	25.6316	2.83605e+06	472184	-0.934	37.37
													3501280592P01-044	119.723	25.6316	2.83605e+06	472182	-1.136	39.09
													3501280592P01-045	119.723	25.6316	2.83605e+06	472181	-1.322	40.92
													3501280592P01-046	119.723	25.6316	2.83605e+06	472178	-1.611	43.36
													3501280592P01-047	119.723	25.6316	2.83605e+06	472177	-1.885	45.17
													3501280592P01-048	119.723	25.6316	2.83605e+06	472175	-2.158	46.94
64	反射型	无	有	FJ191	3501280762	福州市塘屿东猫尾沙滩	福建省	福州市	平潭县	3501280762P01	129	89.09	3501280762P01-018	119.69	25.3137	2.80084e+06	468752	2.97	0	2.77681	0.118128	1.76908	-0.823	0.67	0.112	0.941	158	5.55361	4.51268	68	ENE	0.509756	1.427	4.763	3.94928	9.81323	3.04189	1.40623	1.29385	4.71088
													3501280762P01-019	119.69	25.3137	2.80084e+06	468754	2.707	2.27
													3501280762P01-020	119.69	25.3137	2.80084e+06	468755	2.428	4.46
													3501280762P01-021	119.69	25.3137	2.80084e+06	468757	2.137	7.1
													3501280762P01-022	119.69	25.3137	2.80084e+06	468759	1.823	9.31
													3501280762P01-023	119.69	25.3137	2.80084e+06	468760	1.533	11.03
													3501280762P01-024	119.69	25.3137	2.80084e+06	468762	1.278	13.2
													3501280762P01-025	119.69	25.3136	2.80083e+06	468764	0.986	15.27
													3501280762P01-026	119.69	25.3136	2.80083e+06	468765	0.732	17.49
													3501280762P01-027	119.69	25.3136	2.80083e+06	468767	0.441	19.98
													3501280762P01-028	119.69	25.3136	2.80083e+06	468769	0.231	22.13
													3501280762P01-029	119.69	25.3136	2.80083e+06	468771	-0.008	24.25
													3501280762P01-030	119.69	25.3136	2.80083e+06	468772	-0.214	26.12
													3501280762P01-031	119.69	25.3136	2.80083e+06	468774	-0.454	28.41
													3501280762P01-032	119.69	25.3136	2.80083e+06	468775	-0.584	29.85
													3501280762P01-033	119.69	25.3136	2.80082e+06	468776	-0.685	31.36
													3501280762P01-034	119.69	25.3136	2.80082e+06	468777	-0.903	32.83
80	反射型	无	有	FJ203	3501810131	福清市可门村沙滩	福建省	福州市	福清市	3501810131P01	106	51.86	3501810131P01-010	119.665	25.4198	2.8126e+06	466290	2.889	0	2.79183	0.101541	0.715893	0.482184	0.486294	0.0524916	1.08548	150	5.58365	4.53694	68	ENE	0.1946	0.715	3.028	9.36958	1.71069	11.1347	0.595935	0.54286	3.12858
													3501810131P01-011	119.665	25.4198	2.8126e+06	466292	2.707	1.56
													3501810131P01-012	119.665	25.4198	2.8126e+06	466293	2.509	3.09
													3501810131P01-013	119.665	25.4198	2.8126e+06	466295	2.341	4.69
													3501810131P01-014	119.665	25.4198	2.8126e+06	466297	2.088	7.06
													3501810131P01-015	119.665	25.4198	2.8126e+06	466299	1.856	9.26
													3501810131P01-016	119.665	25.4198	2.8126e+06	466302	1.639	12.15
													3501810131P01-017	119.665	25.4197	2.81259e+06	466305	1.407	14.81
													3501810131P01-018	119.665	25.4197	2.81259e+06	466307	1.172	17.25
													3501810131P01-019	119.665	25.4197	2.81259e+06	466309	0.951	19.59
													3501810131P01-020	119.665	25.4197	2.81259e+06	466312	0.751	22.08
													3501810131P01-021	119.665	25.4197	2.81259e+06	466314	0.471	24.88
													3501810131P01-022	119.665	25.4197	2.81259e+06	466317	0.202	27.43
													3501810131P01-023	119.665	25.4197	2.81259e+06	466320	-0.139	30.44
													3501810131P01-024	119.665	25.4197	2.81259e+06	466322	-0.39	33.19
													3501810131P01-025	119.665	25.4197	2.81259e+06	466327	-1.05	38.56
83	反射型	无	有	FJ204	3501810161	福清市牛山沙滩	福建省	福州市	福清市	3501810161P01	93	52.303	3501810161P01-007	119.651	25.402	2.81063e+06	464840	2.866	0	2.79183	0.104967	1.28086	-0.357117	0.93653	-0.0774765	0.785472	150	5.58365	4.53694	68	ENE	0.1946	0.715	3.028	9.36958	0.996708	19.111	0.595935	0.54286	3.12858
													3501810161P01-008	119.651	25.402	2.81063e+06	464843	2.508	2.85
													3501810161P01-009	119.651	25.402	2.81063e+06	464846	2.133	5.75
													3501810161P01-010	119.651	25.402	2.81063e+06	464848	1.835	8.44
													3501810161P01-011	119.651	25.402	2.81063e+06	464851	1.514	11.33
													3501810161P01-012	119.651	25.402	2.81063e+06	464854	1.161	13.81
													3501810161P01-013	119.651	25.402	2.81063e+06	464857	0.765	16.84
													3501810161P01-014	119.651	25.402	2.81063e+06	464860	0.394	20.27
													3501810161P01-015	119.651	25.402	2.81063e+06	464864	0.016	23.75
													3501810161P01-016	119.651	25.402	2.81063e+06	464867	-0.309	26.9
													3501810161P01-017	119.651	25.402	2.81063e+06	464870	-0.603	30.23
													3501810161P01-018	119.651	25.402	2.81063e+06	464874	-0.827	33.78
													3501810161P01-019	119.651	25.402	2.81063e+06	464877	-1.104	36.83
													3501810161P01-020	119.651	25.402	2.81063e+06	464879	-1.273	38.86
													3501810161P01-021	119.651	25.402	2.81063e+06	464879	-1.356	39.46
													3501810161P01-022	119.651	25.402	2.81063e+06	464880	-1.444	40.5
139	反射型	无	有	FJ247	3503050272	莆田市南日岛山初村沙滩	福建省	莆田市	秀屿区	3503050272P02	356	67.52	3503050272P02-012	119.46	25.2457	2.79338e+06	445600	3.088	0	2.80994	0.117621	1.06108	-0.0855296	1.44728	0.14351	0.690837	163	5.61987	4.58429	44	NE	0.307352	0.855	2.987	8.42539	1.33428	16.1898	0.667016	0.629084	3.0878
													3503050272P02-013	119.46	25.2457	2.79339e+06	445600	2.595	4.42
													3503050272P02-014	119.46	25.2458	2.79339e+06	445599	2.022	9.05
													3503050272P02-015	119.46	25.2458	2.79339e+06	445599	1.528	13.16
													3503050272P02-016	119.46	25.2459	2.7934e+06	445599	0.939	17.94
													3503050272P02-017	119.46	25.2459	2.7934e+06	445599	0.333	23.2
													3503050272P02-018	119.46	25.2459	2.79341e+06	445598	0.095	25.53
													3503050272P02-019	119.46	25.2459	2.79341e+06	445598	-0.015	26.61
160	反射型	无	有	FJ267	3503050482	莆田市湄洲岛湄屿潮音沙滩	福建省	莆田市	秀屿区	3503050482P01	78	93.38	3503050482P01-024	119.151	25.0976	2.77714e+06	414383	2.814	0	2.78534	0.121039	1.40369	-0.489224	1.61182	0.262699	0.629952	169	5.57069	4.53443	71	ENE	0.421791	1.025	3.866	5.78186	1.14458	20.6574	0.963476	0.867171	4.07492
													3503050482P01-025	119.151	25.0976	2.77714e+06	414384	2.597	1.35
													3503050482P01-026	119.151	25.0976	2.77714e+06	414385	2.465	2.7
													3503050482P01-027	119.151	25.0976	2.77714e+06	414386	2.379	3.01
													3503050482P01-028	119.151	25.0976	2.77714e+06	414387	2.203	4.63
													3503050482P01-029	119.151	25.0976	2.77714e+06	414389	2.045	6.35
													3503050482P01-030	119.151	25.0976	2.77714e+06	414391	1.833	8.12
													3503050482P01-031	119.151	25.0976	2.77714e+06	414393	1.569	10.01
													3503050482P01-032	119.151	25.0976	2.77714e+06	414394	1.378	11.77
													3503050482P01-033	119.151	25.0976	2.77714e+06	414396	1.158	13.51
													3503050482P01-034	119.151	25.0976	2.77714e+06	414398	0.906	15.4
													3503050482P01-035	119.151	25.0977	2.77714e+06	414399	0.7	16.98
													3503050482P01-036	119.151	25.0977	2.77714e+06	414401	0.466	18.22
													3503050482P01-037	119.151	25.0977	2.77714e+06	414402	0.32	19.95
													3503050482P01-038	119.151	25.0977	2.77714e+06	414404	0.116	21.65
													3503050482P01-039	119.151	25.0977	2.77714e+06	414406	-0.137	23.39
													3503050482P01-040	119.151	25.0977	2.77714e+06	414408	-0.487	26.01
													3503050482P01-041	119.152	25.0977	2.77714e+06	414411	-0.757	29.06
165	反射型	无	有	FJ272	3503050532	莆田市湄洲岛日文坑沙滩	福建省	莆田市	秀屿区	3503050532P01	103	91.85	3503050532P01-020	119.13	25.0508	2.77196e+06	412224	3.092	0	2.78534	0.137061	1.6514	-0.723685	0.749815	-0.0326992	1.19586	169	5.57069	4.53443	71	ENE	0.421791	1.025	3.866	5.78186	1.00125	23.6146	0.963476	0.867171	4.07492
													3503050532P01-021	119.13	25.0508	2.77196e+06	412227	2.649	3.62
													3503050532P01-022	119.13	25.0508	2.77196e+06	412230	2.333	6.39
													3503050532P01-023	119.13	25.0508	2.77196e+06	412233	1.828	10
													3503050532P01-024	119.13	25.0508	2.77196e+06	412236	1.365	13.09
													3503050532P01-025	119.13	25.0508	2.77196e+06	412241	0.733	17.54
													3503050532P01-026	119.13	25.0507	2.77196e+06	412245	0.117	21.91
													3503050532P01-027	119.13	25.0507	2.77196e+06	412248	-0.317	25.26
171	反射型	无	有	FJ277	3503050582	莆田市湄洲岛黄金沙滩	福建省	莆田市	秀屿区	3503050582P04	228	46.26	3503050582P04-015	119.108	25.045	2.77134e+06	410030	2.932	0	2.76921	0.109971	0.215536	2.214	0.534	-0.228	1.896	170	5.53841	4.50402	88	E	0.515452	0.957	4.443	5.96056	3.14859	6.85428	0.929177	0.806261	4.30546
													3503050582P04-016	119.108	25.045	2.77133e+06	410029	2.716	1.23
													3503050582P04-017	119.108	25.045	2.77133e+06	410028	2.575	2.4
													3503050582P04-018	119.108	25.045	2.77133e+06	410027	2.414	3.55
													3503050582P04-019	119.108	25.045	2.77133e+06	410026	2.229	4.78
													3503050582P04-020	119.108	25.045	2.77133e+06	410025	2.044	6.18
													3503050582P04-021	119.108	25.045	2.77133e+06	410024	1.845	7.71
													3503050582P04-022	119.108	25.0449	2.77133e+06	410023	1.681	9.17
													3503050582P04-023	119.108	25.0449	2.77133e+06	410022	1.536	10.52
													3503050582P04-024	119.108	25.0449	2.77133e+06	410021	1.371	12.02
													3503050582P04-025	119.108	25.0449	2.77133e+06	410020	1.157	13.64
													3503050582P04-026	119.108	25.0449	2.77133e+06	410019	1.018	15.13
													3503050582P04-027	119.108	25.0449	2.77132e+06	410017	0.758	17.53
													3503050582P04-028	119.108	25.0449	2.77132e+06	410015	0.533	19.94
													3503050582P04-029	119.108	25.0449	2.77132e+06	410013	0.255	22.62
													3503050582P04-030	119.108	25.0448	2.77132e+06	410011	0.031	25.04
													3503050582P04-031	119.108	25.0448	2.77132e+06	410009	-0.306	28.71
211	反射型	无	有	FJ313	3505210261	惠安县崇武古城沙滩	福建省	泉州市	惠安县	3505210261P01	155	93.06	3505210261P01-018	118.93	24.8761	2.75276e+06	391921	2.827	0	2.68554	0.0779172	0.98927	0.0155638	0.444145	-0.110871	1.04234	174	5.37108	4.36204	91	E	0.552051	0.785	4.572	5.8903	1.29516	15.1887	0.911853	0.758977	4.63533
													3505210261P01-019	118.931	24.8761	2.75275e+06	391922	2.652	1.38
													3505210261P01-020	118.931	24.8761	2.75275e+06	391922	2.404	2.92
													3505210261P01-021	118.931	24.8761	2.75275e+06	391923	2.189	3.81
													3505210261P01-022	118.931	24.8761	2.75275e+06	391923	2.013	5.1
													3505210261P01-023	118.931	24.8761	2.75275e+06	391924	1.841	6.33
													3505210261P01-024	118.931	24.876	2.75275e+06	391924	1.595	7.73
													3505210261P01-025	118.931	24.876	2.75275e+06	391925	1.376	9.28
													3505210261P01-026	118.931	24.876	2.75275e+06	391926	1.101	11.09
													3505210261P01-027	118.931	24.876	2.75274e+06	391927	0.832	13.07
													3505210261P01-028	118.931	24.876	2.75274e+06	391927	0.527	14.8
													3505210261P01-029	118.931	24.876	2.75274e+06	391928	0.34	16.2
													3505210261P01-030	118.931	24.876	2.75274e+06	391929	0.173	17.65
													3505210261P01-031	118.931	24.876	2.75274e+06	391929	-0.028	19.06
													3505210261P01-032	118.931	24.8759	2.75274e+06	391930	-0.229	20.71
													3505210261P01-033	118.931	24.8759	2.75274e+06	391931	-0.413	22.23
													3505210261P01-034	118.931	24.8759	2.75273e+06	391932	-0.774	25.23
													3505210261P01-035	118.931	24.8757	2.75271e+06	391944	-2.243	55.3
													3505210261P01-036	118.931	24.8756	2.7527e+06	391949	-2.376	65.91
247	反射型	无	有	FJ341-2	3505820121	晋江市光渺村沙滩	福建省	泉州市	晋江市	3505820121P02	197	48.48	3505820121P02-015	118.507	24.6159	2.72432e+06	348799	2.506	0	2.45483	0.0958867	1.44029	-0.526362	0.627075	-0.0828362	0.959989	179	4.90966	3.99112	88	E	0.583483	0.976	5.003	5.04372	0.966585	21.1076	0.973421	0.81176	4.77114
													3505820121P02-016	118.507	24.6159	2.72432e+06	348798	2.305	1.38
													3505820121P02-017	118.507	24.6158	2.72432e+06	348798	2.104	2.82
													3505820121P02-018	118.507	24.6158	2.72432e+06	348798	1.9	4.23
													3505820121P02-019	118.507	24.6158	2.72432e+06	348797	1.76	5.45
													3505820121P02-020	118.507	24.6158	2.72432e+06	348797	1.598	6.93
													3505820121P02-021	118.507	24.6158	2.72432e+06	348796	1.404	8.91
													3505820121P02-022	118.507	24.6158	2.72431e+06	348796	1.245	10.93
													3505820121P02-023	118.507	24.6158	2.72431e+06	348795	1.028	13.05
													3505820121P02-024	118.507	24.6157	2.72431e+06	348794	0.898	15.29
													3505820121P02-025	118.507	24.6157	2.72431e+06	348794	0.753	17.36
													3505820121P02-026	118.507	24.6157	2.72431e+06	348793	0.657	18.73
													3505820121P02-027	118.507	24.6157	2.7243e+06	348793	0.468	20.93
													3505820121P02-028	118.507	24.6157	2.7243e+06	348792	0.207	23.26
259	反射型	无	有	FJ359	3506040032	漳州市浯屿岛西南沙滩	福建省	漳州市	龙海区	3506040032P01	239	49.93	3506040032P01-014	118.145	24.3257	2.69184e+06	616166	2.32	0	2.25459	0.0748857	0.398719	1.32656	1.26296	-0.536617	0.826694	183	4.50918	3.69058	92	E	0.53275	1.051	5.387	4.33407	3.48447	5.88354	1.0404	0.855365	5.07489
													3506040032P01-015	118.144	24.3257	2.69184e+06	616165	2.149	1.28
													3506040032P01-016	118.144	24.3257	2.69184e+06	616164	1.985	2.46
													3506040032P01-017	118.144	24.3257	2.69184e+06	616163	1.824	3.81
													3506040032P01-018	118.144	24.3257	2.69184e+06	616162	1.709	4.97
													3506040032P01-019	118.144	24.3257	2.69184e+06	616160	1.541	6.49
													3506040032P01-020	118.144	24.3257	2.69184e+06	616159	1.42	7.98
													3506040032P01-021	118.144	24.3257	2.69184e+06	616158	1.33	9.42
													3506040032P01-022	118.144	24.3256	2.69183e+06	616156	1.127	11.8
													3506040032P01-023	118.144	24.3256	2.69183e+06	616154	0.984	13.55
													3506040032P01-024	118.144	24.3256	2.69183e+06	616153	0.869	15.44
													3506040032P01-025	118.144	24.3256	2.69183e+06	616151	0.742	17.51
													3506040032P01-026	118.144	24.3256	2.69183e+06	616149	0.601	19.89
													3506040032P01-027	118.144	24.3256	2.69183e+06	616147	0.448	22.25
													3506040032P01-028	118.144	24.3256	2.69183e+06	616145	0.284	24.72
													3506040032P01-029	118.144	24.3256	2.69183e+06	616143	0.075	26.87
													3506040032P01-030	118.144	24.3256	2.69182e+06	616139	-0.155	31.22
													3506040032P01-031	118.144	24.3255	2.69182e+06	616137	-0.308	34.09
261	反射型	无	无	FJ360-1	3506040051	漳州市后石村沙滩	福建省	漳州市	龙海区	3506040051P01	65	21.86	3506040051P01-007	118.115	24.3143	2.69055e+06	613205	2.251	0	2.25459	0.132829	0.686373	0.542936	1.15096	-0.171049	1.27083	183	4.50918	3.69058	92	E	0.53275	1.051	5.387	4.33407	1.92112	10.6714	1.0404	0.855365	5.07489
													3506040051P01-008	118.115	24.3143	2.69055e+06	613206	2.127	1.12
													3506040051P01-009	118.115	24.3143	2.69056e+06	613207	1.994	2.2
													3506040051P01-010	118.115	24.3143	2.69056e+06	613208	1.864	3.17
													3506040051P01-011	118.115	24.3143	2.69056e+06	613208	1.786	3.72
													3506040051P01-012	118.115	24.3143	2.69056e+06	613209	1.659	4.68
													3506040051P01-013	118.115	24.3143	2.69056e+06	613210	1.495	5.84
													3506040051P01-014	118.115	24.3143	2.69056e+06	613211	1.368	6.66
													3506040051P01-015	118.115	24.3143	2.69056e+06	613211	1.273	7.46
													3506040051P01-016	118.115	24.3143	2.69056e+06	613212	1.143	8.31
													3506040051P01-017	118.115	24.3143	2.69056e+06	613213	1.011	9.19
													3506040051P01-018	118.115	24.3143	2.69056e+06	613214	0.848	10.21
													3506040051P01-019	118.115	24.3143	2.69056e+06	613215	0.705	11.36
													3506040051P01-020	118.115	24.3143	2.69056e+06	613216	0.524	12.71
													3506040051P01-021	118.115	24.3144	2.69056e+06	613218	0.306	14.48
													3506040051P01-022	118.115	24.3144	2.69056e+06	613219	0.143	15.87
287	反射型	无	有	FJ386	3506260022	东山县塔屿岛东沙滩	福建省	漳州市	东山县	3506260022P01	102	44.213	3506260022P01-020	117.553	23.7326	2.62578e+06	556339	1.751	0	1.56916	0.164333	1.414	-0.499783	0.707069	-0.216035	0.780476	187	3.13832	2.62971	165	SSE	0.391836	0.154	5.246	9.45142	0.380252	20.7842	0.332047	0.22551	4.20141
													3506260022P01-021	117.553	23.7326	2.62578e+06	556340	1.438	1.58
													3506260022P01-022	117.553	23.7326	2.62578e+06	556342	1.168	3.24
													3506260022P01-023	117.553	23.7326	2.62578e+06	556344	0.939	4.69
													3506260022P01-024	117.553	23.7326	2.62578e+06	556345	0.71	6.34
													3506260022P01-025	117.553	23.7326	2.62578e+06	556346	0.452	7.58
289	反射型	无	有	FJ388	3506260042	东山县塔屿岛浸月湾沙滩	福建省	漳州市	东山县	3506260042P01	282	32.74	3506260042P01-012	117.551	23.7339	2.62592e+06	556153	1.605	0	1.56916	0.0769133	1.75654	-0.81274	1.18104	0.368967	0.861143	187	3.13832	2.62971	165	SSE	0.391836	0.154	5.246	9.45142	0.318536	24.8111	0.332047	0.22551	4.20141
													3506260042P01-013	117.551	23.7339	2.62593e+06	556150	1.264	2.91
													3506260042P01-014	117.551	23.7339	2.62593e+06	556149	1.138	4.06
													3506260042P01-015	117.551	23.7339	2.62593e+06	556147	0.973	6.41
													3506260042P01-016	117.551	23.7339	2.62593e+06	556142	0.661	10.75
293	反射型	无	无		3506260092	？	福建省	漳州市	东山县	3506260092P01	212	38.44	3506260092P01-012	117.506	23.7203	2.62441e+06	551624	2.097	0	1.44574	0.0757606	1.15577	-0.208849	0.843459	-0.195565	1.21392	189	2.89148	2.42138	75	ENE	0.369476	1.306	4.835	2.30062	1.46632	17.4735	1.25683	1.10185	4.90532
													3506260092P01-013	117.506	23.7203	2.6244e+06	551623	1.421	1.65
													3506260092P01-014	117.506	23.7203	2.6244e+06	551621	1.373	5.82
													3506260092P01-015	117.506	23.7203	2.6244e+06	551619	1.159	9.8
													3506260092P01-016	117.506	23.7202	2.62439e+06	551617	0.916	13.12
													3506260092P01-017	117.506	23.7202	2.62439e+06	551615	0.455	17.73
													3506260092P01-018	117.506	23.7202	2.62439e+06	551613	-0.073	21.37
312	反射型	无	有	FJ409	3506240101	诏安县港仔尾村南沙滩	福建省	漳州市	诏安县	3506240101P01	114	38.45	3506240101P01-019	117.231	23.6051	2.61157e+06	523623	1.166	0	1.11638	0.116974	0.61458	0.702327	1.2905	-0.20399	1.08971	192	2.23275	1.85234	93	E	0.410611	0.944	4.456	2.46461	2.0347	9.52401	0.905925	0.749622	4.67489
													3506240101P01-020	117.231	23.6051	2.61157e+06	523622	0.993	1.38
													3506240101P01-021	117.231	23.6051	2.61157e+06	523621	0.788	3
													3506240101P01-022	117.231	23.6051	2.61157e+06	523619	0.552	5.18
													3506240101P01-023	117.231	23.6051	2.61157e+06	523617	0.375	7.01
													3506240101P01-024	117.231	23.6051	2.61157e+06	523615	0.104	8.98
313	反射型	无	有	FJ410	3506240111	诏安县港仔尾村西沙滩	福建省	漳州市	诏安县	3506240111P01	99	36.34	3506240111P01-016	117.23	23.6074	2.61183e+06	523498	1.211	0	1.11638	0.0980273	0.641741	0.639937	1.63948	-0.217086	0.719918	192	2.23275	1.85234	93	E	0.410611	0.944	4.456	2.46461	1.94524	9.96204	0.905925	0.749622	4.67489
													3506240111P01-017	117.23	23.6074	2.61183e+06	523497	1.005	1.44
													3506240111P01-018	117.23	23.6074	2.61183e+06	523495	0.787	3.31
													3506240111P01-019	117.23	23.6074	2.61183e+06	523493	0.594	5.24
													3506240111P01-020	117.23	23.6074	2.61183e+06	523491	0.359	8.03

## Sheet: 过渡型
序号	类型	有无海堤	有无干滩	沙滩编码	沙滩代码	沙滩名称	地理位置			剖面号	剖面方位角(º)	剖面长度(m)	测点号	地理坐标		投影坐标		平均海平面y(m)	与起点距离x(m)		海滩坡度m	平均粒径(mm)	粒度系数(φ)				对应潮汐点位序号	年平均大潮潮差(m)	年平均潮差(m)	主波向数据					相对潮差RTR	无量纲沉降速率Ω	高潮泥沙沉降速度ωs(cm/s)	破波波高Hb(m)	深水波波高Hd(m)	年平均周期(s)
							省	市	区(县)					经度(º)	纬度(º)	X(m)	Y(m)						平均粒径(Mz)	分选系数(δ)	偏态(Sk)	峰态(Kg)				主波向度数（°）	主波向	频率	平均波高(m)	周期(s)
7	过渡型	无	有	FJ127	3501280092	福州市六秀沙滩	福建省	福州市	平潭县	3501280092P01	29	146.78	3501280092P01-021	119.739	25.637	2.83665e+06	473749	2.863	0	2.80287	0.0563673	0.26334	1.925	0.519	-0.383	1.159	147	5.60574	4.55496	65	ENE	0.433182	1.149	5.043	4.58055	13.4721	2.03262	1.22381	1.11659	4.46916
													3501280092P01-022	119.739	25.6371	2.83665e+06	473750	2.682	2.42
													3501280092P01-023	119.739	25.6371	2.83666e+06	473752	2.433	5.58
													3501280092P01-024	119.739	25.6371	2.83666e+06	473753	2.172	9.1
													3501280092P01-025	119.739	25.6371	2.83666e+06	473755	1.911	12.58
													3501280092P01-026	119.739	25.6372	2.83666e+06	473757	1.664	15.76
													3501280092P01-027	119.739	25.6372	2.83667e+06	473758	1.42	19.05
													3501280092P01-028	119.739	25.6372	2.83667e+06	473760	1.182	22.38
													3501280092P01-029	119.739	25.6372	2.83667e+06	473761	0.986	25.54
													3501280092P01-030	119.739	25.6373	2.83668e+06	473763	0.728	29.39
													3501280092P01-031	119.739	25.6373	2.83668e+06	473765	0.515	32.9
													3501280092P01-032	119.739	25.6373	2.83668e+06	473767	0.327	37.51
													3501280092P01-033	119.739	25.6374	2.83669e+06	473770	0.059	42.78
													3501280092P01-034	119.739	25.6374	2.83669e+06	473772	-0.104	47.35
													3501280092P01-035	119.739	25.6374	2.8367e+06	473774	-0.22	51.44
													3501280092P01-036	119.739	25.6375	2.8367e+06	473776	-0.313	55.62
													3501280092P01-037	119.739	25.6375	2.8367e+06	473778	-0.487	59.36
													3501280092P01-038	119.739	25.6375	2.83671e+06	473780	-0.689	62.96
													3501280092P01-039	119.739	25.6376	2.83671e+06	473781	-0.853	65.54
													3501280092P01-040	119.739	25.6376	2.83671e+06	473782	-1.01	67.66
													3501280092P01-041	119.739	25.6376	2.83671e+06	473783	-1.198	69.6
													3501280092P01-042	119.739	25.6376	2.83671e+06	473784	-1.36	71.76
													3501280092P01-043	119.739	25.6376	2.83671e+06	473785	-1.5	73.63
													3501280092P01-044	119.739	25.6376	2.83672e+06	473786	-1.656	75.78
													3501280092P01-045	119.739	25.6377	2.83672e+06	473787	-1.76	78.24
													3501280092P01-046	119.739	25.6377	2.83672e+06	473789	-1.874	80.81
													3501280092P01-047	119.739	25.6377	2.83672e+06	473790	-2.021	83.76
													3501280092P01-048	119.739	25.6377	2.83673e+06	473792	-2.176	87.51
													3501280092P01-049	119.739	25.6378	2.83673e+06	473794	-2.302	90.84
8	过渡型	无	有	FJ128	3501280102	福州市大安底沙滩	福建省	福州市	平潭县	3501280102P01	15	167.21	3501280102P01-020	119.743	25.63	2.83587e+06	474236	2.972	30.22	2.80287	0.0314521	0.783955	0.351158	1.53557	-0.305215	0.879982	147	5.60574	4.55496	65	ENE	0.433182	1.149	5.043	4.58055	2.24785	12.1821	1.22381	1.11659	4.46916
													3501280102P01-021	119.743	25.63	2.83587e+06	474237	2.732	32.37
													3501280102P01-022	119.743	25.63	2.83587e+06	474237	2.482	34.38
													3501280102P01-023	119.743	25.63	2.83587e+06	474238	2.212	36.35
													3501280102P01-024	119.743	25.63	2.83587e+06	474238	1.963	38.37
													3501280102P01-025	119.743	25.6301	2.83588e+06	474239	1.705	40.45
													3501280102P01-026	119.743	25.6301	2.83588e+06	474239	1.508	42.34
													3501280102P01-027	119.743	25.6301	2.83588e+06	474240	1.37	43.59
													3501280102P01-028	119.744	25.6301	2.83588e+06	474240	1.181	45.37
													3501280102P01-029	119.744	25.6301	2.83588e+06	474240	1.01	46.66
													3501280102P01-030	119.744	25.6301	2.83588e+06	474241	0.876	48.26
													3501280102P01-031	119.744	25.6301	2.83589e+06	474241	0.729	50.39
													3501280102P01-032	119.744	25.6302	2.83589e+06	474242	0.628	53.92
													3501280102P01-033	119.744	25.6302	2.83589e+06	474244	0.515	59.24
													3501280102P01-034	119.744	25.6303	2.8359e+06	474246	0.34	66.44
													3501280102P01-035	119.744	25.6303	2.83591e+06	474247	0.241	73.18
													3501280102P01-036	119.744	25.6304	2.83592e+06	474250	0.114	81.44
													3501280102P01-037	119.744	25.6305	2.83592e+06	474251	-0.003	88.39
													3501280102P01-038	119.744	25.6306	2.83593e+06	474254	-0.139	97.22
													3501280102P01-039	119.744	25.6306	2.83594e+06	474256	-0.257	104.88
													3501280102P01-040	119.744	25.6307	2.83595e+06	474258	-0.401	112.57
													3501280102P01-041	119.744	25.6308	2.83595e+06	474260	-0.594	120.65
													3501280102P01-042	119.744	25.6308	2.83596e+06	474261	-0.711	126.26
													3501280102P01-043	119.744	25.6309	2.83596e+06	474263	-0.834	132.39
													3501280102P01-044	119.744	25.6309	2.83597e+06	474265	-0.968	137.95
													3501280102P01-045	119.744	25.631	2.83598e+06	474266	-1.096	144.09
													3501280102P01-046	119.744	25.631	2.83598e+06	474268	-1.207	149.22
													3501280102P01-047	119.744	25.6311	2.83599e+06	474269	-1.363	156.15
													3501280102P01-048	119.744	25.6312	2.836e+06	474272	-1.509	167.21
11	过渡型	无	有	FJ131	3501280132	福州市玉堂村东部海滩	福建省	福州市	平潭县	3501280132P01	327	163.27	3501280132P01-018	119.761	25.6555	2.83869e+06	475979	2.968	0	2.80287	0.0401939	2.01554	-1.01117	0.797001	-0.0105309	0.900593	147	5.60574	4.55496	65	ENE	0.433182	1.149	5.043	4.58055	0.991217	27.6262	1.22381	1.11659	4.46916
													3501280132P01-019	119.761	25.6555	2.83869e+06	475978	2.795	1.19
													3501280132P01-020	119.761	25.6555	2.83869e+06	475978	2.617	2.43
													3501280132P01-021	119.761	25.6555	2.83869e+06	475977	2.423	3.81
													3501280132P01-022	119.761	25.6555	2.83869e+06	475976	2.207	5.36
													3501280132P01-023	119.761	25.6555	2.83869e+06	475975	1.941	7.22
													3501280132P01-024	119.761	25.6555	2.83869e+06	475974	1.719	8.87
													3501280132P01-025	119.761	25.6555	2.8387e+06	475973	1.52	10.36
													3501280132P01-026	119.761	25.6556	2.8387e+06	475972	1.313	11.94
													3501280132P01-027	119.761	25.6556	2.8387e+06	475972	1.164	13.38
													3501280132P01-028	119.761	25.6556	2.8387e+06	475971	1.006	14.97
													3501280132P01-029	119.761	25.6556	2.8387e+06	475970	0.848	16.53
													3501280132P01-030	119.761	25.6556	2.8387e+06	475969	0.737	17.58
													3501280132P01-031	119.761	25.6556	2.8387e+06	475968	0.554	19.6
													3501280132P01-032	119.761	25.6557	2.83871e+06	475965	0.425	26.11
													3501280132P01-033	119.761	25.6557	2.83872e+06	475959	0.235	36.87
													3501280132P01-034	119.761	25.6558	2.83873e+06	475953	0.091	48.38
													3501280132P01-035	119.76	25.6559	2.83874e+06	475945	-0.178	62.86
													3501280132P01-036	119.76	25.6561	2.83876e+06	475935	-0.47	80.74
													3501280132P01-037	119.76	25.6563	2.83877e+06	475923	-0.741	103.48
													3501280132P01-038	119.76	25.6563	2.83878e+06	475920	-1.268	107.85
													3501280132P01-039	119.76	25.6563	2.83878e+06	475918	-0.441	112.69
													3501280132P01-040	119.76	25.6564	2.83879e+06	475914	-1.146	119.9
													3501280132P01-041	119.76	25.6564	2.83879e+06	475912	-1.843	122.68
													3501280132P01-042	119.76	25.6564	2.83879e+06	475911	-2.179	124.94
12	过渡型	无	有	FJ132	3501280142	福州市丰田下澳沙滩	福建省	福州市	平潭县	3501280142P01	348	146.53	3501280142P01-026	119.769	25.6593	2.83911e+06	476766	3.072	0	2.80287	0.0770202	0.444421	1.17	0.689	-0.106	0.893	147	5.60574	4.55496	65	ENE	0.433182	1.149	5.043	4.58055	7.01466	3.90376	1.22381	1.11659	4.46916
													3501280142P01-027	119.769	25.6593	2.83911e+06	476765	2.774	2.88
													3501280142P01-028	119.769	25.6593	2.83911e+06	476765	2.479	6.23
													3501280142P01-029	119.769	25.6593	2.83912e+06	476764	2.22	9.08
													3501280142P01-030	119.769	25.6594	2.83912e+06	476764	1.939	12.1
													3501280142P01-031	119.769	25.6594	2.83912e+06	476763	1.665	15.12
													3501280142P01-032	119.769	25.6594	2.83912e+06	476762	1.394	17.67
													3501280142P01-033	119.769	25.6594	2.83913e+06	476762	1.141	20.61
													3501280142P01-034	119.769	25.6595	2.83913e+06	476761	0.974	22.73
													3501280142P01-035	119.769	25.6595	2.83913e+06	476761	0.711	25.94
													3501280142P01-036	119.769	25.6595	2.83914e+06	476760	0.435	29.53
													3501280142P01-037	119.769	25.6596	2.83914e+06	476759	0.156	32.81
													3501280142P01-038	119.769	25.6596	2.83914e+06	476759	-0.073	35.87
													3501280142P01-039	119.769	25.6596	2.83914e+06	476758	-0.357	39.28
													3501280142P01-040	119.769	25.6596	2.83915e+06	476757	-0.611	42.41
													3501280142P01-041	119.769	25.6597	2.83915e+06	476756	-0.856	45.87
													3501280142P01-042	119.768	25.6597	2.83915e+06	476756	-1.126	49.67
													3501280142P01-043	119.768	25.6597	2.83916e+06	476755	-1.395	53.18
													3501280142P01-044	119.768	25.6598	2.83916e+06	476754	-1.69	57.21
													3501280142P01-045	119.768	25.6598	2.83917e+06	476753	-1.945	61.01
													3501280142P01-046	119.768	25.6598	2.83917e+06	476753	-2.112	63.44
													3501280142P01-047	119.768	25.6599	2.83917e+06	476752	-2.328	67.14
													3501280142P01-048	119.768	25.6599	2.83918e+06	476751	-2.538	70.48
													3501280142P01-049	119.768	25.6599	2.83918e+06	476751	-2.716	74.16
													3501280142P01-050	119.768	25.6599	2.83918e+06	476750	-2.868	76.75
13	过渡型	无	有	FJ133	3501280152	福州市甲澳沙滩	福建省	福州市	平潭县	3501280152P01	315	133.6	3501280152P43-014	119.776	25.6635	2.83957e+06	477513	2.888	0	2.80287	0.0505046	0.440079	1.18416	1.11277	0.230243	0.723256	147	5.60574	4.55496	65	ENE	0.433182	1.149	5.043	4.58055	4.14747	6.60246	1.22381	1.11659	4.46916
													3501280152P43-015	119.776	25.6635	2.83957e+06	477511	2.694	1.96
													3501280152P43-016	119.776	25.6635	2.83958e+06	477510	2.484	4.15
													3501280152P43-017	119.776	25.6635	2.83958e+06	477508	2.29	6.38
													3501280152P43-018	119.776	25.6635	2.83958e+06	477507	2.042	8.73
													3501280152P43-019	119.776	25.6636	2.83958e+06	477504	1.794	11.66
													3501280152P43-020	119.776	25.6636	2.83958e+06	477502	1.581	14.49
													3501280152P43-021	119.776	25.6636	2.83958e+06	477500	1.343	17.52
													3501280152P43-022	119.776	25.6636	2.83959e+06	477498	1.097	20.61
													3501280152P43-023	119.776	25.6636	2.83959e+06	477496	0.912	23.75
													3501280152P43-024	119.776	25.6637	2.83959e+06	477493	0.687	27.51
													3501280152P43-025	119.776	25.6637	2.8396e+06	477490	0.443	32.68
													3501280152P43-026	119.776	25.6637	2.8396e+06	477486	0.239	37.17
													3501280152P43-027	119.776	25.6637	2.8396e+06	477483	0.005	41.64
													3501280152P43-028	119.776	25.6638	2.8396e+06	477481	-0.177	45.49
													3501280152P43-029	119.776	25.6638	2.83961e+06	477477	-0.354	49.89
													3501280152P43-030	119.776	25.6638	2.83961e+06	477474	-0.593	55.23
													3501280152P43-031	119.776	25.6639	2.83961e+06	477471	-0.726	59.39
													3501280152P43-032	119.776	25.6639	2.83962e+06	477468	-0.898	63.1
													3501280152P43-033	119.776	25.6639	2.83962e+06	477465	-1.077	67.37
													3501280152P43-034	119.776	25.6639	2.83962e+06	477461	-1.296	72.48
													3501280152P43-035	119.775	25.664	2.83963e+06	477458	-1.491	77.09
													3501280152P43-036	119.775	25.664	2.83963e+06	477454	-1.685	82.48
													3501280152P43-037	119.775	25.664	2.83963e+06	477450	-1.933	88.57
													3501280152P43-038	119.775	25.6641	2.83964e+06	477446	-2.156	94.38
													3501280152P43-039	119.775	25.6641	2.83964e+06	477443	-2.32	98.62
													3501280152P43-040	119.775	25.6641	2.83965e+06	477439	-2.508	103.7
													3501280152P43-041	119.775	25.6642	2.83965e+06	477436	-2.711	108.98
16	过渡型	无	有	FJ136	3501280182	福州市长江澳沙滩	福建省	福州市	平潭县	3501280182P40	58	339.74	3501280182P40-054	119.775	25.6225	2.83503e+06	477442	2.834	0	2.79113	0.0176351	0.451316	1.14779	0.960301	-0.185229	0.657211	151	5.58227	4.52	50	NE	0.36589	1.641	4.689	3.92577	4.47122	6.79585	1.42196	1.31632	4.67968
													3501280182P40-055	119.775	25.6225	2.83503e+06	477447	2.722	5.21
													3501280182P40-056	119.775	25.6225	2.83503e+06	477451	2.628	10.11
													3501280182P40-057	119.776	25.6225	2.83504e+06	477455	2.536	14.97
													3501280182P40-058	119.776	25.6226	2.83504e+06	477459	2.427	20.27
													3501280182P40-059	119.776	25.6226	2.83504e+06	477464	2.289	25.18
													3501280182P40-060	119.776	25.6226	2.83504e+06	477468	2.175	29.96
													3501280182P40-061	119.776	25.6226	2.83505e+06	477472	2.057	34.84
													3501280182P40-062	119.776	25.6227	2.83505e+06	477476	1.928	39.89
													3501280182P40-063	119.776	25.6227	2.83505e+06	477480	1.896	45.02
													3501280182P40-064	119.776	25.6227	2.83505e+06	477485	1.775	50.07
													3501280182P40-065	119.776	25.6227	2.83506e+06	477489	1.679	55.36
													3501280182P40-066	119.776	25.6228	2.83506e+06	477494	1.584	60.86
													3501280182P40-067	119.776	25.6228	2.83506e+06	477498	1.494	66.35
													3501280182P40-068	119.776	25.6228	2.83507e+06	477503	1.416	71.76
													3501280182P40-069	119.776	25.6228	2.83507e+06	477507	1.341	76.91
													3501280182P40-070	119.776	25.6229	2.83507e+06	477513	1.239	83.46
													3501280182P40-071	119.776	25.6229	2.83508e+06	477518	1.054	89.21
													3501280182P40-072	119.776	25.6229	2.83508e+06	477523	1.028	94.84
													3501280182P40-073	119.776	25.6229	2.83508e+06	477528	0.936	100.6
													3501280182P40-074	119.776	25.623	2.83508e+06	477532	0.841	106.24
													3501280182P40-075	119.776	25.623	2.83509e+06	477537	0.734	111.86
													3501280182P40-076	119.776	25.623	2.83509e+06	477541	0.662	117.01
													3501280182P40-077	119.776	25.623	2.83509e+06	477546	0.568	122.27
													3501280182P40-078	119.776	25.6231	2.8351e+06	477551	0.465	127.77
													3501280182P40-079	119.777	25.6231	2.8351e+06	477555	0.342	133.23
													3501280182P40-080	119.777	25.6231	2.8351e+06	477560	0.257	138.93
													3501280182P40-081	119.777	25.6232	2.8351e+06	477565	0.157	144.51
													3501280182P40-082	119.777	25.6232	2.83511e+06	477569	0.059	150.07
													3501280182P40-083	119.777	25.6232	2.83511e+06	477574	-0.03	155.75
													3501280182P40-084	119.777	25.6232	2.83511e+06	477579	-0.108	161.07
													3501280182P40-085	119.777	25.6233	2.83512e+06	477583	-0.212	166.57
													3501280182P40-086	119.777	25.6233	2.83512e+06	477588	-0.289	171.78
													3501280182P40-087	119.777	25.6233	2.83512e+06	477593	-0.383	177.27
													3501280182P40-088	119.777	25.6233	2.83513e+06	477597	-0.49	182.73
													3501280182P40-089	119.777	25.6234	2.83513e+06	477601	-0.555	187.7
													3501280182P40-090	119.777	25.6234	2.83513e+06	477606	-0.643	193.24
													3501280182P40-091	119.777	25.6234	2.83513e+06	477610	-0.726	198.36
													3501280182P40-092	119.777	25.6234	2.83514e+06	477615	-0.829	203.89
													3501280182P40-093	119.777	25.6235	2.83514e+06	477619	-0.933	208.98
													3501280182P40-094	119.777	25.6235	2.83514e+06	477624	-1.015	214.48
													3501280182P40-095	119.777	25.6235	2.83514e+06	477629	-1.099	219.89
													3501280182P40-096	119.777	25.6235	2.83515e+06	477633	-1.204	224.99
													3501280182P40-097	119.777	25.6236	2.83515e+06	477637	-1.283	230.16
													3501280182P40-098	119.777	25.6236	2.83515e+06	477642	-1.368	235.32
													3501280182P40-099	119.777	25.6236	2.83515e+06	477645	-1.435	239.03
													3501280182P40-100	119.777	25.6236	2.83516e+06	477648	-1.506	242.03
													3501280182P40-101	119.777	25.6236	2.83516e+06	477651	-1.534	246.42
													3501280182P40-102	119.778	25.6237	2.83516e+06	477655	-1.605	250.8
													3501280182P40-103	119.778	25.6237	2.83516e+06	477659	-1.694	255.62
18	过渡型	无	有	FJ138	3501280202	福州市渔屿澳沙滩	福建省	福州市	平潭县	3501280202P01	162	78.04	3501280202P01-016	119.832	25.5953	2.83201e+06	483142	2.811	0	2.77495	0.0740706	0.940578	0.08838	1.23506	-0.023977	1.04054	152	5.54991	4.48337	50	NE	0.406814	1.916	4.992	3.47035	2.28948	14.4963	1.59924	1.50243	4.81859
													3501280202P01-017	119.832	25.5953	2.83201e+06	483143	2.565	2.09
													3501280202P01-018	119.832	25.5953	2.83201e+06	483143	2.272	3.97
													3501280202P01-019	119.832	25.5953	2.83201e+06	483144	2.088	5.48
													3501280202P01-020	119.832	25.5953	2.83201e+06	483144	1.865	7.46
													3501280202P01-021	119.832	25.5952	2.832e+06	483145	1.65	9.49
													3501280202P01-022	119.832	25.5952	2.832e+06	483146	1.407	12.26
													3501280202P01-023	119.832	25.5952	2.832e+06	483147	1.227	15.58
													3501280202P01-024	119.832	25.5952	2.832e+06	483148	0.974	18.48
													3501280202P01-025	119.832	25.5951	2.83199e+06	483149	0.766	21.46
													3501280202P01-026	119.832	25.5951	2.83199e+06	483150	0.531	24.49
													3501280202P01-027	119.832	25.5951	2.83199e+06	483150	0.275	27.39
													3501280202P01-028	119.832	25.5951	2.83199e+06	483151	0.06	30.08
													3501280202P01-029	119.832	25.595	2.83198e+06	483152	-0.204	33.06
													3501280202P01-030	119.832	25.595	2.83198e+06	483153	-0.359	35.68
													3501280202P01-031	119.832	25.595	2.83198e+06	483154	-0.488	38.31
													3501280202P01-032	119.832	25.595	2.83197e+06	483154	-0.576	41.29
													3501280202P01-033	119.832	25.5949	2.83197e+06	483155	-0.583	44.59
19	过渡型	无	有	FJ139	3501280212	福州市大澳村沙滩	福建省	福州市	平潭县	3501280212P37	18	175.35	3501280212P37-026	119.848	25.5659	2.82875e+06	484684	2.871	0	2.77495	0.0310566	0.365261	1.453	0.922	-0.306	0.861	152	5.54991	4.48337	50	NE	0.406814	1.916	4.992	3.47035	6.61838	5.01465	1.59924	1.50243	4.81859
													3501280212P37-027	119.848	25.5659	2.82875e+06	484685	2.738	4.43
													3501280212P37-028	119.848	25.5659	2.82876e+06	484687	2.614	9.56
													3501280212P37-029	119.848	25.566	2.82876e+06	484689	2.454	15.15
													3501280212P37-030	119.848	25.566	2.82877e+06	484690	2.334	20.46
													3501280212P37-031	119.848	25.5661	2.82877e+06	484692	2.233	25.81
													3501280212P37-032	119.848	25.5661	2.82878e+06	484694	2.107	31.04
													3501280212P37-033	119.848	25.5662	2.82878e+06	484696	1.935	37.89
													3501280212P37-034	119.848	25.5663	2.82879e+06	484698	1.717	45.46
													3501280212P37-035	119.848	25.5663	2.8288e+06	484700	1.561	52.09
													3501280212P37-036	119.848	25.5664	2.8288e+06	484703	1.369	59.61
													3501280212P37-037	119.848	25.5664	2.82881e+06	484705	1.174	67.1
													3501280212P37-038	119.848	25.5665	2.82882e+06	484707	0.925	74.5
													3501280212P37-039	119.848	25.5666	2.82882e+06	484709	0.772	81.22
													3501280212P37-040	119.848	25.5666	2.82883e+06	484712	0.505	89.94
													3501280212P37-041	119.848	25.5667	2.82884e+06	484715	0.235	97.59
													3501280212P37-042	119.848	25.5668	2.82885e+06	484717	-0.041	104.88
													3501280212P37-043	119.848	25.5668	2.82885e+06	484719	-0.339	111.64
													3501280212P37-044	119.848	25.5669	2.82886e+06	484721	-0.502	117.69
													3501280212P37-045	119.848	25.5669	2.82886e+06	484723	-0.653	123.53
													3501280212P37-046	119.848	25.567	2.82887e+06	484724	-0.876	128.28
													3501280212P37-047	119.848	25.567	2.82887e+06	484726	-1.277	133.71
20	过渡型	无	有	FJ140	3501280222	福州市南澳底澳沙滩	福建省	福州市	平潭县	3501280222P34	91	100.24	3501280222P34-028	119.86	25.5465	2.8266e+06	485977	2.901	0	2.7735	0.054696	0.595493	0.747843	1.68645	-0.527651	0.842854	153	5.54701	4.48526	63	ENE	0.454488	1.621	5.316	3.82042	3.26555	9.21359	1.45194	1.3305	4.82572
													3501280222P34-029	119.86	25.5465	2.8266e+06	485979	2.723	2.6
													3501280222P34-030	119.861	25.5465	2.8266e+06	485982	2.54	5.43
													3501280222P34-031	119.861	25.5465	2.8266e+06	485985	2.337	8.08
													3501280222P34-032	119.861	25.5465	2.8266e+06	485988	2.133	10.85
													3501280222P34-033	119.861	25.5465	2.8266e+06	485990	1.943	13.54
													3501280222P34-034	119.861	25.5465	2.8266e+06	485993	1.726	16.6
													3501280222P34-035	119.861	25.5465	2.8266e+06	485997	1.507	19.69
													3501280222P34-036	119.861	25.5465	2.8266e+06	485999	1.313	22.55
													3501280222P34-037	119.861	25.5465	2.8266e+06	486002	1.145	24.98
													3501280222P34-038	119.861	25.5465	2.8266e+06	486004	0.991	27.43
													3501280222P34-039	119.861	25.5465	2.8266e+06	486007	0.817	30.38
													3501280222P34-040	119.861	25.5465	2.8266e+06	486010	0.687	32.98
													3501280222P34-041	119.861	25.5465	2.8266e+06	486013	0.548	36.08
													3501280222P34-042	119.861	25.5465	2.8266e+06	486016	0.419	38.95
													3501280222P34-043	119.861	25.5465	2.8266e+06	486019	0.261	42.22
													3501280222P34-044	119.861	25.5465	2.8266e+06	486022	0.147	44.8
													3501280222P34-045	119.861	25.5465	2.8266e+06	486025	-0.035	48.04
													3501280222P34-046	119.861	25.5465	2.8266e+06	486028	-0.157	51.39
													3501280222P34-047	119.861	25.5464	2.8266e+06	486033	-0.324	56.07
													3501280222P34-048	119.861	25.5464	2.8266e+06	486038	-0.48	61.16
21	过渡型	无	有	FJ141	3501280232	福州市湾底澳沙滩	福建省	福州市	平潭县	3501280232P32	174	119.08	3501280232P32-030	119.84	25.5523	2.82724e+06	483939	2.785	0	2.7735	0.0796059	0.178624	2.485	0.447	-0.28	1.173	153	5.54701	4.48526	63	ENE	0.454488	1.621	5.316	3.82042	6.35057	4.73776	1.45194	1.3305	4.82572
													3501280232P32-031	119.84	25.5523	2.82724e+06	483939	2.576	1.66
													3501280232P32-032	119.84	25.5523	2.82725e+06	483939	2.357	3.52
													3501280232P32-033	119.84	25.5523	2.82725e+06	483939	2.14	5.36
													3501280232P32-034	119.84	25.5523	2.82725e+06	483939	1.929	7.37
													3501280232P32-035	119.84	25.5524	2.82725e+06	483938	1.716	9.58
													3501280232P32-036	119.84	25.5524	2.82726e+06	483938	1.524	11.71
													3501280232P32-037	119.84	25.5524	2.82726e+06	483938	1.37	13.96
													3501280232P32-038	119.84	25.5524	2.82726e+06	483937	1.213	16
													3501280232P32-039	119.84	25.5525	2.82726e+06	483937	1.07	17.96
													3501280232P32-040	119.84	25.5525	2.82727e+06	483937	0.924	20.18
													3501280232P32-041	119.84	25.5525	2.82727e+06	483936	0.727	22.97
													3501280232P32-042	119.84	25.5525	2.82727e+06	483936	0.6	25.17
													3501280232P32-043	119.84	25.5526	2.82728e+06	483936	0.443	27.53
													3501280232P32-044	119.84	25.5526	2.82728e+06	483935	0.273	30.59
29	过渡型	无	有	FJ147	3501280302	福州市磹报底澳沙滩	福建省	福州市	平潭县	3501280302P01	108	139.56	3501280302P01-015	119.853	25.4685	2.81796e+06	485191	2.902	0	2.7735	0.03035	1.54823	-0.630623	1.05782	0.295216	1.45876	153	5.54701	4.48526	63	ENE	0.454488	1.621	5.316	3.82042	1.34274	22.4076	1.45194	1.3305	4.82572
													3501280302P01-016	119.853	25.4685	2.81796e+06	485193	2.617	2.25
													3501280302P01-017	119.853	25.4685	2.81796e+06	485194	2.45	3.96
													3501280302P01-018	119.853	25.4685	2.81796e+06	485196	2.307	5.85
													3501280302P01-019	119.853	25.4685	2.81796e+06	485199	2.111	8.58
													3501280302P01-020	119.853	25.4685	2.81796e+06	485203	1.955	12.59
													3501280302P01-021	119.853	25.4685	2.81796e+06	485209	1.706	19.64
													3501280302P01-022	119.853	25.4685	2.81796e+06	485216	1.499	26.86
													3501280302P01-023	119.853	25.4684	2.81795e+06	485225	1.201	36.42
													3501280302P01-024	119.853	25.4684	2.81795e+06	485236	0.884	47.15
													3501280302P01-025	119.853	25.4684	2.81795e+06	485245	0.658	57.32
													3501280302P01-026	119.853	25.4683	2.81794e+06	485256	0.419	68.07
													3501280302P01-027	119.853	25.4683	2.81794e+06	485266	0.163	79.17
													3501280302P01-028	119.854	25.4683	2.81794e+06	485276	-0.111	89.57
													3501280302P01-029	119.854	25.4683	2.81793e+06	485287	-0.396	100.65
													3501280302P01-030	119.854	25.4682	2.81793e+06	485296	-0.654	110.25
													3501280302P01-031	119.854	25.4682	2.81793e+06	485300	-0.808	115.1
32	过渡型	无	有	FJ150	3501280332	福州市玉道村沙滩	福建省	福州市	平潭县	3501280332P20	184	111.9	3501280332P20-014	119.827	25.4722	2.81838e+06	482615	2.917	0	2.76791	0.0603747	0.460094	1.12	1.1	0.02	1.04	154	5.53581	4.48362	69	ENE	0.564181	1.312	4.69	4.15947	20.1058	1.42044	1.33089	1.21434	4.66016
													3501280332P20-015	119.827	25.4722	2.81837e+06	482615	2.692	1.94
													3501280332P20-016	119.827	25.4722	2.81837e+06	482615	2.402	4.3
													3501280332P20-017	119.827	25.4722	2.81837e+06	482615	2.161	6.48
													3501280332P20-018	119.827	25.4721	2.81837e+06	482615	1.935	8.91
													3501280332P20-019	119.827	25.4721	2.81836e+06	482615	1.756	11.07
													3501280332P20-020	119.827	25.4721	2.81836e+06	482614	1.587	13.55
													3501280332P20-021	119.827	25.4721	2.81836e+06	482614	1.405	16.22
													3501280332P20-022	119.827	25.472	2.81836e+06	482614	1.208	19.1
													3501280332P20-023	119.827	25.472	2.81835e+06	482614	1.067	21.23
													3501280332P20-024	119.827	25.472	2.81835e+06	482614	0.886	24.32
													3501280332P20-025	119.827	25.472	2.81835e+06	482613	0.695	28.71
													3501280332P20-026	119.827	25.4719	2.81834e+06	482613	0.47	32.69
													3501280332P20-027	119.827	25.4719	2.81834e+06	482613	0.32	36.62
													3501280332P20-028	119.827	25.4719	2.81834e+06	482612	0.185	39.59
													3501280332P20-029	119.827	25.4718	2.81833e+06	482612	0.036	43.14
													3501280332P20-030	119.827	25.4718	2.81833e+06	482612	-0.121	47.07
													3501280332P20-031	119.827	25.4718	2.81832e+06	482612	-0.273	51.05
36	过渡型	无	有	FJ155	3501280372	福州市北澳沙滩	福建省	福州市	平潭县	3501280372P15	133	144.2	3501280372P15-019	119.771	25.4454	2.81541e+06	476978	2.915	0	2.76775	0.0372189	0.454186	1.13864	0.918355	0.375087	0.838358	155	5.5355	4.48692	69	ENE	0.516718	1.358	4.653	3.88312	4.36153	6.84524	1.42553	1.30725	4.77472
													3501280372P15-020	119.771	25.4453	2.81541e+06	476982	2.706	5.38
													3501280372P15-021	119.771	25.4453	2.8154e+06	476986	2.437	11.32
													3501280372P15-022	119.771	25.4453	2.8154e+06	476990	2.229	16.31
													3501280372P15-023	119.771	25.4452	2.8154e+06	476994	2.015	22.23
													3501280372P15-024	119.771	25.4452	2.81539e+06	476998	1.792	27.79
													3501280372P15-025	119.771	25.4452	2.81539e+06	477003	1.544	33.99
													3501280372P15-026	119.771	25.4451	2.81538e+06	477007	1.31	39.58
													3501280372P15-027	119.771	25.4451	2.81538e+06	477012	1.062	45.94
													3501280372P15-028	119.771	25.4451	2.81538e+06	477014	0.943	49.01
													3501280372P15-029	119.772	25.445	2.81537e+06	477018	0.774	53.86
													3501280372P15-030	119.772	25.445	2.81537e+06	477021	0.625	58.73
													3501280372P15-031	119.772	25.445	2.81537e+06	477025	0.418	64.03
													3501280372P15-032	119.772	25.4449	2.81536e+06	477030	0.244	70.33
													3501280372P15-033	119.772	25.4449	2.81536e+06	477034	0.1	75.9
													3501280372P15-034	119.772	25.4449	2.81535e+06	477038	-0.086	82.31
													3501280372P15-035	119.772	25.4448	2.81535e+06	477042	-0.282	87.48
													3501280372P15-036	119.772	25.4448	2.81535e+06	477046	-0.451	92.58
													3501280372P15-037	119.772	25.4448	2.81534e+06	477049	-0.608	96.74
													3501280372P15-038	119.772	25.4448	2.81534e+06	477051	-0.712	99.35
													3501280372P15-039	119.772	25.4447	2.81534e+06	477055	-0.985	104.55
37	过渡型	无	有	FJ156	3501280382	福州市崎沙沙滩	福建省	福州市	平潭县	3501280382P14	145	104.23	3501280382P14-017	119.766	25.443	2.81515e+06	476413	2.778	0	2.76775	0.0493264	0.459234	1.1227	0.826723	0.202915	0.695847	155	5.5355	4.48692	69	ENE	0.516718	1.358	4.653	3.88312	4.30687	6.93212	1.42553	1.30725	4.77472
													3501280382P14-018	119.766	25.443	2.81515e+06	476415	2.533	2.53
													3501280382P14-019	119.766	25.443	2.81514e+06	476416	2.283	5.56
													3501280382P14-020	119.766	25.4429	2.81514e+06	476418	2.082	8.83
													3501280382P14-021	119.766	25.4429	2.81514e+06	476420	1.876	12.1
													3501280382P14-022	119.766	25.4429	2.81514e+06	476422	1.712	15.06
													3501280382P14-023	119.766	25.4429	2.81514e+06	476422	1.647	15.65
													3501280382P14-024	119.766	25.4429	2.81513e+06	476424	1.51	18.94
													3501280382P14-025	119.766	25.4428	2.81513e+06	476426	1.353	21.9
													3501280382P14-026	119.766	25.4428	2.81513e+06	476429	1.117	27.29
													3501280382P14-027	119.766	25.4428	2.81512e+06	476431	0.941	30.96
													3501280382P14-028	119.766	25.4427	2.81512e+06	476433	0.814	35.1
													3501280382P14-029	119.766	25.4427	2.81512e+06	476435	0.665	38.83
													3501280382P14-030	119.766	25.4427	2.81511e+06	476437	0.506	42.75
													3501280382P14-031	119.766	25.4426	2.81511e+06	476441	0.242	48.4
													3501280382P14-032	119.766	25.4426	2.81511e+06	476443	0.052	52.92
													3501280382P14-033	119.766	25.4426	2.8151e+06	476445	-0.104	56.25
													3501280382P14-034	119.766	25.4426	2.8151e+06	476447	-0.281	59.95
													3501280382P14-035	119.766	25.4425	2.81509e+06	476451	-0.616	66.37
45	过渡型	无	有	FJ162	3501280472	福州市大福村沙滩	福建省	福州市	平潭县	3501280472P10	205	142.61	3501280472P10-024	119.76	25.4013	2.81053e+06	475860	2.915	0	2.76661	0.0434099	0.204209	2.29188	0.79903	-0.452626	1.58643	156	5.53322	4.49213	64	ENE	0.510811	1.663	5.024	3.75744	13.0094	2.44058	1.4726	1.38134	4.63807
													3501280472P10-025	119.76	25.4013	2.81053e+06	475859	2.761	1.72
													3501280472P10-026	119.76	25.4013	2.81052e+06	475858	2.578	3.32
													3501280472P10-027	119.76	25.4012	2.81052e+06	475858	2.391	5.17
													3501280472P10-028	119.76	25.4012	2.81052e+06	475857	2.24	6.91
													3501280472P10-029	119.76	25.4012	2.81052e+06	475856	2.069	8.9
													3501280472P10-030	119.76	25.4012	2.81052e+06	475855	1.878	11.3
													3501280472P10-031	119.76	25.4012	2.81052e+06	475855	1.87	11.34
													3501280472P10-032	119.76	25.4012	2.81052e+06	475854	1.729	13.26
													3501280472P10-033	119.76	25.4012	2.81051e+06	475853	1.599	15.33
													3501280472P10-034	119.76	25.4011	2.81051e+06	475852	1.46	17.79
													3501280472P10-035	119.76	25.4011	2.81051e+06	475851	1.337	20.33
													3501280472P10-036	119.76	25.4011	2.81051e+06	475850	1.2	23.48
													3501280472P10-037	119.76	25.4011	2.8105e+06	475849	1.073	26.18
													3501280472P10-038	119.76	25.401	2.8105e+06	475847	0.985	29.1
													3501280472P10-039	119.76	25.401	2.8105e+06	475845	0.88	34
													3501280472P10-040	119.76	25.401	2.81049e+06	475843	0.75	39.76
													3501280472P10-041	119.76	25.4009	2.81049e+06	475841	0.616	44.48
													3501280472P10-042	119.76	25.4009	2.81048e+06	475839	0.494	49.5
													3501280472P10-043	119.76	25.4009	2.81048e+06	475838	0.473	50.24
													3501280472P10-044	119.76	25.4008	2.81048e+06	475836	0.354	54.59
													3501280472P10-045	119.76	25.4008	2.81047e+06	475834	0.248	59.61
49	过渡型	无	有	FJ164	3501280512	福州市象鼻湾沙滩	福建省	福州市	平潭县	3501280512P02	170	174.129	3501280512P02-043	119.694	25.434	2.81417e+06	469207	2.948	0	2.79183	0.109386	0.219341	2.18875	0.512793	-0.225663	1.79294	150	5.58365	4.53694	68	ENE	0.1946	0.715	3.028	9.36958	7.04236	2.70479	0.595935	0.54286	3.12858
													3501280512P02-044	119.694	25.434	2.81416e+06	469207	2.713	2.38
													3501280512P02-045	119.694	25.434	2.81416e+06	469208	2.506	4.91
													3501280512P02-046	119.694	25.4339	2.81416e+06	469208	2.257	7.59
													3501280512P02-047	119.694	25.4339	2.81416e+06	469209	1.956	10.42
													3501280512P02-048	119.694	25.4339	2.81415e+06	469209	1.665	12.92
													3501280512P02-049	119.694	25.4339	2.81415e+06	469210	1.347	15.63
													3501280512P02-050	119.694	25.4338	2.81415e+06	469210	1.043	18.21
													3501280512P02-051	119.694	25.4338	2.81415e+06	469210	0.774	20.45
													3501280512P02-052	119.694	25.4338	2.81414e+06	469211	0.587	22.04
													3501280512P02-053	119.694	25.4338	2.81414e+06	469211	0.333	24.35
													3501280512P02-054	119.694	25.4338	2.81414e+06	469212	0.044	26.9
													3501280512P02-055	119.694	25.4337	2.81414e+06	469212	-0.256	29.29
													3501280512P02-056	119.694	25.4337	2.81414e+06	469212	-0.457	31.36
50	过渡型	无	有	FJ166	3501280532	福州市北后澳沙滩	福建省	福州市	平潭县	3501280532P01	346	105.63	3501280532P01-010	119.693	25.5027	2.82178e+06	469121	2.859	0	2.80287	0.0426244	1.53688	-0.62	1.481	0.159	0.612	149	5.60573	4.56017	21	NNE	0.398481	0.583	2.569	11.8553	2.23377	8.35854	0.472847	0.451843	2.53251
													3501280532P01-011	119.693	25.5027	2.82178e+06	469121	2.747	1.41
													3501280532P01-012	119.693	25.5027	2.82178e+06	469121	2.576	2.83
													3501280532P01-013	119.693	25.5027	2.82178e+06	469120	2.437	4.35
													3501280532P01-014	119.693	25.5027	2.82178e+06	469120	2.287	5.79
													3501280532P01-015	119.693	25.5027	2.82178e+06	469120	2.149	7.21
													3501280532P01-016	119.693	25.5028	2.82178e+06	469119	2.013	8.74
													3501280532P01-017	119.693	25.5028	2.82179e+06	469119	1.884	10.11
													3501280532P01-018	119.693	25.5028	2.82179e+06	469119	1.737	11.81
													3501280532P01-019	119.693	25.5028	2.82179e+06	469118	1.586	13.69
													3501280532P01-020	119.693	25.5028	2.82179e+06	469118	1.425	15.98
													3501280532P01-021	119.693	25.5028	2.82179e+06	469117	1.289	18.32
													3501280532P01-022	119.693	25.5029	2.8218e+06	469116	1.049	22.68
													3501280532P01-023	119.693	25.5029	2.8218e+06	469115	0.738	29.14
													3501280532P01-024	119.693	25.503	2.82181e+06	469113	0.455	37.82
													3501280532P01-025	119.693	25.5031	2.82182e+06	469110	0.058	48.7
													3501280532P01-026	119.693	25.5032	2.82184e+06	469107	-0.464	63.14
													3501280532P01-027	119.693	25.5033	2.82185e+06	469104	-0.802	75.54
													3501280532P01-028	119.693	25.5034	2.82186e+06	469102	-0.915	84.41
													3501280532P01-029	119.693	25.5035	2.82186e+06	469101	-0.995	89.2
51	过渡型	无	有	FJ167	3501280542	福州市澳仔沙滩	福建省	福州市	平潭县	3501280542P01	322	78.26	3501280542P01-014	119.715	25.5083	2.82239e+06	471364	2.857	0	2.80287	0.0322167	1.35055	-0.433542	1.37668	-0.0295563	0.728435	149	5.60573	4.56017	21	NNE	0.398481	0.583	2.569	11.8553	0.933792	19.9949	0.472847	0.451843	2.53251
													3501280542P01-015	119.715	25.5083	2.82239e+06	471363	2.644	1.68
													3501280542P01-016	119.715	25.5083	2.8224e+06	471361	2.393	4.3
													3501280542P01-017	119.715	25.5083	2.8224e+06	471361	2.468	4.84
													3501280542P01-018	119.715	25.5083	2.8224e+06	471360	2.391	6.67
													3501280542P01-019	119.715	25.5084	2.8224e+06	471359	2.207	8.56
													3501280542P01-020	119.715	25.5084	2.8224e+06	471357	2.063	10.76
													3501280542P01-021	119.715	25.5084	2.82241e+06	471354	1.937	15.7
													3501280542P01-022	119.715	25.5084	2.82241e+06	471354	2.082	16.04
													3501280542P01-023	119.715	25.5084	2.82241e+06	471353	2.03	17.39
													3501280542P01-024	119.715	25.5084	2.82241e+06	471352	1.943	18.72
													3501280542P01-025	119.715	25.5084	2.82241e+06	471351	1.778	20.31
													3501280542P01-026	119.715	25.5085	2.82241e+06	471347	1.503	27.18
													3501280542P01-027	119.715	25.5085	2.82241e+06	471347	1.574	27.48
													3501280542P01-028	119.715	25.5086	2.82242e+06	471341	1.25	36.86
													3501280542P01-029	119.715	25.5086	2.82243e+06	471335	1.045	46.89
													3501280542P01-030	119.715	25.5087	2.82244e+06	471328	0.836	57.8
61	过渡型	无	有	FJ186	3501280712	福州市塘屿中楼后澳沙滩	福建省	福州市	平潭县	3501280712P01	99	98.97	3501280712P01-017	119.693	25.3331	2.80298e+06	469122	2.943	0	2.76661	0.0322089	0.356013	1.49	1.031	-0.376	1.206	156	5.53322	4.49213	64	ENE	0.510811	1.663	5.024	3.75744	11.8508	2.67918	1.4726	1.38134	4.63807
													3501280712P01-018	119.693	25.333	2.80298e+06	469124	2.709	2.67
													3501280712P01-019	119.693	25.333	2.80298e+06	469127	2.492	5.52
													3501280712P01-020	119.693	25.333	2.80298e+06	469130	2.277	8.36
													3501280712P01-021	119.693	25.333	2.80298e+06	469134	2.03	12.63
													3501280712P01-022	119.693	25.333	2.80298e+06	469139	1.862	17.63
													3501280712P01-023	119.694	25.333	2.80298e+06	469146	1.687	24.5
													3501280712P01-024	119.694	25.333	2.80298e+06	469155	1.421	33.64
													3501280712P01-025	119.694	25.333	2.80298e+06	469163	1.24	41.51
													3501280712P01-026	119.694	25.333	2.80298e+06	469172	1.018	50.32
													3501280712P01-027	119.694	25.333	2.80297e+06	469176	0.948	55.17
													3501280712P01-028	119.694	25.333	2.80297e+06	469185	0.747	63.96
													3501280712P01-029	119.694	25.333	2.80297e+06	469189	0.618	67.59
62	过渡型	无	有	FJ187	3501280722	福州市塘屿后沃沙滩	福建省	福州市	平潭县	3501280722P01	46	148.84	3501280722P01-027	119.697	25.323	2.80186e+06	469492	2.848	0	2.76661	0.026869	0.772635	0.372142	1.219	0.121117	0.803263	156	5.53322	4.49213	64	ENE	0.510811	1.663	5.024	3.75744	2.64373	12.0097	1.4726	1.38134	4.63807
													3501280722P01-028	119.697	25.323	2.80187e+06	469493	2.633	2.03
													3501280722P01-029	119.697	25.323	2.80187e+06	469495	2.435	4.17
													3501280722P01-030	119.697	25.323	2.80187e+06	469497	2.253	6.87
													3501280722P01-031	119.697	25.323	2.80187e+06	469500	2.094	11.12
													3501280722P01-032	119.697	25.3231	2.80188e+06	469503	1.985	16.06
													3501280722P01-033	119.697	25.3231	2.80188e+06	469511	1.67	26.41
													3501280722P01-034	119.697	25.3232	2.80189e+06	469519	1.369	38.56
													3501280722P01-035	119.697	25.3233	2.8019e+06	469530	1.114	52.49
													3501280722P01-036	119.698	25.3234	2.80191e+06	469544	0.635	72.95
													3501280722P01-037	119.698	25.3235	2.80192e+06	469554	0.318	86.09
													3501280722P01-038	119.698	25.3235	2.80193e+06	469557	0.217	89.86
													3501280722P01-039	119.698	25.3236	2.80193e+06	469561	0.092	96.6
63	过渡型	无	有	FJ190	3501280752	福州市塘屿石古兜沙滩	福建省	福州市	平潭县	3501280752P01	119	79.48	3501280752P01-023	119.694	25.3161	2.8011e+06	469214	2.905	36.33	2.77681	0.0751614	0.664156	0.590405	1.20329	0.122665	0.840742	158	5.55361	4.51268	68	ENE	0.509756	1.427	4.763	3.94928	2.89255	10.3199	1.40623	1.29385	4.71088
													3501280752P01-024	119.694	25.3161	2.8011e+06	469215	2.748	37.65
													3501280752P01-025	119.694	25.3161	2.8011e+06	469216	2.573	38.99
													3501280752P01-026	119.694	25.3161	2.8011e+06	469217	2.406	40.27
													3501280752P01-027	119.694	25.3161	2.8011e+06	469219	2.246	41.47
													3501280752P01-028	119.694	25.3161	2.8011e+06	469220	2.084	42.71
													3501280752P01-029	119.694	25.3161	2.8011e+06	469221	1.909	44.11
													3501280752P01-030	119.694	25.3161	2.8011e+06	469222	1.743	45.34
													3501280752P01-031	119.694	25.316	2.8011e+06	469223	1.515	47.06
													3501280752P01-032	119.694	25.316	2.8011e+06	469225	1.29	48.83
													3501280752P01-033	119.694	25.316	2.8011e+06	469226	1.114	50.47
													3501280752P01-034	119.694	25.316	2.8011e+06	469228	0.892	52.87
													3501280752P01-035	119.694	25.316	2.80109e+06	469231	0.736	56.12
													3501280752P01-036	119.694	25.316	2.80109e+06	469235	0.54	60.83
													3501280752P01-037	119.695	25.316	2.80109e+06	469241	0.192	67.09
													3501280752P01-038	119.695	25.3159	2.80108e+06	469252	-0.396	79.48
65	过渡型	无	有	FJ193	3501280782	福州市塘屿南楼澳沙滩	福建省	福州市	平潭县	3501280782P01	329	113.22	3501280782P01-016	119.69	25.3153	2.80102e+06	468751	2.889	0	2.78894	0.0325911	0.905807	0.142725	1.01023	0.0529148	1.04977	157	5.57787	4.53446	42	NE	0.334353	0.803	3.07	7.87641	1.54223	13.9932	0.708174	0.65766	3.2815
													3501280782P01-017	119.69	25.3153	2.80102e+06	468750	2.776	1.69
													3501280782P01-018	119.69	25.3153	2.80102e+06	468750	2.696	3.28
													3501280782P01-019	119.69	25.3154	2.80102e+06	468749	2.524	5.14
													3501280782P01-020	119.69	25.3154	2.80103e+06	468748	2.394	6.68
													3501280782P01-021	119.69	25.3154	2.80103e+06	468747	2.223	8.67
													3501280782P01-022	119.69	25.3154	2.80103e+06	468746	2.091	10.46
													3501280782P01-023	119.69	25.3154	2.80103e+06	468745	1.944	12.24
													3501280782P01-024	119.69	25.3154	2.80103e+06	468744	1.792	14.58
													3501280782P01-025	119.69	25.3155	2.80103e+06	468743	1.618	16.78
													3501280782P01-026	119.69	25.3155	2.80104e+06	468742	1.517	18.52
													3501280782P01-027	119.69	25.3155	2.80104e+06	468741	1.39	20.5
													3501280782P01-028	119.69	25.3155	2.80104e+06	468740	1.229	22.81
													3501280782P01-029	119.69	25.3155	2.80104e+06	468739	1.142	24.57
													3501280782P01-030	119.69	25.3155	2.80104e+06	468738	1.015	26.71
													3501280782P01-031	119.69	25.3155	2.80105e+06	468737	0.893	28.72
													3501280782P01-032	119.69	25.3156	2.80105e+06	468736	0.75	30.57
													3501280782P01-033	119.689	25.3156	2.80105e+06	468735	0.696	32.24
													3501280782P01-034	119.689	25.3156	2.80105e+06	468734	0.589	33.93
													3501280782P01-035	119.689	25.3156	2.80105e+06	468733	0.484	35.37
													3501280782P01-036	119.689	25.3156	2.80105e+06	468732	0.339	37.66
													3501280782P01-037	119.689	25.3157	2.80106e+06	468729	0.165	42.52
													3501280782P01-038	119.689	25.3157	2.80106e+06	468725	0.121	50.08
													3501280782P01-039	119.689	25.3158	2.80107e+06	468719	0.112	62.16
													3501280782P01-040	119.689	25.3159	2.80108e+06	468716	0.124	68.31
													3501280782P01-041	119.689	25.3159	2.80109e+06	468712	0.165	75.59
													3501280782P01-042	119.689	25.316	2.8011e+06	468705	-0.078	89.26
84	过渡型	无	有	FJ205	3501810171	福清市沙玉村沙滩	福建省	福州市	福清市	3501810171P01	92	145.45	3501810171P01-018	119.65	25.3993	2.81034e+06	464778	2.795	65.91	2.79183	0.0316733	0.760329	0.395304	1.19657	0.0747905	0.990192	150	5.58365	4.53694	68	ENE	0.1946	0.715	3.028	9.36958	1.61124	11.822	0.595935	0.54286	3.12858
													3501810171P01-019	119.65	25.3993	2.81034e+06	464780	2.572	67.94
													3501810171P01-020	119.65	25.3993	2.81034e+06	464782	2.349	69.58
													3501810171P01-021	119.65	25.3993	2.81034e+06	464783	2.16	70.77
													3501810171P01-022	119.65	25.3993	2.81034e+06	464786	2.173	73.55
													3501810171P01-023	119.65	25.3993	2.81034e+06	464792	2.098	79.74
													3501810171P01-024	119.65	25.3993	2.81034e+06	464802	1.825	89.51
													3501810171P01-025	119.65	25.3993	2.81033e+06	464810	1.467	97.47
													3501810171P01-026	119.65	25.3993	2.81033e+06	464816	1.086	103.95
													3501810171P01-027	119.651	25.3993	2.81033e+06	464836	0.707	123.74
													3501810171P01-028	119.651	25.3993	2.81033e+06	464852	0.43	139.14
													3501810171P01-029	119.651	25.3993	2.81033e+06	464858	0.117	145.45
86	过渡型	无	有	FJ208	3501810201	福清市小峰东村沙滩	福建省	福州市	福清市	3501810201P01	180	118.32	3501810201P01-017	119.622	25.3437	2.80418e+06	461941	2.861	0	2.79157	0.095514	0.672616	0.572144	1.25728	-0.139286	1.33268	159	5.58313	4.54655	67	ENE	0.408712	1.066	3.55	6.0323	2.39541	10.454	0.925539	0.865943	3.69601
													3501810201P01-018	119.622	25.3437	2.80418e+06	461941	2.656	1.43
													3501810201P01-019	119.622	25.3437	2.80418e+06	461941	2.423	3.1
													3501810201P01-020	119.622	25.3436	2.80418e+06	461941	2.224	4.48
													3501810201P01-021	119.622	25.3436	2.80417e+06	461941	1.996	6
													3501810201P01-022	119.622	25.3436	2.80417e+06	461941	1.797	7.49
													3501810201P01-023	119.622	25.3436	2.80417e+06	461941	1.572	8.86
													3501810201P01-024	119.622	25.3436	2.80417e+06	461941	1.37	10.45
													3501810201P01-025	119.622	25.3436	2.80417e+06	461941	1.155	11.98
													3501810201P01-026	119.622	25.3436	2.80417e+06	461941	0.916	13.56
													3501810201P01-027	119.622	25.3435	2.80416e+06	461941	0.666	15.38
													3501810201P01-028	119.622	25.3435	2.80416e+06	461941	0.433	17.07
													3501810201P01-029	119.622	25.3435	2.80416e+06	461941	0.191	18.86
													3501810201P01-030	119.622	25.3435	2.80416e+06	461941	-0.062	20.74
													3501810201P01-031	119.622	25.3435	2.80416e+06	461941	-0.295	22.49
													3501810201P01-032	119.622	25.3435	2.80416e+06	461941	-0.517	24.41
													3501810201P01-033	119.622	25.3434	2.80415e+06	461941	-0.754	26.26
													3501810201P01-034	119.622	25.3434	2.80415e+06	461941	-0.913	28.93
													3501810201P01-035	119.622	25.3434	2.80415e+06	461941	-1.147	31.15
													3501810201P01-036	119.622	25.3434	2.80415e+06	461941	-1.408	33.65
													3501810201P01-037	119.622	25.3434	2.80414e+06	461941	-1.737	36.48
													3501810201P01-038	119.622	25.3433	2.80414e+06	461941	-1.907	38.41
													3501810201P01-039	119.622	25.3433	2.80414e+06	461941	-2.261	43.03
													3501810201P01-040	119.622	25.3432	2.80413e+06	461941	-2.317	49.98
													3501810201P01-041	119.622	25.3432	2.80412e+06	461941	-2.454	54.93
87	过渡型	无	有	FJ209	3501810211	福清市东岭村沙滩	福建省	福州市	福清市	3501810211P01	205	101.14	3501810211P01-005	119.616	25.3454	2.80438e+06	461364	2.884	0	2.79157	0.0343122	0.368686	1.43953	0.756461	-0.13981	1.20851	159	5.58313	4.54655	67	ENE	0.408712	1.066	3.55	6.0323	4.67543	5.35599	0.925539	0.865943	3.69601
													3501810211P01-006	119.616	25.3453	2.80437e+06	461359	2.456	12.35
													3501810211P01-007	119.616	25.3452	2.80435e+06	461353	2.177	26.87
													3501810211P01-008	119.616	25.3451	2.80434e+06	461347	1.522	41.33
													3501810211P01-009	119.616	25.345	2.80433e+06	461342	1.033	51.39
													3501810211P01-010	119.616	25.345	2.80433e+06	461340	0.743	56.58
													3501810211P01-011	119.616	25.3449	2.80432e+06	461337	0.483	64.66
													3501810211P01-012	119.616	25.3449	2.80431e+06	461334	0.346	70.72
													3501810211P01-013	119.616	25.3449	2.80431e+06	461334	0.312	71.77
													3501810211P01-014	119.616	25.3449	2.80431e+06	461333	0.426	72.51
													3501810211P01-015	119.616	25.3448	2.80431e+06	461332	0.426	75.45
													3501810211P01-016	119.616	25.3448	2.80431e+06	461331	0.429	78.38
													3501810211P01-017	119.616	25.3448	2.8043e+06	461329	0.264	83.79
													3501810211P01-018	119.616	25.3447	2.8043e+06	461327	0.041	87.57
													3501810211P01-019	119.616	25.3447	2.80429e+06	461325	-0.357	91.25
													3501810211P01-020	119.616	25.3447	2.80429e+06	461323	-0.43	96.46
92	过渡型	无	有	FJ216	3501810281	福清市长沙村沙滩	福建省	福州市	福清市	3501810281P01	177	47.25	3501810281P01-014	119.51	25.3809	2.80834e+06	450684	2.838	0	2.80464	0.0614884	0.806397	0.310438	0.527228	-0.177424	1.39648	160	5.60927	4.57409	46	NE	0.272334	0.762	2.792	8.88639	1.67622	12.5223	0.63122	0.594985	3.00723
													3501810281P01-015	119.51	25.3809	2.80834e+06	450684	2.643	1.62
													3501810281P01-016	119.51	25.3809	2.80834e+06	450684	2.502	3.02
													3501810281P01-017	119.51	25.3809	2.80834e+06	450684	2.343	4.7
													3501810281P01-018	119.51	25.3809	2.80834e+06	450684	2.176	6.44
													3501810281P01-019	119.51	25.3809	2.80834e+06	450684	2.024	8.19
													3501810281P01-020	119.51	25.3809	2.80833e+06	450684	1.882	9.83
													3501810281P01-021	119.51	25.3808	2.80833e+06	450685	1.751	11.23
													3501810281P01-022	119.51	25.3808	2.80833e+06	450685	1.707	11.79
													3501810281P01-023	119.51	25.3808	2.80833e+06	450685	1.552	13.15
													3501810281P01-024	119.51	25.3808	2.80833e+06	450685	1.504	14.64
													3501810281P01-025	119.51	25.3808	2.80833e+06	450685	1.466	18.91
													3501810281P01-026	119.51	25.3807	2.80832e+06	450685	1.321	23.12
96	过渡型	无	有	FJ218-1	3501810321	福清市牛头尾沙滩	福建省	福州市	福清市	3501810321P01	231	95.08	3501810321P01-010	119.485	25.3672	2.80683e+06	448157	2.828	0	2.80464	0.0662437	1.3719	-0.456176	1.28533	-0.454176	0.520991	160	5.60927	4.57409	46	NE	0.272334	0.762	2.792	8.88639	1.03593	20.2622	0.63122	0.594985	3.00723
													3501810321P01-011	119.485	25.3672	2.80683e+06	448155	2.57	3.12
													3501810321P01-012	119.485	25.3672	2.80683e+06	448153	2.358	5.3
													3501810321P01-013	119.485	25.3672	2.80683e+06	448149	2.037	9.61
													3501810321P01-014	119.485	25.3672	2.80683e+06	448148	1.853	11.92
													3501810321P01-015	119.485	25.367	2.80681e+06	448132	0.201	32.71
													3501810321P01-016	119.485	25.367	2.80681e+06	448131	0.149	32.82
													3501810321P01-017	119.485	25.367	2.80681e+06	448130	0.031	34.11
													3501810321P01-018	119.485	25.367	2.80681e+06	448129	-0.084	35.6
													3501810321P01-019	119.485	25.367	2.80681e+06	448129	-0.16	36.31
													3501810321P01-020	119.485	25.367	2.80681e+06	448127	-0.312	37.81
													3501810321P01-021	119.485	25.367	2.80681e+06	448126	-0.511	39.59
													3501810321P01-022	119.484	25.3669	2.8068e+06	448113	-1.386	55.91
													3501810321P01-023	119.484	25.3669	2.80679e+06	448109	-1.529	61.75
													3501810321P01-024	119.484	25.3668	2.80679e+06	448105	-1.659	66.96
97	过渡型	无	有	FJ218-3	3501810331	福清市琯下村沙滩	福建省	福州市	福清市	3501810331P01	263	39.28	3501810331P01-013	119.513	25.3955	2.80995e+06	450955	3.003	0	2.80881	0.121133	1.0305	-0.0433384	1.28921	-0.0274705	1.45371	161	5.61762	4.58522	22	NNE	0.220546	0.553	2.377	12.4017	1.08913	15.7669	0.452972	0.419593	2.63783
													3501810331P01-014	119.513	25.3955	2.80995e+06	450954	2.809	1.67
													3501810331P01-015	119.513	25.3955	2.80995e+06	450952	2.646	3.09
													3501810331P01-016	119.513	25.3955	2.80995e+06	450951	2.454	4.57
													3501810331P01-017	119.513	25.3955	2.80995e+06	450949	2.29	5.97
													3501810331P01-018	119.513	25.3955	2.80995e+06	450948	2.081	7.55
													3501810331P01-019	119.513	25.3955	2.80995e+06	450946	1.859	9.2
													3501810331P01-020	119.512	25.3955	2.80995e+06	450945	1.687	10.72
													3501810331P01-021	119.512	25.3955	2.80995e+06	450943	1.499	12.1
													3501810331P01-022	119.512	25.3955	2.80995e+06	450942	1.314	13.37
													3501810331P01-023	119.512	25.3955	2.80995e+06	450940	1.012	15.49
													3501810331P01-024	119.512	25.3955	2.80995e+06	450939	0.992	16.67
98	过渡型	无	有	FJ218-4	3501810341	福清市六一沙滩	福建省	福州市	福清市	3501810341P01	239	27.96	3501810341P01-011	119.512	25.3985	2.81029e+06	450875	2.956	0	2.80881	0.0799076	0.501838	0.994706	1.09757	-0.212236	1.82169	161	5.61762	4.58522	22	NNE	0.220546	0.553	2.377	12.4017	2.24248	7.65768	0.452972	0.419593	2.63783
													3501810341P01-012	119.512	25.3985	2.81029e+06	450874	2.784	1.54
													3501810341P01-013	119.512	25.3985	2.81029e+06	450872	2.62	3.43
													3501810341P01-014	119.512	25.3985	2.81028e+06	450871	2.473	5.09
													3501810341P01-015	119.512	25.3985	2.81028e+06	450869	2.274	6.78
													3501810341P01-016	119.512	25.3985	2.81028e+06	450868	2.162	8.04
													3501810341P01-017	119.512	25.3984	2.81028e+06	450866	2.092	10.2
100	过渡型	无	无	FJ220	3501810371	福清市龙洋村沙滩	福建省	福州市	福清市	3501810371P01	236	30.54	3501810371P01-009	119.508	25.4065	2.81117e+06	450456	2.892	0	2.80881	0.0734694	1.72183	-0.783942	0.777008	-0.139822	0.90355	161	5.61762	4.58522	22	NNE	0.220546	0.553	2.377	12.4017	0.70321	24.4197	0.452972	0.419593	2.63783
													3501810371P01-010	119.508	25.4065	2.81117e+06	450454	2.756	1.54
													3501810371P01-011	119.508	25.4065	2.81117e+06	450453	2.599	3.09
													3501810371P01-012	119.508	25.4064	2.81117e+06	450452	2.475	4.58
													3501810371P01-013	119.508	25.4064	2.81117e+06	450451	2.365	5.89
													3501810371P01-014	119.508	25.4064	2.81117e+06	450450	2.238	7.36
													3501810371P01-015	119.508	25.4064	2.81117e+06	450448	2.104	8.85
													3501810371P01-016	119.508	25.4064	2.81117e+06	450447	1.974	10.33
													3501810371P01-017	119.507	25.4064	2.81117e+06	450446	1.858	11.89
													3501810371P01-018	119.507	25.4064	2.81116e+06	450445	1.731	13.21
													3501810371P01-019	119.507	25.4064	2.81116e+06	450444	1.611	14.3
													3501810371P01-020	119.507	25.4064	2.81116e+06	450443	1.511	14.89
													3501810371P01-021	119.507	25.4064	2.81116e+06	450443	1.49	15.49
													3501810371P01-022	119.507	25.4064	2.81116e+06	450439	1.424	19.67
101	过渡型	无	有	FJ220-1	3501810381	福清市莆头村北沙滩	福建省	福州市	福清市	3501810381P01	119	25.56	3501810381P01-011	119.346	25.5247	2.82434e+06	434261	2.876	0	2.80881	0.0691667	0.836899	0.256875	1.39215	-0.0574796	1.00201	161	5.61762	4.58522	22	NNE	0.220546	0.553	2.377	12.4017	1.32301	12.9796	0.452972	0.419593	2.63783
													3501810381P01-012	119.346	25.5247	2.82434e+06	434263	2.703	1.53
													3501810381P01-013	119.346	25.5247	2.82434e+06	434263	2.571	2.55
													3501810381P01-014	119.346	25.5247	2.82434e+06	434265	2.518	4.81
													3501810381P01-015	119.346	25.5247	2.82434e+06	434267	2.371	6.33
102	过渡型	无	有	FJ220-2	3501810391	福清市莆头村南沙滩	福建省	福州市	福清市	3501810391P01	93	21.49	3501810391P01-010	119.343	25.5162	2.8234e+06	433964	2.87	0	2.80881	0.0293651	0.910154	0.135817	1.48611	-0.172774	1.11524	161	5.61762	4.58522	22	NNE	0.220546	0.553	2.377	12.4017	1.22168	14.0562	0.452972	0.419593	2.63783
													3501810391P01-011	119.343	25.5162	2.8234e+06	433966	2.718	1.27
													3501810391P01-012	119.343	25.5162	2.8234e+06	433967	2.645	3.15
													3501810391P01-013	119.343	25.5162	2.82339e+06	433970	2.565	6.22
													3501810391P01-014	119.343	25.5162	2.82339e+06	433972	2.533	7.57
103	过渡型	无	无	FJ221	3501810401	福清市塘边村沙滩	福建省	福州市	福清市	3501810401P01	72	34.305	3501810401P01-012	119.328	25.4787	2.81925e+06	432405	2.958	-0.005	2.80881	0.0977513	0.7986	0.324455	1.60954	-0.421354	0.693234	161	5.61762	4.58522	22	NNE	0.220546	0.553	2.377	12.4017	1.38433	12.4047	0.452972	0.419593	2.63783
													3501810401P01-013	119.328	25.4787	2.81925e+06	432407	2.692	2.733
													3501810401P01-014	119.328	25.4787	2.81925e+06	432409	2.466	5.047
													3501810401P01-015	119.328	25.4787	2.81925e+06	432411	2.319	6.684
													3501810401P01-016	119.328	25.4787	2.81926e+06	432413	2.093	8.746
													3501810401P01-017	119.328	25.4787	2.81926e+06	432415	1.843	11.033
													3501810401P01-018	119.328	25.4787	2.81926e+06	432417	1.698	12.608
													3501810401P01-019	119.328	25.4787	2.81926e+06	432417	1.64	13.495
104	过渡型	无	有	FJ221-1	3501810411	福清市东肖村沙滩	福建省	福州市	福清市	3501810411P03	65	45.01	3501810411P03-012	119.33	25.4594	2.81711e+06	432572	3.032	0	2.80881	0.0696915	1	-0.00186149	1.33855	-0.450182	0.66767	161	5.61762	4.58522	22	NNE	0.220546	0.553	2.377	12.4017	1.11811	15.3581	0.452972	0.419593	2.63783
													3501810411P03-013	119.33	25.4594	2.81711e+06	432574	2.765	2.33
													3501810411P03-014	119.33	25.4594	2.81711e+06	432576	2.523	4.69
													3501810411P03-015	119.33	25.4594	2.81711e+06	432576	2.521	4.78
													3501810411P03-016	119.33	25.4594	2.81711e+06	432578	2.324	6.9
													3501810411P03-017	119.33	25.4594	2.81711e+06	432580	2.102	8.99
													3501810411P03-018	119.33	25.4594	2.81712e+06	432582	1.893	11.19
													3501810411P03-019	119.33	25.4594	2.81712e+06	432584	1.692	13.25
													3501810411P03-020	119.33	25.4594	2.81712e+06	432586	1.458	15.35
													3501810411P03-021	119.33	25.4594	2.81712e+06	432586	1.435	15.57
													3501810411P03-022	119.33	25.4594	2.81712e+06	432588	1.236	17.66
													3501810411P03-023	119.33	25.4594	2.81712e+06	432590	1.044	20.28
													3501810411P03-024	119.33	25.4595	2.81712e+06	432593	0.924	23.25
													3501810411P03-025	119.33	25.4595	2.81712e+06	432596	0.86	26.3
													3501810411P03-026	119.33	25.4595	2.81712e+06	432599	0.822	30.21
111	过渡型	无	有	FJ224	3503040041	莆田市东皋村妈祖文化园沙滩	福建省	莆田市	荔城区	3503040041P01	65	44.84	3503040041P01-011	119.221	25.3372	2.80364e+06	421585	2.946	21.49	2.80558	0.0652812	1.63548	-0.70971	1.43007	0.172529	0.684807	162	5.61117	4.58124	44	NE	0.317793	0.611	2.585	12.9369	0.686085	23.4305	0.433734	0.392971	2.69813
													3503040041P01-012	119.221	25.3373	2.80364e+06	421588	2.646	24.39
													3503040041P01-013	119.221	25.3373	2.80364e+06	421590	2.327	27.39
													3503040041P01-014	119.221	25.3373	2.80364e+06	421593	2.017	30.32
													3503040041P01-015	119.221	25.3373	2.80365e+06	421596	1.78	33.88
													3503040041P01-016	119.221	25.3373	2.80365e+06	421602	1.511	39.62
													3503040041P01-017	119.221	25.3373	2.80365e+06	421606	1.311	44.84
115	过渡型	无	无	FJ227-1	3503050031	莆田市坊边村沙滩	福建省	莆田市	秀屿区	3503050031P01	23	36.99	3503050031P01-006	119.27	25.3145	2.80109e+06	426459	3.04	0	2.80558	0.0879786	0.488055	1.03489	1.64569	-0.608939	0.651511	162	5.61117	4.58124	44	NE	0.317793	0.611	2.585	12.9369	2.16534	7.42393	0.433734	0.392971	2.69813
													3503050031P01-007	119.27	25.3145	2.8011e+06	426460	2.53	3.1
													3503050031P01-008	119.27	25.3145	2.8011e+06	426461	2.208	5.32
													3503050031P01-009	119.27	25.3145	2.8011e+06	426461	2.024	7.05
													3503050031P01-010	119.27	25.3146	2.8011e+06	426462	1.839	8.61
													3503050031P01-011	119.27	25.3146	2.8011e+06	426463	1.601	10.68
													3503050031P01-012	119.27	25.3146	2.8011e+06	426464	1.407	12.27
													3503050031P01-013	119.27	25.3146	2.80111e+06	426464	1.19	14.14
													3503050031P01-014	119.27	25.3146	2.80111e+06	426465	0.982	15.93
													3503050031P01-015	119.27	25.3146	2.80111e+06	426466	0.913	17.96
													3503050031P01-016	119.27	25.3147	2.80111e+06	426467	0.725	21.95
													3503050031P01-017	119.27	25.3147	2.80112e+06	426469	0.554	25.56
117	过渡型	无	有	FJ229	3503050051	莆田市汀港村沙滩	福建省	莆田市	秀屿区	3503050051P01	35	213.94	3503050051P01-021	119.306	25.3	2.79946e+06	430138	2.908	0	2.80558	0.0249608	0.623928	0.680549	0.402221	-0.189431	1.60558	162	5.61117	4.58124	44	NE	0.317793	0.611	2.585	12.9369	1.66149	9.67528	0.433734	0.392971	2.69813
													3503050051P01-022	119.306	25.3	2.79946e+06	430139	2.604	2.53
													3503050051P01-023	119.306	25.3	2.79947e+06	430141	2.325	4.84
													3503050051P01-024	119.306	25.3	2.79947e+06	430142	2.108	6.97
													3503050051P01-025	119.306	25.3	2.79947e+06	430143	1.935	8.95
													3503050051P01-026	119.306	25.3	2.79947e+06	430145	1.695	11.62
													3503050051P01-027	119.306	25.3001	2.79947e+06	430146	1.485	14.47
													3503050051P01-028	119.306	25.3001	2.79948e+06	430149	1.291	18.4
													3503050051P01-029	119.306	25.3001	2.79948e+06	430151	1.107	23.04
													3503050051P01-030	119.306	25.3002	2.79948e+06	430154	1.02	28.1
													3503050051P01-031	119.306	25.3002	2.79949e+06	430158	0.89	34.3
													3503050051P01-032	119.307	25.3003	2.7995e+06	430163	0.699	41.93
													3503050051P01-033	119.307	25.3003	2.7995e+06	430168	0.478	50.67
													3503050051P01-034	119.307	25.3004	2.79951e+06	430173	0.168	59.86
													3503050051P01-035	119.307	25.3005	2.79952e+06	430178	-0.013	68.73
													3503050051P01-036	119.307	25.3005	2.79953e+06	430184	-0.166	78.7
													3503050051P01-037	119.307	25.3006	2.79953e+06	430188	-0.278	85.68
													3503050051P01-038	119.307	25.3006	2.79954e+06	430194	-0.397	94.44
													3503050051P01-039	119.307	25.3007	2.79954e+06	430198	-0.55	102.1
													3503050051P01-040	119.307	25.3008	2.79955e+06	430203	-0.724	109.95
													3503050051P01-041	119.307	25.3008	2.79956e+06	430207	-0.901	117.79
													3503050051P01-042	119.307	25.3009	2.79957e+06	430213	-1.092	127.48
													3503050051P01-043	119.307	25.301	2.79957e+06	430219	-1.236	137.47
													3503050051P01-044	119.307	25.301	2.79958e+06	430225	-1.363	147.75
													3503050051P01-045	119.307	25.3011	2.79959e+06	430231	-1.453	157.36
													3503050051P01-046	119.307	25.3012	2.7996e+06	430237	-1.538	168.47
132	过渡型	无	有	FJ240	3503050202	莆田市南日岛庙尾村沙滩	福建省	莆田市	秀屿区	3503050202P01	86	54.41	3503050202P01-008	119.545	25.1704	2.78501e+06	454161	2.957	0	2.78026	0.110245	2.17196	-1.119	1.047	0.138	0.61	167	5.56051	4.52816	66	ENE	0.491931	1.615	4.817	3.87838	5.13574	6.13326	1.43372	1.34852	4.55166
													3503050202P01-009	119.545	25.1704	2.78501e+06	454164	2.578	3.42
													3503050202P01-010	119.545	25.1704	2.78501e+06	454167	2.265	6.58
													3503050202P01-011	119.545	25.1704	2.78501e+06	454170	1.933	9.73
													3503050202P01-012	119.545	25.1704	2.78501e+06	454172	1.643	11.74
													3503050202P01-013	119.545	25.1705	2.78501e+06	454180	0.72	19.48
													3503050202P01-014	119.546	25.1705	2.78501e+06	454182	0.539	21.29
													3503050202P01-015	119.546	25.1705	2.78501e+06	454185	0.224	24.36
													3503050202P01-016	119.546	25.1705	2.78501e+06	454187	0.044	26.19
													3503050202P01-017	119.546	25.1705	2.78501e+06	454189	-0.123	27.92
133	过渡型	无	有	FJ241	3503050212	莆田市南日岛东户村沙滩	福建省	莆田市	秀屿区	3503050212P01	219	135.53	3503050212P01-021	119.518	25.1711	2.78509e+06	451403	2.964	0	2.79939	0.0604062	0.574611	0.799342	1.50374	-0.0470886	0.941219	166	5.59877	4.56325	66	ENE	0.263052	0.899	3.395	6.22769	2.69779	8.87137	0.899012	0.828297	3.75636
													3503050212P01-022	119.518	25.1711	2.78509e+06	451402	2.804	1.28
													3503050212P01-023	119.518	25.1711	2.78509e+06	451401	2.588	2.94
													3503050212P01-024	119.518	25.1711	2.78509e+06	451400	2.41	4.42
													3503050212P01-025	119.518	25.171	2.78509e+06	451399	2.21	6.41
													3503050212P01-026	119.518	25.171	2.78509e+06	451398	2.07	8.88
													3503050212P01-027	119.518	25.171	2.78508e+06	451396	1.911	11.99
													3503050212P01-028	119.518	25.171	2.78508e+06	451394	1.802	13.75
													3503050212P01-029	119.518	25.171	2.78508e+06	451393	1.644	16.62
													3503050212P01-030	119.518	25.171	2.78508e+06	451391	1.473	19.98
													3503050212P01-031	119.518	25.1709	2.78507e+06	451388	1.216	24.49
													3503050212P01-032	119.518	25.1709	2.78507e+06	451385	0.989	28.66
													3503050212P01-033	119.518	25.1709	2.78507e+06	451383	0.796	32.52
													3503050212P01-034	119.518	25.1708	2.78507e+06	451381	0.637	35.9
													3503050212P01-035	119.518	25.1708	2.78506e+06	451378	0.42	39.93
													3503050212P01-036	119.518	25.1708	2.78506e+06	451376	0.276	43.13
141	过渡型	无	有	FJ251	3503050311	莆田市尖山脚村沙滩	福建省	莆田市	秀屿区	3503050311P01	154	126.05	3503050311P01-013	119.31	25.2418	2.79302e+06	430492	2.885	0	2.8068	0.0556451	0.351825	1.50707	0.828827	-0.0732624	0.798606	165	5.6136	4.57581	48	NE	0.326864	0.705	2.918	7.69681	4.24404	5.05821	0.729341	0.670577	3.39746
													3503050311P01-014	119.31	25.2418	2.79301e+06	430493	2.711	1.31
													3503050311P01-015	119.31	25.2418	2.79301e+06	430494	2.511	2.56
													3503050311P01-016	119.31	25.2418	2.79301e+06	430494	2.319	3.91
													3503050311P01-017	119.31	25.2417	2.79301e+06	430495	2.102	5.27
													3503050311P01-018	119.31	25.2417	2.79301e+06	430495	1.888	6.59
													3503050311P01-019	119.31	25.2417	2.79301e+06	430496	1.695	7.89
													3503050311P01-020	119.31	25.2417	2.79301e+06	430497	1.538	9.2
													3503050311P01-021	119.31	25.2417	2.79301e+06	430497	1.379	10.76
													3503050311P01-022	119.31	25.2417	2.793e+06	430498	1.193	12.64
													3503050311P01-023	119.31	25.2417	2.793e+06	430499	1.057	14.17
													3503050311P01-024	119.31	25.2416	2.793e+06	430500	0.928	16.56
													3503050311P01-025	119.31	25.2416	2.793e+06	430502	0.769	20
													3503050311P01-026	119.31	25.2416	2.793e+06	430503	0.602	22.89
													3503050311P01-027	119.31	25.2416	2.79299e+06	430505	0.31	28.46
													3503050311P01-028	119.31	25.2415	2.79299e+06	430507	0.104	32.8
													3503050311P01-029	119.31	25.2415	2.79298e+06	430510	-0.171	38.14
													3503050311P01-030	119.31	25.2414	2.79298e+06	430512	-0.388	43.24
													3503050311P01-031	119.31	25.2414	2.79297e+06	430514	-0.629	48.61
													3503050311P01-032	119.31	25.2414	2.79297e+06	430516	-0.764	52.69
													3503050311P01-033	119.31	25.2413	2.79297e+06	430518	-0.928	57.17
													3503050311P01-034	119.31	25.2413	2.79296e+06	430520	-1.091	61.62
													3503050311P01-035	119.31	25.2413	2.79296e+06	430522	-1.236	65.79
													3503050311P01-036	119.31	25.2412	2.79295e+06	430524	-1.39	69.93
													3503050311P01-037	119.31	25.2412	2.79295e+06	430526	-1.537	73.5
													3503050311P01-038	119.31	25.2412	2.79295e+06	430527	-1.604	75.89
													3503050311P01-039	119.31	25.2411	2.79294e+06	430529	-1.795	81.22
													3503050311P01-040	119.311	25.2411	2.79294e+06	430531	-1.917	84.48
142	过渡型	无	有	FJ252	3503050321	莆田市卓东村沙滩	福建省	莆田市	秀屿区	3503050321P01	108	231.66	3503050321P01-025	119.288	25.2251	2.79118e+06	428302	3.169	0.004	2.8068	0.0304796	0.408481	1.29166	1.00531	-0.129059	1.00872	165	5.6136	4.57581	48	NE	0.326864	0.705	2.918	7.69681	3.54606	6.05383	0.729341	0.670577	3.39746
													3503050321P01-026	119.289	25.2251	2.79118e+06	428305	2.809	2.614
													3503050321P01-027	119.289	25.2251	2.79118e+06	428308	2.333	5.884
													3503050321P01-028	119.289	25.2251	2.79118e+06	428311	1.954	8.874
													3503050321P01-029	119.289	25.2251	2.79118e+06	428313	1.631	11.764
													3503050321P01-030	119.289	25.2251	2.79118e+06	428317	1.237	15.354
													3503050321P01-031	119.289	25.2251	2.79118e+06	428319	1.148	17.904
													3503050321P01-032	119.289	25.2251	2.79118e+06	428326	1.07	25.004
													3503050321P01-033	119.289	25.2251	2.79117e+06	428332	0.936	31.194
													3503050321P01-034	119.289	25.225	2.79117e+06	428340	0.79	39.254
													3503050321P01-035	119.289	25.225	2.79117e+06	428347	0.607	47.524
													3503050321P01-036	119.289	25.225	2.79117e+06	428355	0.431	55.684
													3503050321P01-037	119.289	25.225	2.79116e+06	428363	0.269	64.164
													3503050321P01-038	119.289	25.225	2.79116e+06	428367	0.173	68.584
													3503050321P01-039	119.289	25.2249	2.79116e+06	428378	-0.08	79.554
													3503050321P01-040	119.289	25.2249	2.79116e+06	428387	-0.357	89.244
													3503050321P01-041	119.289	25.2249	2.79115e+06	428394	-0.605	97.004
													3503050321P01-042	119.289	25.2249	2.79115e+06	428403	-0.846	105.574
													3503050321P01-043	119.29	25.2248	2.79115e+06	428416	-1.215	119.824
													3503050321P01-044	119.29	25.2248	2.79114e+06	428427	-1.451	131.174
													3503050321P01-045	119.29	25.2247	2.79114e+06	428442	-1.765	147.264
													3503050321P01-046	119.29	25.2247	2.79113e+06	428461	-2.23	166.734
													3503050321P01-047	119.29	25.2247	2.79113e+06	428470	-2.496	176.434
													3503050321P01-048	119.29	25.2247	2.79113e+06	428472	-2.567	178.994
143	过渡型	无	有	FJ252-1	3503050331	莆田市虎江边村沙滩	福建省	莆田市	秀屿区	3503050331P01	73	126.88	3503050331P01-026	119.292	25.2129	2.78983e+06	428614	2.891	0	2.8068	0.0265823	0.370319	1.43316	1.52863	-0.57125	0.783311	165	5.6136	4.57581	48	NE	0.326864	0.705	2.918	7.69681	3.98666	5.38477	0.729341	0.670577	3.39746
													3503050331P01-027	119.292	25.2129	2.78983e+06	428618	2.719	4.08
													3503050331P01-028	119.292	25.2129	2.78983e+06	428622	2.499	8.77
													3503050331P01-029	119.292	25.213	2.78983e+06	428627	2.329	13.8
													3503050331P01-030	119.292	25.213	2.78983e+06	428634	2.136	21.02
													3503050331P01-031	119.292	25.213	2.78984e+06	428645	1.845	32.18
													3503050331P01-032	119.292	25.213	2.78984e+06	428653	1.615	41.15
													3503050331P01-033	119.292	25.2131	2.78984e+06	428662	1.372	50.5
													3503050331P01-034	119.292	25.2131	2.78985e+06	428674	1.09	63.36
													3503050331P01-035	119.292	25.2131	2.78985e+06	428685	0.815	74.31
													3503050331P01-036	119.292	25.2131	2.78985e+06	428693	0.64	82.29
146	过渡型	无	有	FJ254	3503050351	莆田市后石井村沙滩	福建省	莆田市	秀屿区	3503050351P02	99	117.22	3503050351P02-015	119.299	25.1923	2.78754e+06	429385	2.919	0	2.8068	0.0373169	0.854149	0.227441	1.25929	0.26787	1.13847	165	5.6136	4.57581	48	NE	0.326864	0.705	2.918	7.69681	1.62196	13.2354	0.729341	0.670577	3.39746
													3503050351P02-016	119.299	25.1923	2.78754e+06	429387	2.659	2.01
													3503050351P02-017	119.299	25.1923	2.78754e+06	429389	2.401	3.99
													3503050351P02-018	119.299	25.1923	2.78754e+06	429391	2.171	6.17
													3503050351P02-019	119.299	25.1923	2.78754e+06	429393	1.951	8.29
													3503050351P02-020	119.299	25.1923	2.78754e+06	429394	1.958	8.48
													3503050351P02-021	119.3	25.1923	2.78754e+06	429395	1.708	10.29
													3503050351P02-022	119.3	25.1923	2.78754e+06	429398	1.607	12.57
													3503050351P02-023	119.3	25.1923	2.78754e+06	429403	1.345	18.54
													3503050351P02-024	119.3	25.1923	2.78754e+06	429411	1.057	26.4
													3503050351P02-025	119.3	25.1923	2.78754e+06	429422	0.696	37.02
													3503050351P02-026	119.3	25.1923	2.78754e+06	429433	0.381	48.9
													3503050351P02-027	119.3	25.1923	2.78753e+06	429448	0.008	64.05
													3503050351P02-028	119.3	25.1922	2.78753e+06	429458	-0.231	73.95
													3503050351P02-029	119.3	25.1922	2.78753e+06	429470	-0.516	85.56
													3503050351P02-030	119.3	25.1922	2.78753e+06	429477	-0.754	93.47
155	过渡型	无	无	FJ262	3503050431	莆田市后坑村沙滩	福建省	莆田市	秀屿区	3503050431P02	99	30.99	3503050431P02-006	119.105	25.2036	2.78891e+06	409788	3.011	0	2.79718	0.0909786	2.58761	-1.37162	0.693185	0.0900002	1.04002	168	5.59436	4.5562	48	E	0.419049	0.746	3.609	7.70836	0.57508	33.293	0.725753	0.63095	3.7906
													3503050431P02-007	119.105	25.2036	2.78891e+06	409791	2.705	3.14
													3503050431P02-008	119.105	25.2036	2.78891e+06	409793	2.476	5.86
													3503050431P02-009	119.105	25.2036	2.78891e+06	409794	2.388	6.76
													3503050431P02-010	119.105	25.2036	2.7889e+06	409796	2.203	8.79
													3503050431P02-011	119.105	25.2036	2.7889e+06	409799	1.946	11.63
													3503050431P02-012	119.105	25.2036	2.7889e+06	409802	1.748	14.81
													3503050431P02-013	119.105	25.2036	2.7889e+06	409805	1.511	17.6
													3503050431P02-014	119.105	25.2036	2.7889e+06	409807	1.325	19.86
													3503050431P02-015	119.105	25.2036	2.7889e+06	409807	1.278	20.12
													3503050431P02-016	119.105	25.2036	2.7889e+06	409809	0.976	22.17
													3503050431P02-017	119.105	25.2036	2.7889e+06	409810	0.92	22.76
163	过渡型	无	有	FJ270	3503050512	莆田市湄洲岛北埭澳沙滩	福建省	莆田市	秀屿区	3503050512P01	97	147.32	3503050512P01-017	119.133	25.0623	2.77324e+06	412470	2.915	0	2.78534	0.0321208	1.65587	-0.72759	1.76549	0.663479	0.979574	169	5.57069	4.53443	71	ENE	0.421791	1.025	3.866	5.78186	0.999061	23.6663	0.963476	0.867171	4.07492
													3503050512P01-018	119.133	25.0623	2.77324e+06	412473	2.498	3.7
													3503050512P01-019	119.133	25.0623	2.77324e+06	412478	2.07	8.23
													3503050512P01-020	119.133	25.0623	2.77324e+06	412482	1.813	12.19
													3503050512P01-021	119.133	25.0623	2.77324e+06	412485	1.617	15.85
													3503050512P01-022	119.133	25.0623	2.77324e+06	412497	1.153	27.87
													3503050512P01-023	119.133	25.0623	2.77323e+06	412511	0.777	41.3
													3503050512P01-024	119.133	25.0623	2.77323e+06	412523	0.469	53.58
													3503050512P01-025	119.133	25.0623	2.77323e+06	412534	0.213	64.67
													3503050512P01-026	119.133	25.0622	2.77323e+06	412545	-0.035	75.72
													3503050512P01-027	119.133	25.0622	2.77323e+06	412557	-0.3	87.74
													3503050512P01-028	119.133	25.0622	2.77323e+06	412562	-0.426	92.75
													3503050512P01-029	119.134	25.0622	2.77323e+06	412569	-0.626	100.36
													3503050512P01-030	119.134	25.0622	2.77323e+06	412571	-0.681	102.67
167	过渡型	无	有	FJ274	3503050552	莆田市湄洲岛鹅尾山东沙滩	福建省	莆田市	秀屿区	3503050552P01	109	110.76	3503050552P01-019	119.119	25.0336	2.77007e+06	411121	2.82	0	2.78534	0.0381865	0.592957	0.754	1.562	-0.406	0.666	169	5.57069	4.53443	71	ENE	0.421791	1.025	3.866	5.78186	1.90406	12.4177	0.963476	0.867171	4.07492
													3503050552P01-020	119.119	25.0336	2.77007e+06	411123	2.663	1.72
													3503050552P01-021	119.119	25.0336	2.77007e+06	411124	2.444	3.29
													3503050552P01-022	119.119	25.0336	2.77007e+06	411126	2.311	4.57
													3503050552P01-023	119.119	25.0336	2.77007e+06	411127	2.216	6.19
													3503050552P01-024	119.119	25.0336	2.77006e+06	411129	2.006	8.2
													3503050552P01-025	119.119	25.0336	2.77006e+06	411131	1.788	10.42
													3503050552P01-026	119.119	25.0336	2.77006e+06	411133	1.609	12.61
													3503050552P01-027	119.12	25.0336	2.77006e+06	411136	1.434	15.09
													3503050552P01-028	119.12	25.0336	2.77006e+06	411139	1.21	19.12
													3503050552P01-029	119.12	25.0335	2.77006e+06	411146	1.038	25.85
													3503050552P01-030	119.12	25.0335	2.77006e+06	411154	0.83	35.02
													3503050552P01-031	119.12	25.0335	2.77005e+06	411165	0.6	45.83
													3503050552P01-032	119.12	25.0335	2.77005e+06	411175	0.336	56.4
													3503050552P01-033	119.12	25.0334	2.77005e+06	411184	0.058	66.1
													3503050552P01-034	119.12	25.0334	2.77004e+06	411196	-0.285	78.92
175	过渡型	无	有	FJ281	3503050622	莆田市盘屿北沙滩	福建省	莆田市	秀屿区	3503050622P01	8	56.625	3503050622P01-012	119.044	25.1037	2.77788e+06	403571	2.806	1.09779e-12	2.74174	0.0813974	1.98945	-0.992368	1.54613	0.628658	1.18559	172	5.48349	4.47039	160	SSE	0.303871	0.17	3.108	20.3888	0.323196	27.3506	0.268946	0.203623	3.04251
													3503050622P01-013	119.044	25.1037	2.77788e+06	403572	2.733	2.241
													3503050622P01-014	119.044	25.1037	2.77788e+06	403572	2.595	4.079
													3503050622P01-015	119.044	25.1037	2.77788e+06	403572	2.481	6.093
													3503050622P01-016	119.044	25.1037	2.77789e+06	403573	2.37	7.723
													3503050622P01-017	119.044	25.1037	2.77789e+06	403573	2.239	9.691
													3503050622P01-018	119.044	25.1038	2.77789e+06	403573	2.091	11.815
													3503050622P01-019	119.044	25.1038	2.77789e+06	403573	1.928	13.607
													3503050622P01-020	119.044	25.1038	2.77789e+06	403574	1.722	15.221
													3503050622P01-021	119.044	25.1038	2.7779e+06	403574	1.542	16.894
													3503050622P01-022	119.044	25.1038	2.7779e+06	403574	1.376	18.434
													3503050622P01-023	119.044	25.1038	2.7779e+06	403574	1.165	20.042
													3503050622P01-024	119.044	25.1039	2.7779e+06	403575	0.939	21.691
													3503050622P01-025	119.044	25.1039	2.7779e+06	403575	0.68	23.664
													3503050622P01-026	119.044	25.1039	2.7779e+06	403575	0.428	25.392
													3503050622P01-027	119.044	25.1039	2.7779e+06	403575	0.292	26.426
													3503050622P01-028	119.044	25.1039	2.77791e+06	403576	0.123	27.956
													3503050622P01-029	119.044	25.1039	2.77791e+06	403576	0.071	30.581
													3503050622P01-030	119.044	25.104	2.77791e+06	403577	-0.021	36.075
176	过渡型	无	有	FJ282	3503050632	莆田市盘屿西南沙滩	福建省	莆田市	秀屿区	3503050632P01	214	44.56	3503050632P01-009	119.045	25.1016	2.77765e+06	403696	2.885	0	2.74174	0.0592214	1.26783	-0.342367	1.19426	0.0955328	1.06606	172	5.48349	4.47039	160	SSE	0.303871	0.17	3.108	20.3888	0.46664	18.9431	0.268946	0.203623	3.04251
													3503050632P01-010	119.045	25.1016	2.77765e+06	403695	2.683	1.13
													3503050632P01-011	119.045	25.1016	2.77765e+06	403694	2.439	2.47
													3503050632P01-012	119.045	25.1016	2.77765e+06	403694	2.312	3.62
													3503050632P01-013	119.045	25.1016	2.77765e+06	403693	2.141	4.89
													3503050632P01-014	119.045	25.1016	2.77765e+06	403693	2.058	5.59
													3503050632P01-015	119.045	25.1016	2.77764e+06	403692	1.907	7.02
													3503050632P01-016	119.045	25.1015	2.77764e+06	403691	1.743	8.61
													3503050632P01-017	119.045	25.1015	2.77764e+06	403690	1.577	10.32
													3503050632P01-018	119.045	25.1015	2.77764e+06	403689	1.457	11.8
													3503050632P01-019	119.045	25.1015	2.77764e+06	403688	1.335	13.27
													3503050632P01-020	119.045	25.1015	2.77764e+06	403687	1.225	14.73
													3503050632P01-021	119.045	25.1015	2.77764e+06	403687	1.097	16.26
													3503050632P01-022	119.045	25.1015	2.77764e+06	403686	0.912	17.96
													3503050632P01-023	119.045	25.1015	2.77764e+06	403685	0.766	19.01
													3503050632P01-024	119.045	25.1015	2.77763e+06	403684	0.672	20.45
													3503050632P01-025	119.045	25.1014	2.77763e+06	403681	0.685	26.8
													3503050632P01-026	119.045	25.1013	2.77762e+06	403675	0.599	36.32
177	过渡型	无	有	FJ283	3503050642	莆田市盘屿东沙滩	福建省	莆田市	秀屿区	3503050642P01	154	77.88	3503050642P01-017	119.05	25.1027	2.77777e+06	404223	2.959	0	2.76537	0.0731921	0.658447	0.602861	1.21523	0.0289288	1.21527	171	5.53074	4.50376	66	ENE	0.241008	0.357	2.857	11.4669	1.34416	10.2292	0.482321	0.393561	3.50787
													3503050642P01-018	119.05	25.1027	2.77777e+06	404223	2.697	1.3
													3503050642P01-019	119.05	25.1027	2.77777e+06	404224	2.559	2.28
													3503050642P01-020	119.05	25.1027	2.77777e+06	404224	2.373	3.43
													3503050642P01-021	119.051	25.1027	2.77777e+06	404225	2.184	4.61
													3503050642P01-022	119.051	25.1027	2.77776e+06	404225	2.014	5.89
													3503050642P01-023	119.051	25.1027	2.77776e+06	404226	1.799	7.14
													3503050642P01-024	119.051	25.1027	2.77776e+06	404227	1.614	8.36
													3503050642P01-025	119.051	25.1026	2.77776e+06	404227	1.465	9.63
													3503050642P01-026	119.051	25.1026	2.77776e+06	404228	1.265	11.05
													3503050642P01-027	119.051	25.1026	2.77776e+06	404228	1.077	12.47
													3503050642P01-028	119.051	25.1026	2.77776e+06	404229	0.876	14.02
													3503050642P01-029	119.051	25.1026	2.77776e+06	404230	0.681	15.39
													3503050642P01-030	119.051	25.1026	2.77775e+06	404230	0.541	16.76
													3503050642P01-031	119.051	25.1026	2.77775e+06	404231	0.364	18.32
													3503050642P01-032	119.051	25.1026	2.77775e+06	404232	0.227	19.8
													3503050642P01-033	119.051	25.1025	2.77775e+06	404232	0.085	21.37
													3503050642P01-034	119.051	25.1025	2.77775e+06	404233	-0.084	23.22
													3503050642P01-035	119.051	25.1025	2.77775e+06	404234	-0.385	25.81
													3503050642P01-036	119.051	25.1025	2.77774e+06	404235	-0.493	27.63
													3503050642P01-037	119.051	25.1025	2.77774e+06	404236	-0.635	30.58
													3503050642P01-038	119.051	25.1024	2.77774e+06	404239	-0.758	36.89
													3503050642P01-039	119.051	25.1024	2.77773e+06	404240	-0.827	39.61
													3503050642P01-040	119.051	25.1023	2.77773e+06	404243	-0.943	46.84
													3503050642P01-041	119.051	25.1023	2.77772e+06	404246	-1.139	53.71
178	过渡型	无	有	FJ285	3503050661	莆田市梯亭村沙滩	福建省	莆田市	秀屿区	3503050661P01	215	45.9	3503050661P01-010	119.038	25.1258	2.78034e+06	402947	2.957	0	2.74174	0.105832	0.437137	1.19384	0.375496	-0.0148411	2.15757	172	5.48349	4.47039	160	SSE	0.303871	0.17	3.108	20.3888	1.34925	6.55149	0.268946	0.203623	3.04251
													3503050661P01-011	119.038	25.1258	2.78034e+06	402946	2.728	1.27
													3503050661P01-012	119.038	25.1258	2.78034e+06	402945	2.534	2.58
													3503050661P01-013	119.038	25.1258	2.78034e+06	402944	2.369	3.65
													3503050661P01-014	119.038	25.1258	2.78033e+06	402944	2.176	5.11
													3503050661P01-015	119.038	25.1258	2.78033e+06	402943	1.978	6.55
													3503050661P01-016	119.038	25.1258	2.78033e+06	402942	1.797	8.08
													3503050661P01-017	119.038	25.1258	2.78033e+06	402941	1.649	9.43
													3503050661P01-018	119.038	25.1257	2.78033e+06	402940	1.505	10.8
													3503050661P01-019	119.038	25.1257	2.78033e+06	402940	1.391	12.02
													3503050661P01-020	119.038	25.1257	2.78033e+06	402939	1.228	13.36
													3503050661P01-021	119.038	25.1257	2.78033e+06	402938	1.068	14.69
													3503050661P01-022	119.038	25.1257	2.78033e+06	402937	0.952	16.17
													3503050661P01-023	119.038	25.1257	2.78032e+06	402936	0.849	17.51
													3503050661P01-024	119.038	25.1257	2.78032e+06	402935	0.703	19.12
													3503050661P01-025	119.038	25.1257	2.78032e+06	402935	0.538	20.58
													3503050661P01-026	119.038	25.1257	2.78032e+06	402934	0.43	22.02
													3503050661P01-027	119.038	25.1257	2.78032e+06	402933	0.299	23.84
													3503050661P01-028	119.038	25.1256	2.78032e+06	402932	0.167	25.22
													3503050661P01-029	119.037	25.1256	2.78032e+06	402931	-0.026	26.95
													3503050661P01-030	119.037	25.1256	2.78032e+06	402930	-0.125	28.43
													3503050661P01-031	119.037	25.1256	2.78032e+06	402930	-0.212	29.05
179	过渡型	无	有	FJ286	3505050011	泉州市后埭村沙滩	福建省	泉州市	泉港区	3505050011P01	52	58.62	3505050011P01-013	118.914	25.2351	2.79254e+06	390573	2.758	0	2.74174	0.0509575	1.09945	-0.136778	1.36058	-0.334	0.571165	172	5.48349	4.47039	160	SSE	0.303871	0.17	3.108	20.3888	0.528828	16.7155	0.268946	0.203623	3.04251
													3505050011P01-014	118.914	25.2351	2.79254e+06	390574	2.597	1.74
													3505050011P01-015	118.914	25.2352	2.79255e+06	390576	2.439	3.73
													3505050011P01-016	118.914	25.2352	2.79255e+06	390577	2.284	5.62
													3505050011P01-017	118.914	25.2352	2.79255e+06	390579	2.144	7.61
													3505050011P01-018	118.914	25.2352	2.79255e+06	390580	2.009	9.44
													3505050011P01-019	118.914	25.2352	2.79255e+06	390582	1.886	11.11
													3505050011P01-020	118.914	25.2352	2.79255e+06	390583	1.748	12.84
													3505050011P01-021	118.914	25.2352	2.79255e+06	390584	1.638	14.72
													3505050011P01-022	118.914	25.2352	2.79255e+06	390586	1.508	16.75
													3505050011P01-023	118.914	25.2352	2.79256e+06	390587	1.397	18.47
													3505050011P01-024	118.914	25.2353	2.79256e+06	390589	1.229	20.61
													3505050011P01-025	118.914	25.2353	2.79256e+06	390591	1.069	23.17
													3505050011P01-026	118.914	25.2353	2.79256e+06	390593	0.986	25.76
													3505050011P01-027	118.914	25.2353	2.79256e+06	390599	0.882	32.93
													3505050011P01-028	118.914	25.2353	2.79257e+06	390603	0.761	37.77
201	过渡型	无	有	FJ309	3505210161	惠安县崇武海滨森林公园沙滩	福建省	泉州市	惠安县	3505210161P02	83	224.6	3505210161P02-021	118.907	24.9218	2.75783e+06	389621	2.875	0	2.7362	0.021472	0.194341	2.36333	0.446554	0.00802383	1.5301	173	5.47241	4.44759	85	E	0.446366	1.25	5.023	5.12909	10.3292	2.26992	1.06694	0.93219	4.55054
													3505210161P02-022	118.907	24.9218	2.75783e+06	389623	2.633	1.78
													3505210161P02-023	118.907	24.9218	2.75783e+06	389625	2.356	3.66
													3505210161P02-024	118.907	24.9218	2.75783e+06	389630	2.169	8.77
													3505210161P02-025	118.907	24.9218	2.75783e+06	389636	2.031	15.55
													3505210161P02-026	118.908	24.9218	2.75783e+06	389649	1.848	27.96
													3505210161P02-027	118.908	24.9218	2.75783e+06	389660	1.612	39.23
													3505210161P02-028	118.908	24.9218	2.75784e+06	389670	1.467	49.09
													3505210161P02-029	118.908	24.9218	2.75784e+06	389680	1.429	59.71
													3505210161P02-030	118.908	24.9218	2.75784e+06	389694	1.248	73.77
													3505210161P02-031	118.908	24.9218	2.75784e+06	389712	0.955	91.59
													3505210161P02-032	118.908	24.9219	2.75784e+06	389733	0.461	113.1
													3505210161P02-033	118.909	24.9219	2.75784e+06	389753	-0.009	132.75
													3505210161P02-034	118.909	24.9219	2.75785e+06	389774	-0.556	153.69
													3505210161P02-035	118.909	24.9219	2.75785e+06	389789	-0.942	169.46
													3505210161P02-036	118.909	24.9219	2.75785e+06	389809	-1.396	189.42
203	过渡型	无	有	FJ310-1	3505210181	惠安县峰上村沙滩	福建省	泉州市	惠安县	3505210181P01	42	409.26	3505210181P01-013	118.926	24.9008	2.75549e+06	391471	2.956	0	2.7362	0.0127532	0.785975	0.347444	1.38056	-0.304933	0.772526	173	5.47241	4.44759	85	E	0.446366	1.25	5.023	5.12909	1.91982	12.2128	1.06694	0.93219	4.55054
													3505210181P01-014	118.926	24.9008	2.75549e+06	391472	2.744	2.13
													3505210181P01-015	118.926	24.9008	2.75549e+06	391474	2.546	4.53
													3505210181P01-016	118.926	24.9008	2.75549e+06	391475	2.373	6.11
													3505210181P01-017	118.926	24.9008	2.7555e+06	391478	2.126	10.42
													3505210181P01-018	118.926	24.9009	2.75551e+06	391488	1.849	25.56
													3505210181P01-019	118.926	24.9011	2755530	391507	1.365	53.75
													3505210181P01-020	118.926	24.9013	2.75555e+06	391524	0.901	79.04
													3505210181P01-021	118.927	24.9015	2.75557e+06	391541	0.567	104.06
													3505210181P01-022	118.927	24.9017	2.7556e+06	391567	0.086	142.79
													3505210181P01-023	118.927	24.902	2.75562e+06	391592	-0.289	180.13
													3505210181P01-024	118.927	24.9025	2.75568e+06	391640	-1.018	250.96
													3505210181P01-025	118.928	24.9027	2.7557e+06	391663	-1.334	286.05
													3505210181P01-026	118.928	24.9031	2.75575e+06	391703	-1.798	345.27
													3505210181P01-027	118.928	24.9032	2.75576e+06	391715	-1.858	362.98
205	过渡型	无	有	FJ310-3	3505210201	惠安县蜈蚣山南沙滩	福建省	泉州市	惠安县	3505210201P01	59	153.56	3505210201P01-016	118.94	24.8928	2.7546e+06	392866	2.825	0	2.7362	0.0337793	0.582723	0.779117	1.69265	-0.694959	0.857851	173	5.47241	4.44759	85	E	0.446366	1.25	5.023	5.12909	2.60378	9.00474	1.06694	0.93219	4.55054
													3505210201P01-017	118.94	24.8928	2.7546e+06	392867	2.732	1.45
													3505210201P01-018	118.94	24.8928	2.7546e+06	392869	2.561	3.05
													3505210201P01-019	118.94	24.8928	2.7546e+06	392870	2.412	4.63
													3505210201P01-020	118.94	24.8928	2.7546e+06	392871	2.255	6.3
													3505210201P01-021	118.94	24.8928	2.7546e+06	392873	2.063	7.97
													3505210201P01-022	118.94	24.8929	2.7546e+06	392874	1.895	9.72
													3505210201P01-023	118.94	24.8929	2.7546e+06	392876	1.689	11.57
													3505210201P01-024	118.94	24.8929	2.7546e+06	392877	1.59	13.42
													3505210201P01-025	118.94	24.8929	2.75461e+06	392883	1.344	20.11
													3505210201P01-026	118.94	24.8929	2.75461e+06	392891	1.009	29.12
													3505210201P01-027	118.94	24.893	2.75461e+06	392895	0.795	33.63
													3505210201P01-028	118.94	24.893	2.75462e+06	392898	0.755	36.94
													3505210201P01-029	118.94	24.893	2.75462e+06	392910	0.361	51.17
													3505210201P01-030	118.94	24.8931	2.75463e+06	392919	0.119	61.1
													3505210201P01-031	118.94	24.8932	2.75464e+06	392931	-0.206	75.06
													3505210201P01-032	118.94	24.8932	2.75464e+06	392942	-0.523	87.98
													3505210201P01-033	118.941	24.8933	2.75465e+06	392949	-0.702	96.34
													3505210201P01-034	118.941	24.8933	2.75465e+06	392958	-0.828	106.84
233	过渡型	无	有	FJ330	3505810131	石狮市浯沙村东沙滩	福建省	泉州市	石狮市	3505810131P01	135	69.86	3505810131P01-014	118.699	24.6699	2.73012e+06	368338	2.711	0	2.56994	0.0872573	0.732624	0.448855	1.07127	0.0920378	0.968744	177	5.13989	4.17062	85	E	0.47611	1.307	5.508	4.6288	1.9693	11.3947	1.11041	0.939688	4.94846
													3505810131P01-015	118.699	24.6699	2.73012e+06	368339	2.526	1.42
													3505810131P01-016	118.699	24.6699	2.73012e+06	368340	2.364	2.86
													3505810131P01-017	118.699	24.6699	2.73011e+06	368342	2.119	4.79
													3505810131P01-018	118.699	24.6699	2.73011e+06	368343	1.933	6.31
													3505810131P01-019	118.699	24.6699	2.73011e+06	368344	1.785	7.72
													3505810131P01-020	118.699	24.6699	2.73011e+06	368345	1.611	9.2
													3505810131P01-021	118.699	24.6699	2.73011e+06	368346	1.444	10.56
													3505810131P01-022	118.699	24.6699	2.73011e+06	368347	1.245	12.05
													3505810131P01-023	118.699	24.6699	2.73011e+06	368348	1.083	13.4
													3505810131P01-024	118.699	24.6698	2.73011e+06	368349	0.909	14.96
													3505810131P01-025	118.699	24.6698	2.73011e+06	368350	0.726	16.54
													3505810131P01-026	118.699	24.6698	2.7301e+06	368352	0.539	18.84
													3505810131P01-027	118.699	24.6698	2.7301e+06	368353	0.36	20.93
													3505810131P01-028	118.699	24.6698	2.7301e+06	368354	0.189	22.8
													3505810131P01-029	118.699	24.6698	2.7301e+06	368356	-0.056	25.66
													3505810131P01-030	118.699	24.6698	2.7301e+06	368358	-0.222	27.76
													3505810131P01-031	118.7	24.6697	2.7301e+06	368359	-0.421	29.75
													3505810131P01-032	118.7	24.6697	2.73009e+06	368365	-0.665	37.99
243	过渡型	无	有	FJ339	3505820081	晋江市金沙湾沙滩	福建省	泉州市	晋江市	3505820081P03	119	143.99	3505820081P03-018	118.574	24.5211	2.71376e+06	355516	2.814	0	2.51879	0.0386671	0.366253	1.44909	0.996446	-0.378804	0.769464	178	5.03758	4.09205	72	ENE	0.593714	1.461	5.216	3.73637	5.12275	5.31312	1.34826	1.19707	4.95359
													3505820081P03-019	118.574	24.5211	2.71376e+06	355518	2.481	2.67
													3505820081P03-020	118.574	24.5211	2.71375e+06	355520	2.153	5.09
													3505820081P03-021	118.574	24.5211	2.71375e+06	355522	1.828	7.49
													3505820081P03-022	118.574	24.5211	2.71375e+06	355523	1.78	8.35
													3505820081P03-023	118.574	24.5211	2.71375e+06	355524	1.741	9.63
													3505820081P03-024	118.574	24.5211	2.71375e+06	355532	1.753	19.03
													3505820081P03-025	118.575	24.521	2.71374e+06	355539	1.58	27.13
													3505820081P03-026	118.575	24.521	2.71374e+06	355541	1.66	29.16
													3505820081P03-027	118.575	24.521	2.71374e+06	355545	1.687	34.14
													3505820081P03-028	118.575	24.5209	2.71374e+06	355554	1.439	43.69
													3505820081P03-029	118.575	24.5209	2.71373e+06	355562	1.173	52.69
													3505820081P03-030	118.575	24.5209	2.71373e+06	355568	0.912	60.39
													3505820081P03-031	118.575	24.5208	2.71372e+06	355576	0.558	69.18
													3505820081P03-032	118.575	24.5208	2.71372e+06	355585	0.107	79.41
													3505820081P03-033	118.575	24.5207	2.71371e+06	355595	-0.549	91.42
													3505820081P03-034	118.575	24.5207	2.71371e+06	355602	-1.129	98.49
													3505820081P03-035	118.575	24.5207	2.71371e+06	355604	-1.258	100.65
													3505820081P03-036	118.575	24.5207	2.7137e+06	355608	-1.528	106.35
244	过渡型	无	有	FJ340	3505820091	晋江市月亮湾沙滩	福建省	泉州市	晋江市	3505820091P01	228	80.6	3505820091P01-012	118.571	24.5145	2.71303e+06	355157	2.581	0	2.45483	0.0609562	0.509491	0.97287	0.323835	0.143467	0.753154	179	4.90966	3.99112	88	E	0.583483	0.976	5.003	5.04372	2.62015	7.78668	0.973421	0.81176	4.77114
													3505820091P01-013	118.571	24.5145	2.71302e+06	355156	2.402	1.58
													3505820091P01-014	118.571	24.5145	2.71302e+06	355155	2.207	3.53
													3505820091P01-015	118.571	24.5145	2.71302e+06	355153	2.006	5.7
													3505820091P01-016	118.571	24.5145	2.71302e+06	355152	1.87	7.48
													3505820091P01-017	118.571	24.5144	2.71302e+06	355150	1.745	9.54
													3505820091P01-018	118.571	24.5144	2.71302e+06	355148	1.541	11.88
													3505820091P01-019	118.571	24.5144	2.71302e+06	355147	1.374	13.8
													3505820091P01-020	118.571	24.5144	2.71301e+06	355145	1.261	16.25
													3505820091P01-021	118.571	24.5144	2.71301e+06	355144	1.102	18.34
													3505820091P01-022	118.571	24.5144	2.71301e+06	355141	0.913	21.26
													3505820091P01-023	118.571	24.5144	2.71301e+06	355139	0.791	23.94
													3505820091P01-024	118.571	24.5143	2.71301e+06	355137	0.641	26.87
													3505820091P01-025	118.571	24.5143	2.71301e+06	355135	0.491	29.91
													3505820091P01-026	118.571	24.5143	2.713e+06	355131	0.237	34.63
													3505820091P01-027	118.571	24.5143	2.713e+06	355128	-0.026	39.27
													3505820091P01-028	118.571	24.5142	2.713e+06	355124	-0.289	43.86
													3505820091P01-029	118.571	24.5142	2.71299e+06	355121	-0.514	48.64
													3505820091P01-030	118.57	24.5142	2.71299e+06	355117	-0.779	52.92
													3505820091P01-031	118.57	24.5142	2.71299e+06	355115	-0.972	56.44
													3505820091P01-032	118.57	24.5141	2.71299e+06	355113	-1.117	59.31
245	过渡型	无	有	FJ341	3505820101	晋江市触角沙滩	福建省	泉州市	晋江市	3505820101P01	218	161.2	3505820101P01-037	118.571	24.5475	2.71669e+06	355190	2.61	0	2.45483	0.109356	0.413345	1.27458	0.651748	-0.0335773	1.04843	179	4.90966	3.99112	88	E	0.583483	0.976	5.003	5.04372	3.3236	6.13861	0.973421	0.81176	4.77114
													3505820101P01-038	118.571	24.5475	2.71668e+06	355188	2.268	2.95
													3505820101P01-039	118.571	24.5475	2.71668e+06	355186	1.811	6.43
													3505820101P01-040	118.571	24.5475	2.71668e+06	355184	1.541	8.67
													3505820101P01-041	118.571	24.5475	2.71668e+06	355184	1.53	8.78
													3505820101P01-042	118.571	24.5475	2.71668e+06	355182	1.155	11.71
													3505820101P01-043	118.571	24.5474	2.71667e+06	355181	0.806	14.68
													3505820101P01-044	118.571	24.5474	2.71667e+06	355178	0.45	18.16
													3505820101P01-045	118.571	24.5474	2.71667e+06	355177	0.282	19.97
													3505820101P01-046	118.571	24.5474	2.71667e+06	355176	0.183	21.32
													3505820101P01-047	118.571	24.5474	2.71667e+06	355174	-0.128	24.86
250	过渡型	无	有	FJ342-2	3505820151	晋江市白沙头北沙滩	福建省	泉州市	晋江市	3505820151P02	344	13.58	3505820151P02-011	118.443	24.6306	2.72603e+06	342383	2.497	0	2.45483	0.10875	1.25034	-0.322326	0.98983	0.0492439	0.959836	179	4.90966	3.99112	88	E	0.583483	0.976	5.003	5.04372	1.09004	18.717	0.973421	0.81176	4.77114
													3505820151P02-012	118.443	24.6307	2.72603e+06	342383	2.4	1.52
													3505820151P02-013	118.443	24.6307	2.72603e+06	342382	2.313	2.32
251	过渡型	无	有	FJ342-3	3502130012	厦门小嶝岛***沙滩	福建省	厦门市	翔安区	3502130012P01	43	58.94	3502130012P01-020	118.381	24.5619	2.71822e+06	639924	2.455	0	2.45483	0.0742303	1.79358	-0.842843	1.2306	0.217626	0.904801	179	4.90966	3.99112	88	E	0.583483	0.976	5.003	5.04372	0.80883	25.2244	0.973421	0.81176	4.77114
													3502130012P01-021	118.381	24.5619	2.71822e+06	639926	2.232	2.98
													3502130012P01-022	118.381	24.5619	2.71823e+06	639928	1.996	6.11
													3502130012P01-023	118.381	24.5619	2.71823e+06	639930	1.797	8.66
													3502130012P01-024	118.381	24.5619	2.71823e+06	639931	1.624	11.03
													3502130012P01-025	118.381	24.562	2.71823e+06	639934	1.317	14.51
													3502130012P01-026	118.381	24.562	2.71824e+06	639936	1.044	17.81
													3502130012P01-027	118.381	24.562	2.71824e+06	639939	0.69	22.2
													3502130012P01-028	118.381	24.562	2.71824e+06	639942	0.292	26.2
													3502130012P01-029	118.381	24.5621	2.71824e+06	639944	0.094	29.11
													3502130012P01-030	118.381	24.5621	2.71825e+06	639946	-0.15	32.82
													3502130012P01-031	118.381	24.5621	2.71825e+06	639945	-0.099	31.66
													3502130012P01-032	118.381	24.5621	2.71825e+06	639948	-0.307	36.48
													3502130012P01-033	118.381	24.5621	2.71825e+06	639950	-0.372	38.06
253	过渡型	无	有	FJ342-5	3502130032	厦门小嶝岛海豚湾沙滩	福建省	厦门市	翔安区	3502130032P01	14	40.12	3502130032P01-011	118.388	24.5604	2.71807e+06	640627	2.493	0	2.45483	0.101718	1.19638	-0.258675	1.15531	-0.128882	0.998346	179	4.90966	3.99112	88	E	0.583483	0.976	5.003	5.04372	1.13269	18.0122	0.973421	0.81176	4.77114
													3502130032P01-012	118.388	24.5604	2.71807e+06	640628	2.375	1.75
													3502130032P01-013	118.388	24.5604	2.71807e+06	640628	2.228	3.9
													3502130032P01-014	118.388	24.5604	2.71807e+06	640628	2.133	5.55
													3502130032P01-015	118.388	24.5605	2.71807e+06	640629	1.984	7.22
													3502130032P01-016	118.388	24.5605	2.71808e+06	640629	1.819	8.73
													3502130032P01-017	118.388	24.5605	2.71808e+06	640629	1.642	9.96
													3502130032P01-018	118.388	24.5605	2.71808e+06	640630	1.441	11.41
													3502130032P01-019	118.388	24.5605	2.71808e+06	640630	1.231	12.75
													3502130032P01-020	118.388	24.5605	2.71808e+06	640630	1.053	14.18
													3502130032P01-021	118.388	24.5605	2.71808e+06	640631	0.834	15.77
													3502130032P01-022	118.388	24.5605	2.71808e+06	640631	0.666	17.12
													3502130032P01-023	118.388	24.5606	2.71809e+06	640632	0.521	18.64
													3502130032P01-024	118.388	24.5606	2.71809e+06	640632	0.373	20.35
													3502130032P01-025	118.388	24.5606	2.71809e+06	640632	0.362	21.54
254	过渡型	无	有	FJ343	3502130042	厦门小嶝岛月亮湾沙滩	福建省	厦门市	翔安区	3502130042P02	104	43.47	3502130042P02-014	118.391	24.5587	2.71788e+06	640889	2.597	0	2.45483	0.0875052	1.43351	-0.519548	1.44312	0.264423	1.03015	179	4.90966	3.99112	88	E	0.583483	0.976	5.003	5.04372	0.970422	21.0241	0.973421	0.81176	4.77114
													3502130042P02-015	118.391	24.5587	2.71788e+06	640891	2.338	2.02
													3502130042P02-016	118.391	24.5587	2.71788e+06	640893	2.044	4.45
													3502130042P02-017	118.391	24.5587	2.71788e+06	640896	1.786	6.73
													3502130042P02-018	118.391	24.5587	2.71788e+06	640898	1.535	9.01
													3502130042P02-019	118.391	24.5587	2.71788e+06	640900	1.256	11.31
													3502130042P02-020	118.391	24.5587	2.71788e+06	640902	0.952	13.6
													3502130042P02-021	118.391	24.5586	2.71788e+06	640905	0.652	16.1
													3502130042P02-022	118.391	24.5586	2.71788e+06	640906	0.512	17.34
													3502130042P02-023	118.391	24.5586	2.71788e+06	640907	0.406	18.19
													3502130042P02-024	118.391	24.5586	2.71788e+06	640907	0.339	18.58
													3502130042P02-025	118.391	24.5586	2.71788e+06	640908	0.318	19.73
													3502130042P02-026	118.391	24.5586	2.71788e+06	640910	0.305	21.09
													3502130042P02-027	118.391	24.5586	2.71787e+06	640912	0.278	23.02
													3502130042P02-028	118.391	24.5586	2.71787e+06	640915	0.237	26.03
256	过渡型	无	有	FJ342-6	3502130062	厦门小嶝岛***沙滩	福建省	厦门市	翔安区	3502130062P01	45	75.54	3502130062P01-015	118.393	24.5616	2.7182e+06	641126	2.508	0	2.45483	0.0770209	1.73567	-0.79549	1.31707	0.326513	1.09442	179	4.90966	3.99112	88	E	0.583483	0.976	5.003	5.04372	0.830169	24.576	0.973421	0.81176	4.77114
													3502130062P01-016	118.393	24.5616	2.7182e+06	641126	2.42	0.85
													3502130062P01-017	118.393	24.5616	2.7182e+06	641128	2.316	2.38
													3502130062P01-018	118.393	24.5616	2.7182e+06	641128	2.184	3.5
													3502130062P01-019	118.393	24.5616	2.7182e+06	641129	2.041	4.91
													3502130062P01-020	118.393	24.5616	2.71821e+06	641132	1.74	9.37
													3502130062P01-021	118.393	24.5616	2.71821e+06	641135	1.489	13.2
													3502130062P01-022	118.393	24.5617	2.71821e+06	641137	1.281	16.22
													3502130062P01-023	118.393	24.5617	2.71821e+06	641138	1.149	18.35
													3502130062P01-024	118.393	24.5617	2.71822e+06	641140	0.896	20.91
													3502130062P01-025	118.393	24.5617	2.71822e+06	641142	0.649	24.34
													3502130062P01-026	118.393	24.5617	2.71822e+06	641144	0.384	27.17
													3502130062P01-027	118.393	24.5618	2.71822e+06	641146	0.124	30.42
													3502130062P01-028	118.393	24.5618	2.71823e+06	641148	-0.188	33.83
													3502130062P01-029	118.393	24.5618	2.71823e+06	641151	-0.529	37.71
													3502130062P01-030	118.393	24.5618	2.71823e+06	641153	-0.829	41.52
													3502130062P01-031	118.393	24.5619	2.71823e+06	641156	-1.042	45.11
													3502130062P01-032	118.393	24.5619	2.71824e+06	641157	-1.203	47.64
													3502130062P01-033	118.393	24.5619	2.71824e+06	641159	-1.336	49.64
													3502130062P01-034	118.393	24.5619	2.71824e+06	641159	-1.421	50.69
													3502130062P01-035	118.393	24.5619	2.71824e+06	641160	-1.515	51.94
257	过渡型	无	有	FJ357	3506040011	漳州市南太武沙滩	福建省	漳州市	龙海区	3506040011P02	85	67.5	3506040011P02-013	118.052	24.3751	2.69724e+06	606742	2.482	0	2.29899	0.0441391	0.522335	0.936952	1.35134	-0.0776634	0.654448	182	4.59798	3.75024	157	SSE	0.517667	0.345	5.753	8.85637	1.26424	8.00234	0.519172	0.356754	5.13173
													3506040011P02-014	118.052	24.3751	2.69724e+06	606745	2.226	3.2
													3506040011P02-015	118.052	24.3751	2.69724e+06	606748	2.008	6.34
													3506040011P02-016	118.052	24.3751	2.69724e+06	606751	1.806	9.09
													3506040011P02-017	118.052	24.3751	2.69724e+06	606754	1.594	12.12
													3506040011P02-018	118.052	24.3751	2.69724e+06	606757	1.377	14.67
													3506040011P02-019	118.052	24.3751	2.69724e+06	606760	1.126	18.32
													3506040011P02-020	118.052	24.3751	2.69724e+06	606762	1.036	19.75
													3506040011P02-021	118.052	24.3751	2.69724e+06	606763	1.01	21.16
													3506040011P02-022	118.052	24.3751	2.69725e+06	606765	0.94	23.3
													3506040011P02-023	118.052	24.3752	2.69725e+06	606768	0.882	26.43
													3506040011P02-024	118.052	24.3752	2.69725e+06	606771	0.81	28.89
													3506040011P02-025	118.052	24.3752	2.69725e+06	606775	0.67	33.3
													3506040011P02-026	118.052	24.3752	2.69725e+06	606779	0.573	37.4
													3506040011P02-027	118.052	24.3752	2.69725e+06	606783	0.502	40.97
													3506040011P02-028	118.052	24.3752	2.69725e+06	606785	0.475	42.87
258	过渡型	无	有	FJ358	3506040022	漳州市浯屿岛后江沙滩	福建省	漳州市	龙海区	3506040022P02	96	146.14	3506040022P02-021	118.146	24.3301	2.69233e+06	616331	2.413	0	2.25459	0.0258027	0.282305	1.82467	0.620401	-0.50453	1.03065	183	4.50918	3.69058	92	E	0.53275	1.051	5.387	4.33407	5.36423	3.8218	1.0404	0.855365	5.07489
													3506040022P02-022	118.146	24.3301	2.69233e+06	616332	2.237	1.68
													3506040022P02-023	118.146	24.3301	2.69233e+06	616334	2.031	3.45
													3506040022P02-024	118.146	24.3301	2.69233e+06	616336	1.853	5.05
													3506040022P02-025	118.146	24.3301	2.69233e+06	616337	1.7	6.68
													3506040022P02-026	118.146	24.3301	2.69233e+06	616339	1.538	8.35
													3506040022P02-027	118.146	24.3301	2.69233e+06	616341	1.431	10.02
													3506040022P02-028	118.146	24.3301	2.69233e+06	616342	1.449	10.96
													3506040022P02-029	118.146	24.3301	2.69233e+06	616349	1.343	18.05
													3506040022P02-030	118.146	24.3301	2.69233e+06	616360	1.184	29.03
													3506040022P02-031	118.147	24.3301	2.69233e+06	616371	0.972	40.85
													3506040022P02-032	118.147	24.3301	2.69233e+06	616383	0.78	52.44
													3506040022P02-033	118.147	24.3301	2.69233e+06	616393	0.526	62.85
													3506040022P02-034	118.147	24.33	2.69232e+06	616404	0.267	73.65
													3506040022P02-035	118.147	24.33	2.69232e+06	616412	0.095	81.61
													3506040022P02-036	118.147	24.33	2.69232e+06	616418	-0.044	88.07
													3506040022P02-037	118.147	24.33	2.69232e+06	616427	-0.259	96.53
													3506040022P02-038	118.147	24.33	2.69232e+06	616437	-0.537	107.16
													3506040022P02-039	118.147	24.33	2.69232e+06	616444	-0.656	113.8
262	过渡型	无	有	FJ361	3506040061	漳州市白坑村沙滩	福建省	漳州市	龙海区	3506040061P01	71	80.39	3506040061P01-015	118.129	24.2835	2.68716e+06	614616	2.588	0	2.25459	0.0272907	0.338611	1.5623	0.459368	-0.234036	1.18621	183	4.50918	3.69058	92	E	0.53275	1.051	5.387	4.33407	4.24961	4.82421	1.0404	0.855365	5.07489
													3506040061P01-016	118.129	24.2835	2.68716e+06	614621	2.058	4.85
													3506040061P01-017	118.129	24.2835	2.68716e+06	614626	1.816	9.84
													3506040061P01-018	118.129	24.2836	2.68716e+06	614631	1.582	15.35
													3506040061P01-019	118.129	24.2836	2.68716e+06	614637	1.331	22.43
													3506040061P01-020	118.129	24.2836	2.68716e+06	614639	1.25	24.5
													3506040061P01-021	118.129	24.2836	2.68717e+06	614645	1.083	30.29
													3506040061P01-022	118.129	24.2836	2.68717e+06	614651	1.026	36.28
													3506040061P01-023	118.129	24.2836	2.68717e+06	614653	0.994	39.22
													3506040061P01-024	118.129	24.2836	2.68717e+06	614657	0.924	43.05
													3506040061P01-025	118.129	24.2837	2.68717e+06	614664	0.813	50.47
263	过渡型	无	有	FJ362	3506040071	漳州市流会村沙滩	福建省	漳州市	龙海区	3506040071P02	79	52.13	3506040071P02-018	118.135	24.2747	2.68619e+06	615231	2.291	0	2.25459	0.0290181	0.407169	1.2963	0.948718	-0.385207	0.971372	183	4.50918	3.69058	92	E	0.53275	1.051	5.387	4.33407	3.39929	6.03096	1.0404	0.855365	5.07489
													3506040071P02-019	118.135	24.2747	2.68619e+06	615234	2.173	2.94
													3506040071P02-020	118.135	24.2747	2.68619e+06	615237	2.118	6.56
													3506040071P02-021	118.135	24.2747	2.68619e+06	615242	1.97	11.01
													3506040071P02-022	118.135	24.2748	2.68619e+06	615247	1.8	16.86
													3506040071P02-023	118.135	24.2748	2.68619e+06	615252	1.644	21.17
265	过渡型	无	有	FJ363-1	3506040091	漳州市镇海村沙滩	福建省	漳州市	龙海区	3506040091P01	179	55.58	3506040091P01-023	118.087	24.2538	2.68383e+06	610376	2.251	0	2.16159	0.0598291	0.293321	1.76945	0.664689	-0.50964	1.02744	184	4.32319	3.55828	84	E	0.452484	1.354	5.586	3.65106	5.79107	4.01821	1.18409	1.00415	5.08855
													3506040091P01-024	118.087	24.2538	2.68383e+06	610376	2.093	1.67
													3506040091P01-025	118.087	24.2537	2.68382e+06	610376	1.938	3.8
													3506040091P01-026	118.087	24.2537	2.68382e+06	610376	1.781	5.95
													3506040091P01-027	118.087	24.2537	2.68382e+06	610376	1.639	8.05
													3506040091P01-028	118.087	24.2537	2.68382e+06	610376	1.451	11.14
													3506040091P01-029	118.087	24.2536	2.68381e+06	610376	1.187	15.76
													3506040091P01-030	118.087	24.2536	2.68381e+06	610376	1.043	19.22
266	过渡型	无	有	FJ364	3506040101	漳州市隆教湾沙滩	福建省	漳州市	龙海区	3506040101P03	141	48.75	3506040101P03-018	118.068	24.251	2.68351e+06	608455	2.646	0	2.16159	0.119887	0.257952	1.95482	0.489653	-0.470968	1.10627	184	4.32319	3.55828	84	E	0.452484	1.354	5.586	3.65106	6.86821	3.38803	1.18409	1.00415	5.08855
													3506040101P03-019	118.068	24.251	2.6835e+06	608457	2.15	3.29
													3506040101P03-020	118.068	24.251	2.6835e+06	608458	1.803	5.7
													3506040101P03-021	118.068	24.2509	2.6835e+06	608460	1.445	8.71
													3506040101P03-022	118.068	24.2509	2.6835e+06	608461	1.274	10.3
													3506040101P03-023	118.068	24.2509	2.6835e+06	608463	1.027	12.45
													3506040101P03-024	118.068	24.2509	2.68349e+06	608465	0.667	15.66
267	过渡型	无	有	FJ365	3506040111	漳州市白塘湾沙滩	福建省	漳州市	龙海区	3506040111P02	109	110.13	3506040111P02-016	118.043	24.23	2.68116e+06	605957	2.483	0	2.16159	0.0255361	0.274064	1.86742	0.608688	-0.389	1.13106	184	4.32319	3.55828	84	E	0.452484	1.354	5.586	3.65106	6.33199	3.67494	1.18409	1.00415	5.08855
													3506040111P02-017	118.043	24.23	2.68116e+06	605959	2.082	2.57
													3506040111P02-018	118.043	24.23	2.68116e+06	605962	1.678	5.52
													3506040111P02-019	118.043	24.23	2.68116e+06	605963	1.588	6.33
													3506040111P02-020	118.043	24.23	2.68116e+06	605963	1.438	6.48
													3506040111P02-021	118.043	24.23	2.68116e+06	605965	1.34	8.51
													3506040111P02-022	118.043	24.23	2.68116e+06	605966	1.393	10.16
													3506040111P02-023	118.043	24.23	2.68115e+06	605975	1.269	19.26
													3506040111P02-024	118.043	24.2299	2.68115e+06	605980	1.254	24.95
													3506040111P02-025	118.043	24.2299	2.68115e+06	605987	1.218	32.41
													3506040111P02-026	118.044	24.2299	2.68115e+06	605998	1.072	43.6
													3506040111P02-027	118.044	24.2298	2.68114e+06	606010	0.764	55.82
													3506040111P02-028	118.044	24.2298	2.68114e+06	606019	0.473	66.01
													3506040111P02-029	118.044	24.2298	2.68114e+06	606030	0.163	76.75
													3506040111P02-030	118.044	24.2298	2.68114e+06	606022	0.391	68.79
269	过渡型	无	有	FJ367	3506230021	漳浦县江口湾沙滩	福建省	漳州市	漳浦县	3506230021P02	129	128.37	3506230021P02-018	118.002	24.2011	2.67792e+06	601824	2.316	0	2.16159	0.024667	0.254797	1.97258	0.709786	-0.40166	1.24997	184	4.32319	3.55828	84	E	0.452484	1.354	5.586	3.65106	6.98373	3.33199	1.18409	1.00415	5.08855
													3506230021P02-019	118.002	24.2011	2.67792e+06	601826	2.042	2.55
													3506230021P02-020	118.002	24.2011	2.67792e+06	601827	2.01	2.84
													3506230021P02-021	118.002	24.201	2.67792e+06	601829	1.98	6.22
													3506230021P02-022	118.002	24.201	2.67792e+06	601833	1.938	11.11
													3506230021P02-023	118.002	24.201	2.67791e+06	601838	1.866	17.1
													3506230021P02-024	118.002	24.2009	2.67791e+06	601842	1.857	22.2
													3506230021P02-025	118.002	24.2009	2.67791e+06	601846	1.86	27.18
													3506230021P02-026	118.003	24.2009	2.6779e+06	601853	1.622	36.86
													3506230021P02-027	118.003	24.2008	2.6779e+06	601860	1.401	45.54
													3506230021P02-028	118.003	24.2008	2.67789e+06	601868	1.06	56.01
													3506230021P02-029	118.003	24.2007	2.67788e+06	601874	0.802	63
													3506230021P02-030	118.003	24.2007	2.67788e+06	601881	0.446	72.73
													3506230021P02-031	118.003	24.2006	2.67787e+06	601887	0.179	79.87
													3506230021P02-032	118.003	24.2006	2.67787e+06	601895	-0.145	90.35
													3506230021P02-033	118.003	24.2005	2.67786e+06	601902	-0.347	99.4
271	过渡型	无	有	FJ368-1	3506230041	漳浦县后社村沙滩	福建省	漳州市	漳浦县	3506230041P01	141	115.18	3506230041P01-025	117.952	24.1593	2.67326e+06	596729	2.196	0	2.07439	0.0785405	0.198524	2.33261	0.301223	0.176878	1.29078	185	4.14878	3.4482	87	E	0.49731	1.144	5.309	3.4729	9.43351	2.34176	1.19462	0.984899	5.40771
													3506230041P01-026	117.952	24.1593	2.67326e+06	596730	2.065	1.58
													3506230041P01-027	117.952	24.1593	2.67326e+06	596731	1.891	3.61
													3506230041P01-028	117.952	24.1593	2.67326e+06	596732	1.763	5.37
													3506230041P01-029	117.952	24.1593	2.67326e+06	596733	1.579	7.17
													3506230041P01-030	117.952	24.1593	2.67326e+06	596734	1.47	8.87
													3506230041P01-031	117.952	24.1592	2.67325e+06	596736	1.321	11.06
													3506230041P01-032	117.952	24.1592	2.67325e+06	596737	1.173	13.33
													3506230041P01-033	117.952	24.1592	2.67325e+06	596739	1.03	15.66
													3506230041P01-034	117.952	24.1592	2.67325e+06	596740	0.843	18.24
													3506230041P01-035	117.952	24.1592	2.67325e+06	596742	0.631	20.86
													3506230041P01-036	117.952	24.1591	2.67324e+06	596744	0.456	23.45
													3506230041P01-037	117.952	24.1591	2.67324e+06	596746	0.159	26.8
													3506230041P01-038	117.952	24.1591	2.67324e+06	596747	-0.109	29.26
272	过渡型	无	有	FJ368-2	3506230051	漳浦县岗寮村沙滩	福建省	漳州市	漳浦县	3506230051P01	175	73.126	3506230051P01-016	117.981	24.1612	2.67349e+06	599698	2.08	-0.004	2.07439	0.063017	0.196071	2.35055	0.795996	-0.491903	1.97167	185	4.14878	3.4482	87	E	0.49731	1.144	5.309	3.4729	9.60639	2.29961	1.19462	0.984899	5.40771
													3506230051P01-017	117.981	24.1612	2.67349e+06	599697	2.647	-4.157
													3506230051P01-018	117.981	24.1612	2.67349e+06	599698	2.175	-0.826
													3506230051P01-019	117.981	24.1612	2.67349e+06	599698	2.042	0.389
													3506230051P01-020	117.981	24.1611	2.67349e+06	599698	1.888	1.87
													3506230051P01-021	117.981	24.1611	2.67348e+06	599698	1.734	4.007
													3506230051P01-022	117.981	24.1611	2.67348e+06	599698	1.44	8.494
													3506230051P01-023	117.981	24.161	2.67348e+06	599699	1.181	13.116
													3506230051P01-024	117.981	24.161	2.67347e+06	599699	0.929	17.327
													3506230051P01-025	117.981	24.161	2.67347e+06	599700	0.579	22.98
													3506230051P01-026	117.981	24.1609	2.67346e+06	599700	0.266	28.366
													3506230051P01-027	117.981	24.1609	2.67346e+06	599700	0.261	28.45
													3506230051P01-028	117.981	24.1608	2.67345e+06	599701	-0.251	36.776
277	过渡型	无	有	FJ373	3506230101	漳浦县东本山东沙滩	福建省	漳州市	漳浦县	3506230101P01	172	64.36	3506230101P01-031	117.765	23.9172	2.64632e+06	577875	1.824	0	1.70015	0.0750193	0.459081	1.12318	0.84085	0.313629	0.590264	188	3.4003	2.8555	75	ENE	0.461977	1.409	5.1	2.67377	3.70113	6.92948	1.27172	1.11218	4.95858
													3506230101P01-032	117.765	23.9171	2.64632e+06	577875	1.616	2.09
													3506230101P01-033	117.765	23.9171	2.64632e+06	577875	1.455	4
													3506230101P01-034	117.765	23.9171	2.64632e+06	577875	1.356	5.55
													3506230101P01-035	117.765	23.9171	2.64632e+06	577876	1.181	8.01
													3506230101P01-036	117.765	23.9171	2.64631e+06	577876	0.935	11.1
													3506230101P01-037	117.765	23.917	2.64631e+06	577877	0.646	15.02
280	过渡型	无	有	FJ376	3506230131	漳浦县浮头湾沙滩	福建省	漳州市	漳浦县	3506230131P02	132	158.08	3506230131P02-031	117.653	23.9177	2.64633e+06	566457	1.748	0	1.70015	0.0199473	0.326046	1.61685	0.888261	-0.534536	1.24587	188	3.4003	2.8555	75	ENE	0.461977	1.409	5.1	2.67377	5.57429	4.60093	1.27172	1.11218	4.95858
													3506230131P02-032	117.653	23.9177	2.64633e+06	566464	1.568	9.36
													3506230131P02-033	117.653	23.9176	2.64632e+06	566471	1.355	18.59
													3506230131P02-034	117.653	23.9176	2.64631e+06	566478	1.123	28.73
													3506230131P02-035	117.653	23.9175	2.64631e+06	566485	0.905	38.25
													3506230131P02-036	117.653	23.9175	2.6463e+06	566493	0.736	48.36
													3506230131P02-037	117.653	23.9174	2.6463e+06	566495	0.656	51.5
													3506230131P02-038	117.653	23.9174	2.64629e+06	566506	0.368	65
													3506230131P02-039	117.653	23.9173	2.64628e+06	566512	0.28	73.93
281	过渡型	无	有	FJ376	3506230131	漳浦县浮头湾沙滩	福建省	漳州市	漳浦县	3506230131P04	96	121.29	3506230131P04-025	117.624	23.8488	2.63869e+06	563618	1.896	0	1.70015	0.0190044	0.238452	2.06823	0.668429	-0.426681	2.00124	188	3.4003	2.8555	75	ENE	0.461977	1.409	5.1	2.67377	8.43125	3.04189	1.27172	1.11218	4.95858
													3506230131P04-026	117.625	23.8488	2.63869e+06	563628	1.702	9.52
													3506230131P04-027	117.625	23.8488	2.63869e+06	563638	1.558	19.39
													3506230131P04-028	117.625	23.8488	2.63868e+06	563649	1.416	30.89
													3506230131P04-029	117.625	23.8488	2.63868e+06	563658	1.287	40.08
													3506230131P04-030	117.625	23.8488	2.63868e+06	563665	1.135	46.94
													3506230131P04-031	117.625	23.8488	2.63868e+06	563672	0.95	53.82
													3506230131P04-032	117.625	23.8488	2.63868e+06	563679	0.717	61.35
282	过渡型	无	有	FJ380	3506230171	漳浦县杏仔村沙滩	福建省	漳州市	漳浦县	3506230171P02	155	74.39	3506230171P02-024	117.635	23.7873	2.63187e+06	564724	1.774	0	1.70015	0.048366	0.704837	0.504638	0.457333	0.495512	1.03565	188	3.4003	2.8555	75	ENE	0.461977	1.409	5.1	2.67377	2.33968	10.9617	1.27172	1.11218	4.95858
													3506230171P02-025	117.635	23.7873	2.63187e+06	564726	1.488	5.29
													3506230171P02-026	117.635	23.7872	2.63187e+06	564728	1.224	10.15
													3506230171P02-027	117.635	23.7872	2.63186e+06	564731	0.896	17.53
284	过渡型	无	有	FJ381	3506230191	漳浦县古城村沙滩	福建省	漳州市	漳浦县	3506230191P02	135	62.55	3506230191P02-034	117.614	23.764	2.62928e+06	562607	1.795	0	1.70015	0.0813922	0.411111	1.2824	0.724893	-0.258628	1.22835	188	3.4003	2.8555	75	ENE	0.461977	1.409	5.1	2.67377	4.20465	6.09966	1.27172	1.11218	4.95858
													3506230191P02-035	117.614	23.764	2.62928e+06	562608	1.623	1.23
													3506230191P02-036	117.614	23.7639	2.62928e+06	562609	1.445	2.59
													3506230191P02-037	117.614	23.7639	2.62928e+06	562610	1.21	4.28
													3506230191P02-038	117.614	23.7639	2.62928e+06	562611	1.04	6.09
													3506230191P02-039	117.614	23.7639	2.62928e+06	562613	0.929	8.26
													3506230191P02-040	117.614	23.7639	2.62927e+06	562615	0.742	11.27
													3506230191P02-041	117.614	23.7639	2.62927e+06	562619	0.407	16.17
286	过渡型	无	无	FJ384	3506220031	云霄县后江村沙滩	福建省	漳州市	云霄县	3506220031P02	75	36.76	3506220031P02-025	117.47	23.8081	2.63411e+06	547901	1.575	0	1.56916	0.0503937	0.391451	1.3531	1.5186	-0.208524	0.862226	187	3.13832	2.62971	165	SSE	0.391836	0.154	5.246	9.45142	1.37301	5.75613	0.332047	0.22551	4.20141
													3506220031P02-026	117.47	23.8081	2.63411e+06	547905	1.347	3.7
													3506220031P02-027	117.47	23.8081	2.63411e+06	547907	1.255	6.35
295	过渡型	无	有	FJ391	3506260112	东山县马銮湾沙滩	福建省	漳州市	东山县	3506260112P02	155	47.551	3506260112P02-020	117.494	23.7259	2.62501e+06	550397	1.501	-0.003	1.44574	0.0594177	0.20101	2.31466	0.772434	-0.252572	4.24171	189	2.89148	2.42138	75	ENE	0.369476	1.306	4.835	2.30062	10.7441	2.38473	1.25683	1.10185	4.90532
													3506260112P02-021	117.494	23.7258	2.62501e+06	550399	1.187	5.498
													3506260112P02-022	117.494	23.7258	2.62501e+06	550400	1.087	7.181
297	过渡型	无	有	FJ392	3506260132	东山县金銮湾沙滩	福建省	漳州市	东山县	3506260132P02	101	173.635	3506260132P02-030	117.472	23.6896	2.62099e+06	548148	1.626	0.003	1.44574	0.0142346	0.475544	1.07235	1.1744	-0.206085	0.708112	189	2.89148	2.42138	75	ENE	0.369476	1.306	4.835	2.30062	3.55313	7.21102	1.25683	1.10185	4.90532
													3506260132P02-031	117.472	23.6896	2.62099e+06	548155	1.387	6.853
													3506260132P02-032	117.472	23.6896	2.62099e+06	548166	1.281	17.731
													3506260132P02-033	117.472	23.6896	2.62099e+06	548177	1.237	29.188
													3506260132P02-034	117.472	23.6896	2.62099e+06	548187	1.051	40.013
													3506260132P02-035	117.473	23.6895	2.62098e+06	548202	0.805	54.602
													3506260132P02-036	117.473	23.6895	2.62098e+06	548216	0.503	68.955
308	过渡型	无	有	FJ405	3506240061	诏安县烟墩山东沙滩	福建省	漳州市	诏安县	3506240061P01	134	71.5	3506240061P01-020	117.254	23.6196	2.61318e+06	525886	1.397	0	1.28445	0.0589723	0.162279	2.62345	0.447812	0.0221417	1.42751	190	2.56889	2.15074	201	SSW	0.494463	0.302	5.899	6.16553	5.16796	1.72659	0.416653	0.284085	4.66946
													3506240061P01-021	117.254	23.6196	2.61318e+06	525887	1.156	1.3
													3506240061P01-022	117.254	23.6196	2.61318e+06	525888	0.973	3.18
													3506240061P01-023	117.254	23.6196	2.61318e+06	525891	0.787	7.16
													3506240061P01-024	117.254	23.6195	2.61317e+06	525894	0.625	11.08
													3506240061P01-025	117.254	23.6195	2.61317e+06	525896	0.393	13.79
													3506240061P01-026	117.254	23.6195	2.61317e+06	525898	0.319	16.6
													3506240061P01-027	117.254	23.6195	2.61317e+06	525900	0.098	19.66
													3506240061P01-028	117.254	23.6195	2.61317e+06	525903	-0.125	23.46
													3506240061P01-029	117.254	23.6195	2.61316e+06	525904	-0.29	25.82
309	过渡型	无	有	FJ406	3506240071	诏安县烟墩山南沙滩	福建省	漳州市	诏安县	3506240071P01	142	104.69	3506240071P01-022	117.251	23.6116	2.6123e+06	525603	1.519	0	1.28445	0.0555851	0.500235	0.999323	1.05327	-0.344369	1.11117	190	2.56889	2.15074	201	SSW	0.494463	0.302	5.899	6.16553	1.16936	7.63066	0.416653	0.284085	4.66946
													3506240071P01-023	117.251	23.6116	2.6123e+06	525604	1.214	1.69
													3506240071P01-024	117.251	23.6116	2.61229e+06	525605	0.982	4.01
													3506240071P01-025	117.251	23.6116	2.61229e+06	525608	0.813	7.76
													3506240071P01-026	117.251	23.6116	2.61229e+06	525610	0.643	11.15
													3506240071P01-027	117.251	23.6115	2.61229e+06	525612	0.481	14.29
													3506240071P01-028	117.251	23.6115	2.61228e+06	525613	0.358	16.71
													3506240071P01-029	117.251	23.6115	2.61228e+06	525615	0.191	20.19
													3506240071P01-030	117.251	23.6115	2.61228e+06	525617	0.012	23.37
													3506240071P01-031	117.251	23.6115	2.61228e+06	525619	-0.082	25.48
													3506240071P01-032	117.251	23.6114	2.61228e+06	525620	-0.249	28.01
310	过渡型	无	有	FJ407	3506240081	诏安县东门村沙滩	福建省	漳州市	诏安县	3506240081P01	153	129.47	3506240081P01-027	117.247	23.6077	2.61186e+06	525185	1.54	0	1.28445	0.0397829	0.269413	1.89211	0.7064	-0.499062	1.39856	190	2.56889	2.15074	201	SSW	0.494463	0.302	5.899	6.16553	2.48405	3.5921	0.416653	0.284085	4.66946
													3506240081P01-028	117.247	23.6076	2.61185e+06	525189	1.248	7.88
													3506240081P01-029	117.247	23.6075	2.61184e+06	525192	0.987	15.34
													3506240081P01-030	117.247	23.6075	2.61184e+06	525196	0.651	23.14
													3506240081P01-031	117.247	23.6074	2.61183e+06	525200	0.281	32.02
													3506240081P01-032	117.247	23.6073	2.61182e+06	525203	-0.035	40.13
311	过渡型	无	有	FJ408	3506240091	诏安县望洋台沙滩	福建省	漳州市	诏安县	3506240091P02	154	74.95	3506240091P02-023	117.238	23.6051	2.61157e+06	524266	1.406	0	1.28445	0.0498406	0.376384	1.40972	1.27434	-0.592694	0.833162	190	2.56889	2.15074	201	SSW	0.494463	0.302	5.899	6.16553	1.62482	5.49167	0.416653	0.284085	4.66946
													3506240091P02-024	117.238	23.605	2.61156e+06	524267	1.209	3.74
													3506240091P02-025	117.238	23.605	2.61156e+06	524269	0.97	8.3
													3506240091P02-026	117.238	23.605	2.61156e+06	524271	0.788	12.33
													3506240091P02-027	117.238	23.6049	2.61155e+06	524273	0.66	15.16
													3506240091P02-028	117.238	23.6049	2.61155e+06	524273	0.584	16.55
													3506240091P02-029	117.238	23.6049	2.61155e+06	524275	0.405	19.99
													3506240091P02-030	117.238	23.6049	2.61155e+06	524276	0.271	22.56

## Sheet: 耗散型
序号	类型	有无海堤	有无干滩	沙滩编码	沙滩代码	沙滩名称	地理位置			剖面号	剖面方位角(º)	剖面长度(m)	测点号	地理坐标		投影坐标		平均海平面y(m)	与起点距离x(m)		海滩坡度m	平均粒径(mm)	粒度系数(φ)				对应潮汐点位序号	年平均大潮潮差(m)	年平均潮差(m)	主波向数据					相对潮差RTR	无量纲沉降速率Ω	高潮泥沙沉降速度ωs(cm/s)	破波波高Hb(m)	深水波波高Hd(m)	年平均周期(s)
							省	市	区(县)					经度(º)	纬度(º)	X(m)	Y(m)						平均粒径(Mz)	分选系数(δ)	偏态(Sk)	峰态(Kg)				主波向度数（°）	主波向	频率	平均波高(m)	周期(s)
26	耗散型	无	无	FJ144-1	3501280272	福州市沙塔澳沙滩	福建省	福州市	平潭县	3501280272P22	51	300.17	3501280272P22-006	119.825	25.4823	2.8195e+06	482361	2.964	0	2.7735	0.0156975	0.221515	2.17452	0.792521	-0.393325	2.09371	153	5.54701	4.48526	63	ENE	0.454488	1.621	5.316	3.82042	10.9687	2.74304	1.45194	1.3305	4.82572
													3501280272P22-007	119.825	25.4824	2.81951e+06	482371	2.744	12.99
													3501280272P22-008	119.825	25.4825	2.81952e+06	482385	2.454	30.26
													3501280272P22-009	119.825	25.4826	2.81953e+06	482396	2.219	45.19
													3501280272P22-010	119.825	25.4827	2.81954e+06	482416	1.771	70.13
													3501280272P22-011	119.825	25.4828	2.81955e+06	482431	1.43	88.93
													3501280272P22-012	119.825	25.483	2.81957e+06	482445	1.074	107.14
													3501280272P22-013	119.826	25.483	2.81958e+06	482458	0.817	124.16
													3501280272P22-014	119.826	25.4831	2.81959e+06	482472	0.581	141.27
													3501280272P22-015	119.826	25.4833	2.8196e+06	482491	0.258	165.56
													3501280272P22-016	119.826	25.4834	2.81961e+06	482505	-0.032	184.35
													3501280272P22-017	119.826	25.4835	2.81963e+06	482523	-0.404	206.47
													3501280272P22-018	119.826	25.4836	2.81964e+06	482538	-0.644	226.03
													3501280272P22-019	119.826	25.4837	2.81965e+06	482550	-0.841	241.37
30	耗散型	无	有	FJ148	3501280312	福州市东沙澳沙滩	福建省	福州市	平潭县	3501280312P01	92	210.94	3501280312P01-008	119.848	25.464	2.81747e+06	484699	2.884	0	2.7735	0.0209405	0.20547	2.283	0.717	-0.394	1.725	153	5.54701	4.48526	63	ENE	0.454488	1.621	5.316	3.82042	6.07977	4.94878	1.45194	1.3305	4.82572
													3501280312P01-009	119.848	25.464	2.81747e+06	484707	2.61	7.85
													3501280312P01-010	119.848	25.464	2.81747e+06	484718	2.397	18.51
													3501280312P01-011	119.848	25.464	2.81747e+06	484725	2.232	26.02
													3501280312P01-012	119.848	25.464	2.81747e+06	484733	2.041	34.27
													3501280312P01-013	119.848	25.464	2.81747e+06	484743	1.836	43.79
													3501280312P01-014	119.848	25.464	2.81747e+06	484751	1.661	52.23
													3501280312P01-015	119.848	25.464	2.81747e+06	484760	1.469	61.14
													3501280312P01-016	119.849	25.464	2.81747e+06	484770	1.289	70.79
													3501280312P01-017	119.849	25.464	2.81747e+06	484778	1.119	78.94
													3501280312P01-018	119.849	25.464	2.81747e+06	484788	0.929	88.93
													3501280312P01-019	119.849	25.464	2.81746e+06	484799	0.676	99.52
													3501280312P01-020	119.849	25.464	2.81746e+06	484809	0.481	110.16
													3501280312P01-021	119.849	25.464	2.81746e+06	484819	0.279	119.69
													3501280312P01-022	119.849	25.464	2.81746e+06	484829	0.08	129.57
													3501280312P01-023	119.849	25.464	2.81746e+06	484838	-0.13	138.91
													3501280312P01-024	119.849	25.464	2.81746e+06	484847	-0.334	147.46
													3501280312P01-025	119.849	25.464	2.81746e+06	484850	-0.387	150.75
													3501280312P01-026	119.849	25.464	2.81746e+06	484861	-0.614	161.81
33	耗散型	无	有	FJ151	3501280342	福州市猴仔山沙滩	福建省	福州市	平潭县	3501280342P19	140	181.06	3501280342P19-018	119.815	25.4682	2.81794e+06	481419	2.908	0	2.76791	0.0308797	0.231012	2.11396	0.550851	-0.187604	1.13665	154	5.53581	4.48362	69	ENE	0.564181	1.312	4.69	4.15947	9.81202	2.91061	1.33089	1.21434	4.66016
													3501280342P19-019	119.815	25.4682	2.81794e+06	481420	2.739	1.96
													3501280342P19-020	119.815	25.4682	2.81793e+06	481422	2.653	5.12
													3501280342P19-021	119.815	25.4682	2.81793e+06	481425	2.695	9.64
													3501280342P19-022	119.815	25.4681	2.81793e+06	481428	2.72	13.38
													3501280342P19-023	119.815	25.4681	2.81792e+06	481432	2.705	19.74
													3501280342P19-024	119.815	25.4681	2.81792e+06	481437	2.589	27.1
													3501280342P19-025	119.815	25.468	2.81791e+06	481441	2.442	34.52
													3501280342P19-026	119.815	25.468	2.81791e+06	481445	2.307	39.86
													3501280342P19-027	119.816	25.4679	2.8179e+06	481448	2.147	44.74
													3501280342P19-028	119.816	25.4679	2.8179e+06	481450	1.999	48.68
													3501280342P19-029	119.816	25.4679	2.8179e+06	481453	1.867	52.23
													3501280342P19-030	119.816	25.4678	2.81789e+06	481455	1.714	56.37
													3501280342P19-031	119.816	25.4678	2.81789e+06	481458	1.55	60.72
													3501280342P19-032	119.816	25.4678	2.81789e+06	481461	1.399	64.74
													3501280342P19-033	119.816	25.4678	2.81788e+06	481463	1.26	68.32
													3501280342P19-034	119.816	25.4677	2.81788e+06	481465	1.135	71.79
													3501280342P19-035	119.816	25.4677	2.81788e+06	481468	0.995	75.49
													3501280342P19-036	119.816	25.4677	2.81788e+06	481470	0.831	79.43
													3501280342P19-037	119.816	25.4677	2.81787e+06	481473	0.652	83.58
													3501280342P19-038	119.816	25.4676	2.81787e+06	481475	0.49	87.64
													3501280342P19-039	119.816	25.4676	2.81787e+06	481478	0.306	91.66
													3501280342P19-040	119.816	25.4676	2.81786e+06	481481	0.142	95.7
													3501280342P19-041	119.816	25.4676	2.81786e+06	481483	-0.037	99.3
													3501280342P19-042	119.816	25.4675	2.81786e+06	481486	-0.289	104.46
													3501280342P19-043	119.816	25.4675	2.81785e+06	481491	-0.638	111.32
34	耗散型	无	有	FJ152	3501280352	福州市前进村沙滩	福建省	福州市	平潭县	3501280352P18	99	238.36	3501280352P18-014	119.811	25.4659	2.81768e+06	481012	2.92	0	2.76791	0.018779	0.311874	1.68096	0.721462	-0.409291	1.06057	154	5.53581	4.48362	69	ENE	0.564181	1.312	4.69	4.15947	6.56713	4.34878	1.33089	1.21434	4.66016
													3501280352P18-015	119.811	25.4659	2.81768e+06	481023	2.683	11.08
													3501280352P18-016	119.811	25.4659	2.81767e+06	481032	2.539	20.4
													3501280352P18-017	119.811	25.4659	2.81767e+06	481041	2.395	29.46
													3501280352P18-018	119.812	25.4658	2.81767e+06	481049	2.27	38.4
													3501280352P18-019	119.812	25.4658	2.81767e+06	481059	2.081	47.89
													3501280352P18-020	119.812	25.4658	2.81767e+06	481069	1.905	58.15
													3501280352P18-021	119.812	25.4658	2.81767e+06	481081	1.704	70.06
													3501280352P18-022	119.812	25.4658	2.81766e+06	481094	1.479	83.15
													3501280352P18-023	119.812	25.4658	2.81766e+06	481104	1.266	93.65
													3501280352P18-024	119.812	25.4657	2.81766e+06	481113	1.077	103.14
													3501280352P18-025	119.812	25.4657	2.81766e+06	481124	0.875	113.41
													3501280352P18-026	119.812	25.4657	2.81766e+06	481134	0.659	123.74
													3501280352P18-027	119.813	25.4657	2.81766e+06	481150	0.311	139.93
													3501280352P18-028	119.813	25.4657	2.81765e+06	481159	0.128	149.29
													3501280352P18-029	119.813	25.4657	2.81765e+06	481168	-0.058	158.53
													3501280352P18-030	119.813	25.4657	2.81765e+06	481181	-0.325	171.55
													3501280352P18-031	119.813	25.4656	2.81765e+06	481191	-0.519	181.59
35	耗散型	无	有	FJ154	3501280362	福州市坛南湾七号沙滩	福建省	福州市	平潭县	3501280362P16	141	126.29	3501280362P16-016	119.779	25.4486	2.81577e+06	477780	2.91	0	2.76775	0.0535483	0.352819	1.503	0.971	-0.439	0.818	155	5.5355	4.48692	69	ENE	0.516718	1.358	4.653	3.88312	0.831275	35.9156	1.42553	1.30725	4.77472
													3501280362P16-017	119.779	25.4486	2.81576e+06	477781	2.691	2.1
													3501280362P16-018	119.779	25.4486	2.81576e+06	477782	2.489	4.32
													3501280362P16-019	119.779	25.4485	2.81576e+06	477784	2.331	6.8
													3501280362P16-020	119.779	25.4485	2.81576e+06	477786	2.16	9.82
													3501280362P16-021	119.779	25.4485	2.81576e+06	477788	1.994	12.93
													3501280362P16-022	119.779	25.4485	2.81575e+06	477790	1.775	16.48
													3501280362P16-023	119.779	25.4485	2.81575e+06	477792	1.606	19.89
													3501280362P16-024	119.779	25.4484	2.81575e+06	477794	1.401	23.12
													3501280362P16-025	119.779	25.4484	2.81575e+06	477796	1.237	26.41
													3501280362P16-026	119.779	25.4484	2.81574e+06	477798	1.076	29.65
													3501280362P16-027	119.779	25.4484	2.81574e+06	477798	1.055	29.64
													3501280362P16-028	119.779	25.4484	2.81574e+06	477800	0.92	32.61
													3501280362P16-029	119.779	25.4483	2.81574e+06	477803	0.724	36.55
													3501280362P16-030	119.779	25.4483	2.81573e+06	477805	0.511	40.3
													3501280362P16-031	119.779	25.4483	2.81573e+06	477808	0.31	44.76
													3501280362P16-032	119.779	25.4482	2.81573e+06	477810	0.105	48.81
													3501280362P16-033	119.779	25.4482	2.81572e+06	477813	-0.135	53.72
													3501280362P16-034	119.779	25.4482	2.81572e+06	477816	-0.325	57.64
													3501280362P16-035	119.779	25.4482	2.81572e+06	477819	-0.548	62.04
													3501280362P16-036	119.779	25.4481	2.81571e+06	477821	-0.791	66.46
													3501280362P16-037	119.78	25.4481	2.81571e+06	477824	-0.991	70.34
													3501280362P16-038	119.78	25.4481	2.81571e+06	477827	-1.248	74.76
													3501280362P16-039	119.78	25.448	2.81571e+06	477829	-1.361	77.77
39	耗散型	无	有	FJ159	3501280412	福州市远垱澳沙滩	福建省	福州市	平潭县	3501280412P12	96	315.13	3501280412P12-020	119.752	25.4278	2.81347e+06	475013	2.83	0	2.76775	0.0177135	0.365514	1.452	0.843	0.136	0.829	155	5.5355	4.48692	69	ENE	0.516718	1.358	4.653	3.88312	9.32457	3.20183	1.42553	1.30725	4.77472
													3501280412P12-021	119.752	25.4278	2.81347e+06	475022	2.742	9.17
													3501280412P12-022	119.752	25.4278	2.81346e+06	475030	2.666	17.53
													3501280412P12-023	119.752	25.4278	2.81346e+06	475038	2.585	25
													3501280412P12-024	119.752	25.4278	2.81346e+06	475047	2.472	33.99
													3501280412P12-025	119.752	25.4278	2.81346e+06	475055	2.363	42.1
													3501280412P12-026	119.752	25.4277	2.81346e+06	475064	2.26	51.33
													3501280412P12-027	119.752	25.4277	2.81346e+06	475072	2.144	59.51
													3501280412P12-028	119.752	25.4277	2.81346e+06	475080	2.024	67.75
													3501280412P12-029	119.752	25.4277	2.81346e+06	475090	1.912	77.22
													3501280412P12-030	119.752	25.4277	2.81346e+06	475100	1.767	87.51
													3501280412P12-031	119.753	25.4277	2.81346e+06	475108	1.662	95.98
													3501280412P12-032	119.753	25.4277	2.81346e+06	475117	1.513	104.5
													3501280412P12-033	119.753	25.4277	2.81345e+06	475125	1.377	112.29
													3501280412P12-034	119.753	25.4277	2.81345e+06	475133	1.246	120.16
													3501280412P12-035	119.753	25.4277	2.81345e+06	475141	1.067	128.96
													3501280412P12-036	119.753	25.4277	2.81345e+06	475150	0.903	137.26
													3501280412P12-037	119.753	25.4277	2.81345e+06	475157	0.714	144.71
													3501280412P12-038	119.753	25.4277	2.81345e+06	475164	0.542	151.99
													3501280412P12-039	119.753	25.4276	2.81345e+06	475171	0.373	159.18
													3501280412P12-040	119.753	25.4276	2.81345e+06	475179	0.214	166.52
													3501280412P12-041	119.753	25.4276	2.81345e+06	475185	0.045	173.05
													3501280412P12-042	119.753	25.4276	2.81345e+06	475192	-0.136	179.62
													3501280412P12-043	119.753	25.4276	2.81345e+06	475197	-0.239	185.16
													3501280412P12-044	119.754	25.4276	2.81345e+06	475208	-0.473	195.81
													3501280412P12-045	119.754	25.4276	2.81344e+06	475220	-0.786	208.34
40	耗散型	无	有	FJ159	3501280412	福州市远垱澳沙滩	福建省	福州市	平潭县	3501280412P11	74	243.73	3501280412P11-013	119.753	25.4214	2.81276e+06	475107	2.788	0	2.76775	0.0186782	0.251791	1.9897	0.674556	-0.202466	1.16102	155	5.5355	4.48692	69	ENE	0.516718	1.358	4.653	3.88312	9.10619	3.27862	1.42553	1.30725	4.77472
													3501280412P11-014	119.753	25.4214	2.81276e+06	475114	2.699	7.83
													3501280412P11-015	119.753	25.4215	2.81276e+06	475124	2.572	17.6
													3501280412P11-016	119.753	25.4215	2.81277e+06	475134	2.452	28.09
													3501280412P11-017	119.753	25.4215	2.81277e+06	475143	2.308	37.64
													3501280412P11-018	119.753	25.4215	2.81277e+06	475152	2.171	47.34
													3501280412P11-019	119.753	25.4216	2.81277e+06	475160	2.036	55.49
													3501280412P11-020	119.753	25.4216	2.81278e+06	475169	1.886	64.97
													3501280412P11-021	119.753	25.4216	2.81278e+06	475178	1.739	74.35
													3501280412P11-022	119.753	25.4216	2.81278e+06	475187	1.56	83.91
													3501280412P11-023	119.753	25.4216	2.81279e+06	475197	1.352	94.06
													3501280412P11-024	119.754	25.4217	2.81279e+06	475207	1.127	104.32
													3501280412P11-025	119.754	25.4217	2.81279e+06	475215	0.971	112.36
													3501280412P11-026	119.754	25.4217	2.81279e+06	475222	0.828	119.42
													3501280412P11-027	119.754	25.4217	2.81279e+06	475230	0.644	128.28
													3501280412P11-028	119.754	25.4218	2.8128e+06	475239	0.433	137.19
													3501280412P11-029	119.754	25.4218	2.8128e+06	475247	0.255	145.7
													3501280412P11-030	119.754	25.4218	2.8128e+06	475255	0.068	154.41
													3501280412P11-031	119.754	25.4218	2.8128e+06	475263	-0.116	162.87
													3501280412P11-032	119.754	25.4218	2.81281e+06	475271	-0.263	170.53
													3501280412P11-033	119.754	25.4218	2.81281e+06	475273	-0.316	172.79
													3501280412P11-034	119.754	25.4219	2.81281e+06	475279	-0.445	178.84
													3501280412P11-035	119.754	25.4219	2.81281e+06	475292	-0.749	192.43
41	耗散型	无	有	FJ159-1	3501280422	福州市鸟仔磹沙滩	福建省	福州市	平潭县	3501280422P01	19	174.162	3501280422P01-014	119.757	25.4166	2.81222e+06	475565	2.862	-0.001	2.76775	0.0267802	0.182522	2.45385	0.394289	-0.0715219	1.01749	155	5.5355	4.48692	69	ENE	0.516718	1.358	4.653	3.88312	14.4445	2.06692	1.42553	1.30725	4.77472
													3501280422P01-015	119.757	25.4166	2.81222e+06	475566	2.685	2.866
													3501280422P01-016	119.757	25.4166	2.81223e+06	475567	2.462	5.823
													3501280422P01-017	119.757	25.4166	2.81223e+06	475568	2.261	9.109
													3501280422P01-018	119.757	25.4167	2.81223e+06	475569	2.047	12.139
													3501280422P01-019	119.757	25.4167	2.81224e+06	475570	1.875	15.856
													3501280422P01-020	119.757	25.4167	2.81224e+06	475572	1.774	20.642
													3501280422P01-021	119.757	25.4168	2.81225e+06	475574	1.649	25.322
													3501280422P01-022	119.757	25.4168	2.81225e+06	475575	1.591	28.685
													3501280422P01-023	119.757	25.4169	2.81225e+06	475577	1.429	34.59
													3501280422P01-024	119.757	25.4169	2.81226e+06	475579	1.266	41.561
													3501280422P01-025	119.757	25.417	2.81227e+06	475583	1.017	53.248
													3501280422P01-026	119.757	25.4171	2.81228e+06	475587	0.805	64.841
													3501280422P01-027	119.757	25.4172	2.81229e+06	475590	0.621	74.427
													3501280422P01-028	119.757	25.4173	2.8123e+06	475595	0.5	88.494
													3501280422P01-029	119.757	25.4174	2.81231e+06	475597	0.304	96.105
													3501280422P01-030	119.757	25.4174	2.81232e+06	475600	0.073	103.148
													3501280422P01-031	119.757	25.4175	2.81233e+06	475602	-0.191	110.081
													3501280422P01-032	119.758	25.4176	2.81233e+06	475605	-0.397	118.73
													3501280422P01-033	119.758	25.4176	2.81234e+06	475608	-0.615	126.834
													3501280422P01-034	119.758	25.4177	2.81235e+06	475612	-0.929	138.428
													3501280422P01-035	119.758	25.4178	2.81236e+06	475614	-1.13	145.322
59	耗散型	无	有	FJ180	3501280652	福州市东庠岛南模澳沙滩	福建省	福州市	平潭县	3501280652P01	176	110.42	3501280652P01-023	119.888	25.5896	2.83138e+06	488797	2.912	0	2.77495	0.0562059	0.238487	2.06802	0.75895	-0.367806	1.26471	152	5.54991	4.48337	50	NE	0.406814	1.916	4.992	3.47035	10.9084	3.0425	1.59924	1.50243	4.81859
													3501280652P01-024	119.888	25.5896	2.83137e+06	488797	2.735	2.69
													3501280652P01-025	119.888	25.5896	2.83137e+06	488797	2.515	5.68
													3501280652P01-026	119.888	25.5895	2.83137e+06	488797	2.295	8.47
													3501280652P01-027	119.888	25.5895	2.83136e+06	488798	2.097	11.51
													3501280652P01-028	119.888	25.5895	2.83136e+06	488798	1.901	14.71
													3501280652P01-029	119.888	25.5895	2.83136e+06	488798	1.717	18.61
													3501280652P01-030	119.889	25.5894	2.83135e+06	488798	1.551	21.8
													3501280652P01-031	119.889	25.5894	2.83135e+06	488799	1.346	25.44
													3501280652P01-032	119.889	25.5894	2.83135e+06	488799	1.191	28.34
													3501280652P01-033	119.889	25.5893	2.83134e+06	488799	1.015	31.76
													3501280652P01-034	119.889	25.5893	2.83134e+06	488799	0.799	35.88
													3501280652P01-035	119.889	25.5893	2.83134e+06	488800	0.548	40.24
													3501280652P01-036	119.889	25.5892	2.83133e+06	488800	0.362	43.53
													3501280652P01-037	119.889	25.5892	2.83133e+06	488800	0.136	47.42
													3501280652P01-038	119.889	25.5892	2.83132e+06	488801	-0.006	50.82
													3501280652P01-039	119.889	25.5891	2.83132e+06	488801	-0.178	53.73
													3501280652P01-040	119.889	25.5891	2.83132e+06	488801	-0.354	57.67
													3501280652P01-041	119.889	25.5891	2.83131e+06	488801	-0.607	62.15
70	耗散型	无	有	FJ198-3	3501810031	福清市北陈村沙滩	福建省	福州市	福清市	3501810031P01	48	95.56	3501810031P01-004	119.541	25.5824	2.83065e+06	453927	2.822	0.001	2.80462	0.0294835	0.786749	0.346024	1.2645	-0.0614315	0.884006	148	5.60923	4.56875	40	NE	0.480013	0.501	3.701	9.77446	1.45497	12.2246	0.573866	0.509936	3.22642
													3501810031P01-005	119.541	25.5824	2.83065e+06	453928	2.795	1.03
													3501810031P01-006	119.541	25.5824	2.83065e+06	453930	2.65	4.554
													3501810031P01-007	119.541	25.5825	2.83066e+06	453934	2.484	9.345
													3501810031P01-008	119.542	25.5825	2.83066e+06	453936	2.277	12.506
													3501810031P01-009	119.542	25.5825	2.83066e+06	453938	2.145	15
													3501810031P01-010	119.542	25.5825	2.83066e+06	453940	1.971	18.002
													3501810031P01-011	119.542	25.5826	2.83067e+06	453944	1.804	23.394
													3501810031P01-012	119.542	25.5826	2.83067e+06	453952	1.528	33.781
													3501810031P01-013	119.542	25.5827	2.83068e+06	453961	1.228	45.041
													3501810031P01-014	119.542	25.5828	2.83069e+06	453974	0.808	63.111
													3501810031P01-015	119.542	25.5828	2.8307e+06	453982	0.61	73.094
													3501810031P01-016	119.542	25.5829	2.8307e+06	453985	0.546	77.31
71	耗散型	无	有	FJ198-4	3501810041	福清市**沙滩	福建省	福州市	福清市	3501810041P01	17	73.825	3501810041P01-004	119.551	25.5819	2.8306e+06	454852	2.981	0	2.80462	0.0369989	0.439641	1.1856	1.58493	-0.793456	2.64763	148	5.60923	4.56875	40	NE	0.480013	0.501	3.701	9.77446	2.69701	6.59488	0.573866	0.509936	3.22642
													3501810041P01-005	119.551	25.582	2.8306e+06	454853	2.787	2.991
													3501810041P01-006	119.551	25.582	2.8306e+06	454853	2.576	5.461
													3501810041P01-007	119.551	25.582	2.8306e+06	454854	2.329	8.255
													3501810041P01-008	119.551	25.582	2.83061e+06	454855	2.062	11.541
													3501810041P01-009	119.551	25.5821	2.83061e+06	454856	1.723	15.315
													3501810041P01-010	119.551	25.5821	2.83062e+06	454858	1.665	20.803
													3501810041P01-011	119.551	25.5822	2.83062e+06	454860	1.565	26.507
													3501810041P01-012	119.551	25.5822	2.83063e+06	454861	1.394	32.08
													3501810041P01-013	119.551	25.5823	2.83063e+06	454863	1.093	39.41
													3501810041P01-014	119.551	25.5824	2.83065e+06	454868	0.788	53.753
													3501810041P01-015	119.551	25.5825	2.83066e+06	454871	0.524	64.155
72	耗散型	无	有	FJ199	3501810051	福清市霞湖洞沙滩	福建省	福州市	福清市	3501810051P01	26	145.2	3501810051P01-016	119.594	25.5901	2.83149e+06	459208	2.962	0	2.80462	0.0476196	0.727469	0.459043	1.61323	0.0249855	0.608188	148	5.60923	4.56875	40	NE	0.480013	0.501	3.701	9.77446	1.57197	11.3148	0.573866	0.509936	3.22642
													3501810051P01-017	119.594	25.5902	2.83149e+06	459210	2.799	3.11
													3501810051P01-018	119.594	25.5902	2.8315e+06	459211	2.638	6.53
													3501810051P01-019	119.594	25.5902	2.8315e+06	459212	2.391	9.32
													3501810051P01-020	119.594	25.5902	2.8315e+06	459213	2.302	11.65
													3501810051P01-021	119.594	25.5903	2.8315e+06	459214	2.183	14.07
													3501810051P01-022	119.594	25.5903	2.83151e+06	459216	2.064	16.38
													3501810051P01-023	119.594	25.5903	2.83151e+06	459217	1.868	19.45
													3501810051P01-024	119.594	25.5903	2.83151e+06	459218	1.712	22.2
													3501810051P01-025	119.594	25.5904	2.83151e+06	459220	1.477	26.22
													3501810051P01-026	119.594	25.5904	2.83152e+06	459222	1.222	30.3
													3501810051P01-027	119.594	25.5904	2.83152e+06	459224	1.045	34.36
													3501810051P01-028	119.594	25.5905	2.83153e+06	459226	0.784	39.63
													3501810051P01-029	119.594	25.5905	2.83153e+06	459228	0.502	45.05
													3501810051P01-030	119.594	25.5905	2.83154e+06	459230	0.35	49.63
													3501810051P01-031	119.594	25.5906	2.83154e+06	459233	0.098	55.47
													3501810051P01-032	119.594	25.5906	2.83154e+06	459235	-0.087	60.21
													3501810051P01-033	119.594	25.5907	2.83155e+06	459239	-0.465	69.26
													3501810051P01-034	119.594	25.5907	2.83156e+06	459242	-0.718	75.21
													3501810051P01-035	119.594	25.5908	2.83157e+06	459246	-1.062	84.19
73	耗散型	无	有	FJ200	3501810061	福清市后洋村沙滩	福建省	福州市	福清市	3501810061P01	14	119.69	3501810061P01-005	119.571	25.5793	2.8303e+06	456946	3.019	0	2.80462	0.0296429	1.66163	-0.732599	1.82349	0.782015	0.6249	148	5.60923	4.56875	40	NE	0.480013	0.501	3.701	9.77446	0.749451	23.7327	0.573866	0.509936	3.22642
													3501810061P01-006	119.571	25.5794	2.8303e+06	456947	2.696	5.16
													3501810061P01-007	119.572	25.5794	2.83031e+06	456949	2.337	11.02
													3501810061P01-008	119.572	25.5795	2.83032e+06	456951	1.991	18.98
													3501810061P01-009	119.572	25.5795	2.83032e+06	456953	1.719	26.12
													3501810061P01-010	119.572	25.5796	2.83033e+06	456954	1.426	33.41
													3501810061P01-011	119.572	25.5797	2.83034e+06	456957	1.088	43.07
													3501810061P01-012	119.572	25.5798	2.83035e+06	456959	0.764	52.16
													3501810061P01-013	119.572	25.5799	2.83036e+06	456963	0.357	66.88
													3501810061P01-014	119.572	25.58	2.83037e+06	456965	0.1	76.8
													3501810061P01-015	119.572	25.58	2.83038e+06	456967	-0.024	84.05
													3501810061P01-016	119.572	25.5801	2.83039e+06	456970	-0.261	94.7
													3501810061P01-017	119.572	25.5802	2.8304e+06	456973	-0.292	105.96
74	耗散型	无	有	FJ200-1	3501810071	福清市门头澳沙滩	福建省	福州市	福清市	3501810071P01	22	88.55	3501810071P01-012	119.577	25.5834	2.83075e+06	457465	2.844	0	2.80462	0.0577945	1.33454	-0.416346	1.02498	0.0198991	0.894025	148	5.60923	4.56875	40	NE	0.480013	0.501	3.701	9.77446	0.898613	19.7932	0.573866	0.509936	3.22642
													3501810071P01-013	119.577	25.5834	2.83075e+06	457466	2.616	1.69
													3501810071P01-014	119.577	25.5834	2.83075e+06	457467	2.444	3.4
													3501810071P01-015	119.577	25.5834	2.83075e+06	457468	2.188	5.95
													3501810071P01-016	119.577	25.5834	2.83075e+06	457469	1.961	8.13
													3501810071P01-017	119.577	25.5835	2.83076e+06	457470	1.672	10.79
													3501810071P01-018	119.577	25.5835	2.83076e+06	457470	1.498	12.98
													3501810071P01-019	119.577	25.5835	2.83076e+06	457471	1.25	15.88
													3501810071P01-020	119.577	25.5835	2.83076e+06	457473	1.065	19.46
													3501810071P01-021	119.577	25.5836	2.83077e+06	457474	0.848	22.84
													3501810071P01-022	119.577	25.5836	2.83077e+06	457475	0.654	25.96
													3501810071P01-023	119.577	25.5836	2.83077e+06	457476	0.48	29.22
													3501810071P01-024	119.577	25.5837	2.83078e+06	457478	0.213	33.87
													3501810071P01-025	119.577	25.5837	2.83078e+06	457480	-0.149	39.31
													3501810071P01-026	119.577	25.5838	2.83079e+06	457483	-0.538	46.35
													3501810071P01-027	119.577	25.5839	2.8308e+06	457487	-1.011	57.3
													3501810071P01-028	119.577	25.5839	2.83081e+06	457491	-1.38	68.3
													3501810071P01-029	119.577	25.584	2.83082e+06	457493	-1.603	74.69
75	耗散型	无	有	FJ201	3501810081	福清市上坤村沙滩	福建省	福州市	福清市	3501810081P01	60	136.13	3501810081P01-008	119.605	25.5516	2.82721e+06	460322	2.924	0	2.80287	0.0247014	0.711774	0.490508	1.16825	-0.524801	1.06719	149	5.60573	4.56017	21	NNE	0.398481	0.583	2.569	11.8553	1.68659	11.0703	0.472847	0.451843	2.53251
													3501810081P01-009	119.605	25.5516	2.82721e+06	460326	2.738	4.01
													3501810081P01-010	119.605	25.5516	2.82722e+06	460330	2.537	9.18
													3501810081P01-011	119.605	25.5516	2.82722e+06	460335	2.395	15.35
													3501810081P01-012	119.605	25.5517	2.82722e+06	460341	2.227	22.3
													3501810081P01-013	119.605	25.5517	2.82723e+06	460347	2.05	29.34
													3501810081P01-014	119.605	25.5517	2.82723e+06	460354	1.843	36.38
													3501810081P01-015	119.606	25.5518	2.82724e+06	460362	1.588	45.84
													3501810081P01-016	119.606	25.5518	2.82724e+06	460374	1.249	59.46
													3501810081P01-017	119.606	25.5519	2.82725e+06	460384	0.96	71.95
													3501810081P01-018	119.606	25.5519	2.82726e+06	460396	0.685	85.53
													3501810081P01-019	119.606	25.552	2.82726e+06	460411	0.363	102.23
													3501810081P01-020	119.606	25.5521	2.82727e+06	460423	-0.054	117.04
76	耗散型	无	有	FJ201-1	3501810091	福清市东沙村沙滩	福建省	福州市	福清市	3501810091P01	58	56.41	3501810091P01-006	119.609	25.5451	2.8265e+06	460683	2.879	0	2.80287	0.0437199	1.02753	-0.0391812	1.00195	-0.0267109	0.968277	149	5.60573	4.56017	21	NNE	0.398481	0.583	2.569	11.8553	1.1873	15.7257	0.472847	0.451843	2.53251
													3501810091P01-007	119.609	25.5451	2.8265e+06	460684	2.771	1.75
													3501810091P01-008	119.609	25.5451	2.8265e+06	460685	2.659	3.3
													3501810091P01-009	119.609	25.5451	2.8265e+06	460687	2.548	5.31
													3501810091P01-010	119.609	25.5451	2.8265e+06	460689	2.398	7.49
													3501810091P01-011	119.609	25.5451	2.8265e+06	460691	2.259	9.61
													3501810091P01-012	119.609	25.5452	2.8265e+06	460695	2.022	14.12
													3501810091P01-013	119.609	25.5452	2.8265e+06	460697	1.902	16.75
													3501810091P01-014	119.609	25.5452	2.82651e+06	460701	1.647	21.28
													3501810091P01-015	119.609	25.5452	2.82651e+06	460707	1.361	29.15
													3501810091P01-016	119.609	25.5453	2.82652e+06	460718	1.048	41.16
77	耗散型	无	有	FJ201-2	3501810101	福清市北楼村东沙滩	福建省	福州市	福清市	3501810101P01	57	250.89	3501810101P01-008	119.606	25.5624	2.82841e+06	460392	2.812	0.004	2.80287	0.0170251	0.47839	1.06374	1.62216	0.213646	1.27782	149	5.60573	4.56017	21	NNE	0.398481	0.583	2.569	11.8553	2.57188	7.25967	0.472847	0.451843	2.53251
													3501810101P01-009	119.606	25.5624	2.82841e+06	460394	2.628	1.346
													3501810101P01-010	119.606	25.5624	2.82841e+06	460395	2.437	2.814
													3501810101P01-011	119.606	25.5624	2.82841e+06	460396	2.244	4.495
													3501810101P01-012	119.606	25.5624	2.82841e+06	460398	1.995	6.733
													3501810101P01-013	119.606	25.5624	2.82842e+06	460401	1.71	9.799
													3501810101P01-014	119.606	25.5624	2.82842e+06	460400	1.771	8.833
													3501810101P01-015	119.606	25.5624	2.82842e+06	460402	1.57	11.54
													3501810101P01-016	119.606	25.5625	2.82842e+06	460406	1.292	15.913
													3501810101P01-017	119.606	25.5625	2.82842e+06	460410	1.067	21.184
													3501810101P01-018	119.606	25.5625	2.82843e+06	460415	0.851	26.74
													3501810101P01-019	119.606	25.5625	2.82843e+06	460418	0.685	30.528
													3501810101P01-020	119.606	25.5625	2.82843e+06	460422	0.476	35.307
													3501810101P01-021	119.606	25.5626	2.82844e+06	460432	0.09	46.227
													3501810101P01-022	119.606	25.5626	2.82844e+06	460433	0.081	48.024
													3501810101P01-023	119.606	25.5627	2.82845e+06	460447	-0.153	64.956
													3501810101P01-024	119.607	25.5628	2.82845e+06	460461	-0.218	81.014
													3501810101P01-025	119.607	25.5628	2.82846e+06	460466	-0.213	86.682
													3501810101P01-026	119.607	25.563	2.82848e+06	460500	-0.42	126.757
													3501810101P01-027	119.607	25.5631	2.82849e+06	460525	-0.64	156.156
													3501810101P01-028	119.607	25.5632	2.8285e+06	460537	-0.7	170.885
													3501810101P01-029	119.607	25.5633	2.82851e+06	460556	-0.883	192.677
													3501810101P01-030	119.608	25.5635	2.82853e+06	460590	-1.311	232.71
90	耗散型	无	有	FJ213(214)	3501810251	福清市**沙滩	福建省	福州市	福清市	3501810251P01	263	89.52	3501810251P01-007	119.591	25.3473	2.80459e+06	458845	2.837	0	2.80464	0.0610379	0.860117	0.217395	1.21595	0.0235506	1.94549	160	5.60927	4.57409	46	NE	0.272334	0.762	2.792	8.88639	1.18889	17.6552	0.63122	0.594985	3.00723
													3501810251P01-008	119.591	25.3473	2804591	458841	2.609	3.34
													3501810251P01-009	119.591	25.3473	2.80459e+06	458837	2.4	7.31
													3501810251P01-010	119.591	25.3473	2.80459e+06	458834	2.068	11.02
													3501810251P01-011	119.591	25.3473	2.80459e+06	458830	1.759	14.49
													3501810251P01-012	119.591	25.3473	2.80459e+06	458827	1.573	17.79
													3501810251P01-013	119.591	25.3473	2.80459e+06	458823	1.258	21.46
													3501810251P01-014	119.591	25.3473	2.80459e+06	458820	1.028	24.82
													3501810251P01-015	119.591	25.3473	2.80459e+06	458816	0.726	29.16
													3501810251P01-016	119.591	25.3473	2.80459e+06	458811	0.572	33.77
													3501810251P01-017	119.591	25.3473	2.80459e+06	458808	0.384	37.47
													3501810251P01-018	119.591	25.3473	2.80459e+06	458803	0.128	41.95
													3501810251P01-019	119.591	25.3473	2.80459e+06	458799	-0.114	46.29
													3501810251P01-020	119.591	25.3473	2.80459e+06	458794	-0.375	50.79
													3501810251P01-021	119.591	25.3473	2.80458e+06	458790	-0.643	55.1
													3501810251P01-022	119.591	25.3473	2.80458e+06	458788	-0.72	56.72
													3501810251P01-023	119.591	25.3472	2.80458e+06	458785	-0.907	60.07
													3501810251P01-024	119.591	25.3472	2.80458e+06	458783	-1.029	62.02
													3501810251P01-025	119.59	25.3472	2.80458e+06	458771	-1.641	74.13
													3501810251P01-026	119.59	25.3472	2.80458e+06	458769	-1.837	76.18
159	耗散型	无	有	FJ266	3503050471	莆田市紫霞洞沙滩	福建省	莆田市	秀屿区	3503050471P01	350	67.01	3503050471P01-009	119.153	25.1513	2.78309e+06	414564	2.976	0	2.79718	0.0565369	1.57829	-0.658363	1.27841	-0.708925	1.87431	168	5.59436	4.5562	90	E	0.419049	0.746	3.609	7.70836	0.841114	22.7628	0.725753	0.63095	3.7906
													3503050471P01-010	119.153	25.1514	2.78309e+06	414564	2.727	2.7
													3503050471P01-011	119.153	25.1514	2.78309e+06	414564	2.458	5.64
													3503050471P01-012	119.153	25.1514	2.78309e+06	414563	2.213	8.59
													3503050471P01-013	119.153	25.1514	2.7831e+06	414563	2.078	10.35
													3503050471P01-014	119.153	25.1514	2.7831e+06	414562	1.827	13.65
													3503050471P01-015	119.153	25.1515	2.7831e+06	414561	1.573	17.55
													3503050471P01-016	119.153	25.1515	2.78311e+06	414561	1.295	22.01
													3503050471P01-017	119.153	25.1516	2.78311e+06	414560	1.114	26.71
													3503050471P01-018	119.153	25.1516	2.78312e+06	414559	0.924	31.35
													3503050471P01-019	119.153	25.1516	2.78312e+06	414558	0.749	36.25
													3503050471P01-020	119.153	25.1517	2.78313e+06	414557	0.518	40.55
													3503050471P01-021	119.153	25.1517	2.78313e+06	414557	0.246	45.46
													3503050471P01-022	119.153	25.1518	2.78313e+06	414556	0.128	48.67
200	耗散型	无	有	FJ308	3505210151	惠安县后洋村沙滩	福建省	泉州市	惠安县	3505210151P00	47	476.57	3505210151P00-013	118.906	24.9344	2.75923e+06	389482	2.872	0	2.7362	0.0118436	0.277637	1.84873	0.595424	-0.430056	1.1828	173	5.47241	4.44759	85	E	0.446366	1.25	5.023	5.12909	6.27143	3.7386	1.06694	0.93219	4.55054
													3505210151P00-014	118.906	24.9345	2.75924e+06	389490	2.644	11.33
													3505210151P00-015	118.906	24.9346	2.75925e+06	389504	2.362	30.09
													3505210151P00-016	118.906	24.9347	2.75927e+06	389521	1.983	53.56
													3505210151P00-017	118.906	24.9349	2.75929e+06	389538	1.564	75.93
													3505210151P00-018	118.907	24.935	2.7593e+06	389553	1.148	96.21
													3505210151P00-019	118.907	24.9352	2.75932e+06	389578	0.478	130.06
													3505210151P00-020	118.907	24.9356	2.75936e+06	389618	-0.314	184.72
													3505210151P00-021	118.908	24.9358	2.75939e+06	389653	-0.998	231.69
													3505210151P00-022	118.908	24.9361	2.75942e+06	389683	-1.364	272.97
													3505210151P00-023	118.908	24.9365	2.75947e+06	389735	-1.723	342.85
													3505210151P00-024	118.909	24.937	2.75951e+06	389785	-2.216	411.63
													3505210151P00-025	118.909	24.9371	2.75953e+06	389802	-2.361	433.92
202	耗散型	无	有	FJ310	3505210171	惠安县溪底村沙滩	福建省	泉州市	惠安县	3505210171P01	61	446.24	3505210171P01-015	118.921	24.9063	2.75611e+06	390980	2.891	0	2.7362	0.0122628	0.160656	2.63796	0.701553	-0.410646	2.8667	173	5.47241	4.44759	85	E	0.446366	1.25	5.023	5.12909	13.797	1.69939	1.06694	0.93219	4.55054
													3505210171P01-016	118.921	24.9064	2.75611e+06	390992	2.585	14.23
													3505210171P01-017	118.921	24.9064	2.75612e+06	391004	2.348	27.84
													3505210171P01-018	118.921	24.9065	2.75613e+06	391017	2.158	42.2
													3505210171P01-019	118.922	24.9066	2.75614e+06	391039	1.816	67.56
													3505210171P01-020	118.922	24.9067	2.75615e+06	391065	1.416	96.78
													3505210171P01-021	118.922	24.9068	2.75616e+06	391087	1.05	121.64
													3505210171P01-022	118.922	24.9069	2.75618e+06	391110	0.691	147.66
													3505210171P01-023	118.922	24.9071	2.75619e+06	391136	0.288	177.45
													3505210171P01-024	118.923	24.9072	2.75621e+06	391165	-0.116	210.43
													3505210171P01-025	118.923	24.9073	2.75622e+06	391189	-0.524	238.12
													3505210171P01-026	118.923	24.9075	2.75623e+06	391216	-0.907	268.52
													3505210171P01-027	118.923	24.9076	2.75625e+06	391237	-1.223	291.84
													3505210171P01-028	118.924	24.9077	2.75626e+06	391262	-1.516	320.08
													3505210171P01-029	118.924	24.9078	2.75627e+06	391290	-1.75	352.19
													3505210171P01-030	118.924	24.908	2.75629e+06	391315	-2.021	380.66
													3505210171P01-031	118.924	24.908	2.7563e+06	391330	-2.165	397.9
													3505210171P01-032	118.924	24.908	2.7563e+06	391331	-2.155	398.72
													3505210171P01-033	118.924	24.9081	2.7563e+06	391337	-2.216	405.74
219	耗散型	无	有	FJ319	3505210341	惠安县玉霞村沙滩	福建省	泉州市	惠安县	3505210341P01	153	181.54	3505210341P01-013	118.783	24.861	2.7512e+06	377028	2.711	0	2.64931	0.0237591	0.291817	1.77687	0.71867	-0.622983	0.890124	175	5.29862	4.30395	96	E	0.347748	5.196	4.228	6.23418	4.34421	3.99139	0.84993	0.675955	4.90171
													3505210341P01-014	118.783	24.8609	2.7512e+06	377029	2.542	1.72
													3505210341P01-015	118.783	24.8609	2.7512e+06	377030	2.373	3.27
													3505210341P01-016	118.783	24.8609	2.7512e+06	377031	2.172	5.37
													3505210341P01-017	118.783	24.8609	2.7512e+06	377032	1.984	7.5
													3505210341P01-018	118.783	24.8609	2.75119e+06	377033	1.815	10.1
													3505210341P01-019	118.783	24.8609	2.75119e+06	377034	1.665	12.82
													3505210341P01-020	118.783	24.8609	2.75119e+06	377035	1.602	13.84
													3505210341P01-021	118.783	24.8608	2.75119e+06	377036	1.398	17.27
													3505210341P01-022	118.783	24.8608	2.75118e+06	377038	1.229	20.66
													3505210341P01-023	118.783	24.8608	2.75118e+06	377039	1.06	24.52
													3505210341P01-024	118.783	24.8607	2.75118e+06	377041	0.897	28.74
													3505210341P01-025	118.783	24.8607	2.75117e+06	377043	0.752	33.49
													3505210341P01-026	118.783	24.8607	2.75117e+06	377046	0.593	38.37
													3505210341P01-027	118.783	24.8606	2.75116e+06	377049	0.363	45.77
													3505210341P01-028	118.784	24.8605	2.75115e+06	377052	0.14	53.24
													3505210341P01-029	118.784	24.8605	2.75115e+06	377056	-0.12	61.96
													3505210341P01-030	118.784	24.8604	2.75114e+06	377061	-0.351	72.42
													3505210341P01-031	118.784	24.8602	2.75112e+06	377068	-0.56	88.94
													3505210341P01-032	118.784	24.8601	2.75111e+06	377075	-0.643	104.76
													3505210341P01-033	118.784	24.8599	2.75108e+06	377089	-0.996	135.08
													3505210341P01-034	118.784	24.8597	2.75106e+06	377098	-1.091	154.63
226	耗散型	无	有	FJ326	3505810061	石狮市后完山东南沙滩	福建省	泉州市	石狮市	3505810061P01	49	151.55	3505810061P01-008	118.733	24.6977	2.73316e+06	371729	2.816	0	2.61808	0.0309391	1.06573	-0.091839	1.33405	0.263	1.0292	176	5.23616	4.25061	75	ENE	0.341631	0.897	4.632	4.36682	1.50054	16.2538	1.19908	1.03776	4.91638
													3505810061P01-009	118.733	24.6978	2.73317e+06	371737	2.551	10.76
													3505810061P01-010	118.733	24.6978	2.73317e+06	371744	2.28	19.76
													3505810061P01-011	118.733	24.6979	2.73318e+06	371752	1.966	29.75
													3505810061P01-012	118.733	24.6979	2.73319e+06	371760	1.659	40.58
													3505810061P01-013	118.733	24.698	2.7332e+06	371770	1.255	52.63
													3505810061P01-014	118.733	24.6981	2.7332e+06	371779	0.746	64.36
													3505810061P01-015	118.733	24.6981	2.73321e+06	371786	0.298	74.4
													3505810061P01-016	118.733	24.6982	2.73322e+06	371797	-0.179	88.11
													3505810061P01-017	118.733	24.6983	2.73323e+06	371807	-0.523	101.39
													3505810061P01-018	118.733	24.6984	2.73323e+06	371816	-0.763	113.59
													3505810061P01-019	118.733	24.6984	2.73324e+06	371823	-0.882	121.72
227	耗散型	无	有	FJ326-1	3505810071	石狮市后完山南沙滩	福建省	泉州市	石狮市	3505810071P01	210	87.3	3505810071P01-007	118.732	24.6971	2.73309e+06	371635	2.719	0	2.61808	0.0521912	0.816429	0.2926	1.53151	0.162497	0.570582	176	5.23616	4.25061	75	ENE	0.341631	0.897	4.632	4.36682	1.92448	12.6733	1.19908	1.03776	4.91638
													3505810071P01-008	118.732	24.697	2.73309e+06	371632	2.294	6.21
													3505810071P01-009	118.732	24.697	2.73308e+06	371628	1.791	14.58
													3505810071P01-010	118.732	24.697	2.73308e+06	371627	1.708	16.22
													3505810071P01-011	118.731	24.6969	2.73307e+06	371623	1.291	23.75
													3505810071P01-012	118.731	24.6968	2.73307e+06	371619	0.869	32.03
													3505810071P01-013	118.731	24.6968	2.73306e+06	371614	0.406	41.21
													3505810071P01-014	118.731	24.6967	2.73305e+06	371609	-0.088	50.84
													3505810071P01-015	118.731	24.6966	2.73304e+06	371604	-0.588	61.44
													3505810071P01-016	118.731	24.6965	2.73303e+06	371600	-0.981	68.96
236	耗散型	无	有	FJ333	3505820011	晋江市深沪湾沙滩	福建省	泉州市	晋江市	3505820011P02	105	199.94	3505820011P02-017	118.645	24.6623	2.72932e+06	362829	2.631	0	2.56994	0.0166087	0.569558	0.812085	1.0908	-0.377688	1.01439	177	5.13989	4.17062	85	E	0.47611	1.307	5.508	4.6288	2.55341	8.78807	1.11041	0.939688	4.94846
													3505820011P02-018	118.645	24.6623	2.72932e+06	362830	2.424	1.45
													3505820011P02-019	118.645	24.6623	2.72932e+06	362832	2.123	3.64
													3505820011P02-020	118.645	24.6623	2.72932e+06	362835	1.813	5.93
													3505820011P02-021	118.645	24.6623	2.72932e+06	362837	1.562	8.44
													3505820011P02-022	118.645	24.6623	2.72932e+06	362839	1.288	10.77
													3505820011P02-023	118.645	24.6623	2.72932e+06	362842	1.05	13.26
													3505820011P02-024	118.645	24.6623	2.72932e+06	362844	0.855	15.6
													3505820011P02-025	118.645	24.6622	2.72932e+06	362852	0.972	23.52
													3505820011P02-026	118.645	24.6622	2.72931e+06	362873	0.77	46
													3505820011P02-027	118.646	24.6621	2.7293e+06	362903	0.612	76.21
													3505820011P02-028	118.646	24.6621	2.7293e+06	362928	0.345	103.08
													3505820011P02-029	118.646	24.662	2.72929e+06	362952	0.093	127.4
													3505820011P02-030	118.646	24.6619	2.72928e+06	362975	-0.058	150.89
237	耗散型	无	有	FJ334	3505820021	晋江市东海垵沙滩	福建省	泉州市	晋江市	3505820021P02	93	153.87	3505820021P02-012	118.669	24.5975	2.72212e+06	365239	2.601	0	2.51879	0.0272283	0.540495	0.887647	0.466176	0.119741	1.62852	178	5.03758	4.09205	72	ENE	0.593714	1.461	5.216	3.73637	3.27837	8.30223	1.34826	1.19707	4.95359
													3505820021P02-013	118.669	24.5975	2.72212e+06	365241	2.372	1.53
													3505820021P02-014	118.669	24.5975	2.72212e+06	365242	2.149	3.01
													3505820021P02-015	118.669	24.5975	2.72212e+06	365243	2.014	4.18
													3505820021P02-016	118.67	24.5975	2.72212e+06	365253	1.947	13.46
													3505820021P02-017	118.67	24.5975	2.72212e+06	365261	1.756	21.56
													3505820021P02-018	118.67	24.5974	2.72211e+06	365268	1.594	28.96
													3505820021P02-019	118.67	24.5974	2.72211e+06	365274	1.403	34.51
													3505820021P02-020	118.67	24.5974	2.72211e+06	365274	1.392	34.44
													3505820021P02-021	118.67	24.5974	2.72211e+06	365286	0.987	47.24
													3505820021P02-022	118.67	24.5974	2.72211e+06	365294	0.729	54.74
													3505820021P02-023	118.67	24.5974	2.72211e+06	365306	0.793	67.14
													3505820021P02-024	118.67	24.5974	2.72211e+06	365316	0.447	77.09
													3505820021P02-025	118.67	24.5974	2.72211e+06	365328	0.059	88.53
													3505820021P02-026	118.67	24.5974	2.72211e+06	365337	-0.212	97.97
													3505820021P02-027	118.67	24.5974	2.72211e+06	365343	-0.386	103.69
													3505820021P02-028	118.671	24.5974	2.72211e+06	365345	-0.469	105.87
270	耗散型	无	有	FJ368	3506230031	漳浦县后蔡湾沙滩	福建省	漳州市	漳浦县	3506230031P02	110	189.91	3506230031P02-013	117.984	24.1784	2.6754e+06	599942	2.309	0	2.16159	0.0207817	0.419068	1.25474	0.766411	-0.0299106	0.790179	184	4.32319	3.55828	84	E	0.452484	1.354	5.586	3.65106	3.7301	6.23836	1.18409	1.00415	5.08855
													3506230031P02-014	117.984	24.1783	2.67539e+06	599965	1.994	24.38
													3506230031P02-015	117.984	24.1783	2.67539e+06	599983	1.656	44.06
													3506230031P02-016	117.984	24.1782	2.67538e+06	599998	1.389	60.09
													3506230031P02-017	117.984	24.1782	2.67538e+06	600008	1.249	70.37
													3506230031P02-018	117.984	24.1782	2.67537e+06	600024	1.048	87.08
													3506230031P02-019	117.984	24.1781	2.67537e+06	600038	0.684	102.26
													3506230031P02-020	117.985	24.1781	2.67536e+06	600048	0.395	113.01
													3506230031P02-021	117.985	24.178	2.67536e+06	600060	0.009	125.6
													3506230031P02-022	117.985	24.178	2.67536e+06	600069	-0.271	135.38
													3506230031P02-023	117.985	24.178	2.67535e+06	600077	-0.473	143.09
273	耗散型	无	有	FJ369	3506230061	漳浦县前湖湾沙滩	福建省	漳州市	漳浦县	3506230061P02	94	138.82	3506230061P02-021	117.897	24.0849	2.66498e+06	591259	2.09	-9.9476e-14	2.07439	0.0149922	0.285071	1.81061	0.649941	-0.429938	1.26813	185	4.14878	3.4482	87	E	0.49731	1.144	5.309	3.4729	5.70661	3.87112	1.19462	0.984899	5.40771
													3506230061P02-022	117.897	24.0849	2.66498e+06	591264	1.983	4.568
													3506230061P02-023	117.898	24.0849	2.66498e+06	591275	1.877	15.328
													3506230061P02-024	117.898	24.0849	2.66498e+06	591291	1.641	32.018
													3506230061P02-025	117.898	24.0849	2.66498e+06	591308	1.419	48.429
													3506230061P02-026	117.898	24.0849	2.66498e+06	591324	1.144	64.703
													3506230061P02-027	117.898	24.0849	2.66498e+06	591332	1.005	72.652
													3506230061P02-028	117.898	24.0849	2.66498e+06	591344	0.771	85.41
275	耗散型	无	有	FJ371	3506230081	漳浦县黄金沙滩	福建省	漳州市	漳浦县	3506230081P02	99	211.83	3506230081P02-027	117.798	23.9798	2.65328e+06	581187	2.032	0	1.92192	0.0176917	0.369235	1.43739	0.77169	-0.230823	0.851827	186	3.84385	3.19483	75	ENE	0.400802	1.31	5.137	2.90854	4.85071	5.36567	1.32157	1.15318	5.07765
													3506230081P02-028	117.798	23.9798	2.65328e+06	581206	1.808	19.21
													3506230081P02-029	117.798	23.9798	2.65328e+06	581227	1.478	40.04
													3506230081P02-030	117.798	23.9797	2.65327e+06	581255	1.078	68.72
													3506230081P02-031	117.799	23.9797	2.65327e+06	581270	1.263	83.39
													3506230081P02-032	117.799	23.9797	2.65327e+06	581287	0.843	100.69
													3506230081P02-033	117.799	23.9796	2.65326e+06	581298	0.482	112.2
													3506230081P02-034	117.799	23.9796	2.65326e+06	581308	0.092	122.37
													3506230081P02-035	117.799	23.9796	2.65326e+06	581314	-0.125	128.47
276	耗散型	无	有	FJ372	3506230091	漳浦县翡翠湾沙滩	福建省	漳州市	漳浦县	3506230091P01	105	226.16	3506230091P01-019	117.773	23.9517	2.65015e+06	578706	2.385	0	1.92192	0.0135042	0.22268	2.16696	0.583378	-0.354791	2.6294	186	3.84385	3.19483	75	ENE	0.400802	1.31	5.137	2.90854	8.64094	3.01209	1.32157	1.15318	5.07765
													3506230091P01-020	117.773	23.9516	2.65014e+06	578724	1.909	18.41
													3506230091P01-021	117.774	23.9516	2.65014e+06	578737	1.799	31.88
													3506230091P01-022	117.774	23.9515	2.65014e+06	578753	1.682	48.72
													3506230091P01-023	117.774	23.9515	2.65013e+06	578769	1.484	64.91
													3506230091P01-024	117.774	23.9515	2.65013e+06	578784	1.196	81.15
													3506230091P01-025	117.774	23.9514	2.65013e+06	578795	1.012	92.52
													3506230091P01-026	117.774	23.9514	2.65012e+06	578805	0.827	102.66
													3506230091P01-027	117.774	23.9514	2.65012e+06	578811	0.709	108.41
													3506230091P01-028	117.774	23.9514	2.65012e+06	578825	0.497	122.86
													3506230091P01-029	117.775	23.9513	2.65011e+06	578841	0.265	140.15
283	耗散型	无	有	FJ380-1	3506230181	漳浦县紫竹林观音寺沙滩	福建省	漳州市	漳浦县	3506230181P02	132	135.48	3506230181P02-032	117.626	23.778	2.63084e+06	563849	1.739	-0.004	1.70015	0.0241878	0.414807	1.26949	0.675638	-0.286796	0.892863	188	3.4003	2.8555	75	ENE	0.461977	1.409	5.1	2.67377	4.1607	6.16409	1.27172	1.11218	4.95858
													3506230181P02-033	117.626	23.7779	2.63083e+06	563857	1.453	10.312
													3506230181P02-034	117.627	23.7779	2.63083e+06	563863	1.257	19.03
													3506230181P02-035	117.627	23.7778	2.63082e+06	563868	1.116	25.235
													3506230181P02-036	117.627	23.7778	2.63082e+06	563874	0.946	32.636
													3506230181P02-037	117.627	23.7777	2.63081e+06	563880	0.71	41.03
