# Supplementary material
Source: ML conference proceedings conference paper supplement (https://openreview.net/forum?id=Cug26Y0RlT)
Supplement: supplementary_material [file beachdata_single.xlsx]

## Sheet: Sheet1
Profile Azimuth	Profile Length	Longitude	Latitude	x	y	Intertidal Slope	Mean Grain Size	Mean Grain Size (Mz)	Sorting Coefficient	Skewness	Kurtosis	Corresponding Tidal Station Index	Annual Mean Spring Tidal Range	Annual Mean Tidal Range	Dominant Wave Direction	Dominant Wave Direction (Degrees)	Frequency	Mean Wave Height	Period	Relative Tidal Range	Dimensionless Settling Velocity	High Tide Sediment Settling Velocity	Breaker Wave Height Hb	Deep Water Wave Height Hd	Annual Mean Period
153	181.54	118.783	24.8609	0	2.542	0.0237591	0.562128	0.831029	0.815055	-0.189396	1.25029	175	5.29862	4.30395	E	96	0.347748	5.196	4.228	6.23418	2.00096	8.66558	0.84993	0.675955	4.90171
153	181.54	118.783	24.8609	1.55	2.373	0.0237591	0.562128	0.831029	0.815055	-0.189396	1.25029	175	5.29862	4.30395	E	96	0.347748	5.196	4.228	6.23418	2.00096	8.66558	0.84993	0.675955	4.90171
153	181.54	118.783	24.8609	3.65	2.172	0.0237591	0.562128	0.831029	0.815055	-0.189396	1.25029	175	5.29862	4.30395	E	96	0.347748	5.196	4.228	6.23418	2.00096	8.66558	0.84993	0.675955	4.90171
153	181.54	118.783	24.8609	5.78	1.984	0.0237591	0.562128	0.831029	0.815055	-0.189396	1.25029	175	5.29862	4.30395	E	96	0.347748	5.196	4.228	6.23418	2.00096	8.66558	0.84993	0.675955	4.90171
153	181.54	118.783	24.8609	8.38	1.815	0.0237591	0.562128	0.831029	0.815055	-0.189396	1.25029	175	5.29862	4.30395	E	96	0.347748	5.196	4.228	6.23418	2.00096	8.66558	0.84993	0.675955	4.90171
153	181.54	118.783	24.8609	11.1	1.665	0.0237591	0.562128	0.831029	0.815055	-0.189396	1.25029	175	5.29862	4.30395	E	96	0.347748	5.196	4.228	6.23418	2.00096	8.66558	0.84993	0.675955	4.90171
153	181.54	118.783	24.8609	12.12	1.602	0.0237591	0.562128	0.831029	0.815055	-0.189396	1.25029	175	5.29862	4.30395	E	96	0.347748	5.196	4.228	6.23418	2.00096	8.66558	0.84993	0.675955	4.90171
153	181.54	118.783	24.8608	15.55	1.398	0.0237591	0.562128	0.831029	0.815055	-0.189396	1.25029	175	5.29862	4.30395	E	96	0.347748	5.196	4.228	6.23418	2.00096	8.66558	0.84993	0.675955	4.90171
153	181.54	118.783	24.8608	18.94	1.229	0.0237591	0.562128	0.831029	0.815055	-0.189396	1.25029	175	5.29862	4.30395	E	96	0.347748	5.196	4.228	6.23418	2.00096	8.66558	0.84993	0.675955	4.90171
153	181.54	118.783	24.8608	22.8	1.06	0.0237591	0.562128	0.831029	0.815055	-0.189396	1.25029	175	5.29862	4.30395	E	96	0.347748	5.196	4.228	6.23418	2.00096	8.66558	0.84993	0.675955	4.90171
153	181.54	118.783	24.8607	27.02	0.897	0.0237591	0.562128	0.831029	0.815055	-0.189396	1.25029	175	5.29862	4.30395	E	96	0.347748	5.196	4.228	6.23418	2.00096	8.66558	0.84993	0.675955	4.90171
153	181.54	118.783	24.8607	31.77	0.752	0.0237591	0.562128	0.831029	0.815055	-0.189396	1.25029	175	5.29862	4.30395	E	96	0.347748	5.196	4.228	6.23418	2.00096	8.66558	0.84993	0.675955	4.90171
153	181.54	118.783	24.8607	36.65	0.593	0.0237591	0.562128	0.831029	0.815055	-0.189396	1.25029	175	5.29862	4.30395	E	96	0.347748	5.196	4.228	6.23418	2.00096	8.66558	0.84993	0.675955	4.90171
153	181.54	118.783	24.8606	44.05	0.363	0.0237591	0.562128	0.831029	0.815055	-0.189396	1.25029	175	5.29862	4.30395	E	96	0.347748	5.196	4.228	6.23418	2.00096	8.66558	0.84993	0.675955	4.90171
153	181.54	118.784	24.8605	51.52	0.14	0.0237591	0.562128	0.831029	0.815055	-0.189396	1.25029	175	5.29862	4.30395	E	96	0.347748	5.196	4.228	6.23418	2.00096	8.66558	0.84993	0.675955	4.90171
153	181.54	118.784	24.8605	60.24	-0.12	0.0237591	0.562128	0.831029	0.815055	-0.189396	1.25029	175	5.29862	4.30395	E	96	0.347748	5.196	4.228	6.23418	2.00096	8.66558	0.84993	0.675955	4.90171
153	181.54	118.784	24.8604	70.7	-0.351	0.0237591	0.562128	0.831029	0.815055	-0.189396	1.25029	175	5.29862	4.30395	E	96	0.347748	5.196	4.228	6.23418	2.00096	8.66558	0.84993	0.675955	4.90171
153	181.54	118.784	24.8602	87.22	-0.56	0.0237591	0.562128	0.831029	0.815055	-0.189396	1.25029	175	5.29862	4.30395	E	96	0.347748	5.196	4.228	6.23418	2.00096	8.66558	0.84993	0.675955	4.90171
153	181.54	118.784	24.8601	103.04	-0.643	0.0237591	0.562128	0.831029	0.815055	-0.189396	1.25029	175	5.29862	4.30395	E	96	0.347748	5.196	4.228	6.23418	2.00096	8.66558	0.84993	0.675955	4.90171
153	181.54	118.784	24.8599	133.36	-0.996	0.0237591	0.562128	0.831029	0.815055	-0.189396	1.25029	175	5.29862	4.30395	E	96	0.347748	5.196	4.228	6.23418	2.00096	8.66558	0.84993	0.675955	4.90171
153	181.54	118.784	24.8597	152.91	-1.091	0.0237591	0.562128	0.831029	0.815055	-0.189396	1.25029	175	5.29862	4.30395	E	96	0.347748	5.196	4.228	6.23418	2.00096	8.66558	0.84993	0.675955	4.90171
