# Supplementary material
Source: ML conference proceedings conference paper supplement (https://openreview.net/forum?id=Cug26Y0RlT)
Supplement: supplementary_material [file beachdata_test.xlsx]

## Sheet: Sheet1
剖面方位角(º)	剖面长度(m)	经度(º)	纬度(º)	x	y	潮间带坡度	平均粒径	平均粒径(Mz)	分选系数(δ)	偏态(Sk)	峰态(Kg)	对应潮汐点位序号	年平均大潮潮差(m)	年平均潮差(m)	主波向	主波向度数	频率	平均波高(m）	周期(s)	相对潮差RTR	无量纲沉降速率Ω	高潮泥沙沉降速度ωs(cm/s)	破波波高Hb(m)	深水波波高Hd(m)	年平均周期(s)
93	52.303	119.651	25.402	0	2.508	0.104967	1.28086	-0.357117	0.93653	-0.0774765	0.785472	150	5.58365	4.53694	ENE	68	0.1946	0.715	3.028	9.36958	0.996708	19.111	0.595935	0.54286	3.12858
93	52.303	119.651	25.402	2.9	2.133	0.104967	1.28086	-0.357117	0.93653	-0.0774765	0.785472	150	5.58365	4.53694	ENE	68	0.1946	0.715	3.028	9.36958	0.996708	19.111	0.595935	0.54286	3.12858
93	52.303	119.651	25.402	5.59	1.835	0.104967	1.28086	-0.357117	0.93653	-0.0774765	0.785472	150	5.58365	4.53694	ENE	68	0.1946	0.715	3.028	9.36958	0.996708	19.111	0.595935	0.54286	3.12858
93	52.303	119.651	25.402	8.48	1.514	0.104967	1.28086	-0.357117	0.93653	-0.0774765	0.785472	150	5.58365	4.53694	ENE	68	0.1946	0.715	3.028	9.36958	0.996708	19.111	0.595935	0.54286	3.12858
93	52.303	119.651	25.402	10.96	1.161	0.104967	1.28086	-0.357117	0.93653	-0.0774765	0.785472	150	5.58365	4.53694	ENE	68	0.1946	0.715	3.028	9.36958	0.996708	19.111	0.595935	0.54286	3.12858
93	52.303	119.651	25.402	13.99	0.765	0.104967	1.28086	-0.357117	0.93653	-0.0774765	0.785472	150	5.58365	4.53694	ENE	68	0.1946	0.715	3.028	9.36958	0.996708	19.111	0.595935	0.54286	3.12858
93	52.303	119.651	25.402	17.42	0.394	0.104967	1.28086	-0.357117	0.93653	-0.0774765	0.785472	150	5.58365	4.53694	ENE	68	0.1946	0.715	3.028	9.36958	0.996708	19.111	0.595935	0.54286	3.12858
93	52.303	119.651	25.402	20.9	0.016	0.104967	1.28086	-0.357117	0.93653	-0.0774765	0.785472	150	5.58365	4.53694	ENE	68	0.1946	0.715	3.028	9.36958	0.996708	19.111	0.595935	0.54286	3.12858
93	52.303	119.651	25.402	24.05	-0.309	0.104967	1.28086	-0.357117	0.93653	-0.0774765	0.785472	150	5.58365	4.53694	ENE	68	0.1946	0.715	3.028	9.36958	0.996708	19.111	0.595935	0.54286	3.12858
93	52.303	119.651	25.402	27.38	-0.603	0.104967	1.28086	-0.357117	0.93653	-0.0774765	0.785472	150	5.58365	4.53694	ENE	68	0.1946	0.715	3.028	9.36958	0.996708	19.111	0.595935	0.54286	3.12858
93	52.303	119.651	25.402	30.93	-0.827	0.104967	1.28086	-0.357117	0.93653	-0.0774765	0.785472	150	5.58365	4.53694	ENE	68	0.1946	0.715	3.028	9.36958	0.996708	19.111	0.595935	0.54286	3.12858
93	52.303	119.651	25.402	33.98	-1.104	0.104967	1.28086	-0.357117	0.93653	-0.0774765	0.785472	150	5.58365	4.53694	ENE	68	0.1946	0.715	3.028	9.36958	0.996708	19.111	0.595935	0.54286	3.12858
93	52.303	119.651	25.402	36.01	-1.273	0.104967	1.28086	-0.357117	0.93653	-0.0774765	0.785472	150	5.58365	4.53694	ENE	68	0.1946	0.715	3.028	9.36958	0.996708	19.111	0.595935	0.54286	3.12858
93	52.303	119.651	25.402	36.61	-1.356	0.104967	1.28086	-0.357117	0.93653	-0.0774765	0.785472	150	5.58365	4.53694	ENE	68	0.1946	0.715	3.028	9.36958	0.996708	19.111	0.595935	0.54286	3.12858
93	52.303	119.651	25.402	37.65	-1.444	0.104967	1.28086	-0.357117	0.93653	-0.0774765	0.785472	150	5.58365	4.53694	ENE	68	0.1946	0.715	3.028	9.36958	0.996708	19.111	0.595935	0.54286	3.12858
180	118.32	119.622	25.3437	0	2.656	0.095514	0.672616	0.572144	1.25728	-0.139286	1.33268	159	5.58313	4.54655	ENE	67	0.408712	1.066	3.55	6.0323	2.39541	10.454	0.925539	0.865943	3.69601
180	118.32	119.622	25.3437	1.67	2.423	0.095514	0.672616	0.572144	1.25728	-0.139286	1.33268	159	5.58313	4.54655	ENE	67	0.408712	1.066	3.55	6.0323	2.39541	10.454	0.925539	0.865943	3.69601
180	118.32	119.622	25.3436	3.05	2.224	0.095514	0.672616	0.572144	1.25728	-0.139286	1.33268	159	5.58313	4.54655	ENE	67	0.408712	1.066	3.55	6.0323	2.39541	10.454	0.925539	0.865943	3.69601
180	118.32	119.622	25.3436	4.57	1.996	0.095514	0.672616	0.572144	1.25728	-0.139286	1.33268	159	5.58313	4.54655	ENE	67	0.408712	1.066	3.55	6.0323	2.39541	10.454	0.925539	0.865943	3.69601
180	118.32	119.622	25.3436	6.06	1.797	0.095514	0.672616	0.572144	1.25728	-0.139286	1.33268	159	5.58313	4.54655	ENE	67	0.408712	1.066	3.55	6.0323	2.39541	10.454	0.925539	0.865943	3.69601
180	118.32	119.622	25.3436	7.43	1.572	0.095514	0.672616	0.572144	1.25728	-0.139286	1.33268	159	5.58313	4.54655	ENE	67	0.408712	1.066	3.55	6.0323	2.39541	10.454	0.925539	0.865943	3.69601
180	118.32	119.622	25.3436	9.02	1.37	0.095514	0.672616	0.572144	1.25728	-0.139286	1.33268	159	5.58313	4.54655	ENE	67	0.408712	1.066	3.55	6.0323	2.39541	10.454	0.925539	0.865943	3.69601
180	118.32	119.622	25.3436	10.55	1.155	0.095514	0.672616	0.572144	1.25728	-0.139286	1.33268	159	5.58313	4.54655	ENE	67	0.408712	1.066	3.55	6.0323	2.39541	10.454	0.925539	0.865943	3.69601
180	118.32	119.622	25.3436	12.13	0.916	0.095514	0.672616	0.572144	1.25728	-0.139286	1.33268	159	5.58313	4.54655	ENE	67	0.408712	1.066	3.55	6.0323	2.39541	10.454	0.925539	0.865943	3.69601
180	118.32	119.622	25.3435	13.95	0.666	0.095514	0.672616	0.572144	1.25728	-0.139286	1.33268	159	5.58313	4.54655	ENE	67	0.408712	1.066	3.55	6.0323	2.39541	10.454	0.925539	0.865943	3.69601
180	118.32	119.622	25.3435	15.64	0.433	0.095514	0.672616	0.572144	1.25728	-0.139286	1.33268	159	5.58313	4.54655	ENE	67	0.408712	1.066	3.55	6.0323	2.39541	10.454	0.925539	0.865943	3.69601
180	118.32	119.622	25.3435	17.43	0.191	0.095514	0.672616	0.572144	1.25728	-0.139286	1.33268	159	5.58313	4.54655	ENE	67	0.408712	1.066	3.55	6.0323	2.39541	10.454	0.925539	0.865943	3.69601
180	118.32	119.622	25.3435	19.31	-0.062	0.095514	0.672616	0.572144	1.25728	-0.139286	1.33268	159	5.58313	4.54655	ENE	67	0.408712	1.066	3.55	6.0323	2.39541	10.454	0.925539	0.865943	3.69601
180	118.32	119.622	25.3435	21.06	-0.295	0.095514	0.672616	0.572144	1.25728	-0.139286	1.33268	159	5.58313	4.54655	ENE	67	0.408712	1.066	3.55	6.0323	2.39541	10.454	0.925539	0.865943	3.69601
180	118.32	119.622	25.3435	22.98	-0.517	0.095514	0.672616	0.572144	1.25728	-0.139286	1.33268	159	5.58313	4.54655	ENE	67	0.408712	1.066	3.55	6.0323	2.39541	10.454	0.925539	0.865943	3.69601
180	118.32	119.622	25.3434	24.83	-0.754	0.095514	0.672616	0.572144	1.25728	-0.139286	1.33268	159	5.58313	4.54655	ENE	67	0.408712	1.066	3.55	6.0323	2.39541	10.454	0.925539	0.865943	3.69601
180	118.32	119.622	25.3434	27.5	-0.913	0.095514	0.672616	0.572144	1.25728	-0.139286	1.33268	159	5.58313	4.54655	ENE	67	0.408712	1.066	3.55	6.0323	2.39541	10.454	0.925539	0.865943	3.69601
180	118.32	119.622	25.3434	29.72	-1.147	0.095514	0.672616	0.572144	1.25728	-0.139286	1.33268	159	5.58313	4.54655	ENE	67	0.408712	1.066	3.55	6.0323	2.39541	10.454	0.925539	0.865943	3.69601
180	118.32	119.622	25.3434	32.22	-1.408	0.095514	0.672616	0.572144	1.25728	-0.139286	1.33268	159	5.58313	4.54655	ENE	67	0.408712	1.066	3.55	6.0323	2.39541	10.454	0.925539	0.865943	3.69601
180	118.32	119.622	25.3434	35.05	-1.737	0.095514	0.672616	0.572144	1.25728	-0.139286	1.33268	159	5.58313	4.54655	ENE	67	0.408712	1.066	3.55	6.0323	2.39541	10.454	0.925539	0.865943	3.69601
180	118.32	119.622	25.3433	36.98	-1.907	0.095514	0.672616	0.572144	1.25728	-0.139286	1.33268	159	5.58313	4.54655	ENE	67	0.408712	1.066	3.55	6.0323	2.39541	10.454	0.925539	0.865943	3.69601
180	118.32	119.622	25.3433	41.6	-2.261	0.095514	0.672616	0.572144	1.25728	-0.139286	1.33268	159	5.58313	4.54655	ENE	67	0.408712	1.066	3.55	6.0323	2.39541	10.454	0.925539	0.865943	3.69601
180	118.32	119.622	25.3432	48.55	-2.317	0.095514	0.672616	0.572144	1.25728	-0.139286	1.33268	159	5.58313	4.54655	ENE	67	0.408712	1.066	3.55	6.0323	2.39541	10.454	0.925539	0.865943	3.69601
180	118.32	119.622	25.3432	53.5	-2.454	0.095514	0.672616	0.572144	1.25728	-0.139286	1.33268	159	5.58313	4.54655	ENE	67	0.408712	1.066	3.55	6.0323	2.39541	10.454	0.925539	0.865943	3.69601
231	95.08	119.485	25.3672	0	2.57	0.0662437	1.3719	-0.456176	1.28533	-0.454176	0.520991	160	5.60927	4.57409	NE	46	0.272334	0.762	2.792	8.88639	1.03593	20.2622	0.63122	0.594985	3.00723
231	95.08	119.485	25.3672	2.18	2.358	0.0662437	1.3719	-0.456176	1.28533	-0.454176	0.520991	160	5.60927	4.57409	NE	46	0.272334	0.762	2.792	8.88639	1.03593	20.2622	0.63122	0.594985	3.00723
231	95.08	119.485	25.3672	6.49	2.037	0.0662437	1.3719	-0.456176	1.28533	-0.454176	0.520991	160	5.60927	4.57409	NE	46	0.272334	0.762	2.792	8.88639	1.03593	20.2622	0.63122	0.594985	3.00723
231	95.08	119.485	25.3672	8.8	1.853	0.0662437	1.3719	-0.456176	1.28533	-0.454176	0.520991	160	5.60927	4.57409	NE	46	0.272334	0.762	2.792	8.88639	1.03593	20.2622	0.63122	0.594985	3.00723
231	95.08	119.485	25.367	29.59	0.201	0.0662437	1.3719	-0.456176	1.28533	-0.454176	0.520991	160	5.60927	4.57409	NE	46	0.272334	0.762	2.792	8.88639	1.03593	20.2622	0.63122	0.594985	3.00723
231	95.08	119.485	25.367	29.7	0.149	0.0662437	1.3719	-0.456176	1.28533	-0.454176	0.520991	160	5.60927	4.57409	NE	46	0.272334	0.762	2.792	8.88639	1.03593	20.2622	0.63122	0.594985	3.00723
231	95.08	119.485	25.367	30.99	0.031	0.0662437	1.3719	-0.456176	1.28533	-0.454176	0.520991	160	5.60927	4.57409	NE	46	0.272334	0.762	2.792	8.88639	1.03593	20.2622	0.63122	0.594985	3.00723
231	95.08	119.485	25.367	32.48	-0.084	0.0662437	1.3719	-0.456176	1.28533	-0.454176	0.520991	160	5.60927	4.57409	NE	46	0.272334	0.762	2.792	8.88639	1.03593	20.2622	0.63122	0.594985	3.00723
231	95.08	119.485	25.367	33.19	-0.16	0.0662437	1.3719	-0.456176	1.28533	-0.454176	0.520991	160	5.60927	4.57409	NE	46	0.272334	0.762	2.792	8.88639	1.03593	20.2622	0.63122	0.594985	3.00723
231	95.08	119.485	25.367	34.69	-0.312	0.0662437	1.3719	-0.456176	1.28533	-0.454176	0.520991	160	5.60927	4.57409	NE	46	0.272334	0.762	2.792	8.88639	1.03593	20.2622	0.63122	0.594985	3.00723
231	95.08	119.485	25.367	36.47	-0.511	0.0662437	1.3719	-0.456176	1.28533	-0.454176	0.520991	160	5.60927	4.57409	NE	46	0.272334	0.762	2.792	8.88639	1.03593	20.2622	0.63122	0.594985	3.00723
231	95.08	119.484	25.3669	52.79	-1.386	0.0662437	1.3719	-0.456176	1.28533	-0.454176	0.520991	160	5.60927	4.57409	NE	46	0.272334	0.762	2.792	8.88639	1.03593	20.2622	0.63122	0.594985	3.00723
231	95.08	119.484	25.3669	58.63	-1.529	0.0662437	1.3719	-0.456176	1.28533	-0.454176	0.520991	160	5.60927	4.57409	NE	46	0.272334	0.762	2.792	8.88639	1.03593	20.2622	0.63122	0.594985	3.00723
231	95.08	119.484	25.3668	63.84	-1.659	0.0662437	1.3719	-0.456176	1.28533	-0.454176	0.520991	160	5.60927	4.57409	NE	46	0.272334	0.762	2.792	8.88639	1.03593	20.2622	0.63122	0.594985	3.00723
35	213.94	119.306	25.3	0	2.604	0.0249608	1.11294	-0.154382	0.788715	-0.37471	0.984532	162	5.61117	4.58124	NE	44	0.317793	0.611	2.585	12.9369	0.951293	16.8984	0.433734	0.392971	2.69813
35	213.94	119.306	25.3	2.31	2.325	0.0249608	1.11294	-0.154382	0.788715	-0.37471	0.984532	162	5.61117	4.58124	NE	44	0.317793	0.611	2.585	12.9369	0.951293	16.8984	0.433734	0.392971	2.69813
35	213.94	119.306	25.3	4.44	2.108	0.0249608	1.11294	-0.154382	0.788715	-0.37471	0.984532	162	5.61117	4.58124	NE	44	0.317793	0.611	2.585	12.9369	0.951293	16.8984	0.433734	0.392971	2.69813
35	213.94	119.306	25.3	6.42	1.935	0.0249608	1.11294	-0.154382	0.788715	-0.37471	0.984532	162	5.61117	4.58124	NE	44	0.317793	0.611	2.585	12.9369	0.951293	16.8984	0.433734	0.392971	2.69813
35	213.94	119.306	25.3	9.09	1.695	0.0249608	1.11294	-0.154382	0.788715	-0.37471	0.984532	162	5.61117	4.58124	NE	44	0.317793	0.611	2.585	12.9369	0.951293	16.8984	0.433734	0.392971	2.69813
35	213.94	119.306	25.3001	11.94	1.485	0.0249608	1.11294	-0.154382	0.788715	-0.37471	0.984532	162	5.61117	4.58124	NE	44	0.317793	0.611	2.585	12.9369	0.951293	16.8984	0.433734	0.392971	2.69813
35	213.94	119.306	25.3001	15.87	1.291	0.0249608	1.11294	-0.154382	0.788715	-0.37471	0.984532	162	5.61117	4.58124	NE	44	0.317793	0.611	2.585	12.9369	0.951293	16.8984	0.433734	0.392971	2.69813
35	213.94	119.306	25.3001	20.51	1.107	0.0249608	1.11294	-0.154382	0.788715	-0.37471	0.984532	162	5.61117	4.58124	NE	44	0.317793	0.611	2.585	12.9369	0.951293	16.8984	0.433734	0.392971	2.69813
35	213.94	119.306	25.3002	25.57	1.02	0.0249608	1.11294	-0.154382	0.788715	-0.37471	0.984532	162	5.61117	4.58124	NE	44	0.317793	0.611	2.585	12.9369	0.951293	16.8984	0.433734	0.392971	2.69813
35	213.94	119.306	25.3002	31.77	0.89	0.0249608	1.11294	-0.154382	0.788715	-0.37471	0.984532	162	5.61117	4.58124	NE	44	0.317793	0.611	2.585	12.9369	0.951293	16.8984	0.433734	0.392971	2.69813
35	213.94	119.307	25.3003	39.4	0.699	0.0249608	1.11294	-0.154382	0.788715	-0.37471	0.984532	162	5.61117	4.58124	NE	44	0.317793	0.611	2.585	12.9369	0.951293	16.8984	0.433734	0.392971	2.69813
35	213.94	119.307	25.3003	48.14	0.478	0.0249608	1.11294	-0.154382	0.788715	-0.37471	0.984532	162	5.61117	4.58124	NE	44	0.317793	0.611	2.585	12.9369	0.951293	16.8984	0.433734	0.392971	2.69813
35	213.94	119.307	25.3004	57.33	0.168	0.0249608	1.11294	-0.154382	0.788715	-0.37471	0.984532	162	5.61117	4.58124	NE	44	0.317793	0.611	2.585	12.9369	0.951293	16.8984	0.433734	0.392971	2.69813
35	213.94	119.307	25.3005	66.2	-0.013	0.0249608	1.11294	-0.154382	0.788715	-0.37471	0.984532	162	5.61117	4.58124	NE	44	0.317793	0.611	2.585	12.9369	0.951293	16.8984	0.433734	0.392971	2.69813
35	213.94	119.307	25.3005	76.17	-0.166	0.0249608	1.11294	-0.154382	0.788715	-0.37471	0.984532	162	5.61117	4.58124	NE	44	0.317793	0.611	2.585	12.9369	0.951293	16.8984	0.433734	0.392971	2.69813
35	213.94	119.307	25.3006	83.15	-0.278	0.0249608	1.11294	-0.154382	0.788715	-0.37471	0.984532	162	5.61117	4.58124	NE	44	0.317793	0.611	2.585	12.9369	0.951293	16.8984	0.433734	0.392971	2.69813
35	213.94	119.307	25.3006	91.91	-0.397	0.0249608	1.11294	-0.154382	0.788715	-0.37471	0.984532	162	5.61117	4.58124	NE	44	0.317793	0.611	2.585	12.9369	0.951293	16.8984	0.433734	0.392971	2.69813
35	213.94	119.307	25.3007	99.57	-0.55	0.0249608	1.11294	-0.154382	0.788715	-0.37471	0.984532	162	5.61117	4.58124	NE	44	0.317793	0.611	2.585	12.9369	0.951293	16.8984	0.433734	0.392971	2.69813
35	213.94	119.307	25.3008	107.42	-0.724	0.0249608	1.11294	-0.154382	0.788715	-0.37471	0.984532	162	5.61117	4.58124	NE	44	0.317793	0.611	2.585	12.9369	0.951293	16.8984	0.433734	0.392971	2.69813
35	213.94	119.307	25.3008	115.26	-0.901	0.0249608	1.11294	-0.154382	0.788715	-0.37471	0.984532	162	5.61117	4.58124	NE	44	0.317793	0.611	2.585	12.9369	0.951293	16.8984	0.433734	0.392971	2.69813
35	213.94	119.307	25.3009	124.95	-1.092	0.0249608	1.11294	-0.154382	0.788715	-0.37471	0.984532	162	5.61117	4.58124	NE	44	0.317793	0.611	2.585	12.9369	0.951293	16.8984	0.433734	0.392971	2.69813
35	213.94	119.307	25.301	134.94	-1.236	0.0249608	1.11294	-0.154382	0.788715	-0.37471	0.984532	162	5.61117	4.58124	NE	44	0.317793	0.611	2.585	12.9369	0.951293	16.8984	0.433734	0.392971	2.69813
35	213.94	119.307	25.301	145.22	-1.363	0.0249608	1.11294	-0.154382	0.788715	-0.37471	0.984532	162	5.61117	4.58124	NE	44	0.317793	0.611	2.585	12.9369	0.951293	16.8984	0.433734	0.392971	2.69813
35	213.94	119.307	25.3011	154.83	-1.453	0.0249608	1.11294	-0.154382	0.788715	-0.37471	0.984532	162	5.61117	4.58124	NE	44	0.317793	0.611	2.585	12.9369	0.951293	16.8984	0.433734	0.392971	2.69813
35	213.94	119.307	25.3012	165.94	-1.538	0.0249608	1.11294	-0.154382	0.788715	-0.37471	0.984532	162	5.61117	4.58124	NE	44	0.317793	0.611	2.585	12.9369	0.951293	16.8984	0.433734	0.392971	2.69813
219	135.53	119.518	25.1711	0	2.804	0.0604062	0.255952	1.96606	1.13495	-0.504753	2.16318	166	5.59877	4.56325	ENE	68	0.263052	0.899	3.395	6.22769	7.13886	3.35251	0.899012	0.828297	3.75636
219	135.53	119.518	25.1711	1.66	2.588	0.0604062	0.255952	1.96606	1.13495	-0.504753	2.16318	166	5.59877	4.56325	ENE	68	0.263052	0.899	3.395	6.22769	7.13886	3.35251	0.899012	0.828297	3.75636
219	135.53	119.518	25.1711	3.14	2.41	0.0604062	0.255952	1.96606	1.13495	-0.504753	2.16318	166	5.59877	4.56325	ENE	68	0.263052	0.899	3.395	6.22769	7.13886	3.35251	0.899012	0.828297	3.75636
219	135.53	119.518	25.171	5.13	2.21	0.0604062	0.255952	1.96606	1.13495	-0.504753	2.16318	166	5.59877	4.56325	ENE	68	0.263052	0.899	3.395	6.22769	7.13886	3.35251	0.899012	0.828297	3.75636
219	135.53	119.518	25.171	7.6	2.07	0.0604062	0.255952	1.96606	1.13495	-0.504753	2.16318	166	5.59877	4.56325	ENE	68	0.263052	0.899	3.395	6.22769	7.13886	3.35251	0.899012	0.828297	3.75636
219	135.53	119.518	25.171	10.71	1.911	0.0604062	0.255952	1.96606	1.13495	-0.504753	2.16318	166	5.59877	4.56325	ENE	68	0.263052	0.899	3.395	6.22769	7.13886	3.35251	0.899012	0.828297	3.75636
219	135.53	119.518	25.171	12.47	1.802	0.0604062	0.255952	1.96606	1.13495	-0.504753	2.16318	166	5.59877	4.56325	ENE	68	0.263052	0.899	3.395	6.22769	7.13886	3.35251	0.899012	0.828297	3.75636
219	135.53	119.518	25.171	15.34	1.644	0.0604062	0.255952	1.96606	1.13495	-0.504753	2.16318	166	5.59877	4.56325	ENE	68	0.263052	0.899	3.395	6.22769	7.13886	3.35251	0.899012	0.828297	3.75636
219	135.53	119.518	25.171	18.7	1.473	0.0604062	0.255952	1.96606	1.13495	-0.504753	2.16318	166	5.59877	4.56325	ENE	68	0.263052	0.899	3.395	6.22769	7.13886	3.35251	0.899012	0.828297	3.75636
219	135.53	119.518	25.1709	23.21	1.216	0.0604062	0.255952	1.96606	1.13495	-0.504753	2.16318	166	5.59877	4.56325	ENE	68	0.263052	0.899	3.395	6.22769	7.13886	3.35251	0.899012	0.828297	3.75636
219	135.53	119.518	25.1709	27.38	0.989	0.0604062	0.255952	1.96606	1.13495	-0.504753	2.16318	166	5.59877	4.56325	ENE	68	0.263052	0.899	3.395	6.22769	7.13886	3.35251	0.899012	0.828297	3.75636
219	135.53	119.518	25.1709	31.24	0.796	0.0604062	0.255952	1.96606	1.13495	-0.504753	2.16318	166	5.59877	4.56325	ENE	68	0.263052	0.899	3.395	6.22769	7.13886	3.35251	0.899012	0.828297	3.75636
219	135.53	119.518	25.1708	34.62	0.637	0.0604062	0.255952	1.96606	1.13495	-0.504753	2.16318	166	5.59877	4.56325	ENE	68	0.263052	0.899	3.395	6.22769	7.13886	3.35251	0.899012	0.828297	3.75636
219	135.53	119.518	25.1708	38.65	0.42	0.0604062	0.255952	1.96606	1.13495	-0.504753	2.16318	166	5.59877	4.56325	ENE	68	0.263052	0.899	3.395	6.22769	7.13886	3.35251	0.899012	0.828297	3.75636
219	135.53	119.518	25.1708	41.85	0.276	0.0604062	0.255952	1.96606	1.13495	-0.504753	2.16318	166	5.59877	4.56325	ENE	68	0.263052	0.899	3.395	6.22769	7.13886	3.35251	0.899012	0.828297	3.75636
154	126.05	119.31	25.2418	0	2.711	0.0556451	0.351825	1.50707	0.828827	-0.0732624	0.798606	165	5.6136	4.57581	NE	48	0.326864	0.705	2.918	7.69681	4.24404	5.05821	0.729341	0.670577	3.39746
154	126.05	119.31	25.2418	1.25	2.511	0.0556451	0.351825	1.50707	0.828827	-0.0732624	0.798606	165	5.6136	4.57581	NE	48	0.326864	0.705	2.918	7.69681	4.24404	5.05821	0.729341	0.670577	3.39746
154	126.05	119.31	25.2418	2.6	2.319	0.0556451	0.351825	1.50707	0.828827	-0.0732624	0.798606	165	5.6136	4.57581	NE	48	0.326864	0.705	2.918	7.69681	4.24404	5.05821	0.729341	0.670577	3.39746
154	126.05	119.31	25.2417	3.96	2.102	0.0556451	0.351825	1.50707	0.828827	-0.0732624	0.798606	165	5.6136	4.57581	NE	48	0.326864	0.705	2.918	7.69681	4.24404	5.05821	0.729341	0.670577	3.39746
154	126.05	119.31	25.2417	5.28	1.888	0.0556451	0.351825	1.50707	0.828827	-0.0732624	0.798606	165	5.6136	4.57581	NE	48	0.326864	0.705	2.918	7.69681	4.24404	5.05821	0.729341	0.670577	3.39746
154	126.05	119.31	25.2417	6.58	1.695	0.0556451	0.351825	1.50707	0.828827	-0.0732624	0.798606	165	5.6136	4.57581	NE	48	0.326864	0.705	2.918	7.69681	4.24404	5.05821	0.729341	0.670577	3.39746
154	126.05	119.31	25.2417	7.89	1.538	0.0556451	0.351825	1.50707	0.828827	-0.0732624	0.798606	165	5.6136	4.57581	NE	48	0.326864	0.705	2.918	7.69681	4.24404	5.05821	0.729341	0.670577	3.39746
154	126.05	119.31	25.2417	9.45	1.379	0.0556451	0.351825	1.50707	0.828827	-0.0732624	0.798606	165	5.6136	4.57581	NE	48	0.326864	0.705	2.918	7.69681	4.24404	5.05821	0.729341	0.670577	3.39746
154	126.05	119.31	25.2417	11.33	1.193	0.0556451	0.351825	1.50707	0.828827	-0.0732624	0.798606	165	5.6136	4.57581	NE	48	0.326864	0.705	2.918	7.69681	4.24404	5.05821	0.729341	0.670577	3.39746
154	126.05	119.31	25.2417	12.86	1.057	0.0556451	0.351825	1.50707	0.828827	-0.0732624	0.798606	165	5.6136	4.57581	NE	48	0.326864	0.705	2.918	7.69681	4.24404	5.05821	0.729341	0.670577	3.39746
154	126.05	119.31	25.2416	15.25	0.928	0.0556451	0.351825	1.50707	0.828827	-0.0732624	0.798606	165	5.6136	4.57581	NE	48	0.326864	0.705	2.918	7.69681	4.24404	5.05821	0.729341	0.670577	3.39746
154	126.05	119.31	25.2416	18.69	0.769	0.0556451	0.351825	1.50707	0.828827	-0.0732624	0.798606	165	5.6136	4.57581	NE	48	0.326864	0.705	2.918	7.69681	4.24404	5.05821	0.729341	0.670577	3.39746
154	126.05	119.31	25.2416	21.58	0.602	0.0556451	0.351825	1.50707	0.828827	-0.0732624	0.798606	165	5.6136	4.57581	NE	48	0.326864	0.705	2.918	7.69681	4.24404	5.05821	0.729341	0.670577	3.39746
154	126.05	119.31	25.2416	27.15	0.31	0.0556451	0.351825	1.50707	0.828827	-0.0732624	0.798606	165	5.6136	4.57581	NE	48	0.326864	0.705	2.918	7.69681	4.24404	5.05821	0.729341	0.670577	3.39746
154	126.05	119.31	25.2415	31.49	0.104	0.0556451	0.351825	1.50707	0.828827	-0.0732624	0.798606	165	5.6136	4.57581	NE	48	0.326864	0.705	2.918	7.69681	4.24404	5.05821	0.729341	0.670577	3.39746
154	126.05	119.31	25.2415	36.83	-0.171	0.0556451	0.351825	1.50707	0.828827	-0.0732624	0.798606	165	5.6136	4.57581	NE	48	0.326864	0.705	2.918	7.69681	4.24404	5.05821	0.729341	0.670577	3.39746
154	126.05	119.31	25.2414	41.93	-0.388	0.0556451	0.351825	1.50707	0.828827	-0.0732624	0.798606	165	5.6136	4.57581	NE	48	0.326864	0.705	2.918	7.69681	4.24404	5.05821	0.729341	0.670577	3.39746
154	126.05	119.31	25.2414	47.3	-0.629	0.0556451	0.351825	1.50707	0.828827	-0.0732624	0.798606	165	5.6136	4.57581	NE	48	0.326864	0.705	2.918	7.69681	4.24404	5.05821	0.729341	0.670577	3.39746
154	126.05	119.31	25.2414	51.38	-0.764	0.0556451	0.351825	1.50707	0.828827	-0.0732624	0.798606	165	5.6136	4.57581	NE	48	0.326864	0.705	2.918	7.69681	4.24404	5.05821	0.729341	0.670577	3.39746
154	126.05	119.31	25.2413	55.86	-0.928	0.0556451	0.351825	1.50707	0.828827	-0.0732624	0.798606	165	5.6136	4.57581	NE	48	0.326864	0.705	2.918	7.69681	4.24404	5.05821	0.729341	0.670577	3.39746
154	126.05	119.31	25.2413	60.31	-1.091	0.0556451	0.351825	1.50707	0.828827	-0.0732624	0.798606	165	5.6136	4.57581	NE	48	0.326864	0.705	2.918	7.69681	4.24404	5.05821	0.729341	0.670577	3.39746
154	126.05	119.31	25.2413	64.48	-1.236	0.0556451	0.351825	1.50707	0.828827	-0.0732624	0.798606	165	5.6136	4.57581	NE	48	0.326864	0.705	2.918	7.69681	4.24404	5.05821	0.729341	0.670577	3.39746
154	126.05	119.31	25.2412	68.62	-1.39	0.0556451	0.351825	1.50707	0.828827	-0.0732624	0.798606	165	5.6136	4.57581	NE	48	0.326864	0.705	2.918	7.69681	4.24404	5.05821	0.729341	0.670577	3.39746
154	126.05	119.31	25.2412	72.19	-1.537	0.0556451	0.351825	1.50707	0.828827	-0.0732624	0.798606	165	5.6136	4.57581	NE	48	0.326864	0.705	2.918	7.69681	4.24404	5.05821	0.729341	0.670577	3.39746
154	126.05	119.31	25.2412	74.58	-1.604	0.0556451	0.351825	1.50707	0.828827	-0.0732624	0.798606	165	5.6136	4.57581	NE	48	0.326864	0.705	2.918	7.69681	4.24404	5.05821	0.729341	0.670577	3.39746
154	126.05	119.31	25.2411	79.91	-1.795	0.0556451	0.351825	1.50707	0.828827	-0.0732624	0.798606	165	5.6136	4.57581	NE	48	0.326864	0.705	2.918	7.69681	4.24404	5.05821	0.729341	0.670577	3.39746
154	126.05	119.311	25.2411	83.17	-1.917	0.0556451	0.351825	1.50707	0.828827	-0.0732624	0.798606	165	5.6136	4.57581	NE	48	0.326864	0.705	2.918	7.69681	4.24404	5.05821	0.729341	0.670577	3.39746
108	231.66	119.289	25.2251	0.004	2.809	0.030479	0.408481	1.29166	1.00531	-0.129059	1.00872	165	5.6136	4.57581	NE	48	0.326864	0.705	2.918	7.69681	3.54606	6.05383	0.729341	0.670577	3.39746
108	231.66	119.289	25.2251	3.274	2.333	0.030479	0.408481	1.29166	1.00531	-0.129059	1.00872	165	5.6136	4.57581	NE	48	0.326864	0.705	2.918	7.69681	3.54606	6.05383	0.729341	0.670577	3.39746
108	231.66	119.289	25.2251	6.264	1.954	0.030479	0.408481	1.29166	1.00531	-0.129059	1.00872	165	5.6136	4.57581	NE	48	0.326864	0.705	2.918	7.69681	3.54606	6.05383	0.729341	0.670577	3.39746
108	231.66	119.289	25.2251	9.154	1.631	0.030479	0.408481	1.29166	1.00531	-0.129059	1.00872	165	5.6136	4.57581	NE	48	0.326864	0.705	2.918	7.69681	3.54606	6.05383	0.729341	0.670577	3.39746
108	231.66	119.289	25.2251	12.744	1.237	0.030479	0.408481	1.29166	1.00531	-0.129059	1.00872	165	5.6136	4.57581	NE	48	0.326864	0.705	2.918	7.69681	3.54606	6.05383	0.729341	0.670577	3.39746
108	231.66	119.289	25.2251	15.294	1.148	0.030479	0.408481	1.29166	1.00531	-0.129059	1.00872	165	5.6136	4.57581	NE	48	0.326864	0.705	2.918	7.69681	3.54606	6.05383	0.729341	0.670577	3.39746
108	231.66	119.289	25.2251	22.394	1.07	0.030479	0.408481	1.29166	1.00531	-0.129059	1.00872	165	5.6136	4.57581	NE	48	0.326864	0.705	2.918	7.69681	3.54606	6.05383	0.729341	0.670577	3.39746
108	231.66	119.289	25.2251	28.584	0.936	0.030479	0.408481	1.29166	1.00531	-0.129059	1.00872	165	5.6136	4.57581	NE	48	0.326864	0.705	2.918	7.69681	3.54606	6.05383	0.729341	0.670577	3.39746
108	231.66	119.289	25.225	36.644	0.79	0.030479	0.408481	1.29166	1.00531	-0.129059	1.00872	165	5.6136	4.57581	NE	48	0.326864	0.705	2.918	7.69681	3.54606	6.05383	0.729341	0.670577	3.39746
108	231.66	119.289	25.225	44.914	0.607	0.030479	0.408481	1.29166	1.00531	-0.129059	1.00872	165	5.6136	4.57581	NE	48	0.326864	0.705	2.918	7.69681	3.54606	6.05383	0.729341	0.670577	3.39746
108	231.66	119.289	25.225	53.074	0.431	0.030479	0.408481	1.29166	1.00531	-0.129059	1.00872	165	5.6136	4.57581	NE	48	0.326864	0.705	2.918	7.69681	3.54606	6.05383	0.729341	0.670577	3.39746
108	231.66	119.289	25.225	61.554	0.269	0.030479	0.408481	1.29166	1.00531	-0.129059	1.00872	165	5.6136	4.57581	NE	48	0.326864	0.705	2.918	7.69681	3.54606	6.05383	0.729341	0.670577	3.39746
108	231.66	119.289	25.225	65.974	0.173	0.030479	0.408481	1.29166	1.00531	-0.129059	1.00872	165	5.6136	4.57581	NE	48	0.326864	0.705	2.918	7.69681	3.54606	6.05383	0.729341	0.670577	3.39746
108	231.66	119.289	25.2249	76.944	-0.08	0.030479	0.408481	1.29166	1.00531	-0.129059	1.00872	165	5.6136	4.57581	NE	48	0.326864	0.705	2.918	7.69681	3.54606	6.05383	0.729341	0.670577	3.39746
108	231.66	119.289	25.2249	86.634	-0.357	0.030479	0.408481	1.29166	1.00531	-0.129059	1.00872	165	5.6136	4.57581	NE	48	0.326864	0.705	2.918	7.69681	3.54606	6.05383	0.729341	0.670577	3.39746
108	231.66	119.289	25.2249	94.394	-0.605	0.030479	0.408481	1.29166	1.00531	-0.129059	1.00872	165	5.6136	4.57581	NE	48	0.326864	0.705	2.918	7.69681	3.54606	6.05383	0.729341	0.670577	3.39746
108	231.66	119.289	25.2249	102.964	-0.846	0.030479	0.408481	1.29166	1.00531	-0.129059	1.00872	165	5.6136	4.57581	NE	48	0.326864	0.705	2.918	7.69681	3.54606	6.05383	0.729341	0.670577	3.39746
108	231.66	119.29	25.2248	117.214	-1.215	0.030479	0.408481	1.29166	1.00531	-0.129059	1.00872	165	5.6136	4.57581	NE	48	0.326864	0.705	2.918	7.69681	3.54606	6.05383	0.729341	0.670577	3.39746
108	231.66	119.29	25.2248	128.564	-1.451	0.030479	0.408481	1.29166	1.00531	-0.129059	1.00872	165	5.6136	4.57581	NE	48	0.326864	0.705	2.918	7.69681	3.54606	6.05383	0.729341	0.670577	3.39746
108	231.66	119.29	25.2247	144.654	-1.765	0.030479	0.408481	1.29166	1.00531	-0.129059	1.00872	165	5.6136	4.57581	NE	48	0.326864	0.705	2.918	7.69681	3.54606	6.05383	0.729341	0.670577	3.39746
108	231.66	119.29	25.2247	164.124	-2.23	0.030479	0.408481	1.29166	1.00531	-0.129059	1.00872	165	5.6136	4.57581	NE	48	0.326864	0.705	2.918	7.69681	3.54606	6.05383	0.729341	0.670577	3.39746
108	231.66	119.29	25.2247	173.824	-2.496	0.030479	0.408481	1.29166	1.00531	-0.129059	1.00872	165	5.6136	4.57581	NE	48	0.326864	0.705	2.918	7.69681	3.54606	6.05383	0.729341	0.670577	3.39746
108	231.66	119.29	25.2247	176.384	-2.567	0.030479	0.408481	1.29166	1.00531	-0.129059	1.00872	165	5.6136	4.57581	NE	48	0.326864	0.705	2.918	7.69681	3.54606	6.05383	0.729341	0.670577	3.39746
83	224.6	118.907	24.9218	0	2.633	0.021472	0.310866	1.68563	0.59617	-0.215746	0.980161	173	5.47241	4.44759	E	85	0.446366	1.25	5.023	5.12909	5.41383	4.33083	1.06694	0.93219	4.55054
83	224.6	118.907	24.9218	1.88	2.356	0.021472	0.310866	1.68563	0.59617	-0.215746	0.980161	173	5.47241	4.44759	E	85	0.446366	1.25	5.023	5.12909	5.41383	4.33083	1.06694	0.93219	4.55054
83	224.6	118.907	24.9218	6.99	2.169	0.021472	0.310866	1.68563	0.59617	-0.215746	0.980161	173	5.47241	4.44759	E	85	0.446366	1.25	5.023	5.12909	5.41383	4.33083	1.06694	0.93219	4.55054
83	224.6	118.907	24.9218	13.77	2.031	0.021472	0.310866	1.68563	0.59617	-0.215746	0.980161	173	5.47241	4.44759	E	85	0.446366	1.25	5.023	5.12909	5.41383	4.33083	1.06694	0.93219	4.55054
83	224.6	118.908	24.9218	26.18	1.848	0.021472	0.310866	1.68563	0.59617	-0.215746	0.980161	173	5.47241	4.44759	E	85	0.446366	1.25	5.023	5.12909	5.41383	4.33083	1.06694	0.93219	4.55054
83	224.6	118.908	24.9218	37.45	1.612	0.021472	0.310866	1.68563	0.59617	-0.215746	0.980161	173	5.47241	4.44759	E	85	0.446366	1.25	5.023	5.12909	5.41383	4.33083	1.06694	0.93219	4.55054
83	224.6	118.908	24.9218	47.31	1.467	0.021472	0.310866	1.68563	0.59617	-0.215746	0.980161	173	5.47241	4.44759	E	85	0.446366	1.25	5.023	5.12909	5.41383	4.33083	1.06694	0.93219	4.55054
83	224.6	118.908	24.9218	57.93	1.429	0.021472	0.310866	1.68563	0.59617	-0.215746	0.980161	173	5.47241	4.44759	E	85	0.446366	1.25	5.023	5.12909	5.41383	4.33083	1.06694	0.93219	4.55054
83	224.6	118.908	24.9218	71.99	1.248	0.021472	0.310866	1.68563	0.59617	-0.215746	0.980161	173	5.47241	4.44759	E	85	0.446366	1.25	5.023	5.12909	5.41383	4.33083	1.06694	0.93219	4.55054
83	224.6	118.908	24.9218	89.81	0.955	0.021472	0.310866	1.68563	0.59617	-0.215746	0.980161	173	5.47241	4.44759	E	85	0.446366	1.25	5.023	5.12909	5.41383	4.33083	1.06694	0.93219	4.55054
83	224.6	118.908	24.9219	111.32	0.461	0.021472	0.310866	1.68563	0.59617	-0.215746	0.980161	173	5.47241	4.44759	E	85	0.446366	1.25	5.023	5.12909	5.41383	4.33083	1.06694	0.93219	4.55054
83	224.6	118.909	24.9219	130.97	-0.009	0.021472	0.310866	1.68563	0.59617	-0.215746	0.980161	173	5.47241	4.44759	E	85	0.446366	1.25	5.023	5.12909	5.41383	4.33083	1.06694	0.93219	4.55054
83	224.6	118.909	24.9219	151.91	-0.556	0.021472	0.310866	1.68563	0.59617	-0.215746	0.980161	173	5.47241	4.44759	E	85	0.446366	1.25	5.023	5.12909	5.41383	4.33083	1.06694	0.93219	4.55054
83	224.6	118.909	24.9219	167.68	-0.942	0.021472	0.310866	1.68563	0.59617	-0.215746	0.980161	173	5.47241	4.44759	E	85	0.446366	1.25	5.023	5.12909	5.41383	4.33083	1.06694	0.93219	4.55054
83	224.6	118.909	24.9219	187.64	-1.396	0.021472	0.310866	1.68563	0.59617	-0.215746	0.980161	173	5.47241	4.44759	E	85	0.446366	1.25	5.023	5.12909	5.41383	4.33083	1.06694	0.93219	4.55054
61	446.24	118.921	24.9064	0	2.585	0.0126715	0.160656	2.63796	0.701553	-0.410646	2.8667	173	5.47241	4.44759	E	85	0.446366	1.25	5.023	5.12909	13.797	1.69939	1.06694	0.93219	4.55054
61	446.24	118.921	24.9064	13.61	2.348	0.0126715	0.160656	2.63796	0.701553	-0.410646	2.8667	173	5.47241	4.44759	E	85	0.446366	1.25	5.023	5.12909	13.797	1.69939	1.06694	0.93219	4.55054
61	446.24	118.921	24.9065	27.97	2.158	0.0126715	0.160656	2.63796	0.701553	-0.410646	2.8667	173	5.47241	4.44759	E	85	0.446366	1.25	5.023	5.12909	13.797	1.69939	1.06694	0.93219	4.55054
61	446.24	118.922	24.9066	53.33	1.816	0.0126715	0.160656	2.63796	0.701553	-0.410646	2.8667	173	5.47241	4.44759	E	85	0.446366	1.25	5.023	5.12909	13.797	1.69939	1.06694	0.93219	4.55054
61	446.24	118.922	24.9067	82.55	1.416	0.0126715	0.160656	2.63796	0.701553	-0.410646	2.8667	173	5.47241	4.44759	E	85	0.446366	1.25	5.023	5.12909	13.797	1.69939	1.06694	0.93219	4.55054
61	446.24	118.922	24.9068	107.41	1.05	0.0126715	0.160656	2.63796	0.701553	-0.410646	2.8667	173	5.47241	4.44759	E	85	0.446366	1.25	5.023	5.12909	13.797	1.69939	1.06694	0.93219	4.55054
61	446.24	118.922	24.9069	133.43	0.691	0.0126715	0.160656	2.63796	0.701553	-0.410646	2.8667	173	5.47241	4.44759	E	85	0.446366	1.25	5.023	5.12909	13.797	1.69939	1.06694	0.93219	4.55054
61	446.24	118.922	24.9071	163.22	0.288	0.0126715	0.160656	2.63796	0.701553	-0.410646	2.8667	173	5.47241	4.44759	E	85	0.446366	1.25	5.023	5.12909	13.797	1.69939	1.06694	0.93219	4.55054
61	446.24	118.923	24.9072	196.2	-0.116	0.0126715	0.160656	2.63796	0.701553	-0.410646	2.8667	173	5.47241	4.44759	E	85	0.446366	1.25	5.023	5.12909	13.797	1.69939	1.06694	0.93219	4.55054
61	446.24	118.923	24.9073	223.89	-0.524	0.0126715	0.160656	2.63796	0.701553	-0.410646	2.8667	173	5.47241	4.44759	E	85	0.446366	1.25	5.023	5.12909	13.797	1.69939	1.06694	0.93219	4.55054
61	446.24	118.923	24.9075	254.29	-0.907	0.0126715	0.160656	2.63796	0.701553	-0.410646	2.8667	173	5.47241	4.44759	E	85	0.446366	1.25	5.023	5.12909	13.797	1.69939	1.06694	0.93219	4.55054
61	446.24	118.923	24.9076	277.61	-1.223	0.0126715	0.160656	2.63796	0.701553	-0.410646	2.8667	173	5.47241	4.44759	E	85	0.446366	1.25	5.023	5.12909	13.797	1.69939	1.06694	0.93219	4.55054
61	446.24	118.924	24.9077	305.85	-1.516	0.0126715	0.160656	2.63796	0.701553	-0.410646	2.8667	173	5.47241	4.44759	E	85	0.446366	1.25	5.023	5.12909	13.797	1.69939	1.06694	0.93219	4.55054
61	446.24	118.924	24.9078	337.96	-1.75	0.0126715	0.160656	2.63796	0.701553	-0.410646	2.8667	173	5.47241	4.44759	E	85	0.446366	1.25	5.023	5.12909	13.797	1.69939	1.06694	0.93219	4.55054
61	446.24	118.924	24.908	366.43	-2.021	0.0126715	0.160656	2.63796	0.701553	-0.410646	2.8667	173	5.47241	4.44759	E	85	0.446366	1.25	5.023	5.12909	13.797	1.69939	1.06694	0.93219	4.55054
61	446.24	118.924	24.908	383.67	-2.165	0.0126715	0.160656	2.63796	0.701553	-0.410646	2.8667	173	5.47241	4.44759	E	85	0.446366	1.25	5.023	5.12909	13.797	1.69939	1.06694	0.93219	4.55054
61	446.24	118.924	24.908	384.49	-2.243	0.0126715	0.160656	2.63796	0.701553	-0.410646	2.8667	173	5.47241	4.44759	E	85	0.446366	1.25	5.023	5.12909	13.797	1.69939	1.06694	0.93219	4.55054
61	446.24	118.924	24.9081	391.51	-2.376	0.0126715	0.160656	2.63796	0.701553	-0.410646	2.8667	173	5.47241	4.44759	E	85	0.446366	1.25	5.023	5.12909	13.797	1.69939	1.06694	0.93219	4.55054
42	409.26	118.926	24.9008	0	2.744	0.0127532	0.785975	0.347444	1.38056	-0.304933	0.772526	173	5.47241	4.44759	E	85	0.446366	1.25	5.023	5.12909	1.91982	12.2128	1.06694	0.93219	4.55054
42	409.26	118.926	24.9008	2.4	2.546	0.0127532	0.785975	0.347444	1.38056	-0.304933	0.772526	173	5.47241	4.44759	E	85	0.446366	1.25	5.023	5.12909	1.91982	12.2128	1.06694	0.93219	4.55054
42	409.26	118.926	24.9008	3.98	2.373	0.0127532	0.785975	0.347444	1.38056	-0.304933	0.772526	173	5.47241	4.44759	E	85	0.446366	1.25	5.023	5.12909	1.91982	12.2128	1.06694	0.93219	4.55054
42	409.26	118.926	24.9008	8.29	2.126	0.0127532	0.785975	0.347444	1.38056	-0.304933	0.772526	173	5.47241	4.44759	E	85	0.446366	1.25	5.023	5.12909	1.91982	12.2128	1.06694	0.93219	4.55054
42	409.26	118.926	24.9009	23.43	1.849	0.0127532	0.785975	0.347444	1.38056	-0.304933	0.772526	173	5.47241	4.44759	E	85	0.446366	1.25	5.023	5.12909	1.91982	12.2128	1.06694	0.93219	4.55054
42	409.26	118.926	24.9011	51.62	1.365	0.0127532	0.785975	0.347444	1.38056	-0.304933	0.772526	173	5.47241	4.44759	E	85	0.446366	1.25	5.023	5.12909	1.91982	12.2128	1.06694	0.93219	4.55054
42	409.26	118.926	24.9013	76.91	0.901	0.0127532	0.785975	0.347444	1.38056	-0.304933	0.772526	173	5.47241	4.44759	E	85	0.446366	1.25	5.023	5.12909	1.91982	12.2128	1.06694	0.93219	4.55054
42	409.26	118.927	24.9015	101.93	0.567	0.0127532	0.785975	0.347444	1.38056	-0.304933	0.772526	173	5.47241	4.44759	E	85	0.446366	1.25	5.023	5.12909	1.91982	12.2128	1.06694	0.93219	4.55054
42	409.26	118.927	24.9017	140.66	0.086	0.0127532	0.785975	0.347444	1.38056	-0.304933	0.772526	173	5.47241	4.44759	E	85	0.446366	1.25	5.023	5.12909	1.91982	12.2128	1.06694	0.93219	4.55054
42	409.26	118.927	24.902	178	-0.289	0.0127532	0.785975	0.347444	1.38056	-0.304933	0.772526	173	5.47241	4.44759	E	85	0.446366	1.25	5.023	5.12909	1.91982	12.2128	1.06694	0.93219	4.55054
42	409.26	118.927	24.9025	248.83	-1.018	0.0127532	0.785975	0.347444	1.38056	-0.304933	0.772526	173	5.47241	4.44759	E	85	0.446366	1.25	5.023	5.12909	1.91982	12.2128	1.06694	0.93219	4.55054
42	409.26	118.928	24.9027	283.92	-1.334	0.0127532	0.785975	0.347444	1.38056	-0.304933	0.772526	173	5.47241	4.44759	E	85	0.446366	1.25	5.023	5.12909	1.91982	12.2128	1.06694	0.93219	4.55054
42	409.26	118.928	24.9031	343.14	-1.798	0.0127532	0.785975	0.347444	1.38056	-0.304933	0.772526	173	5.47241	4.44759	E	85	0.446366	1.25	5.023	5.12909	1.91982	12.2128	1.06694	0.93219	4.55054
42	409.26	118.928	24.9032	360.85	-1.858	0.0127532	0.785975	0.347444	1.38056	-0.304933	0.772526	173	5.47241	4.44759	E	85	0.446366	1.25	5.023	5.12909	1.91982	12.2128	1.06694	0.93219	4.55054
155	93.06	118.931	24.8761	0	2.652	0.0779172	0.98927	0.0155638	0.444145	-0.110871	1.04234	174	5.37108	4.36204	E	91	0.552051	0.785	4.572	5.8903	1.29516	15.1887	0.911853	0.758977	4.63533
155	93.06	118.931	24.8761	1.54	2.404	0.0779172	0.98927	0.0155638	0.444145	-0.110871	1.04234	174	5.37108	4.36204	E	91	0.552051	0.785	4.572	5.8903	1.29516	15.1887	0.911853	0.758977	4.63533
155	93.06	118.931	24.8761	2.43	2.189	0.0779172	0.98927	0.0155638	0.444145	-0.110871	1.04234	174	5.37108	4.36204	E	91	0.552051	0.785	4.572	5.8903	1.29516	15.1887	0.911853	0.758977	4.63533
155	93.06	118.931	24.8761	3.72	2.013	0.0779172	0.98927	0.0155638	0.444145	-0.110871	1.04234	174	5.37108	4.36204	E	91	0.552051	0.785	4.572	5.8903	1.29516	15.1887	0.911853	0.758977	4.63533
155	93.06	118.931	24.8761	4.95	1.841	0.0779172	0.98927	0.0155638	0.444145	-0.110871	1.04234	174	5.37108	4.36204	E	91	0.552051	0.785	4.572	5.8903	1.29516	15.1887	0.911853	0.758977	4.63533
155	93.06	118.931	24.876	6.35	1.595	0.0779172	0.98927	0.0155638	0.444145	-0.110871	1.04234	174	5.37108	4.36204	E	91	0.552051	0.785	4.572	5.8903	1.29516	15.1887	0.911853	0.758977	4.63533
155	93.06	118.931	24.876	7.9	1.376	0.0779172	0.98927	0.0155638	0.444145	-0.110871	1.04234	174	5.37108	4.36204	E	91	0.552051	0.785	4.572	5.8903	1.29516	15.1887	0.911853	0.758977	4.63533
155	93.06	118.931	24.876	9.71	1.101	0.0779172	0.98927	0.0155638	0.444145	-0.110871	1.04234	174	5.37108	4.36204	E	91	0.552051	0.785	4.572	5.8903	1.29516	15.1887	0.911853	0.758977	4.63533
155	93.06	118.931	24.876	11.69	0.832	0.0779172	0.98927	0.0155638	0.444145	-0.110871	1.04234	174	5.37108	4.36204	E	91	0.552051	0.785	4.572	5.8903	1.29516	15.1887	0.911853	0.758977	4.63533
155	93.06	118.931	24.876	13.42	0.527	0.0779172	0.98927	0.0155638	0.444145	-0.110871	1.04234	174	5.37108	4.36204	E	91	0.552051	0.785	4.572	5.8903	1.29516	15.1887	0.911853	0.758977	4.63533
155	93.06	118.931	24.876	14.82	0.34	0.0779172	0.98927	0.0155638	0.444145	-0.110871	1.04234	174	5.37108	4.36204	E	91	0.552051	0.785	4.572	5.8903	1.29516	15.1887	0.911853	0.758977	4.63533
155	93.06	118.931	24.876	16.27	0.173	0.0779172	0.98927	0.0155638	0.444145	-0.110871	1.04234	174	5.37108	4.36204	E	91	0.552051	0.785	4.572	5.8903	1.29516	15.1887	0.911853	0.758977	4.63533
155	93.06	118.931	24.876	17.68	-0.028	0.0779172	0.98927	0.0155638	0.444145	-0.110871	1.04234	174	5.37108	4.36204	E	91	0.552051	0.785	4.572	5.8903	1.29516	15.1887	0.911853	0.758977	4.63533
155	93.06	118.931	24.8759	19.33	-0.229	0.0779172	0.98927	0.0155638	0.444145	-0.110871	1.04234	174	5.37108	4.36204	E	91	0.552051	0.785	4.572	5.8903	1.29516	15.1887	0.911853	0.758977	4.63533
155	93.06	118.931	24.8759	20.85	-0.413	0.0779172	0.98927	0.0155638	0.444145	-0.110871	1.04234	174	5.37108	4.36204	E	91	0.552051	0.785	4.572	5.8903	1.29516	15.1887	0.911853	0.758977	4.63533
155	93.06	118.931	24.8759	23.85	-0.774	0.0779172	0.98927	0.0155638	0.444145	-0.110871	1.04234	174	5.37108	4.36204	E	91	0.552051	0.785	4.572	5.8903	1.29516	15.1887	0.911853	0.758977	4.63533
155	93.06	118.931	24.8757	53.92	-2.243	0.0779172	0.98927	0.0155638	0.444145	-0.110871	1.04234	174	5.37108	4.36204	E	91	0.552051	0.785	4.572	5.8903	1.29516	15.1887	0.911853	0.758977	4.63533
155	93.06	118.931	24.8756	64.53	-2.376	0.0779172	0.98927	0.0155638	0.444145	-0.110871	1.04234	174	5.37108	4.36204	E	91	0.552051	0.785	4.572	5.8903	1.29516	15.1887	0.911853	0.758977	4.63533
153	181.54	118.783	24.8609	0	2.542	0.0237591	0.562128	0.831029	0.815055	-0.189396	1.25029	175	5.29862	4.30395	E	96	0.347748	5.196	4.228	6.23418	2.00096	8.66558	0.84993	0.675955	4.90171
153	181.54	118.783	24.8609	1.55	2.373	0.0237591	0.562128	0.831029	0.815055	-0.189396	1.25029	175	5.29862	4.30395	E	96	0.347748	5.196	4.228	6.23418	2.00096	8.66558	0.84993	0.675955	4.90171
153	181.54	118.783	24.8609	3.65	2.172	0.0237591	0.562128	0.831029	0.815055	-0.189396	1.25029	175	5.29862	4.30395	E	96	0.347748	5.196	4.228	6.23418	2.00096	8.66558	0.84993	0.675955	4.90171
153	181.54	118.783	24.8609	5.78	1.984	0.0237591	0.562128	0.831029	0.815055	-0.189396	1.25029	175	5.29862	4.30395	E	96	0.347748	5.196	4.228	6.23418	2.00096	8.66558	0.84993	0.675955	4.90171
153	181.54	118.783	24.8609	8.38	1.815	0.0237591	0.562128	0.831029	0.815055	-0.189396	1.25029	175	5.29862	4.30395	E	96	0.347748	5.196	4.228	6.23418	2.00096	8.66558	0.84993	0.675955	4.90171
153	181.54	118.783	24.8609	11.1	1.665	0.0237591	0.562128	0.831029	0.815055	-0.189396	1.25029	175	5.29862	4.30395	E	96	0.347748	5.196	4.228	6.23418	2.00096	8.66558	0.84993	0.675955	4.90171
153	181.54	118.783	24.8609	12.12	1.602	0.0237591	0.562128	0.831029	0.815055	-0.189396	1.25029	175	5.29862	4.30395	E	96	0.347748	5.196	4.228	6.23418	2.00096	8.66558	0.84993	0.675955	4.90171
153	181.54	118.783	24.8608	15.55	1.398	0.0237591	0.562128	0.831029	0.815055	-0.189396	1.25029	175	5.29862	4.30395	E	96	0.347748	5.196	4.228	6.23418	2.00096	8.66558	0.84993	0.675955	4.90171
153	181.54	118.783	24.8608	18.94	1.229	0.0237591	0.562128	0.831029	0.815055	-0.189396	1.25029	175	5.29862	4.30395	E	96	0.347748	5.196	4.228	6.23418	2.00096	8.66558	0.84993	0.675955	4.90171
153	181.54	118.783	24.8608	22.8	1.06	0.0237591	0.562128	0.831029	0.815055	-0.189396	1.25029	175	5.29862	4.30395	E	96	0.347748	5.196	4.228	6.23418	2.00096	8.66558	0.84993	0.675955	4.90171
153	181.54	118.783	24.8607	27.02	0.897	0.0237591	0.562128	0.831029	0.815055	-0.189396	1.25029	175	5.29862	4.30395	E	96	0.347748	5.196	4.228	6.23418	2.00096	8.66558	0.84993	0.675955	4.90171
153	181.54	118.783	24.8607	31.77	0.752	0.0237591	0.562128	0.831029	0.815055	-0.189396	1.25029	175	5.29862	4.30395	E	96	0.347748	5.196	4.228	6.23418	2.00096	8.66558	0.84993	0.675955	4.90171
153	181.54	118.783	24.8607	36.65	0.593	0.0237591	0.562128	0.831029	0.815055	-0.189396	1.25029	175	5.29862	4.30395	E	96	0.347748	5.196	4.228	6.23418	2.00096	8.66558	0.84993	0.675955	4.90171
153	181.54	118.783	24.8606	44.05	0.363	0.0237591	0.562128	0.831029	0.815055	-0.189396	1.25029	175	5.29862	4.30395	E	96	0.347748	5.196	4.228	6.23418	2.00096	8.66558	0.84993	0.675955	4.90171
153	181.54	118.784	24.8605	51.52	0.14	0.0237591	0.562128	0.831029	0.815055	-0.189396	1.25029	175	5.29862	4.30395	E	96	0.347748	5.196	4.228	6.23418	2.00096	8.66558	0.84993	0.675955	4.90171
153	181.54	118.784	24.8605	60.24	-0.12	0.0237591	0.562128	0.831029	0.815055	-0.189396	1.25029	175	5.29862	4.30395	E	96	0.347748	5.196	4.228	6.23418	2.00096	8.66558	0.84993	0.675955	4.90171
153	181.54	118.784	24.8604	70.7	-0.351	0.0237591	0.562128	0.831029	0.815055	-0.189396	1.25029	175	5.29862	4.30395	E	96	0.347748	5.196	4.228	6.23418	2.00096	8.66558	0.84993	0.675955	4.90171
153	181.54	118.784	24.8602	87.22	-0.56	0.0237591	0.562128	0.831029	0.815055	-0.189396	1.25029	175	5.29862	4.30395	E	96	0.347748	5.196	4.228	6.23418	2.00096	8.66558	0.84993	0.675955	4.90171
153	181.54	118.784	24.8601	103.04	-0.643	0.0237591	0.562128	0.831029	0.815055	-0.189396	1.25029	175	5.29862	4.30395	E	96	0.347748	5.196	4.228	6.23418	2.00096	8.66558	0.84993	0.675955	4.90171
153	181.54	118.784	24.8599	133.36	-0.996	0.0237591	0.562128	0.831029	0.815055	-0.189396	1.25029	175	5.29862	4.30395	E	96	0.347748	5.196	4.228	6.23418	2.00096	8.66558	0.84993	0.675955	4.90171
153	181.54	118.784	24.8597	152.91	-1.091	0.0237591	0.562128	0.831029	0.815055	-0.189396	1.25029	175	5.29862	4.30395	E	96	0.347748	5.196	4.228	6.23418	2.00096	8.66558	0.84993	0.675955	4.90171
105	199.94	118.645	24.6623	0	2.424	0.0166087	0.513705	0.960988	0.592114	-0.234867	0.933155	177	5.13989	4.17062	E	85	0.47611	1.307	5.508	4.6288	2.85575	7.8577	1.11041	0.939688	4.94846
105	199.94	118.645	24.6623	2.19	2.123	0.0166087	0.513705	0.960988	0.592114	-0.234867	0.933155	177	5.13989	4.17062	E	85	0.47611	1.307	5.508	4.6288	2.85575	7.8577	1.11041	0.939688	4.94846
105	199.94	118.645	24.6623	4.48	1.813	0.0166087	0.513705	0.960988	0.592114	-0.234867	0.933155	177	5.13989	4.17062	E	85	0.47611	1.307	5.508	4.6288	2.85575	7.8577	1.11041	0.939688	4.94846
105	199.94	118.645	24.6623	6.99	1.562	0.0166087	0.513705	0.960988	0.592114	-0.234867	0.933155	177	5.13989	4.17062	E	85	0.47611	1.307	5.508	4.6288	2.85575	7.8577	1.11041	0.939688	4.94846
105	199.94	118.645	24.6623	9.32	1.288	0.0166087	0.513705	0.960988	0.592114	-0.234867	0.933155	177	5.13989	4.17062	E	85	0.47611	1.307	5.508	4.6288	2.85575	7.8577	1.11041	0.939688	4.94846
105	199.94	118.645	24.6623	11.81	1.05	0.0166087	0.513705	0.960988	0.592114	-0.234867	0.933155	177	5.13989	4.17062	E	85	0.47611	1.307	5.508	4.6288	2.85575	7.8577	1.11041	0.939688	4.94846
105	199.94	118.645	24.6623	14.15	0.855	0.0166087	0.513705	0.960988	0.592114	-0.234867	0.933155	177	5.13989	4.17062	E	85	0.47611	1.307	5.508	4.6288	2.85575	7.8577	1.11041	0.939688	4.94846
105	199.94	118.645	24.6622	22.07	0.972	0.0166087	0.513705	0.960988	0.592114	-0.234867	0.933155	177	5.13989	4.17062	E	85	0.47611	1.307	5.508	4.6288	2.85575	7.8577	1.11041	0.939688	4.94846
105	199.94	118.645	24.6622	44.55	0.77	0.0166087	0.513705	0.960988	0.592114	-0.234867	0.933155	177	5.13989	4.17062	E	85	0.47611	1.307	5.508	4.6288	2.85575	7.8577	1.11041	0.939688	4.94846
105	199.94	118.646	24.6621	74.76	0.612	0.0166087	0.513705	0.960988	0.592114	-0.234867	0.933155	177	5.13989	4.17062	E	85	0.47611	1.307	5.508	4.6288	2.85575	7.8577	1.11041	0.939688	4.94846
105	199.94	118.646	24.6621	101.63	0.345	0.0166087	0.513705	0.960988	0.592114	-0.234867	0.933155	177	5.13989	4.17062	E	85	0.47611	1.307	5.508	4.6288	2.85575	7.8577	1.11041	0.939688	4.94846
105	199.94	118.646	24.662	125.95	0.093	0.0166087	0.513705	0.960988	0.592114	-0.234867	0.933155	177	5.13989	4.17062	E	85	0.47611	1.307	5.508	4.6288	2.85575	7.8577	1.11041	0.939688	4.94846
105	199.94	118.646	24.6619	149.44	-0.058	0.0166087	0.513705	0.960988	0.592114	-0.234867	0.933155	177	5.13989	4.17062	E	85	0.47611	1.307	5.508	4.6288	2.85575	7.8577	1.11041	0.939688	4.94846
228	80.6	118.571	24.5145	0	2.402	0.0609562	0.509491	0.97287	0.323835	0.143467	0.753154	179	4.90966	3.99112	E	88	0.583483	0.976	5.003	5.04372	2.62015	7.78668	0.973421	0.81176	4.77114
228	80.6	118.571	24.5145	1.95	2.207	0.0609562	0.509491	0.97287	0.323835	0.143467	0.753154	179	4.90966	3.99112	E	88	0.583483	0.976	5.003	5.04372	2.62015	7.78668	0.973421	0.81176	4.77114
228	80.6	118.571	24.5145	4.12	2.006	0.0609562	0.509491	0.97287	0.323835	0.143467	0.753154	179	4.90966	3.99112	E	88	0.583483	0.976	5.003	5.04372	2.62015	7.78668	0.973421	0.81176	4.77114
228	80.6	118.571	24.5145	5.9	1.87	0.0609562	0.509491	0.97287	0.323835	0.143467	0.753154	179	4.90966	3.99112	E	88	0.583483	0.976	5.003	5.04372	2.62015	7.78668	0.973421	0.81176	4.77114
228	80.6	118.571	24.5144	7.96	1.745	0.0609562	0.509491	0.97287	0.323835	0.143467	0.753154	179	4.90966	3.99112	E	88	0.583483	0.976	5.003	5.04372	2.62015	7.78668	0.973421	0.81176	4.77114
228	80.6	118.571	24.5144	10.3	1.541	0.0609562	0.509491	0.97287	0.323835	0.143467	0.753154	179	4.90966	3.99112	E	88	0.583483	0.976	5.003	5.04372	2.62015	7.78668	0.973421	0.81176	4.77114
228	80.6	118.571	24.5144	12.22	1.374	0.0609562	0.509491	0.97287	0.323835	0.143467	0.753154	179	4.90966	3.99112	E	88	0.583483	0.976	5.003	5.04372	2.62015	7.78668	0.973421	0.81176	4.77114
228	80.6	118.571	24.5144	14.67	1.261	0.0609562	0.509491	0.97287	0.323835	0.143467	0.753154	179	4.90966	3.99112	E	88	0.583483	0.976	5.003	5.04372	2.62015	7.78668	0.973421	0.81176	4.77114
228	80.6	118.571	24.5144	16.76	1.102	0.0609562	0.509491	0.97287	0.323835	0.143467	0.753154	179	4.90966	3.99112	E	88	0.583483	0.976	5.003	5.04372	2.62015	7.78668	0.973421	0.81176	4.77114
228	80.6	118.571	24.5144	19.68	0.913	0.0609562	0.509491	0.97287	0.323835	0.143467	0.753154	179	4.90966	3.99112	E	88	0.583483	0.976	5.003	5.04372	2.62015	7.78668	0.973421	0.81176	4.77114
228	80.6	118.571	24.5144	22.36	0.791	0.0609562	0.509491	0.97287	0.323835	0.143467	0.753154	179	4.90966	3.99112	E	88	0.583483	0.976	5.003	5.04372	2.62015	7.78668	0.973421	0.81176	4.77114
228	80.6	118.571	24.5143	25.29	0.641	0.0609562	0.509491	0.97287	0.323835	0.143467	0.753154	179	4.90966	3.99112	E	88	0.583483	0.976	5.003	5.04372	2.62015	7.78668	0.973421	0.81176	4.77114
228	80.6	118.571	24.5143	28.33	0.491	0.0609562	0.509491	0.97287	0.323835	0.143467	0.753154	179	4.90966	3.99112	E	88	0.583483	0.976	5.003	5.04372	2.62015	7.78668	0.973421	0.81176	4.77114
228	80.6	118.571	24.5143	33.05	0.237	0.0609562	0.509491	0.97287	0.323835	0.143467	0.753154	179	4.90966	3.99112	E	88	0.583483	0.976	5.003	5.04372	2.62015	7.78668	0.973421	0.81176	4.77114
228	80.6	118.571	24.5143	37.69	-0.026	0.0609562	0.509491	0.97287	0.323835	0.143467	0.753154	179	4.90966	3.99112	E	88	0.583483	0.976	5.003	5.04372	2.62015	7.78668	0.973421	0.81176	4.77114
228	80.6	118.571	24.5142	42.28	-0.289	0.0609562	0.509491	0.97287	0.323835	0.143467	0.753154	179	4.90966	3.99112	E	88	0.583483	0.976	5.003	5.04372	2.62015	7.78668	0.973421	0.81176	4.77114
228	80.6	118.571	24.5142	47.06	-0.514	0.0609562	0.509491	0.97287	0.323835	0.143467	0.753154	179	4.90966	3.99112	E	88	0.583483	0.976	5.003	5.04372	2.62015	7.78668	0.973421	0.81176	4.77114
228	80.6	118.57	24.5142	51.34	-0.779	0.0609562	0.509491	0.97287	0.323835	0.143467	0.753154	179	4.90966	3.99112	E	88	0.583483	0.976	5.003	5.04372	2.62015	7.78668	0.973421	0.81176	4.77114
228	80.6	118.57	24.5142	54.86	-0.972	0.0609562	0.509491	0.97287	0.323835	0.143467	0.753154	179	4.90966	3.99112	E	88	0.583483	0.976	5.003	5.04372	2.62015	7.78668	0.973421	0.81176	4.77114
228	80.6	118.57	24.5141	57.73	-1.117	0.0609562	0.509491	0.97287	0.323835	0.143467	0.753154	179	4.90966	3.99112	E	88	0.583483	0.976	5.003	5.04372	2.62015	7.78668	0.973421	0.81176	4.77114
