# Supplementary material
Source: ML conference proceedings conference paper supplement (https://openreview.net/forum?id=Cug26Y0RlT)
Supplement: supplementary_material [file beachdata_test.xlsx]

## Sheet: Sheet1
Profile Azimuth	Profile Length	Longitude	Latitude	x	y	Intertidal Slope	Mean Grain Size	Mean Grain Size (Mz)	Sorting Coefficient	Skewness	Kurtosis	Corresponding Tidal Station Index	Annual Mean Spring Tidal Range	Annual Mean Tidal Range	Dominant Wave Direction	Dominant Wave Direction (Degrees)	Frequency	Mean Wave Height	Period	Relative Tidal Range	Dimensionless Settling Velocity	High Tide Sediment Settling Velocity	Breaker Wave Height Hb	Deep Water Wave Height Hd	Annual Mean Period
93	52.303	119.651	25.402	0	2.508	0.104967	1.28086	-0.357117	0.93653	-0.0774765	0.785472	150	5.58365	4.53694	ENE	68	0.1946	0.715	3.028	9.36958	0.996708	19.111	0.595935	0.54286	3.12858
93	52.303	119.651	25.402	2.9	2.133	0.104967	1.28086	-0.357117	0.93653	-0.0774765	0.785472	150	5.58365	4.53694	ENE	68	0.1946	0.715	3.028	9.36958	0.996708	19.111	0.595935	0.54286	3.12858
93	52.303	119.651	25.402	5.59	1.835	0.104967	1.28086	-0.357117	0.93653	-0.0774765	0.785472	150	5.58365	4.53694	ENE	68	0.1946	0.715	3.028	9.36958	0.996708	19.111	0.595935	0.54286	3.12858
93	52.303	119.651	25.402	8.48	1.514	0.104967	1.28086	-0.357117	0.93653	-0.0774765	0.785472	150	5.58365	4.53694	ENE	68	0.1946	0.715	3.028	9.36958	0.996708	19.111	0.595935	0.54286	3.12858
93	52.303	119.651	25.402	10.96	1.161	0.104967	1.28086	-0.357117	0.93653	-0.0774765	0.785472	150	5.58365	4.53694	ENE	68	0.1946	0.715	3.028	9.36958	0.996708	19.111	0.595935	0.54286	3.12858
93	52.303	119.651	25.402	13.99	0.765	0.104967	1.28086	-0.357117	0.93653	-0.0774765	0.785472	150	5.58365	4.53694	ENE	68	0.1946	0.715	3.028	9.36958	0.996708	19.111	0.595935	0.54286	3.12858
93	52.303	119.651	25.402	17.42	0.394	0.104967	1.28086	-0.357117	0.93653	-0.0774765	0.785472	150	5.58365	4.53694	ENE	68	0.1946	0.715	3.028	9.36958	0.996708	19.111	0.595935	0.54286	3.12858
93	52.303	119.651	25.402	20.9	0.016	0.104967	1.28086	-0.357117	0.93653	-0.0774765	0.785472	150	5.58365	4.53694	ENE	68	0.1946	0.715	3.028	9.36958	0.996708	19.111	0.595935	0.54286	3.12858
93	52.303	119.651	25.402	24.05	-0.309	0.104967	1.28086	-0.357117	0.93653	-0.0774765	0.785472	150	5.58365	4.53694	ENE	68	0.1946	0.715	3.028	9.36958	0.996708	19.111	0.595935	0.54286	3.12858
93	52.303	119.651	25.402	27.38	-0.603	0.104967	1.28086	-0.357117	0.93653	-0.0774765	0.785472	150	5.58365	4.53694	ENE	68	0.1946	0.715	3.028	9.36958	0.996708	19.111	0.595935	0.54286	3.12858
93	52.303	119.651	25.402	30.93	-0.827	0.104967	1.28086	-0.357117	0.93653	-0.0774765	0.785472	150	5.58365	4.53694	ENE	68	0.1946	0.715	3.028	9.36958	0.996708	19.111	0.595935	0.54286	3.12858
93	52.303	119.651	25.402	33.98	-1.104	0.104967	1.28086	-0.357117	0.93653	-0.0774765	0.785472	150	5.58365	4.53694	ENE	68	0.1946	0.715	3.028	9.36958	0.996708	19.111	0.595935	0.54286	3.12858
93	52.303	119.651	25.402	36.01	-1.273	0.104967	1.28086	-0.357117	0.93653	-0.0774765	0.785472	150	5.58365	4.53694	ENE	68	0.1946	0.715	3.028	9.36958	0.996708	19.111	0.595935	0.54286	3.12858
93	52.303	119.651	25.402	36.61	-1.356	0.104967	1.28086	-0.357117	0.93653	-0.0774765	0.785472	150	5.58365	4.53694	ENE	68	0.1946	0.715	3.028	9.36958	0.996708	19.111	0.595935	0.54286	3.12858
93	52.303	119.651	25.402	37.65	-1.444	0.104967	1.28086	-0.357117	0.93653	-0.0774765	0.785472	150	5.58365	4.53694	ENE	68	0.1946	0.715	3.028	9.36958	0.996708	19.111	0.595935	0.54286	3.12858
180	118.32	119.622	25.3437	0	2.656	0.095514	0.672616	0.572144	1.25728	-0.139286	1.33268	159	5.58313	4.54655	ENE	67	0.408712	1.066	3.55	6.0323	2.39541	10.454	0.925539	0.865943	3.69601
180	118.32	119.622	25.3437	1.67	2.423	0.095514	0.672616	0.572144	1.25728	-0.139286	1.33268	159	5.58313	4.54655	ENE	67	0.408712	1.066	3.55	6.0323	2.39541	10.454	0.925539	0.865943	3.69601
180	118.32	119.622	25.3436	3.05	2.224	0.095514	0.672616	0.572144	1.25728	-0.139286	1.33268	159	5.58313	4.54655	ENE	67	0.408712	1.066	3.55	6.0323	2.39541	10.454	0.925539	0.865943	3.69601
180	118.32	119.622	25.3436	4.57	1.996	0.095514	0.672616	0.572144	1.25728	-0.139286	1.33268	159	5.58313	4.54655	ENE	67	0.408712	1.066	3.55	6.0323	2.39541	10.454	0.925539	0.865943	3.69601
180	118.32	119.622	25.3436	6.06	1.797	0.095514	0.672616	0.572144	1.25728	-0.139286	1.33268	159	5.58313	4.54655	ENE	67	0.408712	1.066	3.55	6.0323	2.39541	10.454	0.925539	0.865943	3.69601
180	118.32	119.622	25.3436	7.43	1.572	0.095514	0.672616	0.572144	1.25728	-0.139286	1.33268	159	5.58313	4.54655	ENE	67	0.408712	1.066	3.55	6.0323	2.39541	10.454	0.925539	0.865943	3.69601
180	118.32	119.622	25.3436	9.02	1.37	0.095514	0.672616	0.572144	1.25728	-0.139286	1.33268	159	5.58313	4.54655	ENE	67	0.408712	1.066	3.55	6.0323	2.39541	10.454	0.925539	0.865943	3.69601
180	118.32	119.622	25.3436	10.55	1.155	0.095514	0.672616	0.572144	1.25728	-0.139286	1.33268	159	5.58313	4.54655	ENE	67	0.408712	1.066	3.55	6.0323	2.39541	10.454	0.925539	0.865943	3.69601
180	118.32	119.622	25.3436	12.13	0.916	0.095514	0.672616	0.572144	1.25728	-0.139286	1.33268	159	5.58313	4.54655	ENE	67	0.408712	1.066	3.55	6.0323	2.39541	10.454	0.925539	0.865943	3.69601
180	118.32	119.622	25.3435	13.95	0.666	0.095514	0.672616	0.572144	1.25728	-0.139286	1.33268	159	5.58313	4.54655	ENE	67	0.408712	1.066	3.55	6.0323	2.39541	10.454	0.925539	0.865943	3.69601
180	118.32	119.622	25.3435	15.64	0.433	0.095514	0.672616	0.572144	1.25728	-0.139286	1.33268	159	5.58313	4.54655	ENE	67	0.408712	1.066	3.55	6.0323	2.39541	10.454	0.925539	0.865943	3.69601
180	118.32	119.622	25.3435	17.43	0.191	0.095514	0.672616	0.572144	1.25728	-0.139286	1.33268	159	5.58313	4.54655	ENE	67	0.408712	1.066	3.55	6.0323	2.39541	10.454	0.925539	0.865943	3.69601
180	118.32	119.622	25.3435	19.31	-0.062	0.095514	0.672616	0.572144	1.25728	-0.139286	1.33268	159	5.58313	4.54655	ENE	67	0.408712	1.066	3.55	6.0323	2.39541	10.454	0.925539	0.865943	3.69601
180	118.32	119.622	25.3435	21.06	-0.295	0.095514	0.672616	0.572144	1.25728	-0.139286	1.33268	159	5.58313	4.54655	ENE	67	0.408712	1.066	3.55	6.0323	2.39541	10.454	0.925539	0.865943	3.69601
180	118.32	119.622	25.3435	22.98	-0.517	0.095514	0.672616	0.572144	1.25728	-0.139286	1.33268	159	5.58313	4.54655	ENE	67	0.408712	1.066	3.55	6.0323	2.39541	10.454	0.925539	0.865943	3.69601
180	118.32	119.622	25.3434	24.83	-0.754	0.095514	0.672616	0.572144	1.25728	-0.139286	1.33268	159	5.58313	4.54655	ENE	67	0.408712	1.066	3.55	6.0323	2.39541	10.454	0.925539	0.865943	3.69601
180	118.32	119.622	25.3434	27.5	-0.913	0.095514	0.672616	0.572144	1.25728	-0.139286	1.33268	159	5.58313	4.54655	ENE	67	0.408712	1.066	3.55	6.0323	2.39541	10.454	0.925539	0.865943	3.69601
180	118.32	119.622	25.3434	29.72	-1.147	0.095514	0.672616	0.572144	1.25728	-0.139286	1.33268	159	5.58313	4.54655	ENE	67	0.408712	1.066	3.55	6.0323	2.39541	10.454	0.925539	0.865943	3.69601
180	118.32	119.622	25.3434	32.22	-1.408	0.095514	0.672616	0.572144	1.25728	-0.139286	1.33268	159	5.58313	4.54655	ENE	67	0.408712	1.066	3.55	6.0323	2.39541	10.454	0.925539	0.865943	3.69601
180	118.32	119.622	25.3434	35.05	-1.737	0.095514	0.672616	0.572144	1.25728	-0.139286	1.33268	159	5.58313	4.54655	ENE	67	0.408712	1.066	3.55	6.0323	2.39541	10.454	0.925539	0.865943	3.69601
180	118.32	119.622	25.3433	36.98	-1.907	0.095514	0.672616	0.572144	1.25728	-0.139286	1.33268	159	5.58313	4.54655	ENE	67	0.408712	1.066	3.55	6.0323	2.39541	10.454	0.925539	0.865943	3.69601
180	118.32	119.622	25.3433	41.6	-2.261	0.095514	0.672616	0.572144	1.25728	-0.139286	1.33268	159	5.58313	4.54655	ENE	67	0.408712	1.066	3.55	6.0323	2.39541	10.454	0.925539	0.865943	3.69601
180	118.32	119.622	25.3432	48.55	-2.317	0.095514	0.672616	0.572144	1.25728	-0.139286	1.33268	159	5.58313	4.54655	ENE	67	0.408712	1.066	3.55	6.0323	2.39541	10.454	0.925539	0.865943	3.69601
180	118.32	119.622	25.3432	53.5	-2.454	0.095514	0.672616	0.572144	1.25728	-0.139286	1.33268	159	5.58313	4.54655	ENE	67	0.408712	1.066	3.55	6.0323	2.39541	10.454	0.925539	0.865943	3.69601
231	95.08	119.485	25.3672	0	2.57	0.0662437	1.3719	-0.456176	1.28533	-0.454176	0.520991	160	5.60927	4.57409	NE	46	0.272334	0.762	2.792	8.88639	1.03593	20.2622	0.63122	0.594985	3.00723
231	95.08	119.485	25.3672	2.18	2.358	0.0662437	1.3719	-0.456176	1.28533	-0.454176	0.520991	160	5.60927	4.57409	NE	46	0.272334	0.762	2.792	8.88639	1.03593	20.2622	0.63122	0.594985	3.00723
231	95.08	119.485	25.3672	6.49	2.037	0.0662437	1.3719	-0.456176	1.28533	-0.454176	0.520991	160	5.60927	4.57409	NE	46	0.272334	0.762	2.792	8.88639	1.03593	20.2622	0.63122	0.594985	3.00723
231	95.08	119.485	25.3672	8.8	1.853	0.0662437	1.3719	-0.456176	1.28533	-0.454176	0.520991	160	5.60927	4.57409	NE	46	0.272334	0.762	2.792	8.88639	1.03593	20.2622	0.63122	0.594985	3.00723
231	95.08	119.485	25.367	29.59	0.201	0.0662437	1.3719	-0.456176	1.28533	-0.454176	0.520991	160	5.60927	4.57409	NE	46	0.272334	0.762	2.792	8.88639	1.03593	20.2622	0.63122	0.594985	3.00723
231	95.08	119.485	25.367	29.7	0.149	0.0662437	1.3719	-0.456176	1.28533	-0.454176	0.520991	160	5.60927	4.57409	NE	46	0.272334	0.762	2.792	8.88639	1.03593	20.2622	0.63122	0.594985	3.00723
231	95.08	119.485	25.367	30.99	0.031	0.0662437	1.3719	-0.456176	1.28533	-0.454176	0.520991	160	5.60927	4.57409	NE	46	0.272334	0.762	2.792	8.88639	1.03593	20.2622	0.63122	0.594985	3.00723
231	95.08	119.485	25.367	32.48	-0.084	0.0662437	1.3719	-0.456176	1.28533	-0.454176	0.520991	160	5.60927	4.57409	NE	46	0.272334	0.762	2.792	8.88639	1.03593	20.2622	0.63122	0.594985	3.00723
231	95.08	119.485	25.367	33.19	-0.16	0.0662437	1.3719	-0.456176	1.28533	-0.454176	0.520991	160	5.60927	4.57409	NE	46	0.272334	0.762	2.792	8.88639	1.03593	20.2622	0.63122	0.594985	3.00723
231	95.08	119.485	25.367	34.69	-0.312	0.0662437	1.3719	-0.456176	1.28533	-0.454176	0.520991	160	5.60927	4.57409	NE	46	0.272334	0.762	2.792	8.88639	1.03593	20.2622	0.63122	0.594985	3.00723
231	95.08	119.485	25.367	36.47	-0.511	0.0662437	1.3719	-0.456176	1.28533	-0.454176	0.520991	160	5.60927	4.57409	NE	46	0.272334	0.762	2.792	8.88639	1.03593	20.2622	0.63122	0.594985	3.00723
231	95.08	119.484	25.3669	52.79	-1.386	0.0662437	1.3719	-0.456176	1.28533	-0.454176	0.520991	160	5.60927	4.57409	NE	46	0.272334	0.762	2.792	8.88639	1.03593	20.2622	0.63122	0.594985	3.00723
231	95.08	119.484	25.3669	58.63	-1.529	0.0662437	1.3719	-0.456176	1.28533	-0.454176	0.520991	160	5.60927	4.57409	NE	46	0.272334	0.762	2.792	8.88639	1.03593	20.2622	0.63122	0.594985	3.00723
231	95.08	119.484	25.3668	63.84	-1.659	0.0662437	1.3719	-0.456176	1.28533	-0.454176	0.520991	160	5.60927	4.57409	NE	46	0.272334	0.762	2.792	8.88639	1.03593	20.2622	0.63122	0.594985	3.00723
35	213.94	119.306	25.3	0	2.604	0.0249608	1.11294	-0.154382	0.788715	-0.37471	0.984532	162	5.61117	4.58124	NE	44	0.317793	0.611	2.585	12.9369	0.951293	16.8984	0.433734	0.392971	2.69813
35	213.94	119.306	25.3	2.31	2.325	0.0249608	1.11294	-0.154382	0.788715	-0.37471	0.984532	162	5.61117	4.58124	NE	44	0.317793	0.611	2.585	12.9369	0.951293	16.8984	0.433734	0.392971	2.69813
35	213.94	119.306	25.3	4.44	2.108	0.0249608	1.11294	-0.154382	0.788715	-0.37471	0.984532	162	5.61117	4.58124	NE	44	0.317793	0.611	2.585	12.9369	0.951293	16.8984	0.433734	0.392971	2.69813
35	213.94	119.306	25.3	6.42	1.935	0.0249608	1.11294	-0.154382	0.788715	-0.37471	0.984532	162	5.61117	4.58124	NE	44	0.317793	0.611	2.585	12.9369	0.951293	16.8984	0.433734	0.392971	2.69813
35	213.94	119.306	25.3	9.09	1.695	0.0249608	1.11294	-0.154382	0.788715	-0.37471	0.984532	162	5.61117	4.58124	NE	44	0.317793	0.611	2.585	12.9369	0.951293	16.8984	0.433734	0.392971	2.69813
35	213.94	119.306	25.3001	11.94	1.485	0.0249608	1.11294	-0.154382	0.788715	-0.37471	0.984532	162	5.61117	4.58124	NE	44	0.317793	0.611	2.585	12.9369	0.951293	16.8984	0.433734	0.392971	2.69813
35	213.94	119.306	25.3001	15.87	1.291	0.0249608	1.11294	-0.154382	0.788715	-0.37471	0.984532	162	5.61117	4.58124	NE	44	0.317793	0.611	2.585	12.9369	0.951293	16.8984	0.433734	0.392971	2.69813
35	213.94	119.306	25.3001	20.51	1.107	0.0249608	1.11294	-0.154382	0.788715	-0.37471	0.984532	162	5.61117	4.58124	NE	44	0.317793	0.611	2.585	12.9369	0.951293	16.8984	0.433734	0.392971	2.69813
35	213.94	119.306	25.3002	25.57	1.02	0.0249608	1.11294	-0.154382	0.788715	-0.37471	0.984532	162	5.61117	4.58124	NE	44	0.317793	0.611	2.585	12.9369	0.951293	16.8984	0.433734	0.392971	2.69813
35	213.94	119.306	25.3002	31.77	0.89	0.0249608	1.11294	-0.154382	0.788715	-0.37471	0.984532	162	5.61117	4.58124	NE	44	0.317793	0.611	2.585	12.9369	0.951293	16.8984	0.433734	0.392971	2.69813
35	213.94	119.307	25.3003	39.4	0.699	0.0249608	1.11294	-0.154382	0.788715	-0.37471	0.984532	162	5.61117	4.58124	NE	44	0.317793	0.611	2.585	12.9369	0.951293	16.8984	0.433734	0.392971	2.69813
35	213.94	119.307	25.3003	48.14	0.478	0.0249608	1.11294	-0.154382	0.788715	-0.37471	0.984532	162	5.61117	4.58124	NE	44	0.317793	0.611	2.585	12.9369	0.951293	16.8984	0.433734	0.392971	2.69813
35	213.94	119.307	25.3004	57.33	0.168	0.0249608	1.11294	-0.154382	0.788715	-0.37471	0.984532	162	5.61117	4.58124	NE	44	0.317793	0.611	2.585	12.9369	0.951293	16.8984	0.433734	0.392971	2.69813
35	213.94	119.307	25.3005	66.2	-0.013	0.0249608	1.11294	-0.154382	0.788715	-0.37471	0.984532	162	5.61117	4.58124	NE	44	0.317793	0.611	2.585	12.9369	0.951293	16.8984	0.433734	0.392971	2.69813
35	213.94	119.307	25.3005	76.17	-0.166	0.0249608	1.11294	-0.154382	0.788715	-0.37471	0.984532	162	5.61117	4.58124	NE	44	0.317793	0.611	2.585	12.9369	0.951293	16.8984	0.433734	0.392971	2.69813
35	213.94	119.307	25.3006	83.15	-0.278	0.0249608	1.11294	-0.154382	0.788715	-0.37471	0.984532	162	5.61117	4.58124	NE	44	0.317793	0.611	2.585	12.9369	0.951293	16.8984	0.433734	0.392971	2.69813
35	213.94	119.307	25.3006	91.91	-0.397	0.0249608	1.11294	-0.154382	0.788715	-0.37471	0.984532	162	5.61117	4.58124	NE	44	0.317793	0.611	2.585	12.9369	0.951293	16.8984	0.433734	0.392971	2.69813
35	213.94	119.307	25.3007	99.57	-0.55	0.0249608	1.11294	-0.154382	0.788715	-0.37471	0.984532	162	5.61117	4.58124	NE	44	0.317793	0.611	2.585	12.9369	0.951293	16.8984	0.433734	0.392971	2.69813
35	213.94	119.307	25.3008	107.42	-0.724	0.0249608	1.11294	-0.154382	0.788715	-0.37471	0.984532	162	5.61117	4.58124	NE	44	0.317793	0.611	2.585	12.9369	0.951293	16.8984	0.433734	0.392971	2.69813
35	213.94	119.307	25.3008	115.26	-0.901	0.0249608	1.11294	-0.154382	0.788715	-0.37471	0.984532	162	5.61117	4.58124	NE	44	0.317793	0.611	2.585	12.9369	0.951293	16.8984	0.433734	0.392971	2.69813
35	213.94	119.307	25.3009	124.95	-1.092	0.0249608	1.11294	-0.154382	0.788715	-0.37471	0.984532	162	5.61117	4.58124	NE	44	0.317793	0.611	2.585	12.9369	0.951293	16.8984	0.433734	0.392971	2.69813
35	213.94	119.307	25.301	134.94	-1.236	0.0249608	1.11294	-0.154382	0.788715	-0.37471	0.984532	162	5.61117	4.58124	NE	44	0.317793	0.611	2.585	12.9369	0.951293	16.8984	0.433734	0.392971	2.69813
35	213.94	119.307	25.301	145.22	-1.363	0.0249608	1.11294	-0.154382	0.788715	-0.37471	0.984532	162	5.61117	4.58124	NE	44	0.317793	0.611	2.585	12.9369	0.951293	16.8984	0.433734	0.392971	2.69813
35	213.94	119.307	25.3011	154.83	-1.453	0.0249608	1.11294	-0.154382	0.788715	-0.37471	0.984532	162	5.61117	4.58124	NE	44	0.317793	0.611	2.585	12.9369	0.951293	16.8984	0.433734	0.392971	2.69813
35	213.94	119.307	25.3012	165.94	-1.538	0.0249608	1.11294	-0.154382	0.788715	-0.37471	0.984532	162	5.61117	4.58124	NE	44	0.317793	0.611	2.585	12.9369	0.951293	16.8984	0.433734	0.392971	2.69813
219	135.53	119.518	25.1711	0	2.804	0.0604062	0.255952	1.96606	1.13495	-0.504753	2.16318	166	5.59877	4.56325	ENE	68	0.263052	0.899	3.395	6.22769	7.13886	3.35251	0.899012	0.828297	3.75636
219	135.53	119.518	25.1711	1.66	2.588	0.0604062	0.255952	1.96606	1.13495	-0.504753	2.16318	166	5.59877	4.56325	ENE	68	0.263052	0.899	3.395	6.22769	7.13886	3.35251	0.899012	0.828297	3.75636
219	135.53	119.518	25.1711	3.14	2.41	0.0604062	0.255952	1.96606	1.13495	-0.504753	2.16318	166	5.59877	4.56325	ENE	68	0.263052	0.899	3.395	6.22769	7.13886	3.35251	0.899012	0.828297	3.75636
219	135.53	119.518	25.171	5.13	2.21	0.0604062	0.255952	1.96606	1.13495	-0.504753	2.16318	166	5.59877	4.56325	ENE	68	0.263052	0.899	3.395	6.22769	7.13886	3.35251	0.899012	0.828297	3.75636
219	135.53	119.518	25.171	7.6	2.07	0.0604062	0.255952	1.96606	1.13495	-0.504753	2.16318	166	5.59877	4.56325	ENE	68	0.263052	0.899	3.395	6.22769	7.13886	3.35251	0.899012	0.828297	3.75636
219	135.53	119.518	25.171	10.71	1.911	0.0604062	0.255952	1.96606	1.13495	-0.504753	2.16318	166	5.59877	4.56325	ENE	68	0.263052	0.899	3.395	6.22769	7.13886	3.35251	0.899012	0.828297	3.75636
219	135.53	119.518	25.171	12.47	1.802	0.0604062	0.255952	1.96606	1.13495	-0.504753	2.16318	166	5.59877	4.56325	ENE	68	0.263052	0.899	3.395	6.22769	7.13886	3.35251	0.899012	0.828297	3.75636
219	135.53	119.518	25.171	15.34	1.644	0.0604062	0.255952	1.96606	1.13495	-0.504753	2.16318	166	5.59877	4.56325	ENE	68	0.263052	0.899	3.395	6.22769	7.13886	3.35251	0.899012	0.828297	3.75636
219	135.53	119.518	25.171	18.7	1.473	0.0604062	0.255952	1.96606	1.13495	-0.504753	2.16318	166	5.59877	4.56325	ENE	68	0.263052	0.899	3.395	6.22769	7.13886	3.35251	0.899012	0.828297	3.75636
219	135.53	119.518	25.1709	23.21	1.216	0.0604062	0.255952	1.96606	1.13495	-0.504753	2.16318	166	5.59877	4.56325	ENE	68	0.263052	0.899	3.395	6.22769	7.13886	3.35251	0.899012	0.828297	3.75636
219	135.53	119.518	25.1709	27.38	0.989	0.0604062	0.255952	1.96606	1.13495	-0.504753	2.16318	166	5.59877	4.56325	ENE	68	0.263052	0.899	3.395	6.22769	7.13886	3.35251	0.899012	0.828297	3.75636
219	135.53	119.518	25.1709	31.24	0.796	0.0604062	0.255952	1.96606	1.13495	-0.504753	2.16318	166	5.59877	4.56325	ENE	68	0.263052	0.899	3.395	6.22769	7.13886	3.35251	0.899012	0.828297	3.75636
219	135.53	119.518	25.1708	34.62	0.637	0.0604062	0.255952	1.96606	1.13495	-0.504753	2.16318	166	5.59877	4.56325	ENE	68	0.263052	0.899	3.395	6.22769	7.13886	3.35251	0.899012	0.828297	3.75636
219	135.53	119.518	25.1708	38.65	0.42	0.0604062	0.255952	1.96606	1.13495	-0.504753	2.16318	166	5.59877	4.56325	ENE	68	0.263052	0.899	3.395	6.22769	7.13886	3.35251	0.899012	0.828297	3.75636
219	135.53	119.518	25.1708	41.85	0.276	0.0604062	0.255952	1.96606	1.13495	-0.504753	2.16318	166	5.59877	4.56325	ENE	68	0.263052	0.899	3.395	6.22769	7.13886	3.35251	0.899012	0.828297	3.75636
154	126.05	119.31	25.2418	0	2.711	0.0556451	0.351825	1.50707	0.828827	-0.0732624	0.798606	165	5.6136	4.57581	NE	48	0.326864	0.705	2.918	7.69681	4.24404	5.05821	0.729341	0.670577	3.39746
154	126.05	119.31	25.2418	1.25	2.511	0.0556451	0.351825	1.50707	0.828827	-0.0732624	0.798606	165	5.6136	4.57581	NE	48	0.326864	0.705	2.918	7.69681	4.24404	5.05821	0.729341	0.670577	3.39746
154	126.05	119.31	25.2418	2.6	2.319	0.0556451	0.351825	1.50707	0.828827	-0.0732624	0.798606	165	5.6136	4.57581	NE	48	0.326864	0.705	2.918	7.69681	4.24404	5.05821	0.729341	0.670577	3.39746
154	126.05	119.31	25.2417	3.96	2.102	0.0556451	0.351825	1.50707	0.828827	-0.0732624	0.798606	165	5.6136	4.57581	NE	48	0.326864	0.705	2.918	7.69681	4.24404	5.05821	0.729341	0.670577	3.39746
154	126.05	119.31	25.2417	5.28	1.888	0.0556451	0.351825	1.50707	0.828827	-0.0732624	0.798606	165	5.6136	4.57581	NE	48	0.326864	0.705	2.918	7.69681	4.24404	5.05821	0.729341	0.670577	3.39746
154	126.05	119.31	25.2417	6.58	1.695	0.0556451	0.351825	1.50707	0.828827	-0.0732624	0.798606	165	5.6136	4.57581	NE	48	0.326864	0.705	2.918	7.69681	4.24404	5.05821	0.729341	0.670577	3.39746
154	126.05	119.31	25.2417	7.89	1.538	0.0556451	0.351825	1.50707	0.828827	-0.0732624	0.798606	165	5.6136	4.57581	NE	48	0.326864	0.705	2.918	7.69681	4.24404	5.05821	0.729341	0.670577	3.39746
154	126.05	119.31	25.2417	9.45	1.379	0.0556451	0.351825	1.50707	0.828827	-0.0732624	0.798606	165	5.6136	4.57581	NE	48	0.326864	0.705	2.918	7.69681	4.24404	5.05821	0.729341	0.670577	3.39746
154	126.05	119.31	25.2417	11.33	1.193	0.0556451	0.351825	1.50707	0.828827	-0.0732624	0.798606	165	5.6136	4.57581	NE	48	0.326864	0.705	2.918	7.69681	4.24404	5.05821	0.729341	0.670577	3.39746
154	126.05	119.31	25.2417	12.86	1.057	0.0556451	0.351825	1.50707	0.828827	-0.0732624	0.798606	165	5.6136	4.57581	NE	48	0.326864	0.705	2.918	7.69681	4.24404	5.05821	0.729341	0.670577	3.39746
154	126.05	119.31	25.2416	15.25	0.928	0.0556451	0.351825	1.50707	0.828827	-0.0732624	0.798606	165	5.6136	4.57581	NE	48	0.326864	0.705	2.918	7.69681	4.24404	5.05821	0.729341	0.670577	3.39746
154	126.05	119.31	25.2416	18.69	0.769	0.0556451	0.351825	1.50707	0.828827	-0.0732624	0.798606	165	5.6136	4.57581	NE	48	0.326864	0.705	2.918	7.69681	4.24404	5.05821	0.729341	0.670577	3.39746
154	126.05	119.31	25.2416	21.58	0.602	0.0556451	0.351825	1.50707	0.828827	-0.0732624	0.798606	165	5.6136	4.57581	NE	48	0.326864	0.705	2.918	7.69681	4.24404	5.05821	0.729341	0.670577	3.39746
154	126.05	119.31	25.2416	27.15	0.31	0.0556451	0.351825	1.50707	0.828827	-0.0732624	0.798606	165	5.6136	4.57581	NE	48	0.326864	0.705	2.918	7.69681	4.24404	5.05821	0.729341	0.670577	3.39746
154	126.05	119.31	25.2415	31.49	0.104	0.0556451	0.351825	1.50707	0.828827	-0.0732624	0.798606	165	5.6136	4.57581	NE	48	0.326864	0.705	2.918	7.69681	4.24404	5.05821	0.729341	0.670577	3.39746
154	126.05	119.31	25.2415	36.83	-0.171	0.0556451	0.351825	1.50707	0.828827	-0.0732624	0.798606	165	5.6136	4.57581	NE	48	0.326864	0.705	2.918	7.69681	4.24404	5.05821	0.729341	0.670577	3.39746
154	126.05	119.31	25.2414	41.93	-0.388	0.0556451	0.351825	1.50707	0.828827	-0.0732624	0.798606	165	5.6136	4.57581	NE	48	0.326864	0.705	2.918	7.69681	4.24404	5.05821	0.729341	0.670577	3.39746
154	126.05	119.31	25.2414	47.3	-0.629	0.0556451	0.351825	1.50707	0.828827	-0.0732624	0.798606	165	5.6136	4.57581	NE	48	0.326864	0.705	2.918	7.69681	4.24404	5.05821	0.729341	0.670577	3.39746
154	126.05	119.31	25.2414	51.38	-0.764	0.0556451	0.351825	1.50707	0.828827	-0.0732624	0.798606	165	5.6136	4.57581	NE	48	0.326864	0.705	2.918	7.69681	4.24404	5.05821	0.729341	0.670577	3.39746
154	126.05	119.31	25.2413	55.86	-0.928	0.0556451	0.351825	1.50707	0.828827	-0.0732624	0.798606	165	5.6136	4.57581	NE	48	0.326864	0.705	2.918	7.69681	4.24404	5.05821	0.729341	0.670577	3.39746
154	126.05	119.31	25.2413	60.31	-1.091	0.0556451	0.351825	1.50707	0.828827	-0.0732624	0.798606	165	5.6136	4.57581	NE	48	0.326864	0.705	2.918	7.69681	4.24404	5.05821	0.729341	0.670577	3.39746
154	126.05	119.31	25.2413	64.48	-1.236	0.0556451	0.351825	1.50707	0.828827	-0.0732624	0.798606	165	5.6136	4.57581	NE	48	0.326864	0.705	2.918	7.69681	4.24404	5.05821	0.729341	0.670577	3.39746
154	126.05	119.31	25.2412	68.62	-1.39	0.0556451	0.351825	1.50707	0.828827	-0.0732624	0.798606	165	5.6136	4.57581	NE	48	0.326864	0.705	2.918	7.69681	4.24404	5.05821	0.729341	0.670577	3.39746
154	126.05	119.31	25.2412	72.19	-1.537	0.0556451	0.351825	1.50707	0.828827	-0.0732624	0.798606	165	5.6136	4.57581	NE	48	0.326864	0.705	2.918	7.69681	4.24404	5.05821	0.729341	0.670577	3.39746
154	126.05	119.31	25.2412	74.58	-1.604	0.0556451	0.351825	1.50707	0.828827	-0.0732624	0.798606	165	5.6136	4.57581	NE	48	0.326864	0.705	2.918	7.69681	4.24404	5.05821	0.729341	0.670577	3.39746
154	126.05	119.31	25.2411	79.91	-1.795	0.0556451	0.351825	1.50707	0.828827	-0.0732624	0.798606	165	5.6136	4.57581	NE	48	0.326864	0.705	2.918	7.69681	4.24404	5.05821	0.729341	0.670577	3.39746
154	126.05	119.311	25.2411	83.17	-1.917	0.0556451	0.351825	1.50707	0.828827	-0.0732624	0.798606	165	5.6136	4.57581	NE	48	0.326864	0.705	2.918	7.69681	4.24404	5.05821	0.729341	0.670577	3.39746
108	231.66	119.289	25.2251	0.004	2.809	0.030479	0.408481	1.29166	1.00531	-0.129059	1.00872	165	5.6136	4.57581	NE	48	0.326864	0.705	2.918	7.69681	3.54606	6.05383	0.729341	0.670577	3.39746
108	231.66	119.289	25.2251	3.274	2.333	0.030479	0.408481	1.29166	1.00531	-0.129059	1.00872	165	5.6136	4.57581	NE	48	0.326864	0.705	2.918	7.69681	3.54606	6.05383	0.729341	0.670577	3.39746
108	231.66	119.289	25.2251	6.264	1.954	0.030479	0.408481	1.29166	1.00531	-0.129059	1.00872	165	5.6136	4.57581	NE	48	0.326864	0.705	2.918	7.69681	3.54606	6.05383	0.729341	0.670577	3.39746
108	231.66	119.289	25.2251	9.154	1.631	0.030479	0.408481	1.29166	1.00531	-0.129059	1.00872	165	5.6136	4.57581	NE	48	0.326864	0.705	2.918	7.69681	3.54606	6.05383	0.729341	0.670577	3.39746
108	231.66	119.289	25.2251	12.744	1.237	0.030479	0.408481	1.29166	1.00531	-0.129059	1.00872	165	5.6136	4.57581	NE	48	0.326864	0.705	2.918	7.69681	3.54606	6.05383	0.729341	0.670577	3.39746
108	231.66	119.289	25.2251	15.294	1.148	0.030479	0.408481	1.29166	1.00531	-0.129059	1.00872	165	5.6136	4.57581	NE	48	0.326864	0.705	2.918	7.69681	3.54606	6.05383	0.729341	0.670577	3.39746
108	231.66	119.289	25.2251	22.394	1.07	0.030479	0.408481	1.29166	1.00531	-0.129059	1.00872	165	5.6136	4.57581	NE	48	0.326864	0.705	2.918	7.69681	3.54606	6.05383	0.729341	0.670577	3.39746
108	231.66	119.289	25.2251	28.584	0.936	0.030479	0.408481	1.29166	1.00531	-0.129059	1.00872	165	5.6136	4.57581	NE	48	0.326864	0.705	2.918	7.69681	3.54606	6.05383	0.729341	0.670577	3.39746
108	231.66	119.289	25.225	36.644	0.79	0.030479	0.408481	1.29166	1.00531	-0.129059	1.00872	165	5.6136	4.57581	NE	48	0.326864	0.705	2.918	7.69681	3.54606	6.05383	0.729341	0.670577	3.39746
108	231.66	119.289	25.225	44.914	0.607	0.030479	0.408481	1.29166	1.00531	-0.129059	1.00872	165	5.6136	4.57581	NE	48	0.326864	0.705	2.918	7.69681	3.54606	6.05383	0.729341	0.670577	3.39746
108	231.66	119.289	25.225	53.074	0.431	0.030479	0.408481	1.29166	1.00531	-0.129059	1.00872	165	5.6136	4.57581	NE	48	0.326864	0.705	2.918	7.69681	3.54606	6.05383	0.729341	0.670577	3.39746
108	231.66	119.289	25.225	61.554	0.269	0.030479	0.408481	1.29166	1.00531	-0.129059	1.00872	165	5.6136	4.57581	NE	48	0.326864	0.705	2.918	7.69681	3.54606	6.05383	0.729341	0.670577	3.39746
108	231.66	119.289	25.225	65.974	0.173	0.030479	0.408481	1.29166	1.00531	-0.129059	1.00872	165	5.6136	4.57581	NE	48	0.326864	0.705	2.918	7.69681	3.54606	6.05383	0.729341	0.670577	3.39746
108	231.66	119.289	25.2249	76.944	-0.08	0.030479	0.408481	1.29166	1.00531	-0.129059	1.00872	165	5.6136	4.57581	NE	48	0.326864	0.705	2.918	7.69681	3.54606	6.05383	0.729341	0.670577	3.39746
108	231.66	119.289	25.2249	86.634	-0.357	0.030479	0.408481	1.29166	1.00531	-0.129059	1.00872	165	5.6136	4.57581	NE	48	0.326864	0.705	2.918	7.69681	3.54606	6.05383	0.729341	0.670577	3.39746
108	231.66	119.289	25.2249	94.394	-0.605	0.030479	0.408481	1.29166	1.00531	-0.129059	1.00872	165	5.6136	4.57581	NE	48	0.326864	0.705	2.918	7.69681	3.54606	6.05383	0.729341	0.670577	3.39746
108	231.66	119.289	25.2249	102.964	-0.846	0.030479	0.408481	1.29166	1.00531	-0.129059	1.00872	165	5.6136	4.57581	NE	48	0.326864	0.705	2.918	7.69681	3.54606	6.05383	0.729341	0.670577	3.39746
108	231.66	119.29	25.2248	117.214	-1.215	0.030479	0.408481	1.29166	1.00531	-0.129059	1.00872	165	5.6136	4.57581	NE	48	0.326864	0.705	2.918	7.69681	3.54606	6.05383	0.729341	0.670577	3.39746
108	231.66	119.29	25.2248	128.564	-1.451	0.030479	0.408481	1.29166	1.00531	-0.129059	1.00872	165	5.6136	4.57581	NE	48	0.326864	0.705	2.918	7.69681	3.54606	6.05383	0.729341	0.670577	3.39746
108	231.66	119.29	25.2247	144.654	-1.765	0.030479	0.408481	1.29166	1.00531	-0.129059	1.00872	165	5.6136	4.57581	NE	48	0.326864	0.705	2.918	7.69681	3.54606	6.05383	0.729341	0.670577	3.39746
108	231.66	119.29	25.2247	164.124	-2.23	0.030479	0.408481	1.29166	1.00531	-0.129059	1.00872	165	5.6136	4.57581	NE	48	0.326864	0.705	2.918	7.69681	3.54606	6.05383	0.729341	0.670577	3.39746
108	231.66	119.29	25.2247	173.824	-2.496	0.030479	0.408481	1.29166	1.00531	-0.129059	1.00872	165	5.6136	4.57581	NE	48	0.326864	0.705	2.918	7.69681	3.54606	6.05383	0.729341	0.670577	3.39746
108	231.66	119.29	25.2247	176.384	-2.567	0.030479	0.408481	1.29166	1.00531	-0.129059	1.00872	165	5.6136	4.57581	NE	48	0.326864	0.705	2.918	7.69681	3.54606	6.05383	0.729341	0.670577	3.39746
83	224.6	118.907	24.9218	0	2.633	0.021472	0.310866	1.68563	0.59617	-0.215746	0.980161	173	5.47241	4.44759	E	85	0.446366	1.25	5.023	5.12909	5.41383	4.33083	1.06694	0.93219	4.55054
83	224.6	118.907	24.9218	1.88	2.356	0.021472	0.310866	1.68563	0.59617	-0.215746	0.980161	173	5.47241	4.44759	E	85	0.446366	1.25	5.023	5.12909	5.41383	4.33083	1.06694	0.93219	4.55054
83	224.6	118.907	24.9218	6.99	2.169	0.021472	0.310866	1.68563	0.59617	-0.215746	0.980161	173	5.47241	4.44759	E	85	0.446366	1.25	5.023	5.12909	5.41383	4.33083	1.06694	0.93219	4.55054
83	224.6	118.907	24.9218	13.77	2.031	0.021472	0.310866	1.68563	0.59617	-0.215746	0.980161	173	5.47241	4.44759	E	85	0.446366	1.25	5.023	5.12909	5.41383	4.33083	1.06694	0.93219	4.55054
83	224.6	118.908	24.9218	26.18	1.848	0.021472	0.310866	1.68563	0.59617	-0.215746	0.980161	173	5.47241	4.44759	E	85	0.446366	1.25	5.023	5.12909	5.41383	4.33083	1.06694	0.93219	4.55054
83	224.6	118.908	24.9218	37.45	1.612	0.021472	0.310866	1.68563	0.59617	-0.215746	0.980161	173	5.47241	4.44759	E	85	0.446366	1.25	5.023	5.12909	5.41383	4.33083	1.06694	0.93219	4.55054
83	224.6	118.908	24.9218	47.31	1.467	0.021472	0.310866	1.68563	0.59617	-0.215746	0.980161	173	5.47241	4.44759	E	85	0.446366	1.25	5.023	5.12909	5.41383	4.33083	1.06694	0.93219	4.55054
83	224.6	118.908	24.9218	57.93	1.429	0.021472	0.310866	1.68563	0.59617	-0.215746	0.980161	173	5.47241	4.44759	E	85	0.446366	1.25	5.023	5.12909	5.41383	4.33083	1.06694	0.93219	4.55054
83	224.6	118.908	24.9218	71.99	1.248	0.021472	0.310866	1.68563	0.59617	-0.215746	0.980161	173	5.47241	4.44759	E	85	0.446366	1.25	5.023	5.12909	5.41383	4.33083	1.06694	0.93219	4.55054
83	224.6	118.908	24.9218	89.81	0.955	0.021472	0.310866	1.68563	0.59617	-0.215746	0.980161	173	5.47241	4.44759	E	85	0.446366	1.25	5.023	5.12909	5.41383	4.33083	1.06694	0.93219	4.55054
83	224.6	118.908	24.9219	111.32	0.461	0.021472	0.310866	1.68563	0.59617	-0.215746	0.980161	173	5.47241	4.44759	E	85	0.446366	1.25	5.023	5.12909	5.41383	4.33083	1.06694	0.93219	4.55054
83	224.6	118.909	24.9219	130.97	-0.009	0.021472	0.310866	1.68563	0.59617	-0.215746	0.980161	173	5.47241	4.44759	E	85	0.446366	1.25	5.023	5.12909	5.41383	4.33083	1.06694	0.93219	4.55054
83	224.6	118.909	24.9219	151.91	-0.556	0.021472	0.310866	1.68563	0.59617	-0.215746	0.980161	173	5.47241	4.44759	E	85	0.446366	1.25	5.023	5.12909	5.41383	4.33083	1.06694	0.93219	4.55054
83	224.6	118.909	24.9219	167.68	-0.942	0.021472	0.310866	1.68563	0.59617	-0.215746	0.980161	173	5.47241	4.44759	E	85	0.446366	1.25	5.023	5.12909	5.41383	4.33083	1.06694	0.93219	4.55054
83	224.6	118.909	24.9219	187.64	-1.396	0.021472	0.310866	1.68563	0.59617	-0.215746	0.980161	173	5.47241	4.44759	E	85	0.446366	1.25	5.023	5.12909	5.41383	4.33083	1.06694	0.93219	4.55054
61	446.24	118.921	24.9064	0	2.585	0.0126715	0.160656	2.63796	0.701553	-0.410646	2.8667	173	5.47241	4.44759	E	85	0.446366	1.25	5.023	5.12909	13.797	1.69939	1.06694	0.93219	4.55054
61	446.24	118.921	24.9064	13.61	2.348	0.0126715	0.160656	2.63796	0.701553	-0.410646	2.8667	173	5.47241	4.44759	E	85	0.446366	1.25	5.023	5.12909	13.797	1.69939	1.06694	0.93219	4.55054
61	446.24	118.921	24.9065	27.97	2.158	0.0126715	0.160656	2.63796	0.701553	-0.410646	2.8667	173	5.47241	4.44759	E	85	0.446366	1.25	5.023	5.12909	13.797	1.69939	1.06694	0.93219	4.55054
61	446.24	118.922	24.9066	53.33	1.816	0.0126715	0.160656	2.63796	0.701553	-0.410646	2.8667	173	5.47241	4.44759	E	85	0.446366	1.25	5.023	5.12909	13.797	1.69939	1.06694	0.93219	4.55054
61	446.24	118.922	24.9067	82.55	1.416	0.0126715	0.160656	2.63796	0.701553	-0.410646	2.8667	173	5.47241	4.44759	E	85	0.446366	1.25	5.023	5.12909	13.797	1.69939	1.06694	0.93219	4.55054
61	446.24	118.922	24.9068	107.41	1.05	0.0126715	0.160656	2.63796	0.701553	-0.410646	2.8667	173	5.47241	4.44759	E	85	0.446366	1.25	5.023	5.12909	13.797	1.69939	1.06694	0.93219	4.55054
61	446.24	118.922	24.9069	133.43	0.691	0.0126715	0.160656	2.63796	0.701553	-0.410646	2.8667	173	5.47241	4.44759	E	85	0.446366	1.25	5.023	5.12909	13.797	1.69939	1.06694	0.93219	4.55054
61	446.24	118.922	24.9071	163.22	0.288	0.0126715	0.160656	2.63796	0.701553	-0.410646	2.8667	173	5.47241	4.44759	E	85	0.446366	1.25	5.023	5.12909	13.797	1.69939	1.06694	0.93219	4.55054
61	446.24	118.923	24.9072	196.2	-0.116	0.0126715	0.160656	2.63796	0.701553	-0.410646	2.8667	173	5.47241	4.44759	E	85	0.446366	1.25	5.023	5.12909	13.797	1.69939	1.06694	0.93219	4.55054
61	446.24	118.923	24.9073	223.89	-0.524	0.0126715	0.160656	2.63796	0.701553	-0.410646	2.8667	173	5.47241	4.44759	E	85	0.446366	1.25	5.023	5.12909	13.797	1.69939	1.06694	0.93219	4.55054
61	446.24	118.923	24.9075	254.29	-0.907	0.0126715	0.160656	2.63796	0.701553	-0.410646	2.8667	173	5.47241	4.44759	E	85	0.446366	1.25	5.023	5.12909	13.797	1.69939	1.06694	0.93219	4.55054
61	446.24	118.923	24.9076	277.61	-1.223	0.0126715	0.160656	2.63796	0.701553	-0.410646	2.8667	173	5.47241	4.44759	E	85	0.446366	1.25	5.023	5.12909	13.797	1.69939	1.06694	0.93219	4.55054
61	446.24	118.924	24.9077	305.85	-1.516	0.0126715	0.160656	2.63796	0.701553	-0.410646	2.8667	173	5.47241	4.44759	E	85	0.446366	1.25	5.023	5.12909	13.797	1.69939	1.06694	0.93219	4.55054
61	446.24	118.924	24.9078	337.96	-1.75	0.0126715	0.160656	2.63796	0.701553	-0.410646	2.8667	173	5.47241	4.44759	E	85	0.446366	1.25	5.023	5.12909	13.797	1.69939	1.06694	0.93219	4.55054
61	446.24	118.924	24.908	366.43	-2.021	0.0126715	0.160656	2.63796	0.701553	-0.410646	2.8667	173	5.47241	4.44759	E	85	0.446366	1.25	5.023	5.12909	13.797	1.69939	1.06694	0.93219	4.55054
61	446.24	118.924	24.908	383.67	-2.165	0.0126715	0.160656	2.63796	0.701553	-0.410646	2.8667	173	5.47241	4.44759	E	85	0.446366	1.25	5.023	5.12909	13.797	1.69939	1.06694	0.93219	4.55054
61	446.24	118.924	24.908	384.49	-2.243	0.0126715	0.160656	2.63796	0.701553	-0.410646	2.8667	173	5.47241	4.44759	E	85	0.446366	1.25	5.023	5.12909	13.797	1.69939	1.06694	0.93219	4.55054
61	446.24	118.924	24.9081	391.51	-2.376	0.0126715	0.160656	2.63796	0.701553	-0.410646	2.8667	173	5.47241	4.44759	E	85	0.446366	1.25	5.023	5.12909	13.797	1.69939	1.06694	0.93219	4.55054
42	409.26	118.926	24.9008	0	2.744	0.0127532	0.785975	0.347444	1.38056	-0.304933	0.772526	173	5.47241	4.44759	E	85	0.446366	1.25	5.023	5.12909	1.91982	12.2128	1.06694	0.93219	4.55054
42	409.26	118.926	24.9008	2.4	2.546	0.0127532	0.785975	0.347444	1.38056	-0.304933	0.772526	173	5.47241	4.44759	E	85	0.446366	1.25	5.023	5.12909	1.91982	12.2128	1.06694	0.93219	4.55054
42	409.26	118.926	24.9008	3.98	2.373	0.0127532	0.785975	0.347444	1.38056	-0.304933	0.772526	173	5.47241	4.44759	E	85	0.446366	1.25	5.023	5.12909	1.91982	12.2128	1.06694	0.93219	4.55054
42	409.26	118.926	24.9008	8.29	2.126	0.0127532	0.785975	0.347444	1.38056	-0.304933	0.772526	173	5.47241	4.44759	E	85	0.446366	1.25	5.023	5.12909	1.91982	12.2128	1.06694	0.93219	4.55054
42	409.26	118.926	24.9009	23.43	1.849	0.0127532	0.785975	0.347444	1.38056	-0.304933	0.772526	173	5.47241	4.44759	E	85	0.446366	1.25	5.023	5.12909	1.91982	12.2128	1.06694	0.93219	4.55054
42	409.26	118.926	24.9011	51.62	1.365	0.0127532	0.785975	0.347444	1.38056	-0.304933	0.772526	173	5.47241	4.44759	E	85	0.446366	1.25	5.023	5.12909	1.91982	12.2128	1.06694	0.93219	4.55054
42	409.26	118.926	24.9013	76.91	0.901	0.0127532	0.785975	0.347444	1.38056	-0.304933	0.772526	173	5.47241	4.44759	E	85	0.446366	1.25	5.023	5.12909	1.91982	12.2128	1.06694	0.93219	4.55054
42	409.26	118.927	24.9015	101.93	0.567	0.0127532	0.785975	0.347444	1.38056	-0.304933	0.772526	173	5.47241	4.44759	E	85	0.446366	1.25	5.023	5.12909	1.91982	12.2128	1.06694	0.93219	4.55054
42	409.26	118.927	24.9017	140.66	0.086	0.0127532	0.785975	0.347444	1.38056	-0.304933	0.772526	173	5.47241	4.44759	E	85	0.446366	1.25	5.023	5.12909	1.91982	12.2128	1.06694	0.93219	4.55054
42	409.26	118.927	24.902	178	-0.289	0.0127532	0.785975	0.347444	1.38056	-0.304933	0.772526	173	5.47241	4.44759	E	85	0.446366	1.25	5.023	5.12909	1.91982	12.2128	1.06694	0.93219	4.55054
42	409.26	118.927	24.9025	248.83	-1.018	0.0127532	0.785975	0.347444	1.38056	-0.304933	0.772526	173	5.47241	4.44759	E	85	0.446366	1.25	5.023	5.12909	1.91982	12.2128	1.06694	0.93219	4.55054
42	409.26	118.928	24.9027	283.92	-1.334	0.0127532	0.785975	0.347444	1.38056	-0.304933	0.772526	173	5.47241	4.44759	E	85	0.446366	1.25	5.023	5.12909	1.91982	12.2128	1.06694	0.93219	4.55054
42	409.26	118.928	24.9031	343.14	-1.798	0.0127532	0.785975	0.347444	1.38056	-0.304933	0.772526	173	5.47241	4.44759	E	85	0.446366	1.25	5.023	5.12909	1.91982	12.2128	1.06694	0.93219	4.55054
42	409.26	118.928	24.9032	360.85	-1.858	0.0127532	0.785975	0.347444	1.38056	-0.304933	0.772526	173	5.47241	4.44759	E	85	0.446366	1.25	5.023	5.12909	1.91982	12.2128	1.06694	0.93219	4.55054
155	93.06	118.931	24.8761	0	2.652	0.0779172	0.98927	0.0155638	0.444145	-0.110871	1.04234	174	5.37108	4.36204	E	91	0.552051	0.785	4.572	5.8903	1.29516	15.1887	0.911853	0.758977	4.63533
155	93.06	118.931	24.8761	1.54	2.404	0.0779172	0.98927	0.0155638	0.444145	-0.110871	1.04234	174	5.37108	4.36204	E	91	0.552051	0.785	4.572	5.8903	1.29516	15.1887	0.911853	0.758977	4.63533
155	93.06	118.931	24.8761	2.43	2.189	0.0779172	0.98927	0.0155638	0.444145	-0.110871	1.04234	174	5.37108	4.36204	E	91	0.552051	0.785	4.572	5.8903	1.29516	15.1887	0.911853	0.758977	4.63533
155	93.06	118.931	24.8761	3.72	2.013	0.0779172	0.98927	0.0155638	0.444145	-0.110871	1.04234	174	5.37108	4.36204	E	91	0.552051	0.785	4.572	5.8903	1.29516	15.1887	0.911853	0.758977	4.63533
155	93.06	118.931	24.8761	4.95	1.841	0.0779172	0.98927	0.0155638	0.444145	-0.110871	1.04234	174	5.37108	4.36204	E	91	0.552051	0.785	4.572	5.8903	1.29516	15.1887	0.911853	0.758977	4.63533
155	93.06	118.931	24.876	6.35	1.595	0.0779172	0.98927	0.0155638	0.444145	-0.110871	1.04234	174	5.37108	4.36204	E	91	0.552051	0.785	4.572	5.8903	1.29516	15.1887	0.911853	0.758977	4.63533
155	93.06	118.931	24.876	7.9	1.376	0.0779172	0.98927	0.0155638	0.444145	-0.110871	1.04234	174	5.37108	4.36204	E	91	0.552051	0.785	4.572	5.8903	1.29516	15.1887	0.911853	0.758977	4.63533
155	93.06	118.931	24.876	9.71	1.101	0.0779172	0.98927	0.0155638	0.444145	-0.110871	1.04234	174	5.37108	4.36204	E	91	0.552051	0.785	4.572	5.8903	1.29516	15.1887	0.911853	0.758977	4.63533
155	93.06	118.931	24.876	11.69	0.832	0.0779172	0.98927	0.0155638	0.444145	-0.110871	1.04234	174	5.37108	4.36204	E	91	0.552051	0.785	4.572	5.8903	1.29516	15.1887	0.911853	0.758977	4.63533
155	93.06	118.931	24.876	13.42	0.527	0.0779172	0.98927	0.0155638	0.444145	-0.110871	1.04234	174	5.37108	4.36204	E	91	0.552051	0.785	4.572	5.8903	1.29516	15.1887	0.911853	0.758977	4.63533
155	93.06	118.931	24.876	14.82	0.34	0.0779172	0.98927	0.0155638	0.444145	-0.110871	1.04234	174	5.37108	4.36204	E	91	0.552051	0.785	4.572	5.8903	1.29516	15.1887	0.911853	0.758977	4.63533
155	93.06	118.931	24.876	16.27	0.173	0.0779172	0.98927	0.0155638	0.444145	-0.110871	1.04234	174	5.37108	4.36204	E	91	0.552051	0.785	4.572	5.8903	1.29516	15.1887	0.911853	0.758977	4.63533
155	93.06	118.931	24.876	17.68	-0.028	0.0779172	0.98927	0.0155638	0.444145	-0.110871	1.04234	174	5.37108	4.36204	E	91	0.552051	0.785	4.572	5.8903	1.29516	15.1887	0.911853	0.758977	4.63533
155	93.06	118.931	24.8759	19.33	-0.229	0.0779172	0.98927	0.0155638	0.444145	-0.110871	1.04234	174	5.37108	4.36204	E	91	0.552051	0.785	4.572	5.8903	1.29516	15.1887	0.911853	0.758977	4.63533
155	93.06	118.931	24.8759	20.85	-0.413	0.0779172	0.98927	0.0155638	0.444145	-0.110871	1.04234	174	5.37108	4.36204	E	91	0.552051	0.785	4.572	5.8903	1.29516	15.1887	0.911853	0.758977	4.63533
155	93.06	118.931	24.8759	23.85	-0.774	0.0779172	0.98927	0.0155638	0.444145	-0.110871	1.04234	174	5.37108	4.36204	E	91	0.552051	0.785	4.572	5.8903	1.29516	15.1887	0.911853	0.758977	4.63533
155	93.06	118.931	24.8757	53.92	-2.243	0.0779172	0.98927	0.0155638	0.444145	-0.110871	1.04234	174	5.37108	4.36204	E	91	0.552051	0.785	4.572	5.8903	1.29516	15.1887	0.911853	0.758977	4.63533
155	93.06	118.931	24.8756	64.53	-2.376	0.0779172	0.98927	0.0155638	0.444145	-0.110871	1.04234	174	5.37108	4.36204	E	91	0.552051	0.785	4.572	5.8903	1.29516	15.1887	0.911853	0.758977	4.63533
153	181.54	118.783	24.8609	0	2.542	0.0237591	0.562128	0.831029	0.815055	-0.189396	1.25029	175	5.29862	4.30395	E	96	0.347748	5.196	4.228	6.23418	2.00096	8.66558	0.84993	0.675955	4.90171
153	181.54	118.783	24.8609	1.55	2.373	0.0237591	0.562128	0.831029	0.815055	-0.189396	1.25029	175	5.29862	4.30395	E	96	0.347748	5.196	4.228	6.23418	2.00096	8.66558	0.84993	0.675955	4.90171
153	181.54	118.783	24.8609	3.65	2.172	0.0237591	0.562128	0.831029	0.815055	-0.189396	1.25029	175	5.29862	4.30395	E	96	0.347748	5.196	4.228	6.23418	2.00096	8.66558	0.84993	0.675955	4.90171
153	181.54	118.783	24.8609	5.78	1.984	0.0237591	0.562128	0.831029	0.815055	-0.189396	1.25029	175	5.29862	4.30395	E	96	0.347748	5.196	4.228	6.23418	2.00096	8.66558	0.84993	0.675955	4.90171
153	181.54	118.783	24.8609	8.38	1.815	0.0237591	0.562128	0.831029	0.815055	-0.189396	1.25029	175	5.29862	4.30395	E	96	0.347748	5.196	4.228	6.23418	2.00096	8.66558	0.84993	0.675955	4.90171
153	181.54	118.783	24.8609	11.1	1.665	0.0237591	0.562128	0.831029	0.815055	-0.189396	1.25029	175	5.29862	4.30395	E	96	0.347748	5.196	4.228	6.23418	2.00096	8.66558	0.84993	0.675955	4.90171
153	181.54	118.783	24.8609	12.12	1.602	0.0237591	0.562128	0.831029	0.815055	-0.189396	1.25029	175	5.29862	4.30395	E	96	0.347748	5.196	4.228	6.23418	2.00096	8.66558	0.84993	0.675955	4.90171
153	181.54	118.783	24.8608	15.55	1.398	0.0237591	0.562128	0.831029	0.815055	-0.189396	1.25029	175	5.29862	4.30395	E	96	0.347748	5.196	4.228	6.23418	2.00096	8.66558	0.84993	0.675955	4.90171
153	181.54	118.783	24.8608	18.94	1.229	0.0237591	0.562128	0.831029	0.815055	-0.189396	1.25029	175	5.29862	4.30395	E	96	0.347748	5.196	4.228	6.23418	2.00096	8.66558	0.84993	0.675955	4.90171
153	181.54	118.783	24.8608	22.8	1.06	0.0237591	0.562128	0.831029	0.815055	-0.189396	1.25029	175	5.29862	4.30395	E	96	0.347748	5.196	4.228	6.23418	2.00096	8.66558	0.84993	0.675955	4.90171
153	181.54	118.783	24.8607	27.02	0.897	0.0237591	0.562128	0.831029	0.815055	-0.189396	1.25029	175	5.29862	4.30395	E	96	0.347748	5.196	4.228	6.23418	2.00096	8.66558	0.84993	0.675955	4.90171
153	181.54	118.783	24.8607	31.77	0.752	0.0237591	0.562128	0.831029	0.815055	-0.189396	1.25029	175	5.29862	4.30395	E	96	0.347748	5.196	4.228	6.23418	2.00096	8.66558	0.84993	0.675955	4.90171
153	181.54	118.783	24.8607	36.65	0.593	0.0237591	0.562128	0.831029	0.815055	-0.189396	1.25029	175	5.29862	4.30395	E	96	0.347748	5.196	4.228	6.23418	2.00096	8.66558	0.84993	0.675955	4.90171
153	181.54	118.783	24.8606	44.05	0.363	0.0237591	0.562128	0.831029	0.815055	-0.189396	1.25029	175	5.29862	4.30395	E	96	0.347748	5.196	4.228	6.23418	2.00096	8.66558	0.84993	0.675955	4.90171
153	181.54	118.784	24.8605	51.52	0.14	0.0237591	0.562128	0.831029	0.815055	-0.189396	1.25029	175	5.29862	4.30395	E	96	0.347748	5.196	4.228	6.23418	2.00096	8.66558	0.84993	0.675955	4.90171
153	181.54	118.784	24.8605	60.24	-0.12	0.0237591	0.562128	0.831029	0.815055	-0.189396	1.25029	175	5.29862	4.30395	E	96	0.347748	5.196	4.228	6.23418	2.00096	8.66558	0.84993	0.675955	4.90171
153	181.54	118.784	24.8604	70.7	-0.351	0.0237591	0.562128	0.831029	0.815055	-0.189396	1.25029	175	5.29862	4.30395	E	96	0.347748	5.196	4.228	6.23418	2.00096	8.66558	0.84993	0.675955	4.90171
153	181.54	118.784	24.8602	87.22	-0.56	0.0237591	0.562128	0.831029	0.815055	-0.189396	1.25029	175	5.29862	4.30395	E	96	0.347748	5.196	4.228	6.23418	2.00096	8.66558	0.84993	0.675955	4.90171
153	181.54	118.784	24.8601	103.04	-0.643	0.0237591	0.562128	0.831029	0.815055	-0.189396	1.25029	175	5.29862	4.30395	E	96	0.347748	5.196	4.228	6.23418	2.00096	8.66558	0.84993	0.675955	4.90171
153	181.54	118.784	24.8599	133.36	-0.996	0.0237591	0.562128	0.831029	0.815055	-0.189396	1.25029	175	5.29862	4.30395	E	96	0.347748	5.196	4.228	6.23418	2.00096	8.66558	0.84993	0.675955	4.90171
153	181.54	118.784	24.8597	152.91	-1.091	0.0237591	0.562128	0.831029	0.815055	-0.189396	1.25029	175	5.29862	4.30395	E	96	0.347748	5.196	4.228	6.23418	2.00096	8.66558	0.84993	0.675955	4.90171
105	199.94	118.645	24.6623	0	2.424	0.0166087	0.513705	0.960988	0.592114	-0.234867	0.933155	177	5.13989	4.17062	E	85	0.47611	1.307	5.508	4.6288	2.85575	7.8577	1.11041	0.939688	4.94846
105	199.94	118.645	24.6623	2.19	2.123	0.0166087	0.513705	0.960988	0.592114	-0.234867	0.933155	177	5.13989	4.17062	E	85	0.47611	1.307	5.508	4.6288	2.85575	7.8577	1.11041	0.939688	4.94846
105	199.94	118.645	24.6623	4.48	1.813	0.0166087	0.513705	0.960988	0.592114	-0.234867	0.933155	177	5.13989	4.17062	E	85	0.47611	1.307	5.508	4.6288	2.85575	7.8577	1.11041	0.939688	4.94846
105	199.94	118.645	24.6623	6.99	1.562	0.0166087	0.513705	0.960988	0.592114	-0.234867	0.933155	177	5.13989	4.17062	E	85	0.47611	1.307	5.508	4.6288	2.85575	7.8577	1.11041	0.939688	4.94846
105	199.94	118.645	24.6623	9.32	1.288	0.0166087	0.513705	0.960988	0.592114	-0.234867	0.933155	177	5.13989	4.17062	E	85	0.47611	1.307	5.508	4.6288	2.85575	7.8577	1.11041	0.939688	4.94846
105	199.94	118.645	24.6623	11.81	1.05	0.0166087	0.513705	0.960988	0.592114	-0.234867	0.933155	177	5.13989	4.17062	E	85	0.47611	1.307	5.508	4.6288	2.85575	7.8577	1.11041	0.939688	4.94846
105	199.94	118.645	24.6623	14.15	0.855	0.0166087	0.513705	0.960988	0.592114	-0.234867	0.933155	177	5.13989	4.17062	E	85	0.47611	1.307	5.508	4.6288	2.85575	7.8577	1.11041	0.939688	4.94846
105	199.94	118.645	24.6622	22.07	0.972	0.0166087	0.513705	0.960988	0.592114	-0.234867	0.933155	177	5.13989	4.17062	E	85	0.47611	1.307	5.508	4.6288	2.85575	7.8577	1.11041	0.939688	4.94846
105	199.94	118.645	24.6622	44.55	0.77	0.0166087	0.513705	0.960988	0.592114	-0.234867	0.933155	177	5.13989	4.17062	E	85	0.47611	1.307	5.508	4.6288	2.85575	7.8577	1.11041	0.939688	4.94846
105	199.94	118.646	24.6621	74.76	0.612	0.0166087	0.513705	0.960988	0.592114	-0.234867	0.933155	177	5.13989	4.17062	E	85	0.47611	1.307	5.508	4.6288	2.85575	7.8577	1.11041	0.939688	4.94846
105	199.94	118.646	24.6621	101.63	0.345	0.0166087	0.513705	0.960988	0.592114	-0.234867	0.933155	177	5.13989	4.17062	E	85	0.47611	1.307	5.508	4.6288	2.85575	7.8577	1.11041	0.939688	4.94846
105	199.94	118.646	24.662	125.95	0.093	0.0166087	0.513705	0.960988	0.592114	-0.234867	0.933155	177	5.13989	4.17062	E	85	0.47611	1.307	5.508	4.6288	2.85575	7.8577	1.11041	0.939688	4.94846
105	199.94	118.646	24.6619	149.44	-0.058	0.0166087	0.513705	0.960988	0.592114	-0.234867	0.933155	177	5.13989	4.17062	E	85	0.47611	1.307	5.508	4.6288	2.85575	7.8577	1.11041	0.939688	4.94846
