# Supplementary material
Source: ML conference proceedings conference paper supplement (https://openreview.net/forum?id=Cug26Y0RlT)
Supplement: supplementary_material [file beachdata_train.xlsx]

## Sheet: 无海堤
Profile Azimuth	Profile Length	Longitude	Latitude	x	y	Intertidal Slope	Mean Grain Size	Mean Grain Size (Mz)	Sorting Coefficient	Skewness	Kurtosis	Corresponding Tidal Station Index	Annual Mean Spring Tidal Range	Annual Mean Tidal Range	Dominant Wave Direction	Dominant Wave Direction (Degrees)	Frequency	Mean Wave Height	Period	Relative Tidal Range	Dimensionless Settling Velocity	High Tide Sediment Settling Velocity	Breaker Wave Height Hb	Deep Water Wave Height Hd	Annual Mean Period
29	146.78	119.739	25.6371	0	2.682	0.0563673	0.704172	0.506	1.246	0.086	0.938	147	5.60574	4.55496	ENE	65	0.433182	1.149	5.043	4.58055	2.50048	10.9513	1.22381	1.11659	4.46916
29	146.78	119.739	25.6371	3.16	2.433	0.0563673	0.704172	0.506	1.246	0.086	0.938	147	5.60574	4.55496	ENE	65	0.433182	1.149	5.043	4.58055	2.50048	10.9513	1.22381	1.11659	4.46916
29	146.78	119.739	25.6371	6.68	2.172	0.0563673	0.704172	0.506	1.246	0.086	0.938	147	5.60574	4.55496	ENE	65	0.433182	1.149	5.043	4.58055	2.50048	10.9513	1.22381	1.11659	4.46916
29	146.78	119.739	25.6371	10.16	1.911	0.0563673	0.704172	0.506	1.246	0.086	0.938	147	5.60574	4.55496	ENE	65	0.433182	1.149	5.043	4.58055	2.50048	10.9513	1.22381	1.11659	4.46916
29	146.78	119.739	25.6372	13.34	1.664	0.0563673	0.704172	0.506	1.246	0.086	0.938	147	5.60574	4.55496	ENE	65	0.433182	1.149	5.043	4.58055	2.50048	10.9513	1.22381	1.11659	4.46916
29	146.78	119.739	25.6372	16.63	1.42	0.0563673	0.704172	0.506	1.246	0.086	0.938	147	5.60574	4.55496	ENE	65	0.433182	1.149	5.043	4.58055	2.50048	10.9513	1.22381	1.11659	4.46916
29	146.78	119.739	25.6372	19.96	1.182	0.0563673	0.704172	0.506	1.246	0.086	0.938	147	5.60574	4.55496	ENE	65	0.433182	1.149	5.043	4.58055	2.50048	10.9513	1.22381	1.11659	4.46916
29	146.78	119.739	25.6372	23.12	0.986	0.0563673	0.704172	0.506	1.246	0.086	0.938	147	5.60574	4.55496	ENE	65	0.433182	1.149	5.043	4.58055	2.50048	10.9513	1.22381	1.11659	4.46916
29	146.78	119.739	25.6373	26.97	0.728	0.0563673	0.704172	0.506	1.246	0.086	0.938	147	5.60574	4.55496	ENE	65	0.433182	1.149	5.043	4.58055	2.50048	10.9513	1.22381	1.11659	4.46916
29	146.78	119.739	25.6373	30.48	0.515	0.0563673	0.704172	0.506	1.246	0.086	0.938	147	5.60574	4.55496	ENE	65	0.433182	1.149	5.043	4.58055	2.50048	10.9513	1.22381	1.11659	4.46916
29	146.78	119.739	25.6373	35.09	0.327	0.0563673	0.704172	0.506	1.246	0.086	0.938	147	5.60574	4.55496	ENE	65	0.433182	1.149	5.043	4.58055	2.50048	10.9513	1.22381	1.11659	4.46916
29	146.78	119.739	25.6374	40.36	0.059	0.0563673	0.704172	0.506	1.246	0.086	0.938	147	5.60574	4.55496	ENE	65	0.433182	1.149	5.043	4.58055	2.50048	10.9513	1.22381	1.11659	4.46916
29	146.78	119.739	25.6374	44.93	-0.104	0.0563673	0.704172	0.506	1.246	0.086	0.938	147	5.60574	4.55496	ENE	65	0.433182	1.149	5.043	4.58055	2.50048	10.9513	1.22381	1.11659	4.46916
29	146.78	119.739	25.6374	49.02	-0.22	0.0563673	0.704172	0.506	1.246	0.086	0.938	147	5.60574	4.55496	ENE	65	0.433182	1.149	5.043	4.58055	2.50048	10.9513	1.22381	1.11659	4.46916
29	146.78	119.739	25.6375	53.2	-0.313	0.0563673	0.704172	0.506	1.246	0.086	0.938	147	5.60574	4.55496	ENE	65	0.433182	1.149	5.043	4.58055	2.50048	10.9513	1.22381	1.11659	4.46916
29	146.78	119.739	25.6375	56.94	-0.487	0.0563673	0.704172	0.506	1.246	0.086	0.938	147	5.60574	4.55496	ENE	65	0.433182	1.149	5.043	4.58055	2.50048	10.9513	1.22381	1.11659	4.46916
29	146.78	119.739	25.6375	60.54	-0.689	0.0563673	0.704172	0.506	1.246	0.086	0.938	147	5.60574	4.55496	ENE	65	0.433182	1.149	5.043	4.58055	2.50048	10.9513	1.22381	1.11659	4.46916
29	146.78	119.739	25.6376	63.12	-0.853	0.0563673	0.704172	0.506	1.246	0.086	0.938	147	5.60574	4.55496	ENE	65	0.433182	1.149	5.043	4.58055	2.50048	10.9513	1.22381	1.11659	4.46916
29	146.78	119.739	25.6376	65.24	-1.01	0.0563673	0.704172	0.506	1.246	0.086	0.938	147	5.60574	4.55496	ENE	65	0.433182	1.149	5.043	4.58055	2.50048	10.9513	1.22381	1.11659	4.46916
29	146.78	119.739	25.6376	67.18	-1.198	0.0563673	0.704172	0.506	1.246	0.086	0.938	147	5.60574	4.55496	ENE	65	0.433182	1.149	5.043	4.58055	2.50048	10.9513	1.22381	1.11659	4.46916
29	146.78	119.739	25.6376	69.34	-1.36	0.0563673	0.704172	0.506	1.246	0.086	0.938	147	5.60574	4.55496	ENE	65	0.433182	1.149	5.043	4.58055	2.50048	10.9513	1.22381	1.11659	4.46916
29	146.78	119.739	25.6376	71.21	-1.5	0.0563673	0.704172	0.506	1.246	0.086	0.938	147	5.60574	4.55496	ENE	65	0.433182	1.149	5.043	4.58055	2.50048	10.9513	1.22381	1.11659	4.46916
29	146.78	119.739	25.6376	73.36	-1.656	0.0563673	0.704172	0.506	1.246	0.086	0.938	147	5.60574	4.55496	ENE	65	0.433182	1.149	5.043	4.58055	2.50048	10.9513	1.22381	1.11659	4.46916
29	146.78	119.739	25.6377	75.82	-1.76	0.0563673	0.704172	0.506	1.246	0.086	0.938	147	5.60574	4.55496	ENE	65	0.433182	1.149	5.043	4.58055	2.50048	10.9513	1.22381	1.11659	4.46916
29	146.78	119.739	25.6377	78.39	-1.874	0.0563673	0.704172	0.506	1.246	0.086	0.938	147	5.60574	4.55496	ENE	65	0.433182	1.149	5.043	4.58055	2.50048	10.9513	1.22381	1.11659	4.46916
29	146.78	119.739	25.6377	81.34	-2.021	0.0563673	0.704172	0.506	1.246	0.086	0.938	147	5.60574	4.55496	ENE	65	0.433182	1.149	5.043	4.58055	2.50048	10.9513	1.22381	1.11659	4.46916
29	146.78	119.739	25.6377	85.09	-2.176	0.0563673	0.704172	0.506	1.246	0.086	0.938	147	5.60574	4.55496	ENE	65	0.433182	1.149	5.043	4.58055	2.50048	10.9513	1.22381	1.11659	4.46916
29	146.78	119.739	25.6378	88.42	-2.302	0.0563673	0.704172	0.506	1.246	0.086	0.938	147	5.60574	4.55496	ENE	65	0.433182	1.149	5.043	4.58055	2.50048	10.9513	1.22381	1.11659	4.46916
15	167.21	119.743	25.63	0	2.732	0.0307698	1.07421	-0.103275	1.01766	-0.221046	0.901966	147	5.60574	4.55496	ENE	65	0.433182	1.149	5.043	4.58055	1.67275	16.3704	1.22381	1.11659	4.46916
15	167.21	119.743	25.63	2.01	2.482	0.0307698	1.07421	-0.103275	1.01766	-0.221046	0.901966	147	5.60574	4.55496	ENE	65	0.433182	1.149	5.043	4.58055	1.67275	16.3704	1.22381	1.11659	4.46916
15	167.21	119.743	25.63	3.98	2.212	0.0307698	1.07421	-0.103275	1.01766	-0.221046	0.901966	147	5.60574	4.55496	ENE	65	0.433182	1.149	5.043	4.58055	1.67275	16.3704	1.22381	1.11659	4.46916
15	167.21	119.743	25.63	6	1.963	0.0307698	1.07421	-0.103275	1.01766	-0.221046	0.901966	147	5.60574	4.55496	ENE	65	0.433182	1.149	5.043	4.58055	1.67275	16.3704	1.22381	1.11659	4.46916
15	167.21	119.743	25.6301	8.08	1.705	0.0307698	1.07421	-0.103275	1.01766	-0.221046	0.901966	147	5.60574	4.55496	ENE	65	0.433182	1.149	5.043	4.58055	1.67275	16.3704	1.22381	1.11659	4.46916
15	167.21	119.743	25.6301	9.97	1.508	0.0307698	1.07421	-0.103275	1.01766	-0.221046	0.901966	147	5.60574	4.55496	ENE	65	0.433182	1.149	5.043	4.58055	1.67275	16.3704	1.22381	1.11659	4.46916
15	167.21	119.743	25.6301	11.22	1.37	0.0307698	1.07421	-0.103275	1.01766	-0.221046	0.901966	147	5.60574	4.55496	ENE	65	0.433182	1.149	5.043	4.58055	1.67275	16.3704	1.22381	1.11659	4.46916
15	167.21	119.744	25.6301	13	1.181	0.0307698	1.07421	-0.103275	1.01766	-0.221046	0.901966	147	5.60574	4.55496	ENE	65	0.433182	1.149	5.043	4.58055	1.67275	16.3704	1.22381	1.11659	4.46916
15	167.21	119.744	25.6301	14.29	1.01	0.0307698	1.07421	-0.103275	1.01766	-0.221046	0.901966	147	5.60574	4.55496	ENE	65	0.433182	1.149	5.043	4.58055	1.67275	16.3704	1.22381	1.11659	4.46916
15	167.21	119.744	25.6301	15.89	0.876	0.0307698	1.07421	-0.103275	1.01766	-0.221046	0.901966	147	5.60574	4.55496	ENE	65	0.433182	1.149	5.043	4.58055	1.67275	16.3704	1.22381	1.11659	4.46916
15	167.21	119.744	25.6301	18.02	0.729	0.0307698	1.07421	-0.103275	1.01766	-0.221046	0.901966	147	5.60574	4.55496	ENE	65	0.433182	1.149	5.043	4.58055	1.67275	16.3704	1.22381	1.11659	4.46916
15	167.21	119.744	25.6302	21.55	0.628	0.0307698	1.07421	-0.103275	1.01766	-0.221046	0.901966	147	5.60574	4.55496	ENE	65	0.433182	1.149	5.043	4.58055	1.67275	16.3704	1.22381	1.11659	4.46916
15	167.21	119.744	25.6302	26.87	0.515	0.0307698	1.07421	-0.103275	1.01766	-0.221046	0.901966	147	5.60574	4.55496	ENE	65	0.433182	1.149	5.043	4.58055	1.67275	16.3704	1.22381	1.11659	4.46916
15	167.21	119.744	25.6303	34.07	0.34	0.0307698	1.07421	-0.103275	1.01766	-0.221046	0.901966	147	5.60574	4.55496	ENE	65	0.433182	1.149	5.043	4.58055	1.67275	16.3704	1.22381	1.11659	4.46916
15	167.21	119.744	25.6303	40.81	0.241	0.0307698	1.07421	-0.103275	1.01766	-0.221046	0.901966	147	5.60574	4.55496	ENE	65	0.433182	1.149	5.043	4.58055	1.67275	16.3704	1.22381	1.11659	4.46916
15	167.21	119.744	25.6304	49.07	0.114	0.0307698	1.07421	-0.103275	1.01766	-0.221046	0.901966	147	5.60574	4.55496	ENE	65	0.433182	1.149	5.043	4.58055	1.67275	16.3704	1.22381	1.11659	4.46916
15	167.21	119.744	25.6305	56.02	-0.003	0.0307698	1.07421	-0.103275	1.01766	-0.221046	0.901966	147	5.60574	4.55496	ENE	65	0.433182	1.149	5.043	4.58055	1.67275	16.3704	1.22381	1.11659	4.46916
15	167.21	119.744	25.6306	64.85	-0.139	0.0307698	1.07421	-0.103275	1.01766	-0.221046	0.901966	147	5.60574	4.55496	ENE	65	0.433182	1.149	5.043	4.58055	1.67275	16.3704	1.22381	1.11659	4.46916
15	167.21	119.744	25.6306	72.51	-0.257	0.0307698	1.07421	-0.103275	1.01766	-0.221046	0.901966	147	5.60574	4.55496	ENE	65	0.433182	1.149	5.043	4.58055	1.67275	16.3704	1.22381	1.11659	4.46916
15	167.21	119.744	25.6307	80.2	-0.401	0.0307698	1.07421	-0.103275	1.01766	-0.221046	0.901966	147	5.60574	4.55496	ENE	65	0.433182	1.149	5.043	4.58055	1.67275	16.3704	1.22381	1.11659	4.46916
15	167.21	119.744	25.6308	88.28	-0.594	0.0307698	1.07421	-0.103275	1.01766	-0.221046	0.901966	147	5.60574	4.55496	ENE	65	0.433182	1.149	5.043	4.58055	1.67275	16.3704	1.22381	1.11659	4.46916
15	167.21	119.744	25.6308	93.89	-0.711	0.0307698	1.07421	-0.103275	1.01766	-0.221046	0.901966	147	5.60574	4.55496	ENE	65	0.433182	1.149	5.043	4.58055	1.67275	16.3704	1.22381	1.11659	4.46916
15	167.21	119.744	25.6309	100.02	-0.834	0.0307698	1.07421	-0.103275	1.01766	-0.221046	0.901966	147	5.60574	4.55496	ENE	65	0.433182	1.149	5.043	4.58055	1.67275	16.3704	1.22381	1.11659	4.46916
15	167.21	119.744	25.6309	105.58	-0.968	0.0307698	1.07421	-0.103275	1.01766	-0.221046	0.901966	147	5.60574	4.55496	ENE	65	0.433182	1.149	5.043	4.58055	1.67275	16.3704	1.22381	1.11659	4.46916
15	167.21	119.744	25.631	111.72	-1.096	0.0307698	1.07421	-0.103275	1.01766	-0.221046	0.901966	147	5.60574	4.55496	ENE	65	0.433182	1.149	5.043	4.58055	1.67275	16.3704	1.22381	1.11659	4.46916
15	167.21	119.744	25.631	116.85	-1.207	0.0307698	1.07421	-0.103275	1.01766	-0.221046	0.901966	147	5.60574	4.55496	ENE	65	0.433182	1.149	5.043	4.58055	1.67275	16.3704	1.22381	1.11659	4.46916
15	167.21	119.744	25.6311	123.78	-1.357	0.0307698	1.07421	-0.103275	1.01766	-0.221046	0.901966	147	5.60574	4.55496	ENE	65	0.433182	1.149	5.043	4.58055	1.67275	16.3704	1.22381	1.11659	4.46916
15	167.21	119.744	25.6312	134.84	-1.417	0.0307698	1.07421	-0.103275	1.01766	-0.221046	0.901966	147	5.60574	4.55496	ENE	65	0.433182	1.149	5.043	4.58055	1.67275	16.3704	1.22381	1.11659	4.46916
258	66.3	119.748	25.6378	0	2.582	0.0987407	1.56886	-0.64972	1.39832	0.225539	0.580496	147	5.60574	4.55496	ENE	65	0.433182	1.149	5.043	4.58055	1.2089	22.6516	1.22381	1.11659	4.46916
258	66.3	119.748	25.6378	2.05	2.306	0.0987407	1.56886	-0.64972	1.39832	0.225539	0.580496	147	5.60574	4.55496	ENE	65	0.433182	1.149	5.043	4.58055	1.2089	22.6516	1.22381	1.11659	4.46916
258	66.3	119.748	25.6378	4.15	1.996	0.0987407	1.56886	-0.64972	1.39832	0.225539	0.580496	147	5.60574	4.55496	ENE	65	0.433182	1.149	5.043	4.58055	1.2089	22.6516	1.22381	1.11659	4.46916
258	66.3	119.748	25.6378	6.08	1.734	0.0987407	1.56886	-0.64972	1.39832	0.225539	0.580496	147	5.60574	4.55496	ENE	65	0.433182	1.149	5.043	4.58055	1.2089	22.6516	1.22381	1.11659	4.46916
258	66.3	119.748	25.6378	8.46	1.438	0.0987407	1.56886	-0.64972	1.39832	0.225539	0.580496	147	5.60574	4.55496	ENE	65	0.433182	1.149	5.043	4.58055	1.2089	22.6516	1.22381	1.11659	4.46916
258	66.3	119.748	25.6378	10.96	1.14	0.0987407	1.56886	-0.64972	1.39832	0.225539	0.580496	147	5.60574	4.55496	ENE	65	0.433182	1.149	5.043	4.58055	1.2089	22.6516	1.22381	1.11659	4.46916
258	66.3	119.748	25.6378	13.52	0.852	0.0987407	1.56886	-0.64972	1.39832	0.225539	0.580496	147	5.60574	4.55496	ENE	65	0.433182	1.149	5.043	4.58055	1.2089	22.6516	1.22381	1.11659	4.46916
258	66.3	119.748	25.6378	16.42	0.553	0.0987407	1.56886	-0.64972	1.39832	0.225539	0.580496	147	5.60574	4.55496	ENE	65	0.433182	1.149	5.043	4.58055	1.2089	22.6516	1.22381	1.11659	4.46916
258	66.3	119.748	25.6378	19.1	0.341	0.0987407	1.56886	-0.64972	1.39832	0.225539	0.580496	147	5.60574	4.55496	ENE	65	0.433182	1.149	5.043	4.58055	1.2089	22.6516	1.22381	1.11659	4.46916
258	66.3	119.748	25.6378	21.8	0.041	0.0987407	1.56886	-0.64972	1.39832	0.225539	0.580496	147	5.60574	4.55496	ENE	65	0.433182	1.149	5.043	4.58055	1.2089	22.6516	1.22381	1.11659	4.46916
258	66.3	119.748	25.6377	24.25	-0.154	0.0987407	1.56886	-0.64972	1.39832	0.225539	0.580496	147	5.60574	4.55496	ENE	65	0.433182	1.149	5.043	4.58055	1.2089	22.6516	1.22381	1.11659	4.46916
258	66.3	119.748	25.6377	26.9	-0.392	0.0987407	1.56886	-0.64972	1.39832	0.225539	0.580496	147	5.60574	4.55496	ENE	65	0.433182	1.149	5.043	4.58055	1.2089	22.6516	1.22381	1.11659	4.46916
258	66.3	119.748	25.6377	28.96	-0.537	0.0987407	1.56886	-0.64972	1.39832	0.225539	0.580496	147	5.60574	4.55496	ENE	65	0.433182	1.149	5.043	4.58055	1.2089	22.6516	1.22381	1.11659	4.46916
258	66.3	119.748	25.6377	31.3	-0.708	0.0987407	1.56886	-0.64972	1.39832	0.225539	0.580496	147	5.60574	4.55496	ENE	65	0.433182	1.149	5.043	4.58055	1.2089	22.6516	1.22381	1.11659	4.46916
258	66.3	119.748	25.6377	33.71	-0.89	0.0987407	1.56886	-0.64972	1.39832	0.225539	0.580496	147	5.60574	4.55496	ENE	65	0.433182	1.149	5.043	4.58055	1.2089	22.6516	1.22381	1.11659	4.46916
258	66.3	119.748	25.6377	36.48	-1.096	0.0987407	1.56886	-0.64972	1.39832	0.225539	0.580496	147	5.60574	4.55496	ENE	65	0.433182	1.149	5.043	4.58055	1.2089	22.6516	1.22381	1.11659	4.46916
258	66.3	119.748	25.6377	39.12	-1.357	0.0987407	1.56886	-0.64972	1.39832	0.225539	0.580496	147	5.60574	4.55496	ENE	65	0.433182	1.149	5.043	4.58055	1.2089	22.6516	1.22381	1.11659	4.46916
258	66.3	119.748	25.6377	40.5	-1.417	0.0987407	1.56886	-0.64972	1.39832	0.225539	0.580496	147	5.60574	4.55496	ENE	65	0.433182	1.149	5.043	4.58055	1.2089	22.6516	1.22381	1.11659	4.46916
348	146.53	119.769	25.6593	0	2.774	0.0770202	0.316295	1.66066	0.931171	-0.48798	1.60097	147	5.60574	4.55496	ENE	65	0.433182	1.149	5.043	4.58055	6.18487	4.42751	1.22381	1.11659	4.46916
348	146.53	119.769	25.6593	3.35	2.479	0.0770202	0.316295	1.66066	0.931171	-0.48798	1.60097	147	5.60574	4.55496	ENE	65	0.433182	1.149	5.043	4.58055	6.18487	4.42751	1.22381	1.11659	4.46916
348	146.53	119.769	25.6593	6.2	2.22	0.0770202	0.316295	1.66066	0.931171	-0.48798	1.60097	147	5.60574	4.55496	ENE	65	0.433182	1.149	5.043	4.58055	6.18487	4.42751	1.22381	1.11659	4.46916
348	146.53	119.769	25.6594	9.22	1.939	0.0770202	0.316295	1.66066	0.931171	-0.48798	1.60097	147	5.60574	4.55496	ENE	65	0.433182	1.149	5.043	4.58055	6.18487	4.42751	1.22381	1.11659	4.46916
348	146.53	119.769	25.6594	12.24	1.665	0.0770202	0.316295	1.66066	0.931171	-0.48798	1.60097	147	5.60574	4.55496	ENE	65	0.433182	1.149	5.043	4.58055	6.18487	4.42751	1.22381	1.11659	4.46916
348	146.53	119.769	25.6594	14.79	1.394	0.0770202	0.316295	1.66066	0.931171	-0.48798	1.60097	147	5.60574	4.55496	ENE	65	0.433182	1.149	5.043	4.58055	6.18487	4.42751	1.22381	1.11659	4.46916
348	146.53	119.769	25.6594	17.73	1.141	0.0770202	0.316295	1.66066	0.931171	-0.48798	1.60097	147	5.60574	4.55496	ENE	65	0.433182	1.149	5.043	4.58055	6.18487	4.42751	1.22381	1.11659	4.46916
348	146.53	119.769	25.6595	19.85	0.974	0.0770202	0.316295	1.66066	0.931171	-0.48798	1.60097	147	5.60574	4.55496	ENE	65	0.433182	1.149	5.043	4.58055	6.18487	4.42751	1.22381	1.11659	4.46916
348	146.53	119.769	25.6595	23.06	0.711	0.0770202	0.316295	1.66066	0.931171	-0.48798	1.60097	147	5.60574	4.55496	ENE	65	0.433182	1.149	5.043	4.58055	6.18487	4.42751	1.22381	1.11659	4.46916
348	146.53	119.769	25.6595	26.65	0.435	0.0770202	0.316295	1.66066	0.931171	-0.48798	1.60097	147	5.60574	4.55496	ENE	65	0.433182	1.149	5.043	4.58055	6.18487	4.42751	1.22381	1.11659	4.46916
348	146.53	119.769	25.6596	29.93	0.156	0.0770202	0.316295	1.66066	0.931171	-0.48798	1.60097	147	5.60574	4.55496	ENE	65	0.433182	1.149	5.043	4.58055	6.18487	4.42751	1.22381	1.11659	4.46916
348	146.53	119.769	25.6596	32.99	-0.073	0.0770202	0.316295	1.66066	0.931171	-0.48798	1.60097	147	5.60574	4.55496	ENE	65	0.433182	1.149	5.043	4.58055	6.18487	4.42751	1.22381	1.11659	4.46916
348	146.53	119.769	25.6596	36.4	-0.357	0.0770202	0.316295	1.66066	0.931171	-0.48798	1.60097	147	5.60574	4.55496	ENE	65	0.433182	1.149	5.043	4.58055	6.18487	4.42751	1.22381	1.11659	4.46916
348	146.53	119.769	25.6596	39.53	-0.611	0.0770202	0.316295	1.66066	0.931171	-0.48798	1.60097	147	5.60574	4.55496	ENE	65	0.433182	1.149	5.043	4.58055	6.18487	4.42751	1.22381	1.11659	4.46916
348	146.53	119.769	25.6597	42.99	-0.856	0.0770202	0.316295	1.66066	0.931171	-0.48798	1.60097	147	5.60574	4.55496	ENE	65	0.433182	1.149	5.043	4.58055	6.18487	4.42751	1.22381	1.11659	4.46916
348	146.53	119.768	25.6597	46.79	-1.126	0.0770202	0.316295	1.66066	0.931171	-0.48798	1.60097	147	5.60574	4.55496	ENE	65	0.433182	1.149	5.043	4.58055	6.18487	4.42751	1.22381	1.11659	4.46916
348	146.53	119.768	25.6597	50.3	-1.395	0.0770202	0.316295	1.66066	0.931171	-0.48798	1.60097	147	5.60574	4.55496	ENE	65	0.433182	1.149	5.043	4.58055	6.18487	4.42751	1.22381	1.11659	4.46916
348	146.53	119.768	25.6598	54.33	-1.69	0.0770202	0.316295	1.66066	0.931171	-0.48798	1.60097	147	5.60574	4.55496	ENE	65	0.433182	1.149	5.043	4.58055	6.18487	4.42751	1.22381	1.11659	4.46916
348	146.53	119.768	25.6598	58.13	-1.945	0.0770202	0.316295	1.66066	0.931171	-0.48798	1.60097	147	5.60574	4.55496	ENE	65	0.433182	1.149	5.043	4.58055	6.18487	4.42751	1.22381	1.11659	4.46916
348	146.53	119.768	25.6598	60.56	-2.112	0.0770202	0.316295	1.66066	0.931171	-0.48798	1.60097	147	5.60574	4.55496	ENE	65	0.433182	1.149	5.043	4.58055	6.18487	4.42751	1.22381	1.11659	4.46916
348	146.53	119.768	25.6599	64.26	-2.328	0.0770202	0.316295	1.66066	0.931171	-0.48798	1.60097	147	5.60574	4.55496	ENE	65	0.433182	1.149	5.043	4.58055	6.18487	4.42751	1.22381	1.11659	4.46916
348	146.53	119.768	25.6599	67.6	-2.538	0.0770202	0.316295	1.66066	0.931171	-0.48798	1.60097	147	5.60574	4.55496	ENE	65	0.433182	1.149	5.043	4.58055	6.18487	4.42751	1.22381	1.11659	4.46916
348	146.53	119.768	25.6599	71.28	-2.716	0.0770202	0.316295	1.66066	0.931171	-0.48798	1.60097	147	5.60574	4.55496	ENE	65	0.433182	1.149	5.043	4.58055	6.18487	4.42751	1.22381	1.11659	4.46916
315	133.6	119.776	25.6635	0	2.694	0.0505046	0.389537	1.36017	0.549685	-0.0049508	0.944617	147	5.60574	4.55496	ENE	65	0.433182	1.149	5.043	4.58055	4.78517	5.72259	1.22381	1.11659	4.46916
315	133.6	119.776	25.6635	2.19	2.484	0.0505046	0.389537	1.36017	0.549685	-0.0049508	0.944617	147	5.60574	4.55496	ENE	65	0.433182	1.149	5.043	4.58055	4.78517	5.72259	1.22381	1.11659	4.46916
315	133.6	119.776	25.6635	4.42	2.29	0.0505046	0.389537	1.36017	0.549685	-0.0049508	0.944617	147	5.60574	4.55496	ENE	65	0.433182	1.149	5.043	4.58055	4.78517	5.72259	1.22381	1.11659	4.46916
315	133.6	119.776	25.6635	6.77	2.042	0.0505046	0.389537	1.36017	0.549685	-0.0049508	0.944617	147	5.60574	4.55496	ENE	65	0.433182	1.149	5.043	4.58055	4.78517	5.72259	1.22381	1.11659	4.46916
315	133.6	119.776	25.6636	9.7	1.794	0.0505046	0.389537	1.36017	0.549685	-0.0049508	0.944617	147	5.60574	4.55496	ENE	65	0.433182	1.149	5.043	4.58055	4.78517	5.72259	1.22381	1.11659	4.46916
315	133.6	119.776	25.6636	12.53	1.581	0.0505046	0.389537	1.36017	0.549685	-0.0049508	0.944617	147	5.60574	4.55496	ENE	65	0.433182	1.149	5.043	4.58055	4.78517	5.72259	1.22381	1.11659	4.46916
315	133.6	119.776	25.6636	15.56	1.343	0.0505046	0.389537	1.36017	0.549685	-0.0049508	0.944617	147	5.60574	4.55496	ENE	65	0.433182	1.149	5.043	4.58055	4.78517	5.72259	1.22381	1.11659	4.46916
315	133.6	119.776	25.6636	18.65	1.097	0.0505046	0.389537	1.36017	0.549685	-0.0049508	0.944617	147	5.60574	4.55496	ENE	65	0.433182	1.149	5.043	4.58055	4.78517	5.72259	1.22381	1.11659	4.46916
315	133.6	119.776	25.6636	21.79	0.912	0.0505046	0.389537	1.36017	0.549685	-0.0049508	0.944617	147	5.60574	4.55496	ENE	65	0.433182	1.149	5.043	4.58055	4.78517	5.72259	1.22381	1.11659	4.46916
315	133.6	119.776	25.6637	25.55	0.687	0.0505046	0.389537	1.36017	0.549685	-0.0049508	0.944617	147	5.60574	4.55496	ENE	65	0.433182	1.149	5.043	4.58055	4.78517	5.72259	1.22381	1.11659	4.46916
315	133.6	119.776	25.6637	30.72	0.443	0.0505046	0.389537	1.36017	0.549685	-0.0049508	0.944617	147	5.60574	4.55496	ENE	65	0.433182	1.149	5.043	4.58055	4.78517	5.72259	1.22381	1.11659	4.46916
315	133.6	119.776	25.6637	35.21	0.239	0.0505046	0.389537	1.36017	0.549685	-0.0049508	0.944617	147	5.60574	4.55496	ENE	65	0.433182	1.149	5.043	4.58055	4.78517	5.72259	1.22381	1.11659	4.46916
315	133.6	119.776	25.6637	39.68	0.005	0.0505046	0.389537	1.36017	0.549685	-0.0049508	0.944617	147	5.60574	4.55496	ENE	65	0.433182	1.149	5.043	4.58055	4.78517	5.72259	1.22381	1.11659	4.46916
315	133.6	119.776	25.6638	43.53	-0.177	0.0505046	0.389537	1.36017	0.549685	-0.0049508	0.944617	147	5.60574	4.55496	ENE	65	0.433182	1.149	5.043	4.58055	4.78517	5.72259	1.22381	1.11659	4.46916
315	133.6	119.776	25.6638	47.93	-0.354	0.0505046	0.389537	1.36017	0.549685	-0.0049508	0.944617	147	5.60574	4.55496	ENE	65	0.433182	1.149	5.043	4.58055	4.78517	5.72259	1.22381	1.11659	4.46916
315	133.6	119.776	25.6638	53.27	-0.593	0.0505046	0.389537	1.36017	0.549685	-0.0049508	0.944617	147	5.60574	4.55496	ENE	65	0.433182	1.149	5.043	4.58055	4.78517	5.72259	1.22381	1.11659	4.46916
315	133.6	119.776	25.6639	57.43	-0.726	0.0505046	0.389537	1.36017	0.549685	-0.0049508	0.944617	147	5.60574	4.55496	ENE	65	0.433182	1.149	5.043	4.58055	4.78517	5.72259	1.22381	1.11659	4.46916
315	133.6	119.776	25.6639	61.14	-0.898	0.0505046	0.389537	1.36017	0.549685	-0.0049508	0.944617	147	5.60574	4.55496	ENE	65	0.433182	1.149	5.043	4.58055	4.78517	5.72259	1.22381	1.11659	4.46916
315	133.6	119.776	25.6639	65.41	-1.077	0.0505046	0.389537	1.36017	0.549685	-0.0049508	0.944617	147	5.60574	4.55496	ENE	65	0.433182	1.149	5.043	4.58055	4.78517	5.72259	1.22381	1.11659	4.46916
315	133.6	119.776	25.6639	70.52	-1.296	0.0505046	0.389537	1.36017	0.549685	-0.0049508	0.944617	147	5.60574	4.55496	ENE	65	0.433182	1.149	5.043	4.58055	4.78517	5.72259	1.22381	1.11659	4.46916
315	133.6	119.775	25.664	75.13	-1.491	0.0505046	0.389537	1.36017	0.549685	-0.0049508	0.944617	147	5.60574	4.55496	ENE	65	0.433182	1.149	5.043	4.58055	4.78517	5.72259	1.22381	1.11659	4.46916
315	133.6	119.775	25.664	80.52	-1.685	0.0505046	0.389537	1.36017	0.549685	-0.0049508	0.944617	147	5.60574	4.55496	ENE	65	0.433182	1.149	5.043	4.58055	4.78517	5.72259	1.22381	1.11659	4.46916
315	133.6	119.775	25.664	86.61	-1.933	0.0505046	0.389537	1.36017	0.549685	-0.0049508	0.944617	147	5.60574	4.55496	ENE	65	0.433182	1.149	5.043	4.58055	4.78517	5.72259	1.22381	1.11659	4.46916
315	133.6	119.775	25.6641	92.42	-2.156	0.0505046	0.389537	1.36017	0.549685	-0.0049508	0.944617	147	5.60574	4.55496	ENE	65	0.433182	1.149	5.043	4.58055	4.78517	5.72259	1.22381	1.11659	4.46916
315	133.6	119.775	25.6641	96.66	-2.32	0.0505046	0.389537	1.36017	0.549685	-0.0049508	0.944617	147	5.60574	4.55496	ENE	65	0.433182	1.149	5.043	4.58055	4.78517	5.72259	1.22381	1.11659	4.46916
315	133.6	119.775	25.6641	101.74	-2.508	0.0505046	0.389537	1.36017	0.549685	-0.0049508	0.944617	147	5.60574	4.55496	ENE	65	0.433182	1.149	5.043	4.58055	4.78517	5.72259	1.22381	1.11659	4.46916
315	133.6	119.775	25.6642	107.02	-2.711	0.0505046	0.389537	1.36017	0.549685	-0.0049508	0.944617	147	5.60574	4.55496	ENE	65	0.433182	1.149	5.043	4.58055	4.78517	5.72259	1.22381	1.11659	4.46916
58	339.74	119.775	25.6225	0	2.722	0.0176351	0.26739	1.90298	0.91922	-0.508857	1.75063	151	5.58227	4.52	NE	50	0.36589	1.641	4.689	3.92577	8.54481	3.55605	1.42196	1.31632	4.67968
58	339.74	119.775	25.6225	4.9	2.628	0.0176351	0.26739	1.90298	0.91922	-0.508857	1.75063	151	5.58227	4.52	NE	50	0.36589	1.641	4.689	3.92577	8.54481	3.55605	1.42196	1.31632	4.67968
58	339.74	119.776	25.6225	9.76	2.536	0.0176351	0.26739	1.90298	0.91922	-0.508857	1.75063	151	5.58227	4.52	NE	50	0.36589	1.641	4.689	3.92577	8.54481	3.55605	1.42196	1.31632	4.67968
58	339.74	119.776	25.6226	15.06	2.427	0.0176351	0.26739	1.90298	0.91922	-0.508857	1.75063	151	5.58227	4.52	NE	50	0.36589	1.641	4.689	3.92577	8.54481	3.55605	1.42196	1.31632	4.67968
58	339.74	119.776	25.6226	19.97	2.289	0.0176351	0.26739	1.90298	0.91922	-0.508857	1.75063	151	5.58227	4.52	NE	50	0.36589	1.641	4.689	3.92577	8.54481	3.55605	1.42196	1.31632	4.67968
58	339.74	119.776	25.6226	24.75	2.175	0.0176351	0.26739	1.90298	0.91922	-0.508857	1.75063	151	5.58227	4.52	NE	50	0.36589	1.641	4.689	3.92577	8.54481	3.55605	1.42196	1.31632	4.67968
58	339.74	119.776	25.6226	29.63	2.057	0.0176351	0.26739	1.90298	0.91922	-0.508857	1.75063	151	5.58227	4.52	NE	50	0.36589	1.641	4.689	3.92577	8.54481	3.55605	1.42196	1.31632	4.67968
58	339.74	119.776	25.6227	34.68	1.928	0.0176351	0.26739	1.90298	0.91922	-0.508857	1.75063	151	5.58227	4.52	NE	50	0.36589	1.641	4.689	3.92577	8.54481	3.55605	1.42196	1.31632	4.67968
58	339.74	119.776	25.6227	39.81	1.896	0.0176351	0.26739	1.90298	0.91922	-0.508857	1.75063	151	5.58227	4.52	NE	50	0.36589	1.641	4.689	3.92577	8.54481	3.55605	1.42196	1.31632	4.67968
58	339.74	119.776	25.6227	44.86	1.775	0.0176351	0.26739	1.90298	0.91922	-0.508857	1.75063	151	5.58227	4.52	NE	50	0.36589	1.641	4.689	3.92577	8.54481	3.55605	1.42196	1.31632	4.67968
58	339.74	119.776	25.6227	50.15	1.679	0.0176351	0.26739	1.90298	0.91922	-0.508857	1.75063	151	5.58227	4.52	NE	50	0.36589	1.641	4.689	3.92577	8.54481	3.55605	1.42196	1.31632	4.67968
58	339.74	119.776	25.6228	55.65	1.584	0.0176351	0.26739	1.90298	0.91922	-0.508857	1.75063	151	5.58227	4.52	NE	50	0.36589	1.641	4.689	3.92577	8.54481	3.55605	1.42196	1.31632	4.67968
58	339.74	119.776	25.6228	61.14	1.494	0.0176351	0.26739	1.90298	0.91922	-0.508857	1.75063	151	5.58227	4.52	NE	50	0.36589	1.641	4.689	3.92577	8.54481	3.55605	1.42196	1.31632	4.67968
58	339.74	119.776	25.6228	66.55	1.416	0.0176351	0.26739	1.90298	0.91922	-0.508857	1.75063	151	5.58227	4.52	NE	50	0.36589	1.641	4.689	3.92577	8.54481	3.55605	1.42196	1.31632	4.67968
58	339.74	119.776	25.6228	71.7	1.341	0.0176351	0.26739	1.90298	0.91922	-0.508857	1.75063	151	5.58227	4.52	NE	50	0.36589	1.641	4.689	3.92577	8.54481	3.55605	1.42196	1.31632	4.67968
58	339.74	119.776	25.6229	78.25	1.239	0.0176351	0.26739	1.90298	0.91922	-0.508857	1.75063	151	5.58227	4.52	NE	50	0.36589	1.641	4.689	3.92577	8.54481	3.55605	1.42196	1.31632	4.67968
58	339.74	119.776	25.6229	84	1.054	0.0176351	0.26739	1.90298	0.91922	-0.508857	1.75063	151	5.58227	4.52	NE	50	0.36589	1.641	4.689	3.92577	8.54481	3.55605	1.42196	1.31632	4.67968
58	339.74	119.776	25.6229	89.63	1.028	0.0176351	0.26739	1.90298	0.91922	-0.508857	1.75063	151	5.58227	4.52	NE	50	0.36589	1.641	4.689	3.92577	8.54481	3.55605	1.42196	1.31632	4.67968
58	339.74	119.776	25.6229	95.39	0.936	0.0176351	0.26739	1.90298	0.91922	-0.508857	1.75063	151	5.58227	4.52	NE	50	0.36589	1.641	4.689	3.92577	8.54481	3.55605	1.42196	1.31632	4.67968
58	339.74	119.776	25.623	101.03	0.841	0.0176351	0.26739	1.90298	0.91922	-0.508857	1.75063	151	5.58227	4.52	NE	50	0.36589	1.641	4.689	3.92577	8.54481	3.55605	1.42196	1.31632	4.67968
58	339.74	119.776	25.623	106.65	0.734	0.0176351	0.26739	1.90298	0.91922	-0.508857	1.75063	151	5.58227	4.52	NE	50	0.36589	1.641	4.689	3.92577	8.54481	3.55605	1.42196	1.31632	4.67968
58	339.74	119.776	25.623	111.8	0.662	0.0176351	0.26739	1.90298	0.91922	-0.508857	1.75063	151	5.58227	4.52	NE	50	0.36589	1.641	4.689	3.92577	8.54481	3.55605	1.42196	1.31632	4.67968
58	339.74	119.776	25.623	117.06	0.568	0.0176351	0.26739	1.90298	0.91922	-0.508857	1.75063	151	5.58227	4.52	NE	50	0.36589	1.641	4.689	3.92577	8.54481	3.55605	1.42196	1.31632	4.67968
58	339.74	119.776	25.6231	122.56	0.465	0.0176351	0.26739	1.90298	0.91922	-0.508857	1.75063	151	5.58227	4.52	NE	50	0.36589	1.641	4.689	3.92577	8.54481	3.55605	1.42196	1.31632	4.67968
58	339.74	119.777	25.6231	128.02	0.342	0.0176351	0.26739	1.90298	0.91922	-0.508857	1.75063	151	5.58227	4.52	NE	50	0.36589	1.641	4.689	3.92577	8.54481	3.55605	1.42196	1.31632	4.67968
58	339.74	119.777	25.6231	133.72	0.257	0.0176351	0.26739	1.90298	0.91922	-0.508857	1.75063	151	5.58227	4.52	NE	50	0.36589	1.641	4.689	3.92577	8.54481	3.55605	1.42196	1.31632	4.67968
58	339.74	119.777	25.6232	139.3	0.157	0.0176351	0.26739	1.90298	0.91922	-0.508857	1.75063	151	5.58227	4.52	NE	50	0.36589	1.641	4.689	3.92577	8.54481	3.55605	1.42196	1.31632	4.67968
58	339.74	119.777	25.6232	144.86	0.059	0.0176351	0.26739	1.90298	0.91922	-0.508857	1.75063	151	5.58227	4.52	NE	50	0.36589	1.641	4.689	3.92577	8.54481	3.55605	1.42196	1.31632	4.67968
58	339.74	119.777	25.6232	150.54	-0.03	0.0176351	0.26739	1.90298	0.91922	-0.508857	1.75063	151	5.58227	4.52	NE	50	0.36589	1.641	4.689	3.92577	8.54481	3.55605	1.42196	1.31632	4.67968
58	339.74	119.777	25.6232	155.86	-0.108	0.0176351	0.26739	1.90298	0.91922	-0.508857	1.75063	151	5.58227	4.52	NE	50	0.36589	1.641	4.689	3.92577	8.54481	3.55605	1.42196	1.31632	4.67968
58	339.74	119.777	25.6233	161.36	-0.212	0.0176351	0.26739	1.90298	0.91922	-0.508857	1.75063	151	5.58227	4.52	NE	50	0.36589	1.641	4.689	3.92577	8.54481	3.55605	1.42196	1.31632	4.67968
58	339.74	119.777	25.6233	166.57	-0.289	0.0176351	0.26739	1.90298	0.91922	-0.508857	1.75063	151	5.58227	4.52	NE	50	0.36589	1.641	4.689	3.92577	8.54481	3.55605	1.42196	1.31632	4.67968
58	339.74	119.777	25.6233	172.06	-0.383	0.0176351	0.26739	1.90298	0.91922	-0.508857	1.75063	151	5.58227	4.52	NE	50	0.36589	1.641	4.689	3.92577	8.54481	3.55605	1.42196	1.31632	4.67968
58	339.74	119.777	25.6233	177.52	-0.49	0.0176351	0.26739	1.90298	0.91922	-0.508857	1.75063	151	5.58227	4.52	NE	50	0.36589	1.641	4.689	3.92577	8.54481	3.55605	1.42196	1.31632	4.67968
58	339.74	119.777	25.6234	182.49	-0.555	0.0176351	0.26739	1.90298	0.91922	-0.508857	1.75063	151	5.58227	4.52	NE	50	0.36589	1.641	4.689	3.92577	8.54481	3.55605	1.42196	1.31632	4.67968
58	339.74	119.777	25.6234	188.03	-0.643	0.0176351	0.26739	1.90298	0.91922	-0.508857	1.75063	151	5.58227	4.52	NE	50	0.36589	1.641	4.689	3.92577	8.54481	3.55605	1.42196	1.31632	4.67968
58	339.74	119.777	25.6234	193.15	-0.726	0.0176351	0.26739	1.90298	0.91922	-0.508857	1.75063	151	5.58227	4.52	NE	50	0.36589	1.641	4.689	3.92577	8.54481	3.55605	1.42196	1.31632	4.67968
58	339.74	119.777	25.6234	198.68	-0.829	0.0176351	0.26739	1.90298	0.91922	-0.508857	1.75063	151	5.58227	4.52	NE	50	0.36589	1.641	4.689	3.92577	8.54481	3.55605	1.42196	1.31632	4.67968
58	339.74	119.777	25.6235	203.77	-0.933	0.0176351	0.26739	1.90298	0.91922	-0.508857	1.75063	151	5.58227	4.52	NE	50	0.36589	1.641	4.689	3.92577	8.54481	3.55605	1.42196	1.31632	4.67968
58	339.74	119.777	25.6235	209.27	-1.015	0.0176351	0.26739	1.90298	0.91922	-0.508857	1.75063	151	5.58227	4.52	NE	50	0.36589	1.641	4.689	3.92577	8.54481	3.55605	1.42196	1.31632	4.67968
58	339.74	119.777	25.6235	214.68	-1.099	0.0176351	0.26739	1.90298	0.91922	-0.508857	1.75063	151	5.58227	4.52	NE	50	0.36589	1.641	4.689	3.92577	8.54481	3.55605	1.42196	1.31632	4.67968
58	339.74	119.777	25.6235	219.78	-1.204	0.0176351	0.26739	1.90298	0.91922	-0.508857	1.75063	151	5.58227	4.52	NE	50	0.36589	1.641	4.689	3.92577	8.54481	3.55605	1.42196	1.31632	4.67968
58	339.74	119.777	25.6236	224.95	-1.283	0.0176351	0.26739	1.90298	0.91922	-0.508857	1.75063	151	5.58227	4.52	NE	50	0.36589	1.641	4.689	3.92577	8.54481	3.55605	1.42196	1.31632	4.67968
58	339.74	119.777	25.6236	230.11	-1.368	0.0176351	0.26739	1.90298	0.91922	-0.508857	1.75063	151	5.58227	4.52	NE	50	0.36589	1.641	4.689	3.92577	8.54481	3.55605	1.42196	1.31632	4.67968
58	339.74	119.777	25.6236	233.82	-1.435	0.0176351	0.26739	1.90298	0.91922	-0.508857	1.75063	151	5.58227	4.52	NE	50	0.36589	1.641	4.689	3.92577	8.54481	3.55605	1.42196	1.31632	4.67968
58	339.74	119.777	25.6236	236.82	-1.506	0.0176351	0.26739	1.90298	0.91922	-0.508857	1.75063	151	5.58227	4.52	NE	50	0.36589	1.641	4.689	3.92577	8.54481	3.55605	1.42196	1.31632	4.67968
58	339.74	119.777	25.6236	241.21	-1.534	0.0176351	0.26739	1.90298	0.91922	-0.508857	1.75063	151	5.58227	4.52	NE	50	0.36589	1.641	4.689	3.92577	8.54481	3.55605	1.42196	1.31632	4.67968
58	339.74	119.778	25.6237	245.59	-1.605	0.0176351	0.26739	1.90298	0.91922	-0.508857	1.75063	151	5.58227	4.52	NE	50	0.36589	1.641	4.689	3.92577	8.54481	3.55605	1.42196	1.31632	4.67968
58	339.74	119.778	25.6237	250.41	-1.694	0.0176351	0.26739	1.90298	0.91922	-0.508857	1.75063	151	5.58227	4.52	NE	50	0.36589	1.641	4.689	3.92577	8.54481	3.55605	1.42196	1.31632	4.67968
18	175.35	119.848	25.5659	0	2.738	0.0310566	0.220925	2.17837	0.693438	-0.355498	2.26216	152	5.54991	4.48337	NE	50	0.406814	1.916	4.992	3.47035	12.1454	2.73263	1.59924	1.50243	4.81859
18	175.35	119.848	25.5659	5.13	2.614	0.0310566	0.220925	2.17837	0.693438	-0.355498	2.26216	152	5.54991	4.48337	NE	50	0.406814	1.916	4.992	3.47035	12.1454	2.73263	1.59924	1.50243	4.81859
18	175.35	119.848	25.566	10.72	2.454	0.0310566	0.220925	2.17837	0.693438	-0.355498	2.26216	152	5.54991	4.48337	NE	50	0.406814	1.916	4.992	3.47035	12.1454	2.73263	1.59924	1.50243	4.81859
18	175.35	119.848	25.566	16.03	2.334	0.0310566	0.220925	2.17837	0.693438	-0.355498	2.26216	152	5.54991	4.48337	NE	50	0.406814	1.916	4.992	3.47035	12.1454	2.73263	1.59924	1.50243	4.81859
18	175.35	119.848	25.5661	21.38	2.233	0.0310566	0.220925	2.17837	0.693438	-0.355498	2.26216	152	5.54991	4.48337	NE	50	0.406814	1.916	4.992	3.47035	12.1454	2.73263	1.59924	1.50243	4.81859
18	175.35	119.848	25.5661	26.61	2.107	0.0310566	0.220925	2.17837	0.693438	-0.355498	2.26216	152	5.54991	4.48337	NE	50	0.406814	1.916	4.992	3.47035	12.1454	2.73263	1.59924	1.50243	4.81859
18	175.35	119.848	25.5662	33.46	1.935	0.0310566	0.220925	2.17837	0.693438	-0.355498	2.26216	152	5.54991	4.48337	NE	50	0.406814	1.916	4.992	3.47035	12.1454	2.73263	1.59924	1.50243	4.81859
18	175.35	119.848	25.5663	41.03	1.717	0.0310566	0.220925	2.17837	0.693438	-0.355498	2.26216	152	5.54991	4.48337	NE	50	0.406814	1.916	4.992	3.47035	12.1454	2.73263	1.59924	1.50243	4.81859
18	175.35	119.848	25.5663	47.66	1.561	0.0310566	0.220925	2.17837	0.693438	-0.355498	2.26216	152	5.54991	4.48337	NE	50	0.406814	1.916	4.992	3.47035	12.1454	2.73263	1.59924	1.50243	4.81859
18	175.35	119.848	25.5664	55.18	1.369	0.0310566	0.220925	2.17837	0.693438	-0.355498	2.26216	152	5.54991	4.48337	NE	50	0.406814	1.916	4.992	3.47035	12.1454	2.73263	1.59924	1.50243	4.81859
18	175.35	119.848	25.5664	62.67	1.174	0.0310566	0.220925	2.17837	0.693438	-0.355498	2.26216	152	5.54991	4.48337	NE	50	0.406814	1.916	4.992	3.47035	12.1454	2.73263	1.59924	1.50243	4.81859
18	175.35	119.848	25.5665	70.07	0.925	0.0310566	0.220925	2.17837	0.693438	-0.355498	2.26216	152	5.54991	4.48337	NE	50	0.406814	1.916	4.992	3.47035	12.1454	2.73263	1.59924	1.50243	4.81859
18	175.35	119.848	25.5666	76.79	0.772	0.0310566	0.220925	2.17837	0.693438	-0.355498	2.26216	152	5.54991	4.48337	NE	50	0.406814	1.916	4.992	3.47035	12.1454	2.73263	1.59924	1.50243	4.81859
18	175.35	119.848	25.5666	85.51	0.505	0.0310566	0.220925	2.17837	0.693438	-0.355498	2.26216	152	5.54991	4.48337	NE	50	0.406814	1.916	4.992	3.47035	12.1454	2.73263	1.59924	1.50243	4.81859
18	175.35	119.848	25.5667	93.16	0.235	0.0310566	0.220925	2.17837	0.693438	-0.355498	2.26216	152	5.54991	4.48337	NE	50	0.406814	1.916	4.992	3.47035	12.1454	2.73263	1.59924	1.50243	4.81859
18	175.35	119.848	25.5668	100.45	-0.041	0.0310566	0.220925	2.17837	0.693438	-0.355498	2.26216	152	5.54991	4.48337	NE	50	0.406814	1.916	4.992	3.47035	12.1454	2.73263	1.59924	1.50243	4.81859
18	175.35	119.848	25.5668	107.21	-0.339	0.0310566	0.220925	2.17837	0.693438	-0.355498	2.26216	152	5.54991	4.48337	NE	50	0.406814	1.916	4.992	3.47035	12.1454	2.73263	1.59924	1.50243	4.81859
18	175.35	119.848	25.5669	113.26	-0.502	0.0310566	0.220925	2.17837	0.693438	-0.355498	2.26216	152	5.54991	4.48337	NE	50	0.406814	1.916	4.992	3.47035	12.1454	2.73263	1.59924	1.50243	4.81859
18	175.35	119.848	25.5669	119.1	-0.653	0.0310566	0.220925	2.17837	0.693438	-0.355498	2.26216	152	5.54991	4.48337	NE	50	0.406814	1.916	4.992	3.47035	12.1454	2.73263	1.59924	1.50243	4.81859
18	175.35	119.848	25.567	123.85	-0.876	0.0310566	0.220925	2.17837	0.693438	-0.355498	2.26216	152	5.54991	4.48337	NE	50	0.406814	1.916	4.992	3.47035	12.1454	2.73263	1.59924	1.50243	4.81859
18	175.35	119.848	25.567	129.28	-1.277	0.0310566	0.220925	2.17837	0.693438	-0.355498	2.26216	152	5.54991	4.48337	NE	50	0.406814	1.916	4.992	3.47035	12.1454	2.73263	1.59924	1.50243	4.81859
91	100.24	119.86	25.5465	0	2.723	0.054696	0.176175	2.50492	0.376193	-0.177879	0.910661	153	5.54701	4.48526	ENE	63	0.454488	1.621	5.316	3.82042	15.3547	1.95949	1.45194	1.3305	4.82572
91	100.24	119.861	25.5465	2.83	2.54	0.054696	0.176175	2.50492	0.376193	-0.177879	0.910661	153	5.54701	4.48526	ENE	63	0.454488	1.621	5.316	3.82042	15.3547	1.95949	1.45194	1.3305	4.82572
91	100.24	119.861	25.5465	5.48	2.337	0.054696	0.176175	2.50492	0.376193	-0.177879	0.910661	153	5.54701	4.48526	ENE	63	0.454488	1.621	5.316	3.82042	15.3547	1.95949	1.45194	1.3305	4.82572
91	100.24	119.861	25.5465	8.25	2.133	0.054696	0.176175	2.50492	0.376193	-0.177879	0.910661	153	5.54701	4.48526	ENE	63	0.454488	1.621	5.316	3.82042	15.3547	1.95949	1.45194	1.3305	4.82572
91	100.24	119.861	25.5465	10.94	1.943	0.054696	0.176175	2.50492	0.376193	-0.177879	0.910661	153	5.54701	4.48526	ENE	63	0.454488	1.621	5.316	3.82042	15.3547	1.95949	1.45194	1.3305	4.82572
91	100.24	119.861	25.5465	14	1.726	0.054696	0.176175	2.50492	0.376193	-0.177879	0.910661	153	5.54701	4.48526	ENE	63	0.454488	1.621	5.316	3.82042	15.3547	1.95949	1.45194	1.3305	4.82572
91	100.24	119.861	25.5465	17.09	1.507	0.054696	0.176175	2.50492	0.376193	-0.177879	0.910661	153	5.54701	4.48526	ENE	63	0.454488	1.621	5.316	3.82042	15.3547	1.95949	1.45194	1.3305	4.82572
91	100.24	119.861	25.5465	19.95	1.313	0.054696	0.176175	2.50492	0.376193	-0.177879	0.910661	153	5.54701	4.48526	ENE	63	0.454488	1.621	5.316	3.82042	15.3547	1.95949	1.45194	1.3305	4.82572
91	100.24	119.861	25.5465	22.38	1.145	0.054696	0.176175	2.50492	0.376193	-0.177879	0.910661	153	5.54701	4.48526	ENE	63	0.454488	1.621	5.316	3.82042	15.3547	1.95949	1.45194	1.3305	4.82572
91	100.24	119.861	25.5465	24.83	0.991	0.054696	0.176175	2.50492	0.376193	-0.177879	0.910661	153	5.54701	4.48526	ENE	63	0.454488	1.621	5.316	3.82042	15.3547	1.95949	1.45194	1.3305	4.82572
91	100.24	119.861	25.5465	27.78	0.817	0.054696	0.176175	2.50492	0.376193	-0.177879	0.910661	153	5.54701	4.48526	ENE	63	0.454488	1.621	5.316	3.82042	15.3547	1.95949	1.45194	1.3305	4.82572
91	100.24	119.861	25.5465	30.38	0.687	0.054696	0.176175	2.50492	0.376193	-0.177879	0.910661	153	5.54701	4.48526	ENE	63	0.454488	1.621	5.316	3.82042	15.3547	1.95949	1.45194	1.3305	4.82572
91	100.24	119.861	25.5465	33.48	0.548	0.054696	0.176175	2.50492	0.376193	-0.177879	0.910661	153	5.54701	4.48526	ENE	63	0.454488	1.621	5.316	3.82042	15.3547	1.95949	1.45194	1.3305	4.82572
91	100.24	119.861	25.5465	36.35	0.419	0.054696	0.176175	2.50492	0.376193	-0.177879	0.910661	153	5.54701	4.48526	ENE	63	0.454488	1.621	5.316	3.82042	15.3547	1.95949	1.45194	1.3305	4.82572
91	100.24	119.861	25.5465	39.62	0.261	0.054696	0.176175	2.50492	0.376193	-0.177879	0.910661	153	5.54701	4.48526	ENE	63	0.454488	1.621	5.316	3.82042	15.3547	1.95949	1.45194	1.3305	4.82572
91	100.24	119.861	25.5465	42.2	0.147	0.054696	0.176175	2.50492	0.376193	-0.177879	0.910661	153	5.54701	4.48526	ENE	63	0.454488	1.621	5.316	3.82042	15.3547	1.95949	1.45194	1.3305	4.82572
91	100.24	119.861	25.5465	45.44	-0.035	0.054696	0.176175	2.50492	0.376193	-0.177879	0.910661	153	5.54701	4.48526	ENE	63	0.454488	1.621	5.316	3.82042	15.3547	1.95949	1.45194	1.3305	4.82572
91	100.24	119.861	25.5465	48.79	-0.157	0.054696	0.176175	2.50492	0.376193	-0.177879	0.910661	153	5.54701	4.48526	ENE	63	0.454488	1.621	5.316	3.82042	15.3547	1.95949	1.45194	1.3305	4.82572
91	100.24	119.861	25.5464	53.47	-0.324	0.054696	0.176175	2.50492	0.376193	-0.177879	0.910661	153	5.54701	4.48526	ENE	63	0.454488	1.621	5.316	3.82042	15.3547	1.95949	1.45194	1.3305	4.82572
91	100.24	119.861	25.5464	58.56	-0.48	0.054696	0.176175	2.50492	0.376193	-0.177879	0.910661	153	5.54701	4.48526	ENE	63	0.454488	1.621	5.316	3.82042	15.3547	1.95949	1.45194	1.3305	4.82572
184	111.9	119.827	25.4722	0	2.692	0.0653838	0.258639	1.95099	0.820317	-0.387075	0.957278	154	5.53581	4.48362	ENE	69	0.564181	1.312	4.69	4.15947	8.39915	3.40023	1.33089	1.21434	4.66016
184	111.9	119.827	25.4722	2.36	2.402	0.0653838	0.258639	1.95099	0.820317	-0.387075	0.957278	154	5.53581	4.48362	ENE	69	0.564181	1.312	4.69	4.15947	8.39915	3.40023	1.33089	1.21434	4.66016
184	111.9	119.827	25.4722	4.54	2.161	0.0653838	0.258639	1.95099	0.820317	-0.387075	0.957278	154	5.53581	4.48362	ENE	69	0.564181	1.312	4.69	4.15947	8.39915	3.40023	1.33089	1.21434	4.66016
184	111.9	119.827	25.4721	6.97	1.935	0.0653838	0.258639	1.95099	0.820317	-0.387075	0.957278	154	5.53581	4.48362	ENE	69	0.564181	1.312	4.69	4.15947	8.39915	3.40023	1.33089	1.21434	4.66016
184	111.9	119.827	25.4721	9.13	1.756	0.0653838	0.258639	1.95099	0.820317	-0.387075	0.957278	154	5.53581	4.48362	ENE	69	0.564181	1.312	4.69	4.15947	8.39915	3.40023	1.33089	1.21434	4.66016
184	111.9	119.827	25.4721	11.61	1.587	0.0653838	0.258639	1.95099	0.820317	-0.387075	0.957278	154	5.53581	4.48362	ENE	69	0.564181	1.312	4.69	4.15947	8.39915	3.40023	1.33089	1.21434	4.66016
184	111.9	119.827	25.4721	14.28	1.405	0.0653838	0.258639	1.95099	0.820317	-0.387075	0.957278	154	5.53581	4.48362	ENE	69	0.564181	1.312	4.69	4.15947	8.39915	3.40023	1.33089	1.21434	4.66016
184	111.9	119.827	25.472	17.16	1.208	0.0653838	0.258639	1.95099	0.820317	-0.387075	0.957278	154	5.53581	4.48362	ENE	69	0.564181	1.312	4.69	4.15947	8.39915	3.40023	1.33089	1.21434	4.66016
184	111.9	119.827	25.472	19.29	1.067	0.0653838	0.258639	1.95099	0.820317	-0.387075	0.957278	154	5.53581	4.48362	ENE	69	0.564181	1.312	4.69	4.15947	8.39915	3.40023	1.33089	1.21434	4.66016
184	111.9	119.827	25.472	22.38	0.886	0.0653838	0.258639	1.95099	0.820317	-0.387075	0.957278	154	5.53581	4.48362	ENE	69	0.564181	1.312	4.69	4.15947	8.39915	3.40023	1.33089	1.21434	4.66016
184	111.9	119.827	25.472	26.77	0.695	0.0653838	0.258639	1.95099	0.820317	-0.387075	0.957278	154	5.53581	4.48362	ENE	69	0.564181	1.312	4.69	4.15947	8.39915	3.40023	1.33089	1.21434	4.66016
184	111.9	119.827	25.4719	30.75	0.47	0.0653838	0.258639	1.95099	0.820317	-0.387075	0.957278	154	5.53581	4.48362	ENE	69	0.564181	1.312	4.69	4.15947	8.39915	3.40023	1.33089	1.21434	4.66016
184	111.9	119.827	25.4719	34.68	0.32	0.0653838	0.258639	1.95099	0.820317	-0.387075	0.957278	154	5.53581	4.48362	ENE	69	0.564181	1.312	4.69	4.15947	8.39915	3.40023	1.33089	1.21434	4.66016
184	111.9	119.827	25.4719	37.65	0.185	0.0653838	0.258639	1.95099	0.820317	-0.387075	0.957278	154	5.53581	4.48362	ENE	69	0.564181	1.312	4.69	4.15947	8.39915	3.40023	1.33089	1.21434	4.66016
184	111.9	119.827	25.4718	41.2	0.036	0.0653838	0.258639	1.95099	0.820317	-0.387075	0.957278	154	5.53581	4.48362	ENE	69	0.564181	1.312	4.69	4.15947	8.39915	3.40023	1.33089	1.21434	4.66016
184	111.9	119.827	25.4718	45.13	-0.325	0.0653838	0.258639	1.95099	0.820317	-0.387075	0.957278	154	5.53581	4.48362	ENE	69	0.564181	1.312	4.69	4.15947	8.39915	3.40023	1.33089	1.21434	4.66016
184	111.9	119.827	25.4718	49.11	-0.519	0.0653838	0.258639	1.95099	0.820317	-0.387075	0.957278	154	5.53581	4.48362	ENE	69	0.564181	1.312	4.69	4.15947	8.39915	3.40023	1.33089	1.21434	4.66016
141	126.29	119.779	25.4486	0	2.691	0.0535483	0.250855	1.99507	0.643557	-0.399035	1.34259	155	5.5355	4.48692	ENE	69	0.516718	1.358	4.653	3.88312	9.1526	3.26199	1.42553	1.30725	4.77472
141	126.29	119.779	25.4486	2.22	2.489	0.0535483	0.250855	1.99507	0.643557	-0.399035	1.34259	155	5.5355	4.48692	ENE	69	0.516718	1.358	4.653	3.88312	9.1526	3.26199	1.42553	1.30725	4.77472
141	126.29	119.779	25.4485	4.7	2.331	0.0535483	0.250855	1.99507	0.643557	-0.399035	1.34259	155	5.5355	4.48692	ENE	69	0.516718	1.358	4.653	3.88312	9.1526	3.26199	1.42553	1.30725	4.77472
141	126.29	119.779	25.4485	7.72	2.16	0.0535483	0.250855	1.99507	0.643557	-0.399035	1.34259	155	5.5355	4.48692	ENE	69	0.516718	1.358	4.653	3.88312	9.1526	3.26199	1.42553	1.30725	4.77472
141	126.29	119.779	25.4485	10.83	1.994	0.0535483	0.250855	1.99507	0.643557	-0.399035	1.34259	155	5.5355	4.48692	ENE	69	0.516718	1.358	4.653	3.88312	9.1526	3.26199	1.42553	1.30725	4.77472
141	126.29	119.779	25.4485	14.38	1.775	0.0535483	0.250855	1.99507	0.643557	-0.399035	1.34259	155	5.5355	4.48692	ENE	69	0.516718	1.358	4.653	3.88312	9.1526	3.26199	1.42553	1.30725	4.77472
141	126.29	119.779	25.4485	17.79	1.606	0.0535483	0.250855	1.99507	0.643557	-0.399035	1.34259	155	5.5355	4.48692	ENE	69	0.516718	1.358	4.653	3.88312	9.1526	3.26199	1.42553	1.30725	4.77472
141	126.29	119.779	25.4484	21.02	1.401	0.0535483	0.250855	1.99507	0.643557	-0.399035	1.34259	155	5.5355	4.48692	ENE	69	0.516718	1.358	4.653	3.88312	9.1526	3.26199	1.42553	1.30725	4.77472
141	126.29	119.779	25.4484	24.31	1.237	0.0535483	0.250855	1.99507	0.643557	-0.399035	1.34259	155	5.5355	4.48692	ENE	69	0.516718	1.358	4.653	3.88312	9.1526	3.26199	1.42553	1.30725	4.77472
141	126.29	119.779	25.4484	27.55	1.076	0.0535483	0.250855	1.99507	0.643557	-0.399035	1.34259	155	5.5355	4.48692	ENE	69	0.516718	1.358	4.653	3.88312	9.1526	3.26199	1.42553	1.30725	4.77472
141	126.29	119.779	25.4484	27.54	1.055	0.0535483	0.250855	1.99507	0.643557	-0.399035	1.34259	155	5.5355	4.48692	ENE	69	0.516718	1.358	4.653	3.88312	9.1526	3.26199	1.42553	1.30725	4.77472
141	126.29	119.779	25.4484	30.51	0.92	0.0535483	0.250855	1.99507	0.643557	-0.399035	1.34259	155	5.5355	4.48692	ENE	69	0.516718	1.358	4.653	3.88312	9.1526	3.26199	1.42553	1.30725	4.77472
141	126.29	119.779	25.4483	34.45	0.724	0.0535483	0.250855	1.99507	0.643557	-0.399035	1.34259	155	5.5355	4.48692	ENE	69	0.516718	1.358	4.653	3.88312	9.1526	3.26199	1.42553	1.30725	4.77472
141	126.29	119.779	25.4483	38.2	0.511	0.0535483	0.250855	1.99507	0.643557	-0.399035	1.34259	155	5.5355	4.48692	ENE	69	0.516718	1.358	4.653	3.88312	9.1526	3.26199	1.42553	1.30725	4.77472
141	126.29	119.779	25.4483	42.66	0.31	0.0535483	0.250855	1.99507	0.643557	-0.399035	1.34259	155	5.5355	4.48692	ENE	69	0.516718	1.358	4.653	3.88312	9.1526	3.26199	1.42553	1.30725	4.77472
141	126.29	119.779	25.4482	46.71	0.105	0.0535483	0.250855	1.99507	0.643557	-0.399035	1.34259	155	5.5355	4.48692	ENE	69	0.516718	1.358	4.653	3.88312	9.1526	3.26199	1.42553	1.30725	4.77472
141	126.29	119.779	25.4482	51.62	-0.135	0.0535483	0.250855	1.99507	0.643557	-0.399035	1.34259	155	5.5355	4.48692	ENE	69	0.516718	1.358	4.653	3.88312	9.1526	3.26199	1.42553	1.30725	4.77472
141	126.29	119.779	25.4482	55.54	-0.325	0.0535483	0.250855	1.99507	0.643557	-0.399035	1.34259	155	5.5355	4.48692	ENE	69	0.516718	1.358	4.653	3.88312	9.1526	3.26199	1.42553	1.30725	4.77472
141	126.29	119.779	25.4482	59.94	-0.548	0.0535483	0.250855	1.99507	0.643557	-0.399035	1.34259	155	5.5355	4.48692	ENE	69	0.516718	1.358	4.653	3.88312	9.1526	3.26199	1.42553	1.30725	4.77472
141	126.29	119.779	25.4481	64.36	-0.791	0.0535483	0.250855	1.99507	0.643557	-0.399035	1.34259	155	5.5355	4.48692	ENE	69	0.516718	1.358	4.653	3.88312	9.1526	3.26199	1.42553	1.30725	4.77472
141	126.29	119.78	25.4481	68.24	-0.991	0.0535483	0.250855	1.99507	0.643557	-0.399035	1.34259	155	5.5355	4.48692	ENE	69	0.516718	1.358	4.653	3.88312	9.1526	3.26199	1.42553	1.30725	4.77472
141	126.29	119.78	25.4481	72.66	-1.248	0.0535483	0.250855	1.99507	0.643557	-0.399035	1.34259	155	5.5355	4.48692	ENE	69	0.516718	1.358	4.653	3.88312	9.1526	3.26199	1.42553	1.30725	4.77472
141	126.29	119.78	25.448	75.67	-1.361	0.0535483	0.250855	1.99507	0.643557	-0.399035	1.34259	155	5.5355	4.48692	ENE	69	0.516718	1.358	4.653	3.88312	9.1526	3.26199	1.42553	1.30725	4.77472
133	144.2	119.771	25.4453	0	2.706	0.0372189	0.38288	1.38504	0.823402	-0.0337953	0.71138	155	5.5355	4.48692	ENE	69	0.516718	1.358	4.653	3.88312	5.32578	5.60588	1.42553	1.30725	4.77472
133	144.2	119.771	25.4453	5.94	2.437	0.0372189	0.38288	1.38504	0.823402	-0.0337953	0.71138	155	5.5355	4.48692	ENE	69	0.516718	1.358	4.653	3.88312	5.32578	5.60588	1.42553	1.30725	4.77472
133	144.2	119.771	25.4453	10.93	2.229	0.0372189	0.38288	1.38504	0.823402	-0.0337953	0.71138	155	5.5355	4.48692	ENE	69	0.516718	1.358	4.653	3.88312	5.32578	5.60588	1.42553	1.30725	4.77472
133	144.2	119.771	25.4452	16.85	2.015	0.0372189	0.38288	1.38504	0.823402	-0.0337953	0.71138	155	5.5355	4.48692	ENE	69	0.516718	1.358	4.653	3.88312	5.32578	5.60588	1.42553	1.30725	4.77472
133	144.2	119.771	25.4452	22.41	1.792	0.0372189	0.38288	1.38504	0.823402	-0.0337953	0.71138	155	5.5355	4.48692	ENE	69	0.516718	1.358	4.653	3.88312	5.32578	5.60588	1.42553	1.30725	4.77472
133	144.2	119.771	25.4452	28.61	1.544	0.0372189	0.38288	1.38504	0.823402	-0.0337953	0.71138	155	5.5355	4.48692	ENE	69	0.516718	1.358	4.653	3.88312	5.32578	5.60588	1.42553	1.30725	4.77472
133	144.2	119.771	25.4451	34.2	1.31	0.0372189	0.38288	1.38504	0.823402	-0.0337953	0.71138	155	5.5355	4.48692	ENE	69	0.516718	1.358	4.653	3.88312	5.32578	5.60588	1.42553	1.30725	4.77472
133	144.2	119.771	25.4451	40.56	1.062	0.0372189	0.38288	1.38504	0.823402	-0.0337953	0.71138	155	5.5355	4.48692	ENE	69	0.516718	1.358	4.653	3.88312	5.32578	5.60588	1.42553	1.30725	4.77472
133	144.2	119.771	25.4451	43.63	0.943	0.0372189	0.38288	1.38504	0.823402	-0.0337953	0.71138	155	5.5355	4.48692	ENE	69	0.516718	1.358	4.653	3.88312	5.32578	5.60588	1.42553	1.30725	4.77472
133	144.2	119.772	25.445	48.48	0.774	0.0372189	0.38288	1.38504	0.823402	-0.0337953	0.71138	155	5.5355	4.48692	ENE	69	0.516718	1.358	4.653	3.88312	5.32578	5.60588	1.42553	1.30725	4.77472
133	144.2	119.772	25.445	53.35	0.625	0.0372189	0.38288	1.38504	0.823402	-0.0337953	0.71138	155	5.5355	4.48692	ENE	69	0.516718	1.358	4.653	3.88312	5.32578	5.60588	1.42553	1.30725	4.77472
133	144.2	119.772	25.445	58.65	0.418	0.0372189	0.38288	1.38504	0.823402	-0.0337953	0.71138	155	5.5355	4.48692	ENE	69	0.516718	1.358	4.653	3.88312	5.32578	5.60588	1.42553	1.30725	4.77472
133	144.2	119.772	25.4449	64.95	0.244	0.0372189	0.38288	1.38504	0.823402	-0.0337953	0.71138	155	5.5355	4.48692	ENE	69	0.516718	1.358	4.653	3.88312	5.32578	5.60588	1.42553	1.30725	4.77472
133	144.2	119.772	25.4449	70.52	0.1	0.0372189	0.38288	1.38504	0.823402	-0.0337953	0.71138	155	5.5355	4.48692	ENE	69	0.516718	1.358	4.653	3.88312	5.32578	5.60588	1.42553	1.30725	4.77472
133	144.2	119.772	25.4449	76.93	-0.086	0.0372189	0.38288	1.38504	0.823402	-0.0337953	0.71138	155	5.5355	4.48692	ENE	69	0.516718	1.358	4.653	3.88312	5.32578	5.60588	1.42553	1.30725	4.77472
133	144.2	119.772	25.4448	82.1	-0.282	0.0372189	0.38288	1.38504	0.823402	-0.0337953	0.71138	155	5.5355	4.48692	ENE	69	0.516718	1.358	4.653	3.88312	5.32578	5.60588	1.42553	1.30725	4.77472
133	144.2	119.772	25.4448	87.2	-0.451	0.0372189	0.38288	1.38504	0.823402	-0.0337953	0.71138	155	5.5355	4.48692	ENE	69	0.516718	1.358	4.653	3.88312	5.32578	5.60588	1.42553	1.30725	4.77472
133	144.2	119.772	25.4448	91.36	-0.608	0.0372189	0.38288	1.38504	0.823402	-0.0337953	0.71138	155	5.5355	4.48692	ENE	69	0.516718	1.358	4.653	3.88312	5.32578	5.60588	1.42553	1.30725	4.77472
133	144.2	119.772	25.4448	93.97	-0.712	0.0372189	0.38288	1.38504	0.823402	-0.0337953	0.71138	155	5.5355	4.48692	ENE	69	0.516718	1.358	4.653	3.88312	5.32578	5.60588	1.42553	1.30725	4.77472
133	144.2	119.772	25.4447	99.17	-0.985	0.0372189	0.38288	1.38504	0.823402	-0.0337953	0.71138	155	5.5355	4.48692	ENE	69	0.516718	1.358	4.653	3.88312	5.32578	5.60588	1.42553	1.30725	4.77472
145	104.23	119.766	25.443	0	2.533	0.0493264	0.249848	2.00088	0.584728	-0.428005	1.47961	155	5.5355	4.48692	ENE	69	0.516718	1.358	4.653	3.88312	9.20307	3.2441	1.42553	1.30725	4.77472
145	104.23	119.766	25.443	3.03	2.283	0.0493264	0.249848	2.00088	0.584728	-0.428005	1.47961	155	5.5355	4.48692	ENE	69	0.516718	1.358	4.653	3.88312	9.20307	3.2441	1.42553	1.30725	4.77472
145	104.23	119.766	25.4429	6.3	2.082	0.0493264	0.249848	2.00088	0.584728	-0.428005	1.47961	155	5.5355	4.48692	ENE	69	0.516718	1.358	4.653	3.88312	9.20307	3.2441	1.42553	1.30725	4.77472
145	104.23	119.766	25.4429	9.57	1.876	0.0493264	0.249848	2.00088	0.584728	-0.428005	1.47961	155	5.5355	4.48692	ENE	69	0.516718	1.358	4.653	3.88312	9.20307	3.2441	1.42553	1.30725	4.77472
145	104.23	119.766	25.4429	12.53	1.712	0.0493264	0.249848	2.00088	0.584728	-0.428005	1.47961	155	5.5355	4.48692	ENE	69	0.516718	1.358	4.653	3.88312	9.20307	3.2441	1.42553	1.30725	4.77472
145	104.23	119.766	25.4429	13.12	1.647	0.0493264	0.249848	2.00088	0.584728	-0.428005	1.47961	155	5.5355	4.48692	ENE	69	0.516718	1.358	4.653	3.88312	9.20307	3.2441	1.42553	1.30725	4.77472
145	104.23	119.766	25.4429	16.41	1.51	0.0493264	0.249848	2.00088	0.584728	-0.428005	1.47961	155	5.5355	4.48692	ENE	69	0.516718	1.358	4.653	3.88312	9.20307	3.2441	1.42553	1.30725	4.77472
145	104.23	119.766	25.4428	19.37	1.353	0.0493264	0.249848	2.00088	0.584728	-0.428005	1.47961	155	5.5355	4.48692	ENE	69	0.516718	1.358	4.653	3.88312	9.20307	3.2441	1.42553	1.30725	4.77472
145	104.23	119.766	25.4428	24.76	1.117	0.0493264	0.249848	2.00088	0.584728	-0.428005	1.47961	155	5.5355	4.48692	ENE	69	0.516718	1.358	4.653	3.88312	9.20307	3.2441	1.42553	1.30725	4.77472
145	104.23	119.766	25.4428	28.43	0.941	0.0493264	0.249848	2.00088	0.584728	-0.428005	1.47961	155	5.5355	4.48692	ENE	69	0.516718	1.358	4.653	3.88312	9.20307	3.2441	1.42553	1.30725	4.77472
145	104.23	119.766	25.4427	32.57	0.814	0.0493264	0.249848	2.00088	0.584728	-0.428005	1.47961	155	5.5355	4.48692	ENE	69	0.516718	1.358	4.653	3.88312	9.20307	3.2441	1.42553	1.30725	4.77472
145	104.23	119.766	25.4427	36.3	0.665	0.0493264	0.249848	2.00088	0.584728	-0.428005	1.47961	155	5.5355	4.48692	ENE	69	0.516718	1.358	4.653	3.88312	9.20307	3.2441	1.42553	1.30725	4.77472
145	104.23	119.766	25.4427	40.22	0.506	0.0493264	0.249848	2.00088	0.584728	-0.428005	1.47961	155	5.5355	4.48692	ENE	69	0.516718	1.358	4.653	3.88312	9.20307	3.2441	1.42553	1.30725	4.77472
145	104.23	119.766	25.4426	45.87	0.242	0.0493264	0.249848	2.00088	0.584728	-0.428005	1.47961	155	5.5355	4.48692	ENE	69	0.516718	1.358	4.653	3.88312	9.20307	3.2441	1.42553	1.30725	4.77472
145	104.23	119.766	25.4426	50.39	0.052	0.0493264	0.249848	2.00088	0.584728	-0.428005	1.47961	155	5.5355	4.48692	ENE	69	0.516718	1.358	4.653	3.88312	9.20307	3.2441	1.42553	1.30725	4.77472
145	104.23	119.766	25.4426	53.72	-0.104	0.0493264	0.249848	2.00088	0.584728	-0.428005	1.47961	155	5.5355	4.48692	ENE	69	0.516718	1.358	4.653	3.88312	9.20307	3.2441	1.42553	1.30725	4.77472
145	104.23	119.766	25.4426	57.42	-0.281	0.0493264	0.249848	2.00088	0.584728	-0.428005	1.47961	155	5.5355	4.48692	ENE	69	0.516718	1.358	4.653	3.88312	9.20307	3.2441	1.42553	1.30725	4.77472
145	104.23	119.766	25.4425	63.84	-0.616	0.0493264	0.249848	2.00088	0.584728	-0.428005	1.47961	155	5.5355	4.48692	ENE	69	0.516718	1.358	4.653	3.88312	9.20307	3.2441	1.42553	1.30725	4.77472
96	315.13	119.752	25.4278	0	2.742	0.0177135	0.284992	1.81101	0.867382	-0.580788	1.63084	155	5.5355	4.48692	ENE	69	0.516718	1.358	4.653	3.88312	7.71525	3.8697	1.42553	1.30725	4.77472
96	315.13	119.752	25.4278	8.36	2.666	0.0177135	0.284992	1.81101	0.867382	-0.580788	1.63084	155	5.5355	4.48692	ENE	69	0.516718	1.358	4.653	3.88312	7.71525	3.8697	1.42553	1.30725	4.77472
96	315.13	119.752	25.4278	15.83	2.585	0.0177135	0.284992	1.81101	0.867382	-0.580788	1.63084	155	5.5355	4.48692	ENE	69	0.516718	1.358	4.653	3.88312	7.71525	3.8697	1.42553	1.30725	4.77472
96	315.13	119.752	25.4278	24.82	2.472	0.0177135	0.284992	1.81101	0.867382	-0.580788	1.63084	155	5.5355	4.48692	ENE	69	0.516718	1.358	4.653	3.88312	7.71525	3.8697	1.42553	1.30725	4.77472
96	315.13	119.752	25.4278	32.93	2.363	0.0177135	0.284992	1.81101	0.867382	-0.580788	1.63084	155	5.5355	4.48692	ENE	69	0.516718	1.358	4.653	3.88312	7.71525	3.8697	1.42553	1.30725	4.77472
96	315.13	119.752	25.4277	42.16	2.26	0.0177135	0.284992	1.81101	0.867382	-0.580788	1.63084	155	5.5355	4.48692	ENE	69	0.516718	1.358	4.653	3.88312	7.71525	3.8697	1.42553	1.30725	4.77472
96	315.13	119.752	25.4277	50.34	2.144	0.0177135	0.284992	1.81101	0.867382	-0.580788	1.63084	155	5.5355	4.48692	ENE	69	0.516718	1.358	4.653	3.88312	7.71525	3.8697	1.42553	1.30725	4.77472
96	315.13	119.752	25.4277	58.58	2.024	0.0177135	0.284992	1.81101	0.867382	-0.580788	1.63084	155	5.5355	4.48692	ENE	69	0.516718	1.358	4.653	3.88312	7.71525	3.8697	1.42553	1.30725	4.77472
96	315.13	119.752	25.4277	68.05	1.912	0.0177135	0.284992	1.81101	0.867382	-0.580788	1.63084	155	5.5355	4.48692	ENE	69	0.516718	1.358	4.653	3.88312	7.71525	3.8697	1.42553	1.30725	4.77472
96	315.13	119.752	25.4277	78.34	1.767	0.0177135	0.284992	1.81101	0.867382	-0.580788	1.63084	155	5.5355	4.48692	ENE	69	0.516718	1.358	4.653	3.88312	7.71525	3.8697	1.42553	1.30725	4.77472
96	315.13	119.753	25.4277	86.81	1.662	0.0177135	0.284992	1.81101	0.867382	-0.580788	1.63084	155	5.5355	4.48692	ENE	69	0.516718	1.358	4.653	3.88312	7.71525	3.8697	1.42553	1.30725	4.77472
96	315.13	119.753	25.4277	95.33	1.513	0.0177135	0.284992	1.81101	0.867382	-0.580788	1.63084	155	5.5355	4.48692	ENE	69	0.516718	1.358	4.653	3.88312	7.71525	3.8697	1.42553	1.30725	4.77472
96	315.13	119.753	25.4277	103.12	1.377	0.0177135	0.284992	1.81101	0.867382	-0.580788	1.63084	155	5.5355	4.48692	ENE	69	0.516718	1.358	4.653	3.88312	7.71525	3.8697	1.42553	1.30725	4.77472
96	315.13	119.753	25.4277	110.99	1.246	0.0177135	0.284992	1.81101	0.867382	-0.580788	1.63084	155	5.5355	4.48692	ENE	69	0.516718	1.358	4.653	3.88312	7.71525	3.8697	1.42553	1.30725	4.77472
96	315.13	119.753	25.4277	119.79	1.067	0.0177135	0.284992	1.81101	0.867382	-0.580788	1.63084	155	5.5355	4.48692	ENE	69	0.516718	1.358	4.653	3.88312	7.71525	3.8697	1.42553	1.30725	4.77472
96	315.13	119.753	25.4277	128.09	0.903	0.0177135	0.284992	1.81101	0.867382	-0.580788	1.63084	155	5.5355	4.48692	ENE	69	0.516718	1.358	4.653	3.88312	7.71525	3.8697	1.42553	1.30725	4.77472
96	315.13	119.753	25.4277	135.54	0.714	0.0177135	0.284992	1.81101	0.867382	-0.580788	1.63084	155	5.5355	4.48692	ENE	69	0.516718	1.358	4.653	3.88312	7.71525	3.8697	1.42553	1.30725	4.77472
96	315.13	119.753	25.4277	142.82	0.542	0.0177135	0.284992	1.81101	0.867382	-0.580788	1.63084	155	5.5355	4.48692	ENE	69	0.516718	1.358	4.653	3.88312	7.71525	3.8697	1.42553	1.30725	4.77472
96	315.13	119.753	25.4276	150.01	0.373	0.0177135	0.284992	1.81101	0.867382	-0.580788	1.63084	155	5.5355	4.48692	ENE	69	0.516718	1.358	4.653	3.88312	7.71525	3.8697	1.42553	1.30725	4.77472
96	315.13	119.753	25.4276	157.35	0.214	0.0177135	0.284992	1.81101	0.867382	-0.580788	1.63084	155	5.5355	4.48692	ENE	69	0.516718	1.358	4.653	3.88312	7.71525	3.8697	1.42553	1.30725	4.77472
96	315.13	119.753	25.4276	163.88	0.045	0.0177135	0.284992	1.81101	0.867382	-0.580788	1.63084	155	5.5355	4.48692	ENE	69	0.516718	1.358	4.653	3.88312	7.71525	3.8697	1.42553	1.30725	4.77472
96	315.13	119.753	25.4276	170.45	-0.136	0.0177135	0.284992	1.81101	0.867382	-0.580788	1.63084	155	5.5355	4.48692	ENE	69	0.516718	1.358	4.653	3.88312	7.71525	3.8697	1.42553	1.30725	4.77472
96	315.13	119.753	25.4276	175.99	-0.239	0.0177135	0.284992	1.81101	0.867382	-0.580788	1.63084	155	5.5355	4.48692	ENE	69	0.516718	1.358	4.653	3.88312	7.71525	3.8697	1.42553	1.30725	4.77472
96	315.13	119.754	25.4276	186.64	-0.473	0.0177135	0.284992	1.81101	0.867382	-0.580788	1.63084	155	5.5355	4.48692	ENE	69	0.516718	1.358	4.653	3.88312	7.71525	3.8697	1.42553	1.30725	4.77472
96	315.13	119.754	25.4276	199.17	-0.786	0.0177135	0.284992	1.81101	0.867382	-0.580788	1.63084	155	5.5355	4.48692	ENE	69	0.516718	1.358	4.653	3.88312	7.71525	3.8697	1.42553	1.30725	4.77472
74	243.73	119.753	25.4214	0	2.699	0.0189382	0.239135	2.0641	0.736973	-0.372028	1.43917	155	5.5355	4.48692	ENE	69	0.516718	1.358	4.653	3.88312	9.77615	3.05393	1.42553	1.30725	4.77472
74	243.73	119.753	25.4215	9.77	2.572	0.0189382	0.239135	2.0641	0.736973	-0.372028	1.43917	155	5.5355	4.48692	ENE	69	0.516718	1.358	4.653	3.88312	9.77615	3.05393	1.42553	1.30725	4.77472
74	243.73	119.753	25.4215	20.26	2.452	0.0189382	0.239135	2.0641	0.736973	-0.372028	1.43917	155	5.5355	4.48692	ENE	69	0.516718	1.358	4.653	3.88312	9.77615	3.05393	1.42553	1.30725	4.77472
74	243.73	119.753	25.4215	29.81	2.308	0.0189382	0.239135	2.0641	0.736973	-0.372028	1.43917	155	5.5355	4.48692	ENE	69	0.516718	1.358	4.653	3.88312	9.77615	3.05393	1.42553	1.30725	4.77472
74	243.73	119.753	25.4215	39.51	2.171	0.0189382	0.239135	2.0641	0.736973	-0.372028	1.43917	155	5.5355	4.48692	ENE	69	0.516718	1.358	4.653	3.88312	9.77615	3.05393	1.42553	1.30725	4.77472
74	243.73	119.753	25.4216	47.66	2.036	0.0189382	0.239135	2.0641	0.736973	-0.372028	1.43917	155	5.5355	4.48692	ENE	69	0.516718	1.358	4.653	3.88312	9.77615	3.05393	1.42553	1.30725	4.77472
74	243.73	119.753	25.4216	57.14	1.886	0.0189382	0.239135	2.0641	0.736973	-0.372028	1.43917	155	5.5355	4.48692	ENE	69	0.516718	1.358	4.653	3.88312	9.77615	3.05393	1.42553	1.30725	4.77472
74	243.73	119.753	25.4216	66.52	1.739	0.0189382	0.239135	2.0641	0.736973	-0.372028	1.43917	155	5.5355	4.48692	ENE	69	0.516718	1.358	4.653	3.88312	9.77615	3.05393	1.42553	1.30725	4.77472
74	243.73	119.753	25.4216	76.08	1.56	0.0189382	0.239135	2.0641	0.736973	-0.372028	1.43917	155	5.5355	4.48692	ENE	69	0.516718	1.358	4.653	3.88312	9.77615	3.05393	1.42553	1.30725	4.77472
74	243.73	119.753	25.4216	86.23	1.352	0.0189382	0.239135	2.0641	0.736973	-0.372028	1.43917	155	5.5355	4.48692	ENE	69	0.516718	1.358	4.653	3.88312	9.77615	3.05393	1.42553	1.30725	4.77472
74	243.73	119.754	25.4217	96.49	1.127	0.0189382	0.239135	2.0641	0.736973	-0.372028	1.43917	155	5.5355	4.48692	ENE	69	0.516718	1.358	4.653	3.88312	9.77615	3.05393	1.42553	1.30725	4.77472
74	243.73	119.754	25.4217	104.53	0.971	0.0189382	0.239135	2.0641	0.736973	-0.372028	1.43917	155	5.5355	4.48692	ENE	69	0.516718	1.358	4.653	3.88312	9.77615	3.05393	1.42553	1.30725	4.77472
74	243.73	119.754	25.4217	111.59	0.828	0.0189382	0.239135	2.0641	0.736973	-0.372028	1.43917	155	5.5355	4.48692	ENE	69	0.516718	1.358	4.653	3.88312	9.77615	3.05393	1.42553	1.30725	4.77472
74	243.73	119.754	25.4217	120.45	0.644	0.0189382	0.239135	2.0641	0.736973	-0.372028	1.43917	155	5.5355	4.48692	ENE	69	0.516718	1.358	4.653	3.88312	9.77615	3.05393	1.42553	1.30725	4.77472
74	243.73	119.754	25.4218	129.36	0.433	0.0189382	0.239135	2.0641	0.736973	-0.372028	1.43917	155	5.5355	4.48692	ENE	69	0.516718	1.358	4.653	3.88312	9.77615	3.05393	1.42553	1.30725	4.77472
74	243.73	119.754	25.4218	137.87	0.255	0.0189382	0.239135	2.0641	0.736973	-0.372028	1.43917	155	5.5355	4.48692	ENE	69	0.516718	1.358	4.653	3.88312	9.77615	3.05393	1.42553	1.30725	4.77472
74	243.73	119.754	25.4218	146.58	0.068	0.0189382	0.239135	2.0641	0.736973	-0.372028	1.43917	155	5.5355	4.48692	ENE	69	0.516718	1.358	4.653	3.88312	9.77615	3.05393	1.42553	1.30725	4.77472
74	243.73	119.754	25.4218	155.04	-0.116	0.0189382	0.239135	2.0641	0.736973	-0.372028	1.43917	155	5.5355	4.48692	ENE	69	0.516718	1.358	4.653	3.88312	9.77615	3.05393	1.42553	1.30725	4.77472
74	243.73	119.754	25.4218	162.7	-0.263	0.0189382	0.239135	2.0641	0.736973	-0.372028	1.43917	155	5.5355	4.48692	ENE	69	0.516718	1.358	4.653	3.88312	9.77615	3.05393	1.42553	1.30725	4.77472
74	243.73	119.754	25.4218	164.96	-0.316	0.0189382	0.239135	2.0641	0.736973	-0.372028	1.43917	155	5.5355	4.48692	ENE	69	0.516718	1.358	4.653	3.88312	9.77615	3.05393	1.42553	1.30725	4.77472
74	243.73	119.754	25.4219	171.01	-0.647	0.0189382	0.239135	2.0641	0.736973	-0.372028	1.43917	155	5.5355	4.48692	ENE	69	0.516718	1.358	4.653	3.88312	9.77615	3.05393	1.42553	1.30725	4.77472
74	243.73	119.754	25.4219	184.6	-0.797	0.0189382	0.239135	2.0641	0.736973	-0.372028	1.43917	155	5.5355	4.48692	ENE	69	0.516718	1.358	4.653	3.88312	9.77615	3.05393	1.42553	1.30725	4.77472
19	174.162	119.757	25.4166	-0.004	2.685	0.026781	0.182522	2.45385	0.394289	-0.0715219	1.01749	155	5.5355	4.48692	ENE	69	0.516718	1.358	4.653	3.88312	14.4445	2.06692	1.42553	1.30725	4.77472
19	174.162	119.757	25.4166	2.953	2.462	0.026781	0.182522	2.45385	0.394289	-0.0715219	1.01749	155	5.5355	4.48692	ENE	69	0.516718	1.358	4.653	3.88312	14.4445	2.06692	1.42553	1.30725	4.77472
19	174.162	119.757	25.4166	6.239	2.261	0.026781	0.182522	2.45385	0.394289	-0.0715219	1.01749	155	5.5355	4.48692	ENE	69	0.516718	1.358	4.653	3.88312	14.4445	2.06692	1.42553	1.30725	4.77472
19	174.162	119.757	25.4167	9.269	2.047	0.026781	0.182522	2.45385	0.394289	-0.0715219	1.01749	155	5.5355	4.48692	ENE	69	0.516718	1.358	4.653	3.88312	14.4445	2.06692	1.42553	1.30725	4.77472
19	174.162	119.757	25.4167	12.986	1.875	0.026781	0.182522	2.45385	0.394289	-0.0715219	1.01749	155	5.5355	4.48692	ENE	69	0.516718	1.358	4.653	3.88312	14.4445	2.06692	1.42553	1.30725	4.77472
19	174.162	119.757	25.4167	17.772	1.774	0.026781	0.182522	2.45385	0.394289	-0.0715219	1.01749	155	5.5355	4.48692	ENE	69	0.516718	1.358	4.653	3.88312	14.4445	2.06692	1.42553	1.30725	4.77472
19	174.162	119.757	25.4168	22.452	1.649	0.026781	0.182522	2.45385	0.394289	-0.0715219	1.01749	155	5.5355	4.48692	ENE	69	0.516718	1.358	4.653	3.88312	14.4445	2.06692	1.42553	1.30725	4.77472
19	174.162	119.757	25.4168	25.815	1.591	0.026781	0.182522	2.45385	0.394289	-0.0715219	1.01749	155	5.5355	4.48692	ENE	69	0.516718	1.358	4.653	3.88312	14.4445	2.06692	1.42553	1.30725	4.77472
19	174.162	119.757	25.4169	31.72	1.429	0.026781	0.182522	2.45385	0.394289	-0.0715219	1.01749	155	5.5355	4.48692	ENE	69	0.516718	1.358	4.653	3.88312	14.4445	2.06692	1.42553	1.30725	4.77472
19	174.162	119.757	25.4169	38.691	1.266	0.026781	0.182522	2.45385	0.394289	-0.0715219	1.01749	155	5.5355	4.48692	ENE	69	0.516718	1.358	4.653	3.88312	14.4445	2.06692	1.42553	1.30725	4.77472
19	174.162	119.757	25.417	50.378	1.017	0.026781	0.182522	2.45385	0.394289	-0.0715219	1.01749	155	5.5355	4.48692	ENE	69	0.516718	1.358	4.653	3.88312	14.4445	2.06692	1.42553	1.30725	4.77472
19	174.162	119.757	25.4171	61.971	0.805	0.026781	0.182522	2.45385	0.394289	-0.0715219	1.01749	155	5.5355	4.48692	ENE	69	0.516718	1.358	4.653	3.88312	14.4445	2.06692	1.42553	1.30725	4.77472
19	174.162	119.757	25.4172	71.557	0.621	0.026781	0.182522	2.45385	0.394289	-0.0715219	1.01749	155	5.5355	4.48692	ENE	69	0.516718	1.358	4.653	3.88312	14.4445	2.06692	1.42553	1.30725	4.77472
19	174.162	119.757	25.4173	85.624	0.5	0.026781	0.182522	2.45385	0.394289	-0.0715219	1.01749	155	5.5355	4.48692	ENE	69	0.516718	1.358	4.653	3.88312	14.4445	2.06692	1.42553	1.30725	4.77472
19	174.162	119.757	25.4174	93.235	0.304	0.026781	0.182522	2.45385	0.394289	-0.0715219	1.01749	155	5.5355	4.48692	ENE	69	0.516718	1.358	4.653	3.88312	14.4445	2.06692	1.42553	1.30725	4.77472
19	174.162	119.757	25.4174	100.278	0.073	0.026781	0.182522	2.45385	0.394289	-0.0715219	1.01749	155	5.5355	4.48692	ENE	69	0.516718	1.358	4.653	3.88312	14.4445	2.06692	1.42553	1.30725	4.77472
19	174.162	119.757	25.4175	107.211	-0.191	0.026781	0.182522	2.45385	0.394289	-0.0715219	1.01749	155	5.5355	4.48692	ENE	69	0.516718	1.358	4.653	3.88312	14.4445	2.06692	1.42553	1.30725	4.77472
19	174.162	119.758	25.4176	115.86	-0.397	0.026781	0.182522	2.45385	0.394289	-0.0715219	1.01749	155	5.5355	4.48692	ENE	69	0.516718	1.358	4.653	3.88312	14.4445	2.06692	1.42553	1.30725	4.77472
19	174.162	119.758	25.4176	123.964	-0.615	0.026781	0.182522	2.45385	0.394289	-0.0715219	1.01749	155	5.5355	4.48692	ENE	69	0.516718	1.358	4.653	3.88312	14.4445	2.06692	1.42553	1.30725	4.77472
19	174.162	119.758	25.4177	135.558	-0.929	0.026781	0.182522	2.45385	0.394289	-0.0715219	1.01749	155	5.5355	4.48692	ENE	69	0.516718	1.358	4.653	3.88312	14.4445	2.06692	1.42553	1.30725	4.77472
19	174.162	119.758	25.4178	142.452	-1.13	0.026781	0.182522	2.45385	0.394289	-0.0715219	1.01749	155	5.5355	4.48692	ENE	69	0.516718	1.358	4.653	3.88312	14.4445	2.06692	1.42553	1.30725	4.77472
205	142.61	119.76	25.4013	0	2.761	0.0434099	0.220257	2.18274	0.962131	-0.529203	2.34006	156	5.53322	4.49213	ENE	64	0.510811	1.663	5.024	3.75744	11.6693	2.72084	1.4726	1.38134	4.63807
205	142.61	119.76	25.4013	1.6	2.578	0.0434099	0.220257	2.18274	0.962131	-0.529203	2.34006	156	5.53322	4.49213	ENE	64	0.510811	1.663	5.024	3.75744	11.6693	2.72084	1.4726	1.38134	4.63807
205	142.61	119.76	25.4012	3.45	2.391	0.0434099	0.220257	2.18274	0.962131	-0.529203	2.34006	156	5.53322	4.49213	ENE	64	0.510811	1.663	5.024	3.75744	11.6693	2.72084	1.4726	1.38134	4.63807
205	142.61	119.76	25.4012	5.19	2.24	0.0434099	0.220257	2.18274	0.962131	-0.529203	2.34006	156	5.53322	4.49213	ENE	64	0.510811	1.663	5.024	3.75744	11.6693	2.72084	1.4726	1.38134	4.63807
205	142.61	119.76	25.4012	7.18	2.069	0.0434099	0.220257	2.18274	0.962131	-0.529203	2.34006	156	5.53322	4.49213	ENE	64	0.510811	1.663	5.024	3.75744	11.6693	2.72084	1.4726	1.38134	4.63807
205	142.61	119.76	25.4012	9.58	1.878	0.0434099	0.220257	2.18274	0.962131	-0.529203	2.34006	156	5.53322	4.49213	ENE	64	0.510811	1.663	5.024	3.75744	11.6693	2.72084	1.4726	1.38134	4.63807
205	142.61	119.76	25.4012	9.62	1.87	0.0434099	0.220257	2.18274	0.962131	-0.529203	2.34006	156	5.53322	4.49213	ENE	64	0.510811	1.663	5.024	3.75744	11.6693	2.72084	1.4726	1.38134	4.63807
205	142.61	119.76	25.4012	11.54	1.729	0.0434099	0.220257	2.18274	0.962131	-0.529203	2.34006	156	5.53322	4.49213	ENE	64	0.510811	1.663	5.024	3.75744	11.6693	2.72084	1.4726	1.38134	4.63807
205	142.61	119.76	25.4012	13.61	1.599	0.0434099	0.220257	2.18274	0.962131	-0.529203	2.34006	156	5.53322	4.49213	ENE	64	0.510811	1.663	5.024	3.75744	11.6693	2.72084	1.4726	1.38134	4.63807
205	142.61	119.76	25.4011	16.07	1.46	0.0434099	0.220257	2.18274	0.962131	-0.529203	2.34006	156	5.53322	4.49213	ENE	64	0.510811	1.663	5.024	3.75744	11.6693	2.72084	1.4726	1.38134	4.63807
205	142.61	119.76	25.4011	18.61	1.337	0.0434099	0.220257	2.18274	0.962131	-0.529203	2.34006	156	5.53322	4.49213	ENE	64	0.510811	1.663	5.024	3.75744	11.6693	2.72084	1.4726	1.38134	4.63807
205	142.61	119.76	25.4011	21.76	1.2	0.0434099	0.220257	2.18274	0.962131	-0.529203	2.34006	156	5.53322	4.49213	ENE	64	0.510811	1.663	5.024	3.75744	11.6693	2.72084	1.4726	1.38134	4.63807
205	142.61	119.76	25.4011	24.46	1.073	0.0434099	0.220257	2.18274	0.962131	-0.529203	2.34006	156	5.53322	4.49213	ENE	64	0.510811	1.663	5.024	3.75744	11.6693	2.72084	1.4726	1.38134	4.63807
205	142.61	119.76	25.401	27.38	0.985	0.0434099	0.220257	2.18274	0.962131	-0.529203	2.34006	156	5.53322	4.49213	ENE	64	0.510811	1.663	5.024	3.75744	11.6693	2.72084	1.4726	1.38134	4.63807
205	142.61	119.76	25.401	32.28	0.88	0.0434099	0.220257	2.18274	0.962131	-0.529203	2.34006	156	5.53322	4.49213	ENE	64	0.510811	1.663	5.024	3.75744	11.6693	2.72084	1.4726	1.38134	4.63807
205	142.61	119.76	25.401	38.04	0.75	0.0434099	0.220257	2.18274	0.962131	-0.529203	2.34006	156	5.53322	4.49213	ENE	64	0.510811	1.663	5.024	3.75744	11.6693	2.72084	1.4726	1.38134	4.63807
205	142.61	119.76	25.4009	42.76	0.616	0.0434099	0.220257	2.18274	0.962131	-0.529203	2.34006	156	5.53322	4.49213	ENE	64	0.510811	1.663	5.024	3.75744	11.6693	2.72084	1.4726	1.38134	4.63807
205	142.61	119.76	25.4009	47.78	0.494	0.0434099	0.220257	2.18274	0.962131	-0.529203	2.34006	156	5.53322	4.49213	ENE	64	0.510811	1.663	5.024	3.75744	11.6693	2.72084	1.4726	1.38134	4.63807
205	142.61	119.76	25.4009	48.52	0.473	0.0434099	0.220257	2.18274	0.962131	-0.529203	2.34006	156	5.53322	4.49213	ENE	64	0.510811	1.663	5.024	3.75744	11.6693	2.72084	1.4726	1.38134	4.63807
205	142.61	119.76	25.4008	52.87	0.354	0.0434099	0.220257	2.18274	0.962131	-0.529203	2.34006	156	5.53322	4.49213	ENE	64	0.510811	1.663	5.024	3.75744	11.6693	2.72084	1.4726	1.38134	4.63807
205	142.61	119.76	25.4008	57.89	0.248	0.0434099	0.220257	2.18274	0.962131	-0.529203	2.34006	156	5.53322	4.49213	ENE	64	0.510811	1.663	5.024	3.75744	11.6693	2.72084	1.4726	1.38134	4.63807
296	66.33	119.723	25.6314	0	2.68	0.106073	1.62366	-0.699246	0.832211	-0.00246706	0.92426	147	5.60574	4.55496	ENE	65	0.433182	1.149	5.043	4.58055	1.17559	23.2934	1.22381	1.11659	4.46916
296	66.33	119.723	25.6314	1.42	2.524	0.106073	1.62366	-0.699246	0.832211	-0.00246706	0.92426	147	5.60574	4.55496	ENE	65	0.433182	1.149	5.043	4.58055	1.17559	23.2934	1.22381	1.11659	4.46916
296	66.33	119.723	25.6315	2.8	2.384	0.106073	1.62366	-0.699246	0.832211	-0.00246706	0.92426	147	5.60574	4.55496	ENE	65	0.433182	1.149	5.043	4.58055	1.17559	23.2934	1.22381	1.11659	4.46916
296	66.33	119.723	25.6315	4.14	2.244	0.106073	1.62366	-0.699246	0.832211	-0.00246706	0.92426	147	5.60574	4.55496	ENE	65	0.433182	1.149	5.043	4.58055	1.17559	23.2934	1.22381	1.11659	4.46916
296	66.33	119.723	25.6315	5.56	2.146	0.106073	1.62366	-0.699246	0.832211	-0.00246706	0.92426	147	5.60574	4.55496	ENE	65	0.433182	1.149	5.043	4.58055	1.17559	23.2934	1.22381	1.11659	4.46916
296	66.33	119.723	25.6315	6.99	2.004	0.106073	1.62366	-0.699246	0.832211	-0.00246706	0.92426	147	5.60574	4.55496	ENE	65	0.433182	1.149	5.043	4.58055	1.17559	23.2934	1.22381	1.11659	4.46916
296	66.33	119.723	25.6315	8.54	1.825	0.106073	1.62366	-0.699246	0.832211	-0.00246706	0.92426	147	5.60574	4.55496	ENE	65	0.433182	1.149	5.043	4.58055	1.17559	23.2934	1.22381	1.11659	4.46916
296	66.33	119.723	25.6315	10.07	1.651	0.106073	1.62366	-0.699246	0.832211	-0.00246706	0.92426	147	5.60574	4.55496	ENE	65	0.433182	1.149	5.043	4.58055	1.17559	23.2934	1.22381	1.11659	4.46916
296	66.33	119.723	25.6315	10.06	1.606	0.106073	1.62366	-0.699246	0.832211	-0.00246706	0.92426	147	5.60574	4.55496	ENE	65	0.433182	1.149	5.043	4.58055	1.17559	23.2934	1.22381	1.11659	4.46916
296	66.33	119.723	25.6315	11.19	1.537	0.106073	1.62366	-0.699246	0.832211	-0.00246706	0.92426	147	5.60574	4.55496	ENE	65	0.433182	1.149	5.043	4.58055	1.17559	23.2934	1.22381	1.11659	4.46916
296	66.33	119.723	25.6315	12.35	1.42	0.106073	1.62366	-0.699246	0.832211	-0.00246706	0.92426	147	5.60574	4.55496	ENE	65	0.433182	1.149	5.043	4.58055	1.17559	23.2934	1.22381	1.11659	4.46916
296	66.33	119.723	25.6315	13.89	1.271	0.106073	1.62366	-0.699246	0.832211	-0.00246706	0.92426	147	5.60574	4.55496	ENE	65	0.433182	1.149	5.043	4.58055	1.17559	23.2934	1.22381	1.11659	4.46916
296	66.33	119.723	25.6315	15.4	1.123	0.106073	1.62366	-0.699246	0.832211	-0.00246706	0.92426	147	5.60574	4.55496	ENE	65	0.433182	1.149	5.043	4.58055	1.17559	23.2934	1.22381	1.11659	4.46916
296	66.33	119.723	25.6315	17.19	0.931	0.106073	1.62366	-0.699246	0.832211	-0.00246706	0.92426	147	5.60574	4.55496	ENE	65	0.433182	1.149	5.043	4.58055	1.17559	23.2934	1.22381	1.11659	4.46916
296	66.33	119.723	25.6315	18.53	0.797	0.106073	1.62366	-0.699246	0.832211	-0.00246706	0.92426	147	5.60574	4.55496	ENE	65	0.433182	1.149	5.043	4.58055	1.17559	23.2934	1.22381	1.11659	4.46916
296	66.33	119.723	25.6315	19.93	0.631	0.106073	1.62366	-0.699246	0.832211	-0.00246706	0.92426	147	5.60574	4.55496	ENE	65	0.433182	1.149	5.043	4.58055	1.17559	23.2934	1.22381	1.11659	4.46916
296	66.33	119.723	25.6315	21.59	0.5	0.106073	1.62366	-0.699246	0.832211	-0.00246706	0.92426	147	5.60574	4.55496	ENE	65	0.433182	1.149	5.043	4.58055	1.17559	23.2934	1.22381	1.11659	4.46916
296	66.33	119.723	25.6315	23.2	0.362	0.106073	1.62366	-0.699246	0.832211	-0.00246706	0.92426	147	5.60574	4.55496	ENE	65	0.433182	1.149	5.043	4.58055	1.17559	23.2934	1.22381	1.11659	4.46916
296	66.33	119.723	25.6315	24.74	0.189	0.106073	1.62366	-0.699246	0.832211	-0.00246706	0.92426	147	5.60574	4.55496	ENE	65	0.433182	1.149	5.043	4.58055	1.17559	23.2934	1.22381	1.11659	4.46916
296	66.33	119.723	25.6315	26.32	0.072	0.106073	1.62366	-0.699246	0.832211	-0.00246706	0.92426	147	5.60574	4.55496	ENE	65	0.433182	1.149	5.043	4.58055	1.17559	23.2934	1.22381	1.11659	4.46916
296	66.33	119.723	25.6316	27.97	-0.126	0.106073	1.62366	-0.699246	0.832211	-0.00246706	0.92426	147	5.60574	4.55496	ENE	65	0.433182	1.149	5.043	4.58055	1.17559	23.2934	1.22381	1.11659	4.46916
296	66.33	119.723	25.6316	29.55	-0.265	0.106073	1.62366	-0.699246	0.832211	-0.00246706	0.92426	147	5.60574	4.55496	ENE	65	0.433182	1.149	5.043	4.58055	1.17559	23.2934	1.22381	1.11659	4.46916
296	66.33	119.723	25.6316	31.09	-0.42	0.106073	1.62366	-0.699246	0.832211	-0.00246706	0.92426	147	5.60574	4.55496	ENE	65	0.433182	1.149	5.043	4.58055	1.17559	23.2934	1.22381	1.11659	4.46916
296	66.33	119.723	25.6316	32.6	-0.587	0.106073	1.62366	-0.699246	0.832211	-0.00246706	0.92426	147	5.60574	4.55496	ENE	65	0.433182	1.149	5.043	4.58055	1.17559	23.2934	1.22381	1.11659	4.46916
296	66.33	119.723	25.6316	34.28	-0.766	0.106073	1.62366	-0.699246	0.832211	-0.00246706	0.92426	147	5.60574	4.55496	ENE	65	0.433182	1.149	5.043	4.58055	1.17559	23.2934	1.22381	1.11659	4.46916
296	66.33	119.723	25.6316	36.04	-0.934	0.106073	1.62366	-0.699246	0.832211	-0.00246706	0.92426	147	5.60574	4.55496	ENE	65	0.433182	1.149	5.043	4.58055	1.17559	23.2934	1.22381	1.11659	4.46916
296	66.33	119.723	25.6316	37.76	-1.136	0.106073	1.62366	-0.699246	0.832211	-0.00246706	0.92426	147	5.60574	4.55496	ENE	65	0.433182	1.149	5.043	4.58055	1.17559	23.2934	1.22381	1.11659	4.46916
296	66.33	119.723	25.6316	39.59	-1.322	0.106073	1.62366	-0.699246	0.832211	-0.00246706	0.92426	147	5.60574	4.55496	ENE	65	0.433182	1.149	5.043	4.58055	1.17559	23.2934	1.22381	1.11659	4.46916
296	66.33	119.723	25.6316	42.03	-1.611	0.106073	1.62366	-0.699246	0.832211	-0.00246706	0.92426	147	5.60574	4.55496	ENE	65	0.433182	1.149	5.043	4.58055	1.17559	23.2934	1.22381	1.11659	4.46916
296	66.33	119.723	25.6316	43.84	-1.885	0.106073	1.62366	-0.699246	0.832211	-0.00246706	0.92426	147	5.60574	4.55496	ENE	65	0.433182	1.149	5.043	4.58055	1.17559	23.2934	1.22381	1.11659	4.46916
296	66.33	119.723	25.6316	45.61	-2.158	0.106073	1.62366	-0.699246	0.832211	-0.00246706	0.92426	147	5.60574	4.55496	ENE	65	0.433182	1.149	5.043	4.58055	1.17559	23.2934	1.22381	1.11659	4.46916
176	110.42	119.888	25.5896	0	2.735	0.0562059	0.212567	2.23401	0.391563	-0.113815	1.78825	152	5.54991	4.48337	NE	50	0.406814	1.916	4.992	3.47035	12.8315	2.58652	1.59924	1.50243	4.81859
176	110.42	119.888	25.5896	2.99	2.515	0.0562059	0.212567	2.23401	0.391563	-0.113815	1.78825	152	5.54991	4.48337	NE	50	0.406814	1.916	4.992	3.47035	12.8315	2.58652	1.59924	1.50243	4.81859
176	110.42	119.888	25.5895	5.78	2.295	0.0562059	0.212567	2.23401	0.391563	-0.113815	1.78825	152	5.54991	4.48337	NE	50	0.406814	1.916	4.992	3.47035	12.8315	2.58652	1.59924	1.50243	4.81859
176	110.42	119.888	25.5895	8.82	2.097	0.0562059	0.212567	2.23401	0.391563	-0.113815	1.78825	152	5.54991	4.48337	NE	50	0.406814	1.916	4.992	3.47035	12.8315	2.58652	1.59924	1.50243	4.81859
176	110.42	119.888	25.5895	12.02	1.901	0.0562059	0.212567	2.23401	0.391563	-0.113815	1.78825	152	5.54991	4.48337	NE	50	0.406814	1.916	4.992	3.47035	12.8315	2.58652	1.59924	1.50243	4.81859
176	110.42	119.888	25.5895	15.92	1.717	0.0562059	0.212567	2.23401	0.391563	-0.113815	1.78825	152	5.54991	4.48337	NE	50	0.406814	1.916	4.992	3.47035	12.8315	2.58652	1.59924	1.50243	4.81859
176	110.42	119.889	25.5894	19.11	1.551	0.0562059	0.212567	2.23401	0.391563	-0.113815	1.78825	152	5.54991	4.48337	NE	50	0.406814	1.916	4.992	3.47035	12.8315	2.58652	1.59924	1.50243	4.81859
176	110.42	119.889	25.5894	22.75	1.346	0.0562059	0.212567	2.23401	0.391563	-0.113815	1.78825	152	5.54991	4.48337	NE	50	0.406814	1.916	4.992	3.47035	12.8315	2.58652	1.59924	1.50243	4.81859
176	110.42	119.889	25.5894	25.65	1.191	0.0562059	0.212567	2.23401	0.391563	-0.113815	1.78825	152	5.54991	4.48337	NE	50	0.406814	1.916	4.992	3.47035	12.8315	2.58652	1.59924	1.50243	4.81859
176	110.42	119.889	25.5893	29.07	1.015	0.0562059	0.212567	2.23401	0.391563	-0.113815	1.78825	152	5.54991	4.48337	NE	50	0.406814	1.916	4.992	3.47035	12.8315	2.58652	1.59924	1.50243	4.81859
176	110.42	119.889	25.5893	33.19	0.799	0.0562059	0.212567	2.23401	0.391563	-0.113815	1.78825	152	5.54991	4.48337	NE	50	0.406814	1.916	4.992	3.47035	12.8315	2.58652	1.59924	1.50243	4.81859
176	110.42	119.889	25.5893	37.55	0.548	0.0562059	0.212567	2.23401	0.391563	-0.113815	1.78825	152	5.54991	4.48337	NE	50	0.406814	1.916	4.992	3.47035	12.8315	2.58652	1.59924	1.50243	4.81859
176	110.42	119.889	25.5892	40.84	0.362	0.0562059	0.212567	2.23401	0.391563	-0.113815	1.78825	152	5.54991	4.48337	NE	50	0.406814	1.916	4.992	3.47035	12.8315	2.58652	1.59924	1.50243	4.81859
176	110.42	119.889	25.5892	44.73	0.136	0.0562059	0.212567	2.23401	0.391563	-0.113815	1.78825	152	5.54991	4.48337	NE	50	0.406814	1.916	4.992	3.47035	12.8315	2.58652	1.59924	1.50243	4.81859
176	110.42	119.889	25.5892	48.13	-0.006	0.0562059	0.212567	2.23401	0.391563	-0.113815	1.78825	152	5.54991	4.48337	NE	50	0.406814	1.916	4.992	3.47035	12.8315	2.58652	1.59924	1.50243	4.81859
176	110.42	119.889	25.5891	51.04	-0.178	0.0562059	0.212567	2.23401	0.391563	-0.113815	1.78825	152	5.54991	4.48337	NE	50	0.406814	1.916	4.992	3.47035	12.8315	2.58652	1.59924	1.50243	4.81859
176	110.42	119.889	25.5891	54.98	-0.354	0.0562059	0.212567	2.23401	0.391563	-0.113815	1.78825	152	5.54991	4.48337	NE	50	0.406814	1.916	4.992	3.47035	12.8315	2.58652	1.59924	1.50243	4.81859
176	110.42	119.889	25.5891	59.46	-0.607	0.0562059	0.212567	2.23401	0.391563	-0.113815	1.78825	152	5.54991	4.48337	NE	50	0.406814	1.916	4.992	3.47035	12.8315	2.58652	1.59924	1.50243	4.81859
99	98.97	119.693	25.333	0	2.709	0.0478281	0.280766	1.83256	0.940944	-0.66214	2.28657	156	5.53322	4.49213	ENE	64	0.510811	1.663	5.024	3.75744	8.36781	3.79435	1.4726	1.38134	4.63807
99	98.97	119.693	25.333	2.85	2.492	0.0478281	0.280766	1.83256	0.940944	-0.66214	2.28657	156	5.53322	4.49213	ENE	64	0.510811	1.663	5.024	3.75744	8.36781	3.79435	1.4726	1.38134	4.63807
99	98.97	119.693	25.333	5.69	2.277	0.0478281	0.280766	1.83256	0.940944	-0.66214	2.28657	156	5.53322	4.49213	ENE	64	0.510811	1.663	5.024	3.75744	8.36781	3.79435	1.4726	1.38134	4.63807
99	98.97	119.693	25.333	9.96	2.03	0.0478281	0.280766	1.83256	0.940944	-0.66214	2.28657	156	5.53322	4.49213	ENE	64	0.510811	1.663	5.024	3.75744	8.36781	3.79435	1.4726	1.38134	4.63807
99	98.97	119.693	25.333	14.96	1.862	0.0478281	0.280766	1.83256	0.940944	-0.66214	2.28657	156	5.53322	4.49213	ENE	64	0.510811	1.663	5.024	3.75744	8.36781	3.79435	1.4726	1.38134	4.63807
99	98.97	119.694	25.333	21.83	1.687	0.0478281	0.280766	1.83256	0.940944	-0.66214	2.28657	156	5.53322	4.49213	ENE	64	0.510811	1.663	5.024	3.75744	8.36781	3.79435	1.4726	1.38134	4.63807
99	98.97	119.694	25.333	30.97	1.421	0.0478281	0.280766	1.83256	0.940944	-0.66214	2.28657	156	5.53322	4.49213	ENE	64	0.510811	1.663	5.024	3.75744	8.36781	3.79435	1.4726	1.38134	4.63807
99	98.97	119.694	25.333	38.84	1.24	0.0478281	0.280766	1.83256	0.940944	-0.66214	2.28657	156	5.53322	4.49213	ENE	64	0.510811	1.663	5.024	3.75744	8.36781	3.79435	1.4726	1.38134	4.63807
99	98.97	119.694	25.333	47.65	1.018	0.0478281	0.280766	1.83256	0.940944	-0.66214	2.28657	156	5.53322	4.49213	ENE	64	0.510811	1.663	5.024	3.75744	8.36781	3.79435	1.4726	1.38134	4.63807
99	98.97	119.694	25.333	52.5	0.948	0.0478281	0.280766	1.83256	0.940944	-0.66214	2.28657	156	5.53322	4.49213	ENE	64	0.510811	1.663	5.024	3.75744	8.36781	3.79435	1.4726	1.38134	4.63807
99	98.97	119.694	25.333	61.29	0.192	0.0478281	0.280766	1.83256	0.940944	-0.66214	2.28657	156	5.53322	4.49213	ENE	64	0.510811	1.663	5.024	3.75744	8.36781	3.79435	1.4726	1.38134	4.63807
99	98.97	119.694	25.333	64.92	-0.396	0.0478281	0.280766	1.83256	0.940944	-0.66214	2.28657	156	5.53322	4.49213	ENE	64	0.510811	1.663	5.024	3.75744	8.36781	3.79435	1.4726	1.38134	4.63807
129	89.09	119.69	25.3137	0	2.707	0.118128	1.73529	-0.795177	0.930861	0.19934	0.817074	158	5.55361	4.51268	ENE	68	0.509756	1.427	4.763	3.94928	1.21484	24.5718	1.40623	1.29385	4.71088
129	89.09	119.69	25.3137	2.19	2.428	0.118128	1.73529	-0.795177	0.930861	0.19934	0.817074	158	5.55361	4.51268	ENE	68	0.509756	1.427	4.763	3.94928	1.21484	24.5718	1.40623	1.29385	4.71088
129	89.09	119.69	25.3137	4.83	2.137	0.118128	1.73529	-0.795177	0.930861	0.19934	0.817074	158	5.55361	4.51268	ENE	68	0.509756	1.427	4.763	3.94928	1.21484	24.5718	1.40623	1.29385	4.71088
129	89.09	119.69	25.3137	7.04	1.823	0.118128	1.73529	-0.795177	0.930861	0.19934	0.817074	158	5.55361	4.51268	ENE	68	0.509756	1.427	4.763	3.94928	1.21484	24.5718	1.40623	1.29385	4.71088
129	89.09	119.69	25.3137	8.76	1.533	0.118128	1.73529	-0.795177	0.930861	0.19934	0.817074	158	5.55361	4.51268	ENE	68	0.509756	1.427	4.763	3.94928	1.21484	24.5718	1.40623	1.29385	4.71088
129	89.09	119.69	25.3137	10.93	1.278	0.118128	1.73529	-0.795177	0.930861	0.19934	0.817074	158	5.55361	4.51268	ENE	68	0.509756	1.427	4.763	3.94928	1.21484	24.5718	1.40623	1.29385	4.71088
129	89.09	119.69	25.3136	13	0.986	0.118128	1.73529	-0.795177	0.930861	0.19934	0.817074	158	5.55361	4.51268	ENE	68	0.509756	1.427	4.763	3.94928	1.21484	24.5718	1.40623	1.29385	4.71088
129	89.09	119.69	25.3136	15.22	0.732	0.118128	1.73529	-0.795177	0.930861	0.19934	0.817074	158	5.55361	4.51268	ENE	68	0.509756	1.427	4.763	3.94928	1.21484	24.5718	1.40623	1.29385	4.71088
129	89.09	119.69	25.3136	17.71	0.441	0.118128	1.73529	-0.795177	0.930861	0.19934	0.817074	158	5.55361	4.51268	ENE	68	0.509756	1.427	4.763	3.94928	1.21484	24.5718	1.40623	1.29385	4.71088
129	89.09	119.69	25.3136	19.86	0.231	0.118128	1.73529	-0.795177	0.930861	0.19934	0.817074	158	5.55361	4.51268	ENE	68	0.509756	1.427	4.763	3.94928	1.21484	24.5718	1.40623	1.29385	4.71088
129	89.09	119.69	25.3136	21.98	-0.008	0.118128	1.73529	-0.795177	0.930861	0.19934	0.817074	158	5.55361	4.51268	ENE	68	0.509756	1.427	4.763	3.94928	1.21484	24.5718	1.40623	1.29385	4.71088
129	89.09	119.69	25.3136	23.85	-0.214	0.118128	1.73529	-0.795177	0.930861	0.19934	0.817074	158	5.55361	4.51268	ENE	68	0.509756	1.427	4.763	3.94928	1.21484	24.5718	1.40623	1.29385	4.71088
129	89.09	119.69	25.3136	26.14	-0.454	0.118128	1.73529	-0.795177	0.930861	0.19934	0.817074	158	5.55361	4.51268	ENE	68	0.509756	1.427	4.763	3.94928	1.21484	24.5718	1.40623	1.29385	4.71088
129	89.09	119.69	25.3136	27.58	-0.584	0.118128	1.73529	-0.795177	0.930861	0.19934	0.817074	158	5.55361	4.51268	ENE	68	0.509756	1.427	4.763	3.94928	1.21484	24.5718	1.40623	1.29385	4.71088
129	89.09	119.69	25.3136	29.09	-0.685	0.118128	1.73529	-0.795177	0.930861	0.19934	0.817074	158	5.55361	4.51268	ENE	68	0.509756	1.427	4.763	3.94928	1.21484	24.5718	1.40623	1.29385	4.71088
129	89.09	119.69	25.3136	30.56	-0.903	0.118128	1.73529	-0.795177	0.930861	0.19934	0.817074	158	5.55361	4.51268	ENE	68	0.509756	1.427	4.763	3.94928	1.21484	24.5718	1.40623	1.29385	4.71088
26	145.2	119.594	25.5902	0	2.799	0.0476196	0.939225	0.0904578	1.36678	0.253708	0.702783	148	5.60923	4.56875	NE	40	0.480013	0.501	3.701	9.77446	1.22862	14.4768	0.573866	0.509936	3.22642
26	145.2	119.594	25.5902	3.42	2.638	0.0476196	0.939225	0.0904578	1.36678	0.253708	0.702783	148	5.60923	4.56875	NE	40	0.480013	0.501	3.701	9.77446	1.22862	14.4768	0.573866	0.509936	3.22642
26	145.2	119.594	25.5902	6.21	2.391	0.0476196	0.939225	0.0904578	1.36678	0.253708	0.702783	148	5.60923	4.56875	NE	40	0.480013	0.501	3.701	9.77446	1.22862	14.4768	0.573866	0.509936	3.22642
26	145.2	119.594	25.5902	8.54	2.302	0.0476196	0.939225	0.0904578	1.36678	0.253708	0.702783	148	5.60923	4.56875	NE	40	0.480013	0.501	3.701	9.77446	1.22862	14.4768	0.573866	0.509936	3.22642
26	145.2	119.594	25.5903	10.96	2.183	0.0476196	0.939225	0.0904578	1.36678	0.253708	0.702783	148	5.60923	4.56875	NE	40	0.480013	0.501	3.701	9.77446	1.22862	14.4768	0.573866	0.509936	3.22642
26	145.2	119.594	25.5903	13.27	2.064	0.0476196	0.939225	0.0904578	1.36678	0.253708	0.702783	148	5.60923	4.56875	NE	40	0.480013	0.501	3.701	9.77446	1.22862	14.4768	0.573866	0.509936	3.22642
26	145.2	119.594	25.5903	16.34	1.868	0.0476196	0.939225	0.0904578	1.36678	0.253708	0.702783	148	5.60923	4.56875	NE	40	0.480013	0.501	3.701	9.77446	1.22862	14.4768	0.573866	0.509936	3.22642
26	145.2	119.594	25.5903	19.09	1.712	0.0476196	0.939225	0.0904578	1.36678	0.253708	0.702783	148	5.60923	4.56875	NE	40	0.480013	0.501	3.701	9.77446	1.22862	14.4768	0.573866	0.509936	3.22642
26	145.2	119.594	25.5904	23.11	1.477	0.0476196	0.939225	0.0904578	1.36678	0.253708	0.702783	148	5.60923	4.56875	NE	40	0.480013	0.501	3.701	9.77446	1.22862	14.4768	0.573866	0.509936	3.22642
26	145.2	119.594	25.5904	27.19	1.222	0.0476196	0.939225	0.0904578	1.36678	0.253708	0.702783	148	5.60923	4.56875	NE	40	0.480013	0.501	3.701	9.77446	1.22862	14.4768	0.573866	0.509936	3.22642
26	145.2	119.594	25.5904	31.25	1.045	0.0476196	0.939225	0.0904578	1.36678	0.253708	0.702783	148	5.60923	4.56875	NE	40	0.480013	0.501	3.701	9.77446	1.22862	14.4768	0.573866	0.509936	3.22642
26	145.2	119.594	25.5905	36.52	0.784	0.0476196	0.939225	0.0904578	1.36678	0.253708	0.702783	148	5.60923	4.56875	NE	40	0.480013	0.501	3.701	9.77446	1.22862	14.4768	0.573866	0.509936	3.22642
26	145.2	119.594	25.5905	41.94	0.502	0.0476196	0.939225	0.0904578	1.36678	0.253708	0.702783	148	5.60923	4.56875	NE	40	0.480013	0.501	3.701	9.77446	1.22862	14.4768	0.573866	0.509936	3.22642
26	145.2	119.594	25.5905	46.52	0.35	0.0476196	0.939225	0.0904578	1.36678	0.253708	0.702783	148	5.60923	4.56875	NE	40	0.480013	0.501	3.701	9.77446	1.22862	14.4768	0.573866	0.509936	3.22642
26	145.2	119.594	25.5906	52.36	0.098	0.0476196	0.939225	0.0904578	1.36678	0.253708	0.702783	148	5.60923	4.56875	NE	40	0.480013	0.501	3.701	9.77446	1.22862	14.4768	0.573866	0.509936	3.22642
26	145.2	119.594	25.5906	57.1	-0.087	0.0476196	0.939225	0.0904578	1.36678	0.253708	0.702783	148	5.60923	4.56875	NE	40	0.480013	0.501	3.701	9.77446	1.22862	14.4768	0.573866	0.509936	3.22642
26	145.2	119.594	25.5907	66.15	-0.465	0.0476196	0.939225	0.0904578	1.36678	0.253708	0.702783	148	5.60923	4.56875	NE	40	0.480013	0.501	3.701	9.77446	1.22862	14.4768	0.573866	0.509936	3.22642
26	145.2	119.594	25.5907	72.1	-0.718	0.0476196	0.939225	0.0904578	1.36678	0.253708	0.702783	148	5.60923	4.56875	NE	40	0.480013	0.501	3.701	9.77446	1.22862	14.4768	0.573866	0.509936	3.22642
26	145.2	119.594	25.5908	81.08	-1.062	0.0476196	0.939225	0.0904578	1.36678	0.253708	0.702783	148	5.60923	4.56875	NE	40	0.480013	0.501	3.701	9.77446	1.22862	14.4768	0.573866	0.509936	3.22642
22	88.55	119.577	25.5834	0	2.616	0.0577945	1.33454	-0.416346	1.02498	0.0198991	0.894025	148	5.60923	4.56875	NE	40	0.480013	0.501	3.701	9.77446	0.898613	19.7932	0.573866	0.509936	3.22642
22	88.55	119.577	25.5834	1.71	2.444	0.0577945	1.33454	-0.416346	1.02498	0.0198991	0.894025	148	5.60923	4.56875	NE	40	0.480013	0.501	3.701	9.77446	0.898613	19.7932	0.573866	0.509936	3.22642
22	88.55	119.577	25.5834	4.26	2.188	0.0577945	1.33454	-0.416346	1.02498	0.0198991	0.894025	148	5.60923	4.56875	NE	40	0.480013	0.501	3.701	9.77446	0.898613	19.7932	0.573866	0.509936	3.22642
22	88.55	119.577	25.5834	6.44	1.961	0.0577945	1.33454	-0.416346	1.02498	0.0198991	0.894025	148	5.60923	4.56875	NE	40	0.480013	0.501	3.701	9.77446	0.898613	19.7932	0.573866	0.509936	3.22642
22	88.55	119.577	25.5835	9.1	1.672	0.0577945	1.33454	-0.416346	1.02498	0.0198991	0.894025	148	5.60923	4.56875	NE	40	0.480013	0.501	3.701	9.77446	0.898613	19.7932	0.573866	0.509936	3.22642
22	88.55	119.577	25.5835	11.29	1.498	0.0577945	1.33454	-0.416346	1.02498	0.0198991	0.894025	148	5.60923	4.56875	NE	40	0.480013	0.501	3.701	9.77446	0.898613	19.7932	0.573866	0.509936	3.22642
22	88.55	119.577	25.5835	14.19	1.25	0.0577945	1.33454	-0.416346	1.02498	0.0198991	0.894025	148	5.60923	4.56875	NE	40	0.480013	0.501	3.701	9.77446	0.898613	19.7932	0.573866	0.509936	3.22642
22	88.55	119.577	25.5835	17.77	1.065	0.0577945	1.33454	-0.416346	1.02498	0.0198991	0.894025	148	5.60923	4.56875	NE	40	0.480013	0.501	3.701	9.77446	0.898613	19.7932	0.573866	0.509936	3.22642
22	88.55	119.577	25.5836	21.15	0.848	0.0577945	1.33454	-0.416346	1.02498	0.0198991	0.894025	148	5.60923	4.56875	NE	40	0.480013	0.501	3.701	9.77446	0.898613	19.7932	0.573866	0.509936	3.22642
22	88.55	119.577	25.5836	24.27	0.654	0.0577945	1.33454	-0.416346	1.02498	0.0198991	0.894025	148	5.60923	4.56875	NE	40	0.480013	0.501	3.701	9.77446	0.898613	19.7932	0.573866	0.509936	3.22642
22	88.55	119.577	25.5836	27.53	0.48	0.0577945	1.33454	-0.416346	1.02498	0.0198991	0.894025	148	5.60923	4.56875	NE	40	0.480013	0.501	3.701	9.77446	0.898613	19.7932	0.573866	0.509936	3.22642
22	88.55	119.577	25.5837	32.18	0.213	0.0577945	1.33454	-0.416346	1.02498	0.0198991	0.894025	148	5.60923	4.56875	NE	40	0.480013	0.501	3.701	9.77446	0.898613	19.7932	0.573866	0.509936	3.22642
22	88.55	119.577	25.5837	37.62	-0.149	0.0577945	1.33454	-0.416346	1.02498	0.0198991	0.894025	148	5.60923	4.56875	NE	40	0.480013	0.501	3.701	9.77446	0.898613	19.7932	0.573866	0.509936	3.22642
22	88.55	119.577	25.5838	44.66	-0.538	0.0577945	1.33454	-0.416346	1.02498	0.0198991	0.894025	148	5.60923	4.56875	NE	40	0.480013	0.501	3.701	9.77446	0.898613	19.7932	0.573866	0.509936	3.22642
22	88.55	119.577	25.5839	55.61	-1.011	0.0577945	1.33454	-0.416346	1.02498	0.0198991	0.894025	148	5.60923	4.56875	NE	40	0.480013	0.501	3.701	9.77446	0.898613	19.7932	0.573866	0.509936	3.22642
22	88.55	119.577	25.5839	66.61	-1.38	0.0577945	1.33454	-0.416346	1.02498	0.0198991	0.894025	148	5.60923	4.56875	NE	40	0.480013	0.501	3.701	9.77446	0.898613	19.7932	0.573866	0.509936	3.22642
22	88.55	119.577	25.584	73	-1.603	0.0577945	1.33454	-0.416346	1.02498	0.0198991	0.894025	148	5.60923	4.56875	NE	40	0.480013	0.501	3.701	9.77446	0.898613	19.7932	0.573866	0.509936	3.22642
57	250.89	119.606	25.5624	-0.004	2.628	0.0170254	0.47839	1.06374	1.62216	0.213646	1.27782	149	5.60573	4.56017	NNE	21	0.398481	0.583	2.569	11.8553	2.57188	7.25967	0.472847	0.451843	2.53251
57	250.89	119.606	25.5624	1.464	2.437	0.0170254	0.47839	1.06374	1.62216	0.213646	1.27782	149	5.60573	4.56017	NNE	21	0.398481	0.583	2.569	11.8553	2.57188	7.25967	0.472847	0.451843	2.53251
57	250.89	119.606	25.5624	3.145	2.244	0.0170254	0.47839	1.06374	1.62216	0.213646	1.27782	149	5.60573	4.56017	NNE	21	0.398481	0.583	2.569	11.8553	2.57188	7.25967	0.472847	0.451843	2.53251
57	250.89	119.606	25.5624	5.383	1.995	0.0170254	0.47839	1.06374	1.62216	0.213646	1.27782	149	5.60573	4.56017	NNE	21	0.398481	0.583	2.569	11.8553	2.57188	7.25967	0.472847	0.451843	2.53251
57	250.89	119.606	25.5624	8.449	1.71	0.0170254	0.47839	1.06374	1.62216	0.213646	1.27782	149	5.60573	4.56017	NNE	21	0.398481	0.583	2.569	11.8553	2.57188	7.25967	0.472847	0.451843	2.53251
57	250.89	119.606	25.5624	7.483	1.771	0.0170254	0.47839	1.06374	1.62216	0.213646	1.27782	149	5.60573	4.56017	NNE	21	0.398481	0.583	2.569	11.8553	2.57188	7.25967	0.472847	0.451843	2.53251
57	250.89	119.606	25.5624	10.19	1.57	0.0170254	0.47839	1.06374	1.62216	0.213646	1.27782	149	5.60573	4.56017	NNE	21	0.398481	0.583	2.569	11.8553	2.57188	7.25967	0.472847	0.451843	2.53251
57	250.89	119.606	25.5625	14.563	1.292	0.0170254	0.47839	1.06374	1.62216	0.213646	1.27782	149	5.60573	4.56017	NNE	21	0.398481	0.583	2.569	11.8553	2.57188	7.25967	0.472847	0.451843	2.53251
57	250.89	119.606	25.5625	19.834	1.067	0.0170254	0.47839	1.06374	1.62216	0.213646	1.27782	149	5.60573	4.56017	NNE	21	0.398481	0.583	2.569	11.8553	2.57188	7.25967	0.472847	0.451843	2.53251
57	250.89	119.606	25.5625	25.39	0.851	0.0170254	0.47839	1.06374	1.62216	0.213646	1.27782	149	5.60573	4.56017	NNE	21	0.398481	0.583	2.569	11.8553	2.57188	7.25967	0.472847	0.451843	2.53251
57	250.89	119.606	25.5625	29.178	0.685	0.0170254	0.47839	1.06374	1.62216	0.213646	1.27782	149	5.60573	4.56017	NNE	21	0.398481	0.583	2.569	11.8553	2.57188	7.25967	0.472847	0.451843	2.53251
57	250.89	119.606	25.5625	33.957	0.476	0.0170254	0.47839	1.06374	1.62216	0.213646	1.27782	149	5.60573	4.56017	NNE	21	0.398481	0.583	2.569	11.8553	2.57188	7.25967	0.472847	0.451843	2.53251
57	250.89	119.606	25.5626	44.877	0.09	0.0170254	0.47839	1.06374	1.62216	0.213646	1.27782	149	5.60573	4.56017	NNE	21	0.398481	0.583	2.569	11.8553	2.57188	7.25967	0.472847	0.451843	2.53251
57	250.89	119.606	25.5626	46.674	0.081	0.0170254	0.47839	1.06374	1.62216	0.213646	1.27782	149	5.60573	4.56017	NNE	21	0.398481	0.583	2.569	11.8553	2.57188	7.25967	0.472847	0.451843	2.53251
57	250.89	119.606	25.5627	63.606	-0.153	0.0170254	0.47839	1.06374	1.62216	0.213646	1.27782	149	5.60573	4.56017	NNE	21	0.398481	0.583	2.569	11.8553	2.57188	7.25967	0.472847	0.451843	2.53251
57	250.89	119.607	25.5628	79.664	-0.218	0.0170254	0.47839	1.06374	1.62216	0.213646	1.27782	149	5.60573	4.56017	NNE	21	0.398481	0.583	2.569	11.8553	2.57188	7.25967	0.472847	0.451843	2.53251
57	250.89	119.607	25.5628	85.332	-0.213	0.0170254	0.47839	1.06374	1.62216	0.213646	1.27782	149	5.60573	4.56017	NNE	21	0.398481	0.583	2.569	11.8553	2.57188	7.25967	0.472847	0.451843	2.53251
57	250.89	119.607	25.563	125.407	-0.42	0.0170254	0.47839	1.06374	1.62216	0.213646	1.27782	149	5.60573	4.56017	NNE	21	0.398481	0.583	2.569	11.8553	2.57188	7.25967	0.472847	0.451843	2.53251
57	250.89	119.607	25.5631	154.806	-0.64	0.0170254	0.47839	1.06374	1.62216	0.213646	1.27782	149	5.60573	4.56017	NNE	21	0.398481	0.583	2.569	11.8553	2.57188	7.25967	0.472847	0.451843	2.53251
57	250.89	119.607	25.5632	169.535	-0.7	0.0170254	0.47839	1.06374	1.62216	0.213646	1.27782	149	5.60573	4.56017	NNE	21	0.398481	0.583	2.569	11.8553	2.57188	7.25967	0.472847	0.451843	2.53251
57	250.89	119.607	25.5633	191.327	-0.883	0.0170254	0.47839	1.06374	1.62216	0.213646	1.27782	149	5.60573	4.56017	NNE	21	0.398481	0.583	2.569	11.8553	2.57188	7.25967	0.472847	0.451843	2.53251
57	250.89	119.608	25.5635	231.36	-1.311	0.0170254	0.47839	1.06374	1.62216	0.213646	1.27782	149	5.60573	4.56017	NNE	21	0.398481	0.583	2.569	11.8553	2.57188	7.25967	0.472847	0.451843	2.53251
228	80.6	118.571	24.5145	0	2.402	0.0609562	0.509491	0.97287	0.323835	0.143467	0.753154	179	4.90966	3.99112	E	88	0.583483	0.976	5.003	5.04372	2.62015	7.78668	0.973421	0.81176	4.77114
228	80.6	118.571	24.5145	1.95	2.207	0.0609562	0.509491	0.97287	0.323835	0.143467	0.753154	179	4.90966	3.99112	E	88	0.583483	0.976	5.003	5.04372	2.62015	7.78668	0.973421	0.81176	4.77114
228	80.6	118.571	24.5145	4.12	2.006	0.0609562	0.509491	0.97287	0.323835	0.143467	0.753154	179	4.90966	3.99112	E	88	0.583483	0.976	5.003	5.04372	2.62015	7.78668	0.973421	0.81176	4.77114
228	80.6	118.571	24.5145	5.9	1.87	0.0609562	0.509491	0.97287	0.323835	0.143467	0.753154	179	4.90966	3.99112	E	88	0.583483	0.976	5.003	5.04372	2.62015	7.78668	0.973421	0.81176	4.77114
228	80.6	118.571	24.5144	7.96	1.745	0.0609562	0.509491	0.97287	0.323835	0.143467	0.753154	179	4.90966	3.99112	E	88	0.583483	0.976	5.003	5.04372	2.62015	7.78668	0.973421	0.81176	4.77114
228	80.6	118.571	24.5144	10.3	1.541	0.0609562	0.509491	0.97287	0.323835	0.143467	0.753154	179	4.90966	3.99112	E	88	0.583483	0.976	5.003	5.04372	2.62015	7.78668	0.973421	0.81176	4.77114
228	80.6	118.571	24.5144	12.22	1.374	0.0609562	0.509491	0.97287	0.323835	0.143467	0.753154	179	4.90966	3.99112	E	88	0.583483	0.976	5.003	5.04372	2.62015	7.78668	0.973421	0.81176	4.77114
228	80.6	118.571	24.5144	14.67	1.261	0.0609562	0.509491	0.97287	0.323835	0.143467	0.753154	179	4.90966	3.99112	E	88	0.583483	0.976	5.003	5.04372	2.62015	7.78668	0.973421	0.81176	4.77114
228	80.6	118.571	24.5144	16.76	1.102	0.0609562	0.509491	0.97287	0.323835	0.143467	0.753154	179	4.90966	3.99112	E	88	0.583483	0.976	5.003	5.04372	2.62015	7.78668	0.973421	0.81176	4.77114
228	80.6	118.571	24.5144	19.68	0.913	0.0609562	0.509491	0.97287	0.323835	0.143467	0.753154	179	4.90966	3.99112	E	88	0.583483	0.976	5.003	5.04372	2.62015	7.78668	0.973421	0.81176	4.77114
228	80.6	118.571	24.5144	22.36	0.791	0.0609562	0.509491	0.97287	0.323835	0.143467	0.753154	179	4.90966	3.99112	E	88	0.583483	0.976	5.003	5.04372	2.62015	7.78668	0.973421	0.81176	4.77114
228	80.6	118.571	24.5143	25.29	0.641	0.0609562	0.509491	0.97287	0.323835	0.143467	0.753154	179	4.90966	3.99112	E	88	0.583483	0.976	5.003	5.04372	2.62015	7.78668	0.973421	0.81176	4.77114
228	80.6	118.571	24.5143	28.33	0.491	0.0609562	0.509491	0.97287	0.323835	0.143467	0.753154	179	4.90966	3.99112	E	88	0.583483	0.976	5.003	5.04372	2.62015	7.78668	0.973421	0.81176	4.77114
228	80.6	118.571	24.5143	33.05	0.237	0.0609562	0.509491	0.97287	0.323835	0.143467	0.753154	179	4.90966	3.99112	E	88	0.583483	0.976	5.003	5.04372	2.62015	7.78668	0.973421	0.81176	4.77114
228	80.6	118.571	24.5143	37.69	-0.026	0.0609562	0.509491	0.97287	0.323835	0.143467	0.753154	179	4.90966	3.99112	E	88	0.583483	0.976	5.003	5.04372	2.62015	7.78668	0.973421	0.81176	4.77114
228	80.6	118.571	24.5142	42.28	-0.289	0.0609562	0.509491	0.97287	0.323835	0.143467	0.753154	179	4.90966	3.99112	E	88	0.583483	0.976	5.003	5.04372	2.62015	7.78668	0.973421	0.81176	4.77114
228	80.6	118.571	24.5142	47.06	-0.514	0.0609562	0.509491	0.97287	0.323835	0.143467	0.753154	179	4.90966	3.99112	E	88	0.583483	0.976	5.003	5.04372	2.62015	7.78668	0.973421	0.81176	4.77114
228	80.6	118.57	24.5142	51.34	-0.779	0.0609562	0.509491	0.97287	0.323835	0.143467	0.753154	179	4.90966	3.99112	E	88	0.583483	0.976	5.003	5.04372	2.62015	7.78668	0.973421	0.81176	4.77114
228	80.6	118.57	24.5142	54.86	-0.972	0.0609562	0.509491	0.97287	0.323835	0.143467	0.753154	179	4.90966	3.99112	E	88	0.583483	0.976	5.003	5.04372	2.62015	7.78668	0.973421	0.81176	4.77114
228	80.6	118.57	24.5141	57.73	-1.117	0.0609562	0.509491	0.97287	0.323835	0.143467	0.753154	179	4.90966	3.99112	E	88	0.583483	0.976	5.003	5.04372	2.62015	7.78668	0.973421	0.81176	4.77114

## Sheet: Sheet1
反射型	低潮阶地/裂流型
过渡型	低潮阶地型
耗散型	低潮沙坝/裂流型
	无沙坝耗散型
	完全耗散型
